# Supplementary material for: Base-mediated cascade amidination/N-alkylation of amines by alcohols
Source: Royal Society of Chemistry journal article supplement (doi:10.1039/d0cc04831c), 2020-01-01

Supporting Information for:

## Base mediated cascade amidination/alkylation of amines by alcohols

Chunyan Zhang,<sup>\*,a</sup> Zuyu Liang,<sup>a</sup> Fenghong Lu,<sup>a</sup> Xiaofei Jia,<sup>a</sup> Guoying Zhang<sup>\*,a</sup> and Mao-Lin Hu<sup>\*,b</sup>

<sup>a</sup> Key Laboratory of Sensor Analysis of Tumor Marker, Ministry of Education; Shandong Key Laboratory of Biochemical Analysis; Key Laboratory of Analytical Chemistry for Life Science in Universities of Shandong; College of Chemistry and Molecular Engineering, Qingdao University of Science and Technology, Qingdao 266042, P. R. China.

<sup>b</sup> College of Chemistry and Materials Engineering, Wenzhou University, Wenzhou 325035, P. R. China.

E-mail: zhanggy@qust.edu.cn; maolin\_hu@yahoo.com

## Table of contents

|   |                                                               |     |
|---|---------------------------------------------------------------|-----|
| 1 | General .....                                                 | S2  |
| 2 | Screening of reaction parameters .....                        | S3  |
| 3 | General procedure for the <i>N</i> -alkylation reaction ..... | S9  |
| 4 | Characterization data .....                                   | S10 |
| 5 | Gram scale experiments .....                                  | S24 |
| 6 | Synthesis of <b>C40</b> .....                                 | S25 |
| 7 | Mechanistic investigations .....                              | S26 |
| 8 | Reference.....                                                | S31 |
| 9 | NMR Spectra .....                                             | S32 |

## 1. General

**Experimental:** All reactions and manipulations with air sensitive compounds being present were performed under dry argon (Ar 5.0) or nitrogen (N<sub>2</sub> 5.0), using Schlenk and glove box techniques. Non-halogenated solvents were dried over sodium benzophenone, 2-methyltetrahydrofuran (2-Me-THF) was dried over calcium hydride, and halogenated solvents were dried over P<sub>2</sub>O<sub>5</sub>. Deuterated solvents were bought from Cambridge Isotope Laboratories, distilled accordingly, and stored over molecular sieves (3 Å). Other chemicals were purchased from commercial vendors and used without further purification. NMR spectra were collected on a Varian INOVA 300 and 400 MHz spectrometer. Chemical shifts ( $\delta$ ) are reported in ppm relative to residual solvent signal. Coupling constants ( $J$ ) are given in Hz (coupling patterns: s: singlet, s\_br: broad singlet, d: doublet, t: triplet, q: quartet, m: multiplet). GC analyses were carried out using an Agilent Technologies 6890N system equipped with a Machinery-Nagel (MN) Optima 5 HT column (30 m, 320  $\mu$ m, 0.25  $\mu$ m) or an Agilent Technologies 6850 system equipped with a MN Optima 17 column (30 m, 320  $\mu$ m, 0.25  $\mu$ m). GC/MS analyses were carried out on an Agilent 7890A/MSD 5975C system equipped with a HP-5MS column (30 m, 320  $\mu$ m, 0.25  $\mu$ m). High resolution mass spectra (HRMS) were recorded on Bruker MicroTOF-QII mass (ESI). MN silica gel 60 (0.040 – 0.063 mm particle size) was used for flash column chromatography.

## 2. Screening of reaction parameters

Closed system:

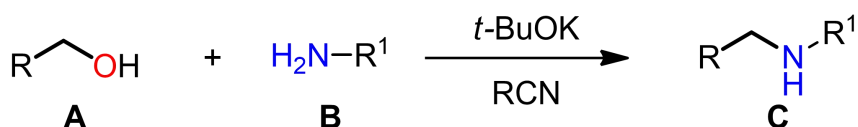

Using a nitrogen-filled glove box, an oven-dried pressure tube (38 mL volume) was charged with a magnetic stirring bar, base, alcohol (**A1**), amine (**B1**), nitrile, and solvent. Then the seal tube was closed tightly with a teflon cap, removed from the glove box and immersed into a pre-heated oil bath (design temperature). After design time the reaction was cooled, quenched with half-saturated brine and extracted with dichloromethane (4 x 15 mL). The combined organic phase was dried over Na<sub>2</sub>SO<sub>4</sub> and concentrated. A small aliquot of the organic phase was analyzed by GC or GC-MS to monitor product formation. Purification of the remainder by column chromatography on silica gel gave the corresponding products **C1** (pentane/ethyl ether = 15/1 – 5/1) in the reported yield.

| Entry    | Parameter                                      |
|----------|------------------------------------------------|
| Table S1 | The difference of base screening               |
| Table S2 | The difference of solvent screening            |
| Table S3 | Screening the loading of <i>t</i> -BuOK        |
| Table S4 | Reaction temperature screening                 |
| Table S5 | The ratio of <b>A1</b> and <b>B1</b> screening |
| Table S6 | Reaction system screening                      |

Table S1: The difference of base screening <sup>a</sup>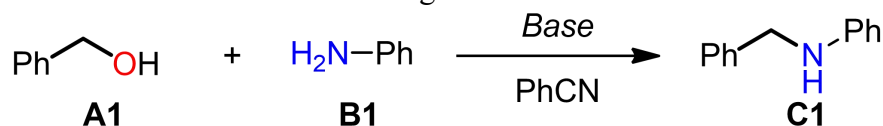

| Entry | Base (1.6 equiv)                | C1 (%) |
|-------|---------------------------------|--------|
| 1     | Li <sub>2</sub> CO <sub>3</sub> | 0      |
| 2     | LiOH                            | 0      |
| 3     | <i>t</i> -BuOLi                 | 0      |
| 4     | LiHMDS                          | 0      |
| 5     | LDA                             | 0      |
| 6     | Na <sub>2</sub> CO <sub>3</sub> | 0      |
| 7     | NaOH                            | 0      |
| 8     | <i>t</i> -BuONa                 | 15     |
| 9     | NaHMDS                          | 0      |
| 10    | NaHCO <sub>3</sub>              | 0      |
| 11    | NaH                             | <5     |
| 12    | NaNH <sub>2</sub>               | <5     |
| 13    | NaOAc                           | 0      |
| 14    | K <sub>2</sub> CO <sub>3</sub>  | 0      |
| 15    | KHCO <sub>3</sub>               | 0      |
| 16    | K <sub>3</sub> PO <sub>4</sub>  | 0      |
| 17    | K <sub>2</sub> HPO <sub>4</sub> | 0      |
| 18    | KOH                             | 0      |
| 19    | <i>t</i> -BuOK                  | 95     |
| 20    | KHMDS                           | 86     |
| 21    | KH                              | 73     |
| 22    | Cs <sub>2</sub> CO <sub>3</sub> | 0      |
| 23    | CsOH                            | 0      |
| 24    | <i>t</i> -BuOCs                 | <5     |
| 25    | Et <sub>3</sub> N               | 0      |
| 26    | Pyridine                        | 0      |
| 27    | DBU                             | 0      |
| 28    | TMEDA                           | 0      |
| 29    | DABCO                           | 0      |
| 30    | DMAP                            | 0      |
| 31    | -                               | 0      |

<sup>a</sup> Reaction conditions: *base* (0.8 mmol), **A1** (1.0 mmol, 104 μL), **B1** (0.6 mmol, 55 μL), PhCN (0.5 mmol, 51 μL), 1,4-dioxane (2.0 mL), 120 °C (extern temperature), N<sub>2</sub>, 15 h. Yield of **C1** determined by GC-analysis using *n*-dodecane (50 μL) as internal standard.

Table S2: The difference of solvent screening <sup>a</sup>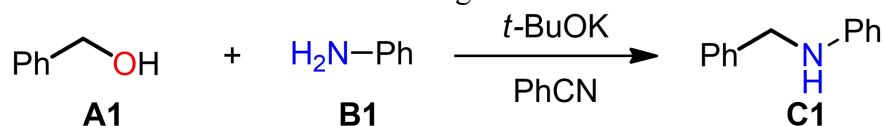

| Entry | Solvent (2 mL)                                                  | C1 (%) |
|-------|-----------------------------------------------------------------|--------|
| 1     | xylene                                                          | 49     |
| 2     | toluene                                                         | 64     |
| 3     | benzene                                                         | 56     |
| 4     | anisole                                                         | 82     |
| 5     | 1,4-dioxane                                                     | 95     |
| 6     | THF                                                             | 36     |
| 7     | 2-THF                                                           | 74     |
| 8     | diglyme                                                         | 58     |
| 9     | CH <sub>3</sub> OH                                              | 0      |
| 10    | CH <sub>3</sub> CH <sub>2</sub> OH                              | 0      |
| 11    | <i>i</i> -PrOH                                                  | 0      |
| 12    | <i>t</i> -BuOH                                                  | <5     |
| 13    | <i>t</i> -AmOH                                                  | 7      |
| 14    | DCM                                                             | 0      |
| 15    | DCE                                                             | 0      |
| 16    | CHCl <sub>3</sub>                                               | 0      |
| 17    | CH <sub>3</sub> NO <sub>2</sub>                                 | 0      |
| 18    | NMP                                                             | 32     |
| 19    | DMSO                                                            | 33     |
| 20    | DMF                                                             | 7      |
| 21    | DMAc                                                            | 6      |
| 22    | CH <sub>3</sub> CO <sub>2</sub> CH <sub>2</sub> CH <sub>3</sub> | 16     |

<sup>a</sup> Reaction conditions: *t*-BuOK (0.8 mmol), **A1** (1.0 mmol, 104 μL), **B1** (0.6 mmol, 55 μL), PhCN (0.5 mmol, 51 μL), solvent (2.0 mL), 120 °C (extern temperature), N<sub>2</sub>, 15 h. Yield of **C1** determined by GC-analysis using *n*-dodecane (50 μL) as internal standard.

Table S3: Screening the loading of *t*-BuOK <sup>a</sup>

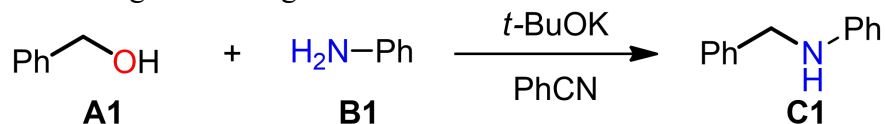

| Entry | <i>t</i> -BuOK (mmol) | <b>C1</b> (%) |
|-------|-----------------------|---------------|
| 1     | 0                     | 0             |
| 2     | 0.1                   | 0             |
| 3     | 0.2                   | <5            |
| 4     | 0.4                   | 34            |
| 5     | 0.5                   | 59            |
| 6     | 0.6                   | 72            |
| 7     | 0.7                   | 91            |
| 8     | 0.8                   | 95            |
| 9     | 0.9                   | 94            |
| 10    | 1.0                   | 95            |
| 11    | 1.2                   | 94            |
| 12    | 1.4                   | 95            |
| 13    | 1.6                   | 91            |
| 14    | 1.8                   | 89            |
| 15    | 2.0                   | 85            |

<sup>a</sup> Reaction conditions: *t*-BuOK (x mmol), **A1** (1.0 mmol, 104  $\mu$ L), **B1** (0.6 mmol, 55  $\mu$ L), PhCN (0.5 mmol, 51  $\mu$ L), 1,4-dioxane (2.0 mL), 120  $^{\circ}$ C (extern temperature), N<sub>2</sub>, 15 h. Yield of **C1** determined by GC-analysis using *n*-dodecane (50  $\mu$ L) as internal standard.

Table S4: Reaction temperature screening<sup>a</sup>

c1ccccc1CO (A1) + Nc1ccccc1 (B1)  $\xrightarrow[\text{PhCN}]{t\text{-BuOK}}$  c1ccccc1CN(Cc2ccccc2) (C1)

| Entry           | T [°C] | C1 (%) |
|-----------------|--------|--------|
| 1               | RT     | 0      |
| 2               | 40     | 0      |
| 3               | 60     | 0      |
| 4               | 80     | 21     |
| 5               | 100    | 52     |
| 6               | 120    | 95     |
| 7               | 130    | 94     |
| 8 <sup>b</sup>  | 140    | 88     |
| 9 <sup>b</sup>  | 150    | 62     |
| 10 <sup>b</sup> | 160    | 41     |
| 11 <sup>b</sup> | 180    | <5     |

<sup>a</sup> Reaction conditions: *t*-BuOK (0.8 mmol), **A1** (1.0 mmol, 104 μL), **B1** (0.6 mmol, 55 μL), PhCN (0.5 mmol, 51 μL), 1,4-dioxane (2.0 mL), T (extern temperature), N<sub>2</sub>, 15 h. Yield of **C1** determined by GC-analysis using *n*-dodecane (50 μL) as internal standard.

<sup>b</sup> Reactions carried out in the autoclave.

Table S5: The ratio of **A1** and **B1** screening<sup>a</sup>

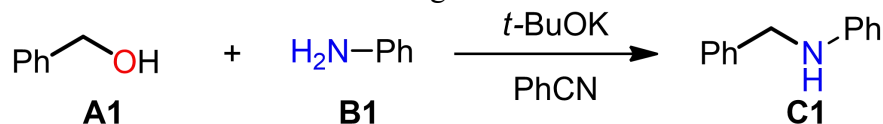

| Entry     | <b>A1</b> (mmol) | <b>B1</b> (mmol) | <b>PhCN</b> (mmol) | <b>C1</b> (%) |
|-----------|------------------|------------------|--------------------|---------------|
| 1         | 0.5              | 0.6              | 0.5                | 76            |
| 2         | 0.6              | 0.6              | 0.5                | 88            |
| 3         | 0.7              | 0.6              | 0.5                | 90            |
| 4         | 0.8              | 0.6              | 0.5                | 90            |
| 5         | 0.9              | 0.6              | 0.5                | 91            |
| 6         | 1.0              | 0.6              | 0.5                | 95            |
| 7         | 1.0              | 0.5              | 0.5                | 69            |
| 8         | 1.0              | 0.55             | 0.5                | 90            |
| 9         | 1.0              | 0.75             | 0.5                | 95            |
| 10        | 1.0              | 0.5              | 0                  | 0             |
| 11        | 1.0              | 0.5              | 0.1                | 10            |
| 12        | 1.0              | 0.5              | 0.25               | 39            |
| 13        | 1.0              | 0.5              | 0.75               | 90            |
| <b>14</b> | <b>1.0</b>       | <b>0.5</b>       | <b>0.8</b>         | <b>96</b>     |
| 15        | 1.0              | 0.5              | 0.85               | 95            |
| 16        | 1.0              | 0.5              | 0.9                | 96            |
| 17        | 1.0              | 0.5              | 1.0                | 96            |
| 18        | 0.5              | 1.0              | 0.5                | 71            |
| 19        | 0.5              | 1.0              | 0.75               | 71            |
| 20        | 0.5              | 1.0              | 1.0                | 73            |

<sup>a</sup> Reaction conditions: *t*-BuOK (0.8 mmol), **A1** (x mmol), **B1** (x mmol), PhCN (x mmol), 1,4-dioxane (2.0 mL), 120 °C (extern temperature), N<sub>2</sub>, 15 h. Yield of **C1** determined by GC-analysis using *n*-dodecane (50 μL) as internal standard.



Table S6: Reaction system screening<sup>a</sup>

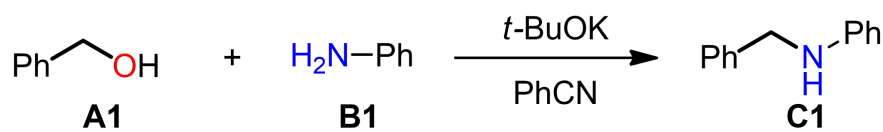

| Entry | System      |                | C1 (%) |
|-------|-------------|----------------|--------|
| 1     | Seal tube   | N <sub>2</sub> | 96     |
| 2     | Seal tube   | Ar             | 95     |
| 3     | Seal tube   | air            | 83     |
| 4     | Seal tube   | O <sub>2</sub> | <5     |
| 5     | Open-reflux | N <sub>2</sub> | 91     |
| 6     | Open-reflux | Ar             | 90     |
| 7     | Open-reflux | air            | 81     |
| 8     | Open-reflux | O <sub>2</sub> | <5     |

<sup>a</sup> Reaction conditions: *t*-BuOK (0.8 mmol), **A1** (1.0 mmol), **B1** (0.5 mmol), PhCN (0.8 mmol), 1,4-dioxane (2.0 mL), 120 °C (extern temperature), N<sub>2</sub>, 15 h. Yield of **C1** determined by GC-analysis using *n*-dodecane (50 μL) as internal standard.

### 3. General procedure for the *N*-alkylation reaction

Closed system:

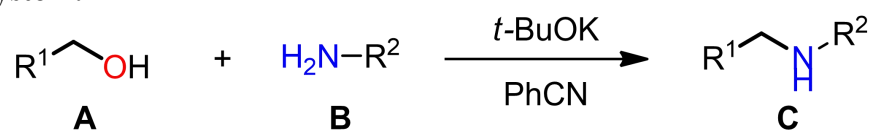

Using a nitrogen-filled glove box, an oven-dried pressure tube (38 mL volume) was charged with a magnetic stirring bar, *t*-BuOK (0.8 mmol, 90 mg), alcohols **A** (1.0 mmol), amines **B** (0.5 mmol), nitriles **D** (0.8 mmol), toluene (2.0 mL). The seal tube was closed tightly with a teflon cap, removed from the glove box and immersed into a pre-heated oil bath (120 °C). After 15 hours the reaction was cooled, quenched with half-saturated brine and extracted with dichloromethane (4 x 15 mL). The combined organic phase was dried over Na<sub>2</sub>SO<sub>4</sub> and concentrated. A small aliquot of the organic phase was analyzed by GC or GC-MS to monitor product formation. Purification of the remainder by column chromatography on silica gel gave the corresponding products **C** (pentane/ethyl ether = 15/1 – 5/1) in the reported yield, respectively.

#### 4. Characterization data

***N*-benzylaniline (C1)** :The title compound was prepared according to the general

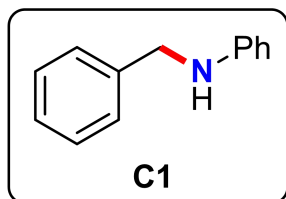

procedure and purified by column chromatography to give the light yellow oil 83 mg, 91% yield. Purification by column chromatography on silica gel (pentane/ethyl ether = 20 : 1).

**<sup>1</sup>H NMR** (299.86 MHz, 23.0 °C, CDCl<sub>3</sub>): δ = 7.40 – 7.31 (m, 5H), 7.21 (t, *J* = 7.6 Hz, 2H), 6.76 (t, *J* = 7.2 Hz, 1H), 6.67 (d, *J* = 8.1 Hz, 2H), 4.36 (s, 2H), 4.06 (bs, 1H) ppm; **<sup>13</sup>C NMR** (75.41 MHz, 23.0 °C, CDCl<sub>3</sub>): δ = 148.1, 139.4, 129.2, 128.6, 127.5, 127.2, 117.5, 112.8, 48.3 ppm. **HRMS** (ESI) calcd. for C<sub>13</sub>H<sub>14</sub>N [M+H]: 184.1126, found: 184.1129.

***N*-(4-chlorobenzyl)aniline (C2)**: The title compound was prepared according to the

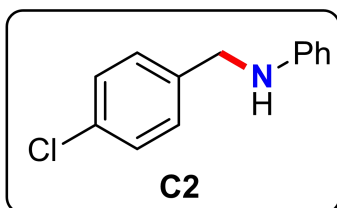

general procedure and purified by column chromatography to give as the light yellow oil 89 mg, 82% yield. Purification by column chromatography on silica gel (pentane/ethyl ether = 20 : 1). **<sup>1</sup>H NMR** (299.86 MHz,

23.0 °C, CDCl<sub>3</sub>): δ = 7.35 (d, *J* = 3.8 Hz, 4H), 7.27 – 7.21 (m, 2H), 6.82 – 6.77 (m, 1H), 6.68 – 6.65 (m, 2H), 4.35 (s, 2H), 4.09 (bs, 1H) ppm; **<sup>13</sup>C NMR** (75.41 MHz, 23.0 °C, CDCl<sub>3</sub>): δ = 147.7, 137.9, 132.7, 129.2, 128.7, 128.6, 117.7, 112.8, 47.5 ppm.

**HRMS** (ESI) calcd. for C<sub>13</sub>H<sub>13</sub>ClN [M+H]: 218.0737, found: 218.0738.

***N*-(4-bromobenzyl)aniline (C3)**: The title compound was prepared according to the

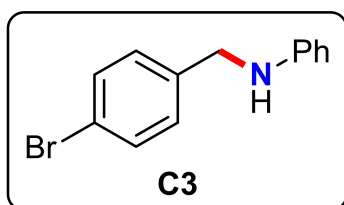

general procedure and purified by column chromatography to give the yellow oil 92 mg, 70% yield. Purification by column chromatography on silica gel (pentane/ethyl ether = 20 : 1). **<sup>1</sup>H NMR** (299.86 MHz,

23.0 °C, CDCl<sub>3</sub>): δ = 7.58-7.55 (m, 2H), 7.36 – 7.29 (m, 4H), 6.87-6.82 (m, 1H), 6.71 (d, *J* = 7.1 Hz, 2H), 4.39 (s, 2H), 4.15 (bs, 1H) ppm; **<sup>13</sup>C NMR** (75.41 MHz, 23.0 °C, CDCl<sub>3</sub>): δ = 147.7, 138.5, 131.6, 129.3, 129.0, 120.9, 117.8, 112.8, 47.6 ppm. **HRMS**

(ESI) calcd. for  $C_{13}H_{13}BrN$  [M+H]: 262.0231, found: 262.0235.

***N*-(3-methylbenzyl)aniline (C4):** The title compound was prepared according to the

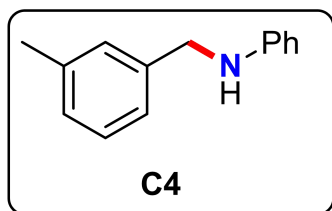

general procedure and purified by column chromatography to give the yellow oil 83 mg, 84% yield. Purification by column chromatography on silica gel (pentane/ethyl ether = 30 : 1).  $^1H$  NMR (299.86 MHz, 23.0 °C,  $CDCl_3$ ):  $\delta$  =

7.23-7.18 (m, 5H), 7.15 (d,  $J$  = 7.2 Hz, 1H), 6.74 (t,  $J$  = 7.3 Hz, 1H), 6.64 (d,  $J$  = 7.6 Hz, 2H), 4.27 (s, 2H), 3.95 (bs, 1H), 2.38 (s, 3H) ppm;  $^{13}C$  NMR (75.41 MHz, 23.0 °C,  $CDCl_3$ ):  $\delta$  = 148.1, 139.3, 138.2, 129.1, 128.4, 128.2, 127.9, 124.5, 117.4, 112.7, 48.2, 21.3 ppm. HRMS (ESI) calcd. for  $C_{14}H_{16}N$  [M+H]: 198.1283, found: 198.1278.

***N*-(2-methylbenzyl)aniline (C5):** The title compound was prepared according to the

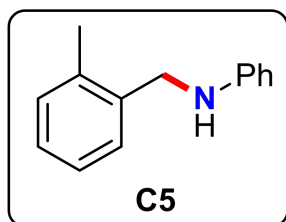

general procedure and purified by column chromatography to give the yellow oil 67 mg, 68% yield. Purification by column chromatography on silica gel (pentane/ethyl ether = 30 : 1).

$^1H$  NMR (299.86 MHz, 23.0 °C,  $CDCl_3$ ):  $\delta$  = 7.43 (d,  $J$  = 6.1 Hz, 1H), 7.31 – 7.26 (m, 5H), 6.85 – 6.68 (m, 1H), 6.74 – 6.71 (m, 2H), 4.35 (s, 2H), 3.90 (bs, 1H), 2.47 (d,  $J$  = 1.7 Hz, 3H) ppm;  $^{13}C$  NMR (75.41 MHz, 23.0 °C,  $CDCl_3$ ):  $\delta$  = 148.2, 136.9, 136.3, 130.3, 129.2, 128.2, 127.3, 126.1, 117.4, 112.6, 46.3, 18.9 ppm. HRMS (ESI) calcd. for  $C_{14}H_{16}N$  [M+H]: 198.1283, found: 198.1281.

***N*-(4-(tert-butyl)benzyl)aniline (C6):** The title compound was prepared according to

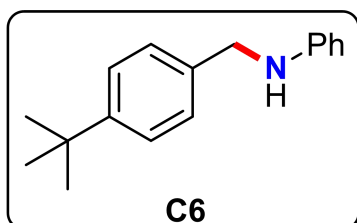

the general procedure and purified by column chromatography to give a white solid 108 mg, 90% yield. Purification by column chromatography on silica gel (pentane/ethyl ether = 30 : 1).  $^1H$  NMR (299.86 MHz,

23.0 °C,  $CD_2Cl_2$ ):  $\delta$  = 7.36 (dd,  $J$  = 19.9, 8.3 Hz, 4H), 7.17 (t,  $J$  = 6.2 Hz, 2H), 6.72 (t,  $J$  = 7.3 Hz, 1H), 6.65 (d,  $J$  = 7.8 Hz, 2H), 4.30 (s, 2H), 4.00 (bs, 1H), 1.33 (s, 9H) ppm;  $^{13}C$  NMR (75.41 MHz, 23.0 °C,  $CD_2Cl_2$ ):  $\delta$  = 150.2, 148.5, 136.7, 129.2, 127.3, 125.5,

117.3, 112.8, 47.8, 34.5, 31.2 ppm. **HRMS** (ESI) calcd. for C<sub>17</sub>H<sub>22</sub>N [M+H]: 240.1752, found: 240.1753.

**N-(4-methoxybenzyl)aniline (C7):** The title compound was prepared according to the

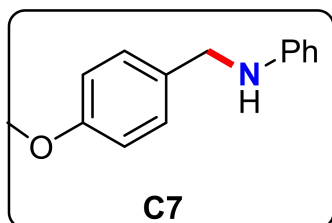

general procedure and purified by column chromatography to give a white solid 98 mg, 92% yield. Purification by column chromatography on silica gel (pentane/ethyl ether = 30 : 1). **<sup>1</sup>H NMR** (299.86 MHz, 23.0 °C, CDCl<sub>3</sub>): δ =

7.31 (d, *J* = 8.3 Hz, 2H), 7.19 (t, *J* = 7.5 Hz, 2H), 6.90 (d, *J* = 8.0 Hz, 2H), 6.73 (t, *J* = 7.3 Hz, 1H), 6.63 (d, *J* = 7.7 Hz, 2H), 4.27 (s, 2H), 3.96 (bs, 1H), 3.82 (s, 3H) ppm; **<sup>13</sup>C NMR** (75.41 MHz, 23.0 °C, CDCl<sub>3</sub>): δ = 158.8, 148.2, 131.3, 129.2, 128.8, 117.4, 114.0, 112.8, 55.3, 47.7 ppm. **HRMS** (ESI) calcd. for C<sub>14</sub>H<sub>16</sub>NO [M+H]: 214.1232, found: 214.1234.

**N-(2-methoxybenzyl)aniline (C8):** The title compound was prepared according to the

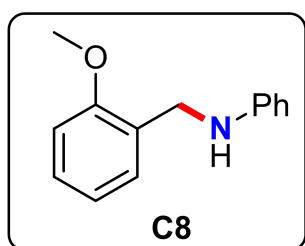

general procedure and purified by column chromatography to give a white solid 73 mg, 69% yield. Purification by column chromatography on silica gel (pentane/ethyl ether = 30 : 1). **<sup>1</sup>H NMR** (299.86 MHz, 23.0 °C, CDCl<sub>3</sub>): δ = 7.33 (d, *J* = 7.4 Hz, 1H), 7.28 (t, *J* = 8.1 Hz, 1H), 7.19 (dd, *J* = 11.3,

4.3 Hz, 2H), 6.92 (dd, *J* = 16.1, 7.9 Hz, 2H), 6.74 – 6.67 (m, 3H), 4.36 (s, 2H), 4.15 (bs, 1H), 3.88 (s, 3H) ppm; **<sup>13</sup>C NMR** (75.41 MHz, 23.0 °C, CDCl<sub>3</sub>): δ = 157.3, 148.4, 129.1, 128.8, 128.2, 127.3, 120.5, 117.3, 113.0, 110.2, 55.2, 43.4 ppm. **HRMS** (ESI) calcd. for C<sub>14</sub>H<sub>16</sub>NO [M+H]: 214.1232, found: 214.1233.

**N-(naphthalen-1-ylmethyl)aniline (C9):** The title compound was prepared according

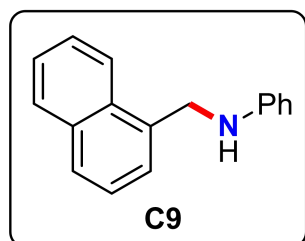

to the general procedure and purified by column chromatography to give a white solid 81 mg, 70% yield. Purification by column chromatography on silica gel (pentane/ethyl ether = 30 : 1, DCM 1%). **<sup>1</sup>H NMR** (299.86

MHz, 23.0 °C, CDCl<sub>3</sub>):  $\delta$  = 8.22-8.19 (m, 1H), 8.06-8.03 (m, 1H), 7.96 (d,  $J$  = 8.1 Hz, 1H), 7.68 – 7.64 (m, 3H), 7.59– 7.54 (m, 1H), 7.38 (t,  $J$  = 7.8 Hz, 2H), 6.94 (t,  $J$  = 7.3 Hz, 1H), 6.79 (d,  $J$  = 7.9 Hz, 2H), 4.81 (s, 2H), 4.04 (bs, 1H) ppm; <sup>13</sup>C NMR (75.41 MHz, 23.0 °C, CDCl<sub>3</sub>):  $\delta$  = 148.2, 134.3, 133.8, 131.5, 129.3, 128.7, 128.1, 126.3, 126.0, 125.8, 125.5, 123.5, 117.5, 112.7, 46.4 ppm. HRMS (ESI) calcd. for C<sub>17</sub>H<sub>16</sub>N [M+H]: 234.1283, found: 234.1284.

***N*-(naphthalen-1-ylmethyl)aniline (C10):** The title compound was prepared

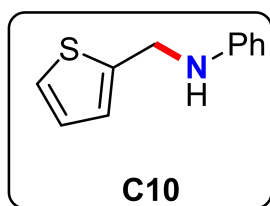

according to the general procedure and purified by column chromatography to give the yellow oil 76 mg, 80% yield. Purification by column chromatography on silica gel (pentane/ethyl ether = 20 : 1). <sup>1</sup>H NMR (299.86 MHz, 23.0 °C, CD<sub>2</sub>Cl<sub>2</sub>):  $\delta$  = 7.33 – 7.25 (m, 3H), 7.13 – 7.06 (m, 2H), 6.84 – 6.76 (m, 3H), 4.61 (s, 2H), 4.26 (bs, 1H) ppm; <sup>13</sup>C NMR (75.41 MHz, 23.0 °C, CD<sub>2</sub>Cl<sub>2</sub>):  $\delta$  = 147.8, 143.4, 129.2, 126.8, 125.0, 124.5, 117.9, 113.1, 43.3. HRMS (ESI) calcd. for C<sub>11</sub>H<sub>12</sub>NS [M+H]: 190.0690, found: 190.0692.

***N*-benzhydrylaniline (C11):** The title compound was prepared according to the

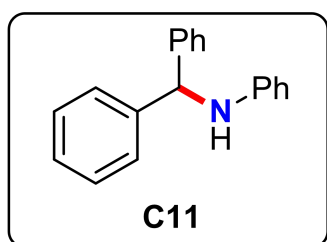

general procedure and purified by column chromatography to give a white solid 46 mg, 36% yield. Purification by column chromatography on silica gel (pentane/ethyl ether = 30 : 1, DCM 3%). <sup>1</sup>H NMR (299.86 MHz, 23.0 °C, CDCl<sub>3</sub>):  $\delta$  = 7.45-7.37 (m, 8H), 7.33 (d,  $J$  = 7.2 Hz, 2H),

7.21 – 7.17 (m, 2H), 6.79-6.75 (m, 1H), 6.62 – 6.60 (m, 2H), 5.58 (s, 1H), 4.29 (bs, 1H) ppm; <sup>13</sup>C NMR (75.41 MHz, 23.0 °C, CDCl<sub>3</sub>):  $\delta$  = 147.4, 142.9, 129.1, 128.8, 127.5, 127.4, 117.7, 113.5, 63.1 ppm. HRMS (ESI) calcd. for C<sub>19</sub>H<sub>18</sub>N [M+H]: 260.1439, found: 260.1437.

***N*-heptylaniline (C12):** The title compound was prepared according to the general procedure and purified by column chromatography to give a white solid 36 mg, 41%

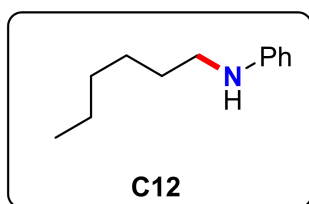

yield. Purification by column chromatography on silica gel (pentane/ethyl ether = 30 : 1).  $^1\text{H NMR}$  (299.86 MHz, 23.0 °C,  $\text{CD}_2\text{Cl}_2$ ):  $\delta$  = 7.22-7.17 (m, 2H), 6.73-6.68 (m, 1H), 6.66-6.63 (m, 2H), 3.70 (bs, 1H), 3.14 (t,  $J$  = 7.2 Hz, 2H), 1.68-1.64 (m, 2H), 1.46-1.38 (m, 6H), 1.00-0.96 (m, 3H) ppm;  $^{13}\text{C NMR}$  (75.41 MHz, 23.0 °C,  $\text{CD}_2\text{Cl}_2$ ):  $\delta$  = 148.8, 129.1, 116.8, 112.5, 43.9, 31.7, 29.5, 26.9, 22.7, 13.9 ppm. **HRMS** (ESI) calcd. for  $\text{C}_{12}\text{H}_{20}\text{N}$  [ $\text{M}+\text{H}$ ]: 178.1595, found: 178.15956.

***N*-(2-(6,6-dimethylbicyclo[3.1.1]heptan-2-yl)ethyl)aniline (C13):** The title

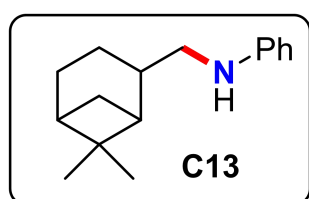

compound was prepared according to the general procedure and purified by column chromatography to give a white solid 61 mg, 53% yield. Purification by column chromatography on silica gel (pentane/ethyl ether = 30 : 1,

DCM 1%).  $^1\text{H NMR}$  (299.86 MHz, 23.0 °C,  $\text{CD}_2\text{Cl}_2$ ):  $\delta$  = 7.19 – 7.14 (m, 2H), 6.70-6.65 (m, 1H), 6.65 – 6.58 (m, 2H), 5.40 – 5.13 (m, 1H), 3.83 – 3.58 (m, 3H), 2.48 – 2.35 (m, 4H), 2.04-2.01 (m, 1H), 1.99 – 1.83 (m, 2H), 1.40 (d,  $J$  = 9.3 Hz, 1H), 1.38 (s, 1H), 1.31 (s, 2H), 0.79 (d,  $J$  = 4.5 Hz, 3H).  $^{13}\text{C NMR}$  (75.41 MHz, 23.0 °C,  $\text{CD}_2\text{Cl}_2$ ):  $\delta$  = 148.6, 145.8, 129.0, 118.6, 118.2, 116.9, 116.8, 112.7, 45.3, 41.2, 40.9, 40.8, 40.7, 40.5, 27.5, 26.0, 25.9, 25.7, 24.8, 23.7, 23.6, 21.7, 21.5, 19.7. **HRMS** (ESI) calcd. for  $\text{C}_{16}\text{H}_{24}\text{N}$  [ $\text{M}+\text{H}$ ]: 230.1909, found: 230.190.

***N*-(3,7-dimethyloct-6-en-1-yl)aniline (C14):** The title compound was prepared

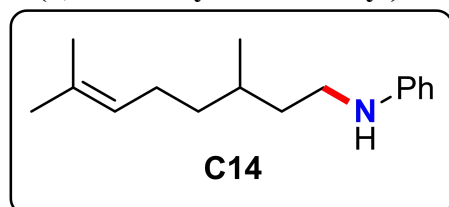

according to the general procedure and purified by column chromatography to give a white solid 46 mg, 40% yield. Purification by column

chromatography on silica gel (pentane/ethyl ether = 30 : 1, DCM 1%).  $^1\text{H NMR}$  (299.86 MHz, 23.0 °C,  $\text{CDCl}_3$ ):  $\delta$  = 7.22 (t,  $J$  = 7.9 Hz, 2H), 6.74 (td,  $J$  = 7.3, 0.8 Hz, 1H), 6.65 (d,  $J$  = 8.5 Hz, 2H), 5.16 (t,  $J$  = 7.1 Hz, 1H), 3.58 (bs, 1H), 3.29 – 3.01 (m, 2H), 2.06 (dt,  $J$  = 15.5, 7.8 Hz, 2H), 1.74 (d,  $J$  = 7.7 Hz, 3H), 1.72 – 1.56 (m, 5H), 1.46 (tdd,  $J$  = 11.9, 11.0, 7.0 Hz, 2H), 1.36 – 1.17 (m, 1H), 1.00 (d,  $J$  = 6.4 Hz, 3H);  $^{13}\text{C}$

**NMR** (75.41 MHz, 23.0 °C, CDCl<sub>3</sub>):  $\delta$  = 148.6, 131.3, 129.2, 124.7, 117.1, 112.71, 42.0, 37.1, 36.7, 30.5, 25.8, 25.5, 19.6, 17.7. **HRMS** (ESI) calcd. for C<sub>16</sub>H<sub>26</sub>N [M+H]: 232.2065, found: 232.2066.

**N-benzyl-4-chloroaniline (C15):** The title compound was prepared according to the

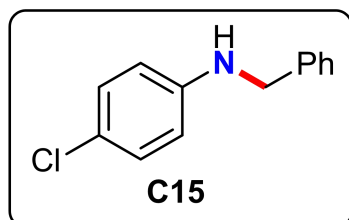

general procedure and purified by column chromatography to give the yellow oil 91 mg, 84% yield.

Purification by column chromatography on silica gel (pentane/ethyl ether = 20 : 1). **<sup>1</sup>H NMR** (299.86 MHz,

23.0 °C, CDCl<sub>3</sub>):  $\delta$  = 7.42 – 7.33 (m, 5H), 7.20 – 7.15 (m, 2H), 6.61 – 6.56 (m, 2H), 4.34 (s, 2H), 4.09 (bs, 1H) ppm; **<sup>13</sup>C NMR** (75.41 MHz, 23.0 °C, CDCl<sub>3</sub>):  $\delta$  = 146.5, 138.8, 128.9, 128.6, 127.3, 127.2, 121.9, 113.8, 48.2 ppm. **HRMS** (ESI) calcd. for C<sub>13</sub>H<sub>13</sub>ClN [M+H]: 218.0737, found: 218.0738.

**N-benzyl-4-bromoaniline (C16):** The title compound was prepared according to the

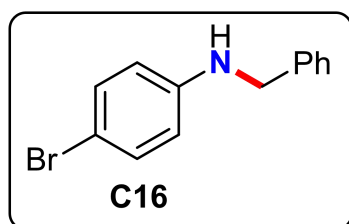

general procedure and purified by column chromatography to give the yellow oil 89 mg, 68% yield.

Purification by column chromatography on silica gel (pentane/ethyl ether = 20 : 1). **<sup>1</sup>H NMR** (299.86 MHz,

23.0 °C, CDCl<sub>3</sub>):  $\delta$  = 7.40 – 7.33 (m, 5H), 7.28 (d, *J* = 8.8 Hz, 2H), 6.53 (d, *J* = 8.8 Hz, 2H), 4.33 (s, 2H), 4.11 (bs, 1H) ppm; **<sup>13</sup>C NMR** (75.41 MHz, 23.0 °C, CDCl<sub>3</sub>):  $\delta$  = 147.0, 138.8, 131.8, 128.6, 127.3, 114.3, 109.0, 48.1 ppm. **HRMS** (ESI) calcd. for C<sub>13</sub>H<sub>13</sub>BrN [M+H]: 262.0231, found: 262.0233.

**N-benzyl-4-iodoaniline (C17):** The title compound was prepared according to the

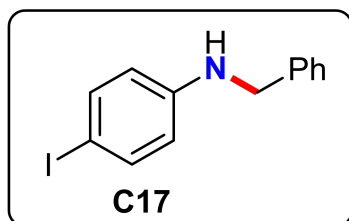

general procedure and purified by column chromatography to give a white solid 66 mg, 43% yield.

Purification by column chromatography on silica gel (pentane/ethyl ether = 20 : 1). **<sup>1</sup>H NMR** (299.86 MHz,

23.0 °C, CDCl<sub>3</sub>):  $\delta$  = 7.47 – 7.46 (m, 2H), 7.40 – 7.31 (m,



5H), 6.47 – 6.42 (m, 2H), 4.33 (d,  $J = 4.6$  Hz, 2H), 4.13 (bs, 1H) ppm;  $^{13}\text{C}$  NMR (75.41 MHz, 23.0 °C,  $\text{CDCl}_3$ ):  $\delta = 147.5, 138.2, 137.7, 128.2, 127.2, 127.3, 115.0, 78.0, 47.9$  ppm. HRMS (ESI) calcd. for  $\text{C}_{13}\text{H}_{13}\text{IN}$   $[\text{M}+\text{H}]$ : 310.0093, found: 310.0094.

**4-(benzylamino)benzonitrile (C18):** The title compound was prepared according to

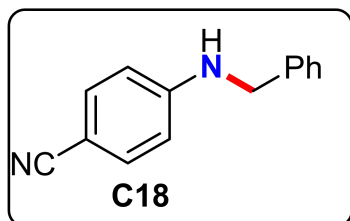

the general procedure and purified by column chromatography to give a white solid 27 mg, 26% yield. Purification by column chromatography on silica gel (pentane/ethyl ether = 20 : 1).  $^1\text{H}$  NMR (299.86 MHz,

23.0 °C,  $\text{CDCl}_3$ ):  $\delta = 7.41 - 7.40$  (m, 2H), 7.38-7.31 m, 5H), 6.59 (d,  $J = 8.8$  Hz, 2H), 4.66 (bs, 1H), 4.38 (d,  $J = 5.5$  Hz, 2H) ppm;  $^{13}\text{C}$  NMR (75.41 MHz, 23.0 °C,  $\text{CDCl}_3$ ):  $\delta = 151.1, 137.8, 133.8, 128.9, 127.7, 127.3, 120.2, 112.4, 98.5, 47.5$  ppm. HRMS (ESI) calcd. for  $\text{C}_{14}\text{H}_{13}\text{N}_2$   $[\text{M}+\text{H}]$ : 209.1079, found: 209.1077.

**N-benzyl-4-ethylaniline (C19):** The title compound was prepared according to the

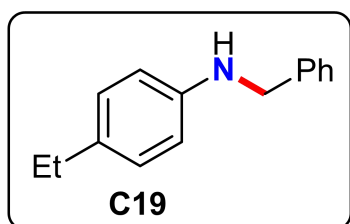

general procedure and purified by column chromatography to give the yellow oil 95 mg, 90% yield. Purification by column chromatography on silica gel (pentane/ethyl ether = 20 : 1).  $^1\text{H}$  NMR (299.86 MHz,

23.0 °C,  $\text{CDCl}_3$ ):  $\delta = 7.44 - 7.26$  (m, 5H), 7.09-7.06 (m, 2H), 6.66-6.62 (m, 2H), 4.35 (s, 2H), 3.95 (bs, 1H), 2.60 (q,  $J = 7.5$  Hz, 2H), 1.24 (t,  $J = 7.6$  Hz, 3H) ppm;  $^{13}\text{C}$  NMR (75.41 MHz, 23.0 °C,  $\text{CDCl}_3$ ):  $\delta = 146.1, 139.6, 133.3, 128.5, 128.5, 127.5, 127.1, 112.9, 48.6, 27.9, 15.9$  ppm. HRMS (ESI) calcd. for  $\text{C}_{15}\text{H}_{18}\text{N}$   $[\text{M}+\text{H}]$ : 212.1439, found: 212.1438.

**N-benzyl-2,5-dimethylaniline (C20):** The title compound was prepared according to

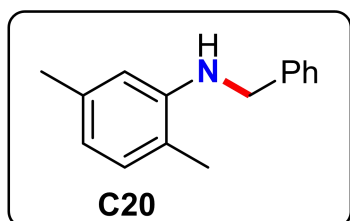

the general procedure and purified by column chromatography to give the yellow oil 106 mg, 71% yield. Purification by column chromatography on silica gel (pentane/ethyl ether = 20 : 1).  $^1\text{H}$  NMR (299.86 MHz,

23.0 °C, CDCl<sub>3</sub>):  $\delta$  = 7.48 – 7.43 (m, 4H), 7.39-7.36 (m, 1H), 6.51 (s, 1H), 6.38 (s, 2H), 4.39 (s, 2H), 3.97 (bs, 1H), 2.34(s, 6H) ppm; <sup>13</sup>C NMR (75.41 MHz, 23.0 °C, CDCl<sub>3</sub>):  $\delta$  = 148.3, 139.6, 138.8, 128.5, 127.5, 127.1, 119.5, 110.87, 48.3, 21.4 ppm. HRMS (ESI) calcd. for C<sub>15</sub>H<sub>18</sub>N [M+H]: 212.1439, found: 212.1440.

***N*-benzyl-3,5-dimethylaniline (C21):** The title compound was prepared according to

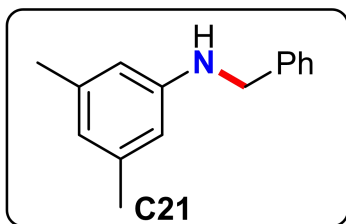

the general procedure and purified by column chromatography to give the yellow oil 87 mg, 83% yield. Purification by column chromatography on silica gel (pentane/ethyl ether = 20 : 1). <sup>1</sup>H NMR (299.86 MHz,

23.0 °C, CDCl<sub>3</sub>):  $\delta$  = 7.48 – 7.38 (m, 5H), 6.51 (d, *J* = 3.7 Hz, 1H), 6.39(d, *J* = 4.2 Hz, 2H), 4.39 (d, *J* = 4.2 Hz, 2H), 3.97 (bs, 1H), 2.35 (d, *J* = 4.0 Hz, 6H) ppm; <sup>13</sup>C NMR (75.41 MHz, 23.0 °C, CDCl<sub>3</sub>):  $\delta$  = 148.2, 139.6, 138.8, 128.5, 127.4, 127.1, 119.5, 110.7, 48.3, 21.4 ppm. HRMS (ESI) calcd. for C<sub>15</sub>H<sub>18</sub>N [M+H]: 212.1439, found: 212.1437.

***N*-benzyl-2-(*tert*-butyl)aniline (C22):** The title compound was prepared according to

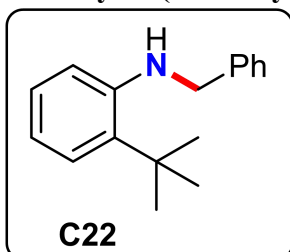

the general procedure and purified by column chromatography to give a white solid 69 mg, 58% yield. Purification by column chromatography on silica gel (pentane/ethyl ether = 30 : 1, DCM 1%). <sup>1</sup>H NMR (299.86

MHz, 23.0 °C, CDCl<sub>3</sub>):  $\delta$  = 7.60 – 7.28 (m, 6H), 7.17 (d, *J* = 6.4 Hz, 1H), 6.77 (dt, *J* = 14.4, 7.7 Hz, 2H), 4.47 (d, *J* = 6.3 Hz, 2H), 4.35 (s, 1H), 1.51 (d, *J* = 6.4 Hz, 9H) ppm; <sup>13</sup>C NMR (75.41 MHz, 23.0 °C, CDCl<sub>3</sub>):  $\delta$  = 146.1, 139.6, 133.2, 128.7, 127.4, 127.2, 126.2, 117.2, 111.9, 109.9, 109.9, 48.8, 34.5, 29.9 ppm. HRMS (ESI) calcd. for C<sub>17</sub>H<sub>22</sub>N [M+H]: 240.1752, found: 240.1753.

***N*-benzyl-[1,1'-biphenyl]-2-amine (C23):** The title compound was prepared according to the general procedure and purified by column chromatography to give a white solid 91 mg, 70% yield. Purification by column chromatography on silica gel (pentane/ethyl

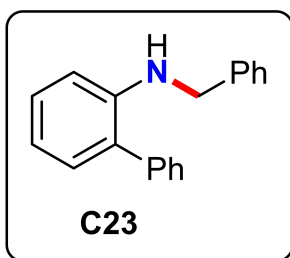

ether = 6 : 1, DCM 10%). **<sup>1</sup>H NMR** (299.86 MHz, 23.0 °C, CDCl<sub>3</sub>): δ = 7.78 – 7.67 (m, 4H), 7.61 – 7.40 (m, 8H), 7.06 (t, *J* = 7.3 Hz, 1H), 6.92 (d, *J* = 8.1 Hz, 1H), 4.69 (bs, 1H), 4.55 (s, 2H) ppm; **<sup>13</sup>C NMR** (75.41 MHz, 23.0 °C, CDCl<sub>3</sub>): δ = 145.2, 139.8, 130.5, 129.7, 129.2, 129.0, 128.9, 127.9, 127.6, 127.3, 117.5, 111.1, 48.3 ppm. **HRMS** (ESI) calcd. for C<sub>19</sub>H<sub>18</sub>N [M+H]: 260.1439, found: 260.1440.

***N*-benzyl-4-methoxyaniline (C24):** The title compound was prepared according to the

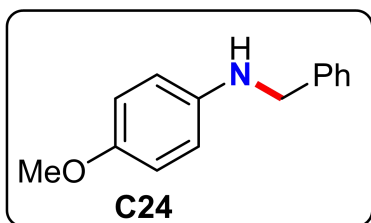

general procedure and purified by column chromatography to give a white solid 96 mg, 90% yield. Purification by column chromatography on silica gel (pentane/ethyl ether = 30 : 1, DCM 1%). **<sup>1</sup>H NMR** (299.86 MHz, 23.0 °C, CDCl<sub>3</sub>): δ = 7.41 – 7.34 (m, 4H), 7.31 – 7.29 (m, 1H), 6.81 – 6.79 (m, 2H), 6.64 – 6.62 (m, 2H), 4.30 (s, 2H), 3.76 (s, 3H) ppm; **<sup>13</sup>C NMR** (75.41 MHz, 23.0 °C, CDCl<sub>3</sub>): δ = 152.3, 142.3, 139.6, 128.6, 127.6, 127.2, 114.9, 114.2, 55.8, 49.3 ppm. **HRMS** (ESI) calcd. for C<sub>14</sub>H<sub>16</sub>NO [M+H]: 214.1232, found: 214.1232.

***N*-benzyl-3-methoxyaniline (C25):** The title compound was prepared according to the

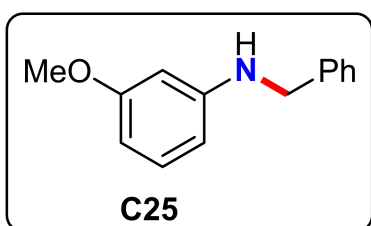

general procedure and purified by column chromatography to give a white solid 81 mg, 76% yield. Purification by column chromatography on silica gel (pentane/ethyl ether = 30 : 1, DCM 1%). **<sup>1</sup>H NMR** (299.86 MHz, 23.0 °C, CDCl<sub>3</sub>): δ = 7.43 – 7.33 (m, 5H), 7.14 (t, *J* = 8.1 Hz, 1H), 6.36 – 6.25 (m, 2H), 6.24 (t, *J* = 2.3 Hz, 1H), 4.35 (s, 2H), 4.14 (bs, 1H), 3.80 (s, 3H) ppm; **<sup>13</sup>C NMR** (75.41 MHz, 23.0 °C, CDCl<sub>3</sub>): δ = 160.9, 149.6, 139.4, 130.1, 128.7, 127.6, 127.3, 106.1, 102.8, 99.0, 55.1, 48.4 ppm. **HRMS** (ESI) calcd. for C<sub>14</sub>H<sub>16</sub>NO [M+H]: 214.1232, found: 214.1235.

***N*-benzyl-4-(thiophen-2-yl)aniline (C26):** The title compound was prepared according to the general procedure and purified by column chromatography to give a

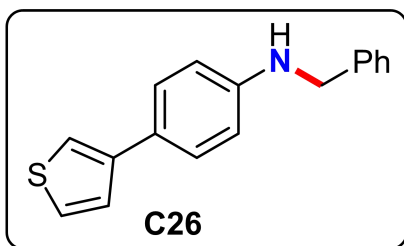

white solid 110 mg, 83% yield. Purification by column chromatography on silica gel (pentane/ethyl ether = 20 : 1, DCM 10%).  $^1\text{H NMR}$  (299.86 MHz, 23.0 °C,  $\text{CD}_2\text{Cl}_2$ ):  $\delta$  = 7.46 – 7.28 (m, 10H), 6.69 (d,  $J$  = 8.0 Hz, 2H), 4.39 (s, 2H), 4.20 (bs, 1H) ppm;  $^{13}\text{C}$

$\text{NMR}$  (75.41 MHz, 23.0 °C,  $\text{CD}_2\text{Cl}_2$ ):  $\delta$  = 147.3, 142.5, 139.2, 128.6, 127.4, 127.4, 127.2, 126.1, 125.7, 125.56, 117.7, 113.0, 109.9, 109.9, 48.2 ppm. **HRMS** (ESI) calcd. for  $\text{C}_{17}\text{H}_{16}\text{NS}$  [ $\text{M}+\text{H}$ ]: 266.1003, found: 266.1005.

**(*E*)-*N*-benzyl-4-styrylaniline (C27):** The title compound was prepared according to

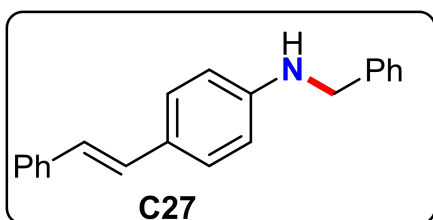

the general procedure and purified by column chromatography to give a white solid 94 mg, 66% yield. Purification by column chromatography on silica gel (pentane/ethyl ether = 20 : 1, DCM 10%).

$^1\text{H NMR}$  (299.86 MHz, 23.0 °C,  $\text{CDCl}_3$ ):  $\delta$  = 7.50 (d,  $J$  = 7.7 Hz, 2H), 7.43 – 7.20 (m, 10H), 7.00 (dd,  $J$  = 39.8, 16.2 Hz, 2H), 6.66 (d,  $J$  = 8.3 Hz, 2H), 4.39 (s, 2H), 4.24 (bs, 1H) ppm;  $^{13}\text{C NMR}$  (75.41 MHz, 23.0 °C,  $\text{CDCl}_3$ ):  $\delta$  = 147.8, 139.1, 138.1, 128.8, 128.7, 128.6, 127.8, 127.5, 127.3, 127.1, 126.8, 126.6, 124.6, 113.0, 48.2 ppm. **HRMS** (ESI) calcd. for  $\text{C}_{21}\text{H}_{20}\text{N}$  [ $\text{M}+\text{H}$ ]: 286.1596, found: 286.1597.

***N*-benzyl-5-bromopyridin-2-amine (C28):** The title compound was prepared

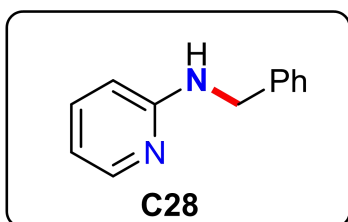

according to the general procedure and purified by column chromatography to give a white solid 69 mg, 75% yield. Purification by column chromatography on silica gel (pentane/ethyl ether = 5 : 1, DCM 10%).  $^1\text{H}$

$\text{NMR}$  (299.86 MHz, 23.0 °C,  $\text{CDCl}_3$ ):  $\delta$  = 8.08 (d,  $J$  = 4.4 Hz, 1H), 7.48 – 7.28 (m, 5H), 7.27 – 7.17 (m, 1H), 6.63 – 6.50 (m, 1H), 6.35 (d,  $J$  = 8.4 Hz, 1H), 4.92 (s, 1H), 4.48 (d,  $J$  = 5.7 Hz, 2H) ppm;  $^{13}\text{C NMR}$  (75.41 MHz, 23.0 °C,  $\text{CDCl}_3$ ):  $\delta$  = 158.5, 148.2, 139.0, 137.4, 128.6, 127.4, 113.1, 106.8, 46.3. ppm. **HRMS** (ESI) calcd. for  $\text{C}_{12}\text{H}_{13}\text{N}_2$  [ $\text{M}+\text{H}$ ]: 185.1079, found: 185.1080.

***N*-benzyl-5-bromopyridin-2-amine (C29):** The title compound was prepared

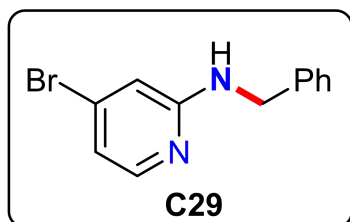

according to the general procedure and purified by column chromatography to give a white solid 78 mg, 60% yield. Purification by column chromatography on silica gel (pentane/ethyl ether = 5 : 1, DCM 10%). <sup>1</sup>H

**NMR** (299.86 MHz, 23.0 °C, CDCl<sub>3</sub>): δ = 8.01 (d, *J* = 2.3 Hz, 1H), 7.37 (dd, *J* = 8.8, 2.5 Hz, 1H), 7.29 – 7.03 (m, 5H), 6.20 (d, *J* = 8.9 Hz, 1H), 4.99 (s, 1H), 4.39 (d, *J* = 5.8 Hz, 2H) ppm; <sup>13</sup>C **NMR** (75.41 MHz, 23.0 °C, CDCl<sub>3</sub>): δ = 157.1, 148.7, 139.7, 138.6, 128.7, 127.4, 127.3, 108.2, 107.2, 46.3 ppm. **HRMS** (ESI) calcd. for C<sub>12</sub>H<sub>12</sub>BrN<sub>2</sub> [M+H]: 263.0184, found: 263.0185.

***N*-benzylpyridin-2-amine (C30):** The title compound was prepared according to the

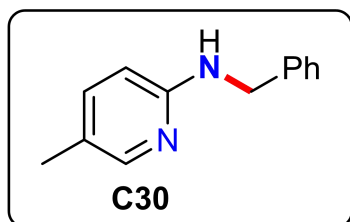

general procedure and purified by column chromatography to give a white solid 72 mg, 73% yield. Purification by column chromatography on silica gel (pentane/ethyl ether = 5 : 1, DCM 10%). <sup>1</sup>H **NMR**

(299.86 MHz, 23.0 °C, CDCl<sub>3</sub>): δ = 7.84 (d, *J* = 5.2 Hz, 1H), 7.40 – 7.02 (m, 5H), 6.49 – 6.27 (m, 1H), 6.09 (s, 1H), 4.95 (bs, 1H), 4.38 (d, *J* = 5.7 Hz, 2H), 2.10 (s, 3H) ppm; <sup>13</sup>C **NMR** (75.41 MHz, 23.0 °C, CDCl<sub>3</sub>): δ = 158.8, 148.3, 147.7, 139.3, 128.5, 127.3, 127.0, 114.6, 114.6, 106.9, 106.8, 46.2, 21.1 ppm. **HRMS** (ESI) calcd. for C<sub>13</sub>H<sub>15</sub>N<sub>2</sub> [M+H]: 199.1235, found: 199.1238.

***N*-benzylpyridin-3-amine (C31):** The title compound was prepared according to the

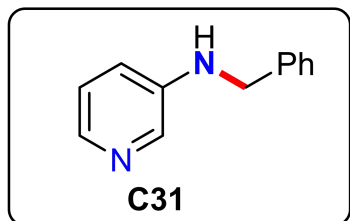

general procedure and purified by column chromatography to give a white solid 75 mg, 81% yield. Purification by column chromatography on silica gel (pentane/ethyl ether = 5 : 1, DCM 10%). <sup>1</sup>H **NMR**

(299.86 MHz, 23.0 °C, CD<sub>2</sub>Cl<sub>2</sub>): δ = 8.07 (d, *J* = 2.9 Hz, 1H), 7.94 (dd, *J* = 4.6, 1.3 Hz, 1H), 7.48 – 7.20 (m, 5H), 7.08 (dd, *J* = 8.3, 4.6 Hz, 1H), 6.93-6.89 (m, 1H), 4.40 (br,

3H) ppm;  $^{13}\text{C}$  NMR (75.41 MHz, 23.0 °C,  $\text{CD}_2\text{Cl}_2$ ):  $\delta$  = 143.7, 138.5, 138.2, 135.7, 128.2, 126.9, 126.86, 123.1, 117.9, 47.2 ppm. HRMS (ESI) calcd. for  $\text{C}_{12}\text{H}_{13}\text{N}_2$  [M+H]: 185.1079, found: 185.1078.

***N*-(4-methylbenzyl)pyridin-3-amine (C33):** The title compound was prepared

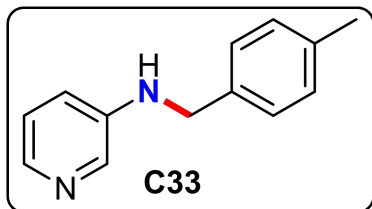

according to the general procedure and purified by column chromatography to give a white solid 80 mg, 81% yield. Purification by column chromatography on silica gel (pentane/ethyl ether = 30 : 1, DCM 1%).  $^1\text{H}$

NMR (299.86 MHz, 23.0 °C,  $\text{CD}_2\text{Cl}_2$ ):  $\delta$  = 8.05 (dd,  $J$  = 2.9, 0.5 Hz, 1H), 7.93 (dd,  $J$  = 4.6, 1.4 Hz, 1H), 7.41 – 7.23 (m, 2H), 7.19 (dd,  $J$  = 7.0, 1.4 Hz, 2H), 7.07 (ddd,  $J$  = 8.3, 4.7, 0.7 Hz, 1H), 6.92-6.88 (m, 1H), 4.32 (s, 3H), 2.36 (s, 3H). ppm;  $^{13}\text{C}$  NMR (75.41 MHz, 23.0 °C,  $\text{CD}_2\text{Cl}_2$ ):  $\delta$  = 144.2, 138.5, 137.1, 136.1, 135.7, 129.3, 127.3, 123.5, 118.3, 47.4, 20.8 ppm. HRMS (ESI) calcd. for  $\text{C}_{13}\text{H}_{15}\text{N}_2$  [M+H]: 199.1235, found: 199.1238.

***N*-(4-methoxybenzyl)pyridin-3-amine (C34):** The title compound was prepared

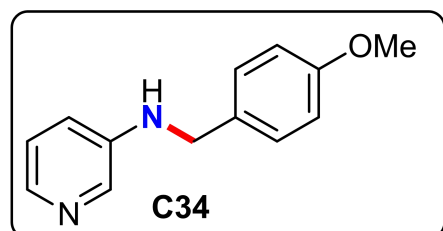

according to the general procedure and purified by column chromatography to give a white solid 88 mg, 82% yield. Purification by column chromatography on silica gel (pentane/ethyl ether

= 30 : 1, DCM 1%).  $^1\text{H}$  NMR (299.86 MHz, 23.0 °C,  $\text{CD}_2\text{Cl}_2$ ):  $\delta$  = 8.05 (d,  $J$  = 2.0 Hz, 1H), 7.93 (d,  $J$  = 4.3 Hz, 1H), 7.43 – 7.23 (m, 2H), 7.08 (dd,  $J$  = 8.2, 4.6 Hz, 1H), 6.98 – 6.80 (m, 3H), 4.29 (s, 3H), 3.81 (s, 3H) ppm;  $^{13}\text{C}$  NMR (75.41 MHz, 23.0 °C,  $\text{CD}_2\text{Cl}_2$ ):  $\delta$  = 159.0, 138.5, 136.1, 130.7, 128.6, 123.5, 118.3, 114.0, 47.1 ppm. HRMS (ESI) calcd. for  $\text{C}_{13}\text{H}_{15}\text{N}_2\text{O}$  [M+H]: 215.1184, found: 215.1184.

***N*-(4-(methylthio)benzyl)pyridin-3-amine (C35):** The title compound was prepared according to the general procedure and purified by column chromatography to give a white solid 91 mg, 79% yield. Purification by column chromatography on silica gel

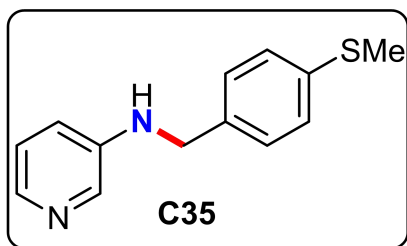

(pentane/ethyl ether = 30 : 1, DCM 1%). **<sup>1</sup>H NMR** (299.86 MHz, 23.0 °C, CD<sub>2</sub>Cl<sub>2</sub>): δ = 8.05 (s, 1H), 7.93 (d, *J* = 4.4 Hz, 1H), 7.45 – 7.17 (m, 4H), 7.07 (dd, *J* = 8.2, 4.6 Hz, 1H), 6.97 – 6.70 (m, 1H), 4.37-4.33 (m, 3H), 2.49 (d, *J* = 1.1 Hz, 3H) ppm; **<sup>13</sup>C**

**NMR** (75.41 MHz, 23.0 °C, CD<sub>2</sub>Cl<sub>2</sub>): δ = 138.7, 137.6, 136.1, 135.6, 127.9, 126.7, 123.5, 118.3, 47.2, 15.6 ppm. **HRMS** (ESI) calcd. for C<sub>13</sub>H<sub>15</sub>N<sub>2</sub>S [M+H]: 231.0956, found: 231.0956.

***N*-(4-chlorobenzyl)-4-iodoaniline (C36)**: The title compound was prepared according

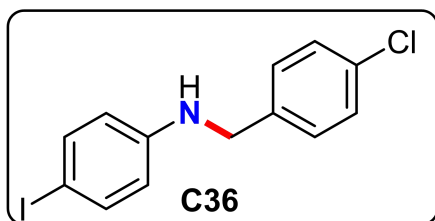

to the general procedure and purified by column chromatography to give a white solid 68 mg, 40% yield. Purification by column chromatography on silica gel (pentane/ethyl ether = 30 : 1, DCM 1%).

**<sup>1</sup>H NMR** (299.86 MHz, 23.0 °C, CDCl<sub>3</sub>): δ = 7.46 – 7.43 (m, 2H), 7.39 – 7.33 (m, 4H), 6.47 – 6.44 (m, 2H), 4.34 (s, 3H) ppm; **<sup>13</sup>C NMR** (75.41 MHz, 23.0 °C, CDCl<sub>3</sub>): δ = 147.9, 138.1, 132.9, 129.4, 128.8, 128.7, 117.8, 112.9, 47.6 ppm. **HRMS** (ESI) calcd. for C<sub>13</sub>H<sub>12</sub>ClIN [M+H]: 343.9703, found: 343.9704.

***(E)*-N-(4-chlorobenzyl)-4-styrylaniline (C37)**: The title compound was prepared

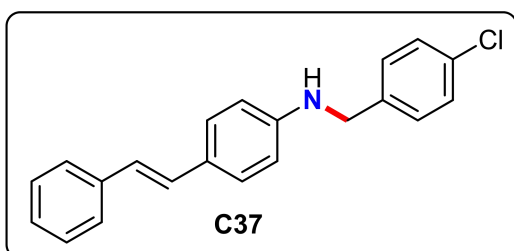

according to the general procedure and purified by column chromatography to give a white solid 113 mg, 71% yield. Purification by column chromatography on

silica gel (pentane/ethyl ether = 30 : 1, DCM 1%). **<sup>1</sup>H NMR** (299.86 MHz, 23.0 °C, CDCl<sub>3</sub>): δ = 7.53 – 7.52 (m, 2H), 7.41 – 7.28 (m, 8H), 7.25-7.10 (m, 1H), 7.01 (dd, *J* = 38.0, 16.3 Hz, 2H), 6.64 (d, *J* = 8.4 Hz, 2H), 4.38 (s, 2H), 4.21 (bs, 1H) ppm; **<sup>13</sup>C** **NMR** (75.41 MHz, 23.0 °C, CDCl<sub>3</sub>): δ = 147.4, 138.0, 137.7, 132.9, 128.8, 128.6, 128.6, 127.7, 126.8, 126.0, 124.7, 112.9, 47.4 ppm. **HRMS** (ESI) calcd. for C<sub>21</sub>H<sub>19</sub>ClN [M+H]: 320.1206, found: 320.1203.

***N*<sup>1</sup>-hexyl-*N*<sup>3</sup>-(4-methoxybenzyl)benzene-1,3-diamine (C38):** The title compound was

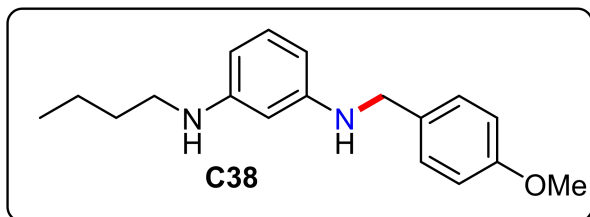

prepared according to the general procedure and purified by column chromatography to give a white solid 104 mg, 73% yield. Purification by

column chromatography on silica gel (pentane/ethyl ether = 30 : 1, DCM 1%). <sup>1</sup>H NMR (299.86 MHz, 23.0 °C, CD<sub>2</sub>Cl<sub>2</sub>): δ = 7.34 – 7.31 (m, 2H), 6.97 – 6.90 (m, 3H), 6.03 – 5.99 (m, 2H), 5.90 (t, *J* = 2.2 Hz, 1H), 4.25 (s, 2H), 3.82 (s, 3H), 3.08 (t, *J* = 7.0 Hz, 2H), 1.62 – 1.57 (m, 2H), 1.48 – 1.40 (m, 2H), 0.98 (t, *J* = 7.3 Hz, 3H) ppm; <sup>13</sup>C NMR (75.41 MHz, 23.0 °C, CD<sub>2</sub>Cl<sub>2</sub>): δ = 158.8, 149.9, 149.5, 131.9, 129.7, 128.6, 113.8, 102.7, 102.4, 96.9, 55.2, 47.6, 43.6, 31.7, 20.3, 13.7 ppm. HRMS (ESI) calcd. for C<sub>18</sub>H<sub>25</sub>N<sub>2</sub>O [M+H]: 285.1967, found: 285.1966.

***N*<sup>1</sup>,*N*<sup>3</sup>-dibenzylbenzene-1,3-diamine (C39):** The title compound was prepared

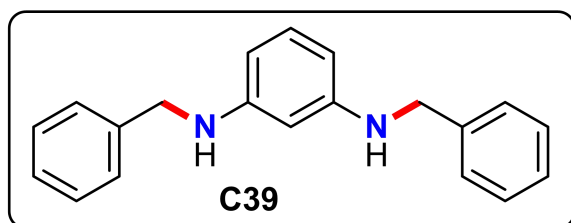

according to the general procedure and purified by column chromatography to give a white solid 95 mg, 66% yield.

Purification by column chromatography on silica gel (pentane/ethyl ether = 30 : 1, DCM 1%). <sup>1</sup>H NMR (299.86 MHz, 23.0 °C, CD<sub>2</sub>Cl<sub>2</sub>): δ = 7.40-7.27 (m, 10H), 6.95 (t, *J* = 8.0 Hz, 1H), 6.05 (dd, *J* = 8.0, 2.1 Hz, 2H), 5.94 (t, *J* = 2.1 Hz, 1H), 4.30 (d, *J* = 3.5 Hz, 4H), 4.07 (bs, 2H) ppm; <sup>13</sup>C NMR (75.41 MHz, 23.0 °C, CD<sub>2</sub>Cl<sub>2</sub>): δ = 149.4, 140.0, 129.8, 128.5, 127.4, 127.0, 102.9, 97.2, 48.1 ppm. HRMS (ESI) calcd. for C<sub>20</sub>H<sub>21</sub>N<sub>2</sub> [M+H]: 289.1705, found: 289.1707.



## 5. Gram scale experiments

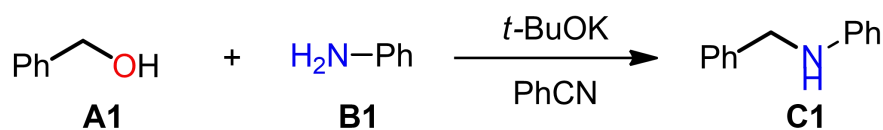

### Open system:

**10 mmol Scale:** Using a nitrogen-filled glove box, an oven-dried Schlenk tube (250 mL volume) was charged with a magnetic stirring bar, *t*-BuOK (16 mmol, 1.79 g), benzyl alcohol **A1** (20 mmol), aniline **B1** (10 mmol), benzonitrile (16 mmol) and 1,4-dioxane (80 mL). The tube was sealed, taken out of the glove box and a reflux condenser was attached under argon stream. The mixture was heated to a gentle reflux for 24 hours under inert atmosphere in an open system at 120 °C (oil bath). After cooling, quenched with half-saturated brine and extracted with dichloromethane (4 x 200 mL). The combined organic phase was dried over Na<sub>2</sub>SO<sub>4</sub> and concentrated. Then the corresponding reaction mixture was purified by flash column chromatography on a silica gel column (pentane/ethyl ether = 10/1) to give the desired product **C1** in 80.0 % yield (1.47 g).

### 100 mmol Scale:

Using a nitrogen-filled glove box, an oven-dried flask (2.5 L volume) was charged with a magnetic stirring bar, *t*-BuOK (160 mol, 17.9 g), benzyl alcohol **A1** (200 mmol), aniline **B1** (100 mmol), benzonitrile (160 mmol) and 1,4-dioxane (0.5 L). The flask was sealed, taken out of the glove box and a reflux condenser was attached under argon stream. The mixture was heated to a gentle reflux for 48 hours under inert atmosphere in an open system at 120 °C (oil bath). After cooling, quenched with half-saturated brine and extracted with dichloromethane (4 x 1 L). The combined organic phase was dried over Na<sub>2</sub>SO<sub>4</sub> and concentrated. Then the corresponding reaction mixture was purified by recrystallized to give the desired product **C1** (pentane/diethyl ether at the -10 °C) in 70.99 % yield (13.01 g).

### 1000 mmol Scale:

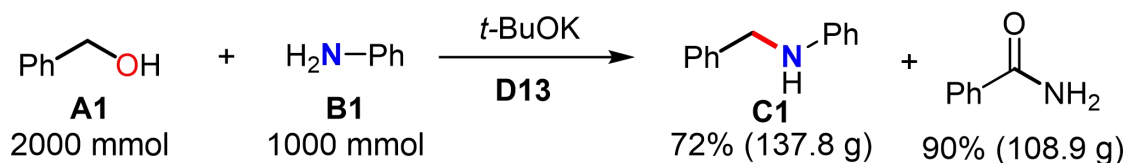

Under nitrogen, an oven-dried flask (25 L volume) was charged with a magnetic stirring bar, *t*-BuOK (1600 mol, 179 g), benzyl alcohol **A1** (2000 mmol), aniline **B1** (1000 mmol), benzonitrile (1600 mmol) and 1,4-dioxane (5 L). The flask was sealed and was put into the autoclave under argon stream. Then the mixture was stirred at 120 °C for 72 hours under inert atmosphere. After cooling, quenched with half-saturated brine and extracted with dichloromethane (4 x 1 L). The combined organic phase was dried over Na<sub>2</sub>SO<sub>4</sub> and concentrated. Then the corresponding reaction mixture was purified by recrystallized three times to give the desired benzamide product (DCM/diethyl ether at 0 °C) in 90 % yield (108.9 g).

Hereafter, the combined organic phase concentrated and was purified by recrystallized three times to give the desired amine product **C1** (diethyl ether/hexane at -30 °C) in 72 % yield (137.8 g).

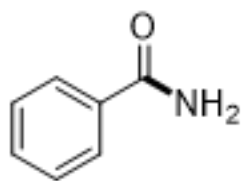

**Benzamide (CAS: 55-21-0):** a white solid 108.9 mg, 90% yield.

**Melting Point** (°C): 127–128 °C. **<sup>1</sup>H NMR** (500 MHz, CDCl<sub>3</sub>):

δ = 7.82 (d, *J* = 7.3 Hz, 2H), 7.51 (d, *J* = 6.8 Hz, 1H), 7.43 (t, *J* =

7.3 Hz, 2H), 6.33 (bs, 2H) ppm; **<sup>13</sup>C NMR** (100 MHz, CDCl<sub>3</sub>): δ

= 169.7, 133.4, 131.9, 128.6, 127.3, 81.6 ppm. **HRMS** (ESI) calcd. for C<sub>7</sub>H<sub>8</sub>NO [M+H]: 122.0606, found: 122.0608.

## 6. Synthesis of C40

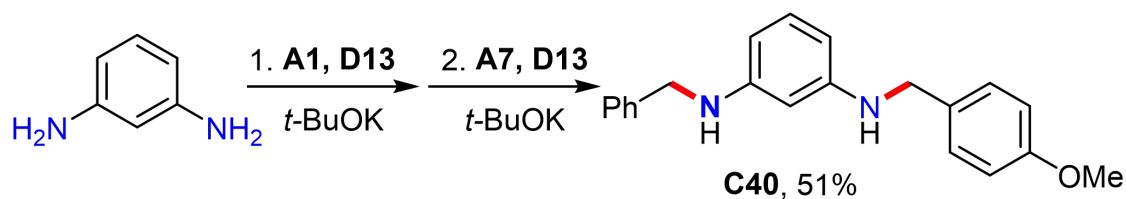

Using a nitrogen-filled glove box, an oven-dried pressure tube (38 mL volume) was charged with a magnetic stirring bar, *t*-BuOK (0.8 mmol), **A1** (1.0 mmol), benzene-1,3-diamine (0.6 mmol), **D13** (0.8 mmol) and 1,4-dioxane (2.0 mL). Then the seal tube was closed tightly with a teflon cap, removed from the glove box and immersed into a pre-heated oil bath (120 °C). After 15 hours the reaction was cooled, **A7** (1.0 mmol), **D13** (0.8 mmol) and 1,4-dioxane (2.0 mL) were added into the reaction mixture. Then the seal tube was closed tightly with a teflon cap, removed from the glove box and immersed into a pre-heated oil bath (120 °C). After another 15 hours the reaction was cooled, quenched with half-saturated brine and extracted with dichloromethane (4 x 15 mL). The combined organic phase was dried over Na<sub>2</sub>SO<sub>4</sub> and concentrated. A small aliquot of the organic phase was analyzed by GC or GC-MS to monitor products formation. Purification of the remainder by column chromatography on silica gel gave the corresponding products **C40** (pentane/ethyl ether = 15/1 – 5/1) in the reported yield.

***N*<sup>1</sup>-benzyl-*N*<sup>3</sup>-(4-methoxybenzyl)benzene-1,3-diamine (C40):** The title compound was prepared according to the general procedure and purified by column chromatography to give a white solid 83 mg, 51% yield. Purification by column chromatography on silica gel (pentane/ethyl ether = 30 : 1, DCM 3%). <sup>1</sup>H NMR (299.86 MHz, 23.0 °C, CD<sub>2</sub>Cl<sub>2</sub>): δ = 7.39 (dd, *J* = 7.2, 4.1 Hz, 4H), 7.30 (d, *J* = 8.4 Hz, 3H), 7.11 – 6.79 (m, 3H), 6.05 (dd, *J* = 8.0, 2.2 Hz, 2H), 5.94 (t, *J* = 1.8 Hz, 1H), 4.31 (s, 2H), 4.23 (s, 2H), 4.04 (s, 2H), 3.82 (s, 3H) ppm; <sup>13</sup>C NMR (75.41 MHz, 23.0 °C, CD<sub>2</sub>Cl<sub>2</sub>): δ = 158.8, 149.5, 149.4, 140.0, 131.9, 129.8, 128.7, 128.5, 128.4, 127.4, 127.0, 113.8, 102.9, 102.8, 97.2, 55.2, 48.1, 47.5 ppm. HRMS (ESI) calcd. for C<sub>21</sub>H<sub>23</sub>N<sub>2</sub>O [M+H]: 319.1810, found: 319.1812.

## 7. Mechanistic investigations

### 7.1 Control experiments

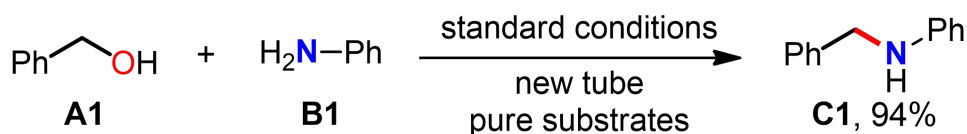

| Entry | Reaction condition                                   | C1 (%) |
|-------|------------------------------------------------------|--------|
| 1     | New seal tube, 99.99% <i>t</i> -BuOK -               | 94     |
| 2     | New seal tube, 99.99% <i>t</i> -BuOK Pure substrates | 93     |
| 3     | New seal tube -                                      | 0      |
| 4     | New seal tube H <sub>2</sub> O (0.8 mmol)            | <5     |

Using a nitrogen-filled glove box, an oven-dried new pressure tube (38 mL volume) was charged with a magnetic stirring bar, *t*-BuOK (0.8 mmol), **A1** (1.0 mmol), **B1** (0.5 mmol), **D13** (0.8 mmol) and 1,4-dioxane (2.0 mL). Then the seal tube was closed tightly with a teflon cap, removed from the glove box and immersed into a pre-heated oil bath (120 °C). After 15 hours the reaction was cooled, quenched with half-saturated brine and extracted with dichloromethane (4 x 15 mL). The combined organic phase was dried over Na<sub>2</sub>SO<sub>4</sub> and concentrated. A small aliquot of the organic phase was analyzed by GC or GC-MS to monitor products formation.

### 7.2 Control experiments with 18-crown-6 additive

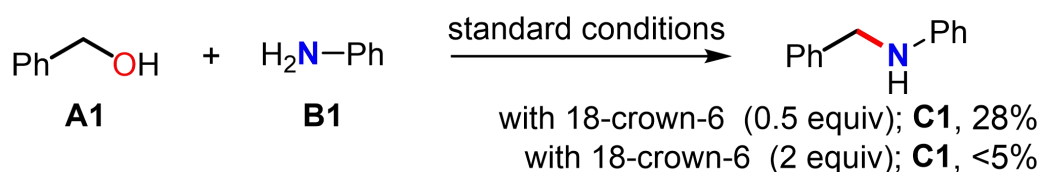

Using a nitrogen-filled glove box, an oven-dried new pressure tube (38 mL volume) was charged with a magnetic stirring bar, *t*-BuOK (0.8 mmol), **A1** (1.0 mmol), **B1** (0.5 mmol), **D13** (0.8 mmol), 18-crown-6 and 1,4-dioxane (2.0 mL). Then the seal tube was closed tightly with a teflon cap, removed from the glove box and immersed into a pre-heated oil bath (120 °C). After 15 hours the reaction was cooled, quenched with half-saturated brine and extracted with dichloromethane (4 x 15 mL). The combined

organic phase was dried over Na<sub>2</sub>SO<sub>4</sub> and concentrated. A small aliquot of the organic phase was analyzed by GC or GC-MS to monitor products formation.

### 7.3 Control experiments with radical scavenger

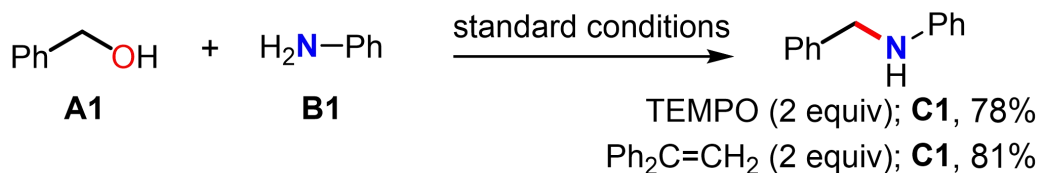

Using a nitrogen-filled glove box, an oven-dried new pressure tube (38 mL volume) was charged with a magnetic stirring bar, *t*-BuOK (0.8 mmol), **A1** (1.0 mmol), **B1** (0.5 mmol), **D13** (0.8 mmol), additives (1.0 mmol) and 1,4-dioxane (2.0 mL). Then the seal tube was closed tightly with a teflon cap, removed from the glove box and immersed into a pre-heated oil bath (120 °C). After 15 hours the reaction was cooled, quenched with half-saturated brine and extracted with dichloromethane (4 x 15 mL). The combined organic phase was dried over Na<sub>2</sub>SO<sub>4</sub> and concentrated. A small aliquot of the organic phase was analyzed by GC or GC-MS to monitor products formation.

### 7.4 Isolated the intermediate E1

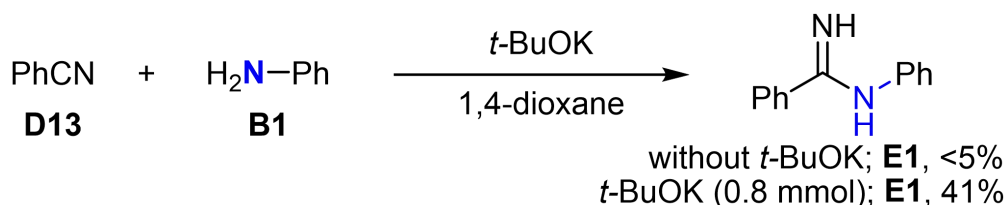

Using a nitrogen-filled glove box, an oven-dried new pressure tube (38 mL volume) was charged with a magnetic stirring bar, *t*-BuOK (0.8 mmol), **B1** (0.6 mmol), **D13** (0.5 mmol) and 1,4-dioxane (2.0 mL). Then the seal tube was closed tightly with a teflon cap, removed from the glove box and immersed into a pre-heated oil bath (120 °C). After 15 hours the reaction was cooled, quenched with half-saturated brine and extracted with dichloromethane (4 x 15 mL). The combined organic phase was dried over Na<sub>2</sub>SO<sub>4</sub> and concentrated. A small aliquot of the organic phase was analyzed by GC or GC-MS to monitor products formation. Purification of the remainder by column

chromatography on silica gel gave the corresponding products **E1** (pentane/ethyl ether = 5/1) in the reported yield.

### 7.5 The reaction of **E1** with alcohols

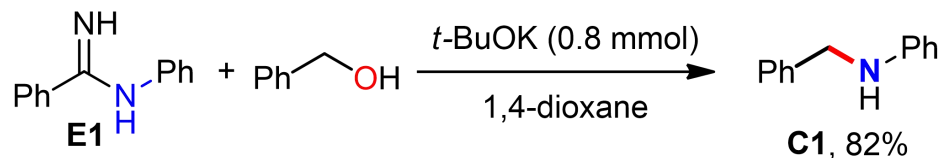

Using a nitrogen-filled glove box, an oven-dried new pressure tube (38 mL volume) was charged with a magnetic stirring bar, *t*-BuOK (0.8 mmol), **A1** (1.0 mmol), **E1** (0.5 mmol) and 1,4-dioxane (2.0 mL). Then the seal tube was closed tightly with a teflon cap, removed from the glove box and immersed into a pre-heated oil bath (120 °C). After 15 hours the reaction was cooled, quenched with half-saturated brine and extracted with dichloromethane (4 x 15 mL). The combined organic phase was dried over Na<sub>2</sub>SO<sub>4</sub> and concentrated. A small aliquot of the organic phase was analyzed by GC or GC-MS to monitor products formation.

### 7.6 The cascade reaction

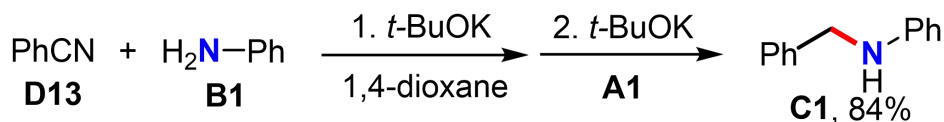

Using a nitrogen-filled glove box, an oven-dried new pressure tube (38 mL volume) was charged with a magnetic stirring bar, *t*-BuOK (0.8 mmol), **A1** (1.0 mmol), **B1** (0.5 mmol), **D13** (0.8 mmol) and 1,4-dioxane (2.0 mL). Then the seal tube was closed tightly with a teflon cap, removed from the glove box and immersed into a pre-heated oil bath (120 °C). After 15 hours the reaction was cooled, **A1** (1.0 mmol) was added into the reaction mixture under the glove box. Then the seal tube was closed tightly with a teflon cap, removed from the glove box and immersed into a pre-heated oil bath (120 °C). After 15 hours the reaction was cooled, quenched with half-saturated brine and extracted with dichloromethane (4 x 15 mL). The combined organic phase was

dried over Na<sub>2</sub>SO<sub>4</sub> and concentrated. A small aliquot of the organic phase was analyzed by GC or GC-MS to monitor products formation.

### 7.7 <sup>15</sup>N labeled experiment

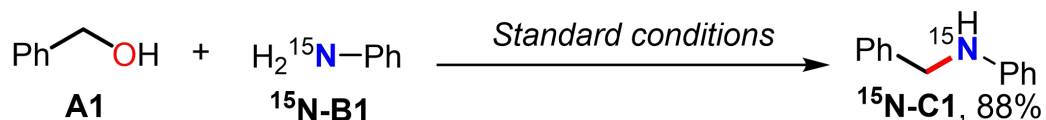

Using a nitrogen-filled glove box, an oven-dried new pressure tube (38 mL volume) was charged with a magnetic stirring bar, *t*-BuOK (0.4 mmol), **A1** (0.5 mmol), <sup>15</sup>**N-B1** (0.25 mmol), **D13** (0.4 mmol) and 1,4-dioxane (1.0 mL). Then the seal tube was closed tightly with a teflon cap, removed from the glove box and immersed into a pre-heated oil bath (120 °C). After 15 hours the reaction was cooled, quenched with half-saturated brine and extracted with dichloromethane (4 x 15 mL). The combined organic phase was dried over Na<sub>2</sub>SO<sub>4</sub> and concentrated. A small aliquot of the organic phase was analyzed by GC or GC-MS to monitor products formation. Purification of the remainder by column chromatography on silica gel gave the corresponding products <sup>15</sup>**N-C1** (pentane/ethyl ether = 15/1 – 5/1) in the reported yield.

**N-benzylaniline** (<sup>15</sup>**N-C1**): the light yellow oil 41.6 mg, 90% yield. <sup>1</sup>H NMR (299.86

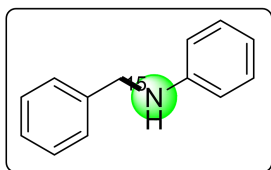

MHz, 23.0 °C, CDCl<sub>3</sub>): δ = 7.40 – 7.14 (m, 5H), 7.09 (t, *J* = 7.6 Hz, 2H), 6.63 (t, *J* = 7.2 Hz, 1H), 6.55 (d, *J* = 8.1 Hz, 2H), 4.23 (s, 2H), 3.94 (bs, 1H) ppm; <sup>13</sup>C NMR (75.41 MHz, 23.0 °C,

CDCl<sub>3</sub>): δ 148.2, 139.4, 129.2, 128.6, 127.5, 127.2, 117.5, 112.8 (d, <sup>2</sup>*J*<sub>C-15N</sub> = 2.3 Hz), 48.2 (d, <sup>1</sup>*J*<sub>C-15N</sub> = 2.6 Hz) ppm. **HRMS** (ESI) calcd. for [M+H]: 185.1097, found: 185.1098.

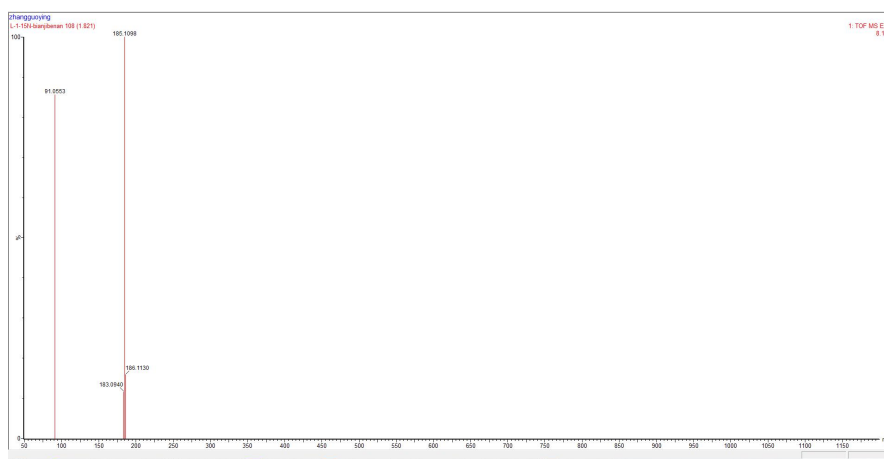

Fig S1 The HRMS of the *N*-benzylaniline ( $^{15}\text{N}$ -C1)

### 7.8 Time-conversion-plot reaction

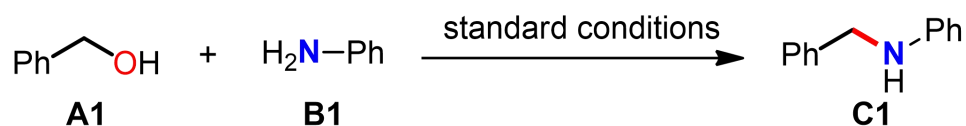

Using a nitrogen-filled glove box, an oven-dried new pressure tube (38 mL volume) was charged with a magnetic stirring bar, *t*-BuOK (0.8 mmol), **A1** (1.0 mmol), **B1** (0.5 mmol), **D13** (0.8 mmol) and 1,4-dioxane (2.0 mL). Then the seal tube was closed tightly with a teflon cap, removed from the glove box and immersed into a pre-heated oil bath (120 °C). After desired time the reaction was cooled, quenched with half-saturated brine and a small aliquot of the organic phase was analyzed by GC and GC-MS to monitor product formation. Composition of **A1**, **B1**, **D13**, **C1**, **E1** and benzamide determined by GC-analysis using *n*-dodecane as internal standard.



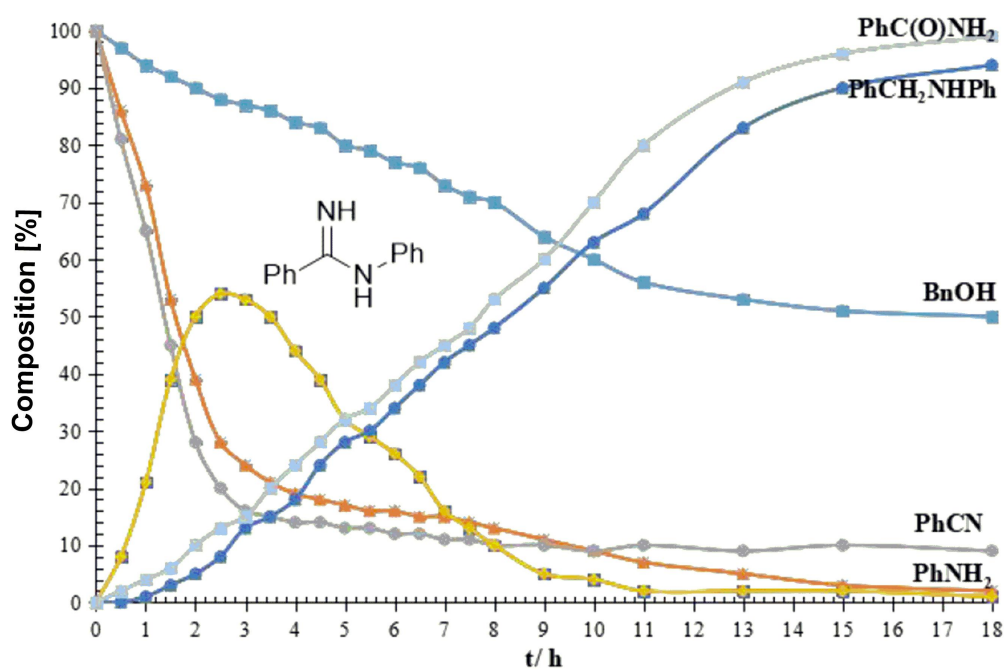

Fig S2 Time-conversion-plot for the reaction

## 8. References

- (a) R. Fertig, T. Irrgang, F. Freitag, J. Zander and R. Kempe, *ACS Catalysis*, 2018, **8**, 8525; (b) F. Freitag, T. Irrgang, R. Kempe, *J. Am. Chem. Soc.*, 2019, **141**, 11677; (c) M. Huang, Y. Li, Y. Li, J. Liu, S. Shu, Y. Liu and Z. Ke, *Chem. Commun.*, 2019, **55**, 6213.
- (a) P. J. Wagner and L. Wang, *Org. Lett.*, 2006, **8**, 645; (b) Y. Wang, H. Kobayashi, K. Yamaguchi and N. Mizuno, *Chem. Commun.*, 2012, **48**, 2642; (c) D. Wang, H. Liu, D. Yang, P. Wang, Y. Lu and Y. Liu, *ChemCatChem*, 2017, **9**, 4206.
- G. Brasche and S. L. Buchwald, *Angew. Chem. Int. Ed.*, 2008, **47**, 1932.
- U. D. Patil and P. P. Mahulikar, *ISRN Org. Chem.*, 2012, **2012**, 6.

## 9. NMR Spectra

lzy 2019-08-11-1

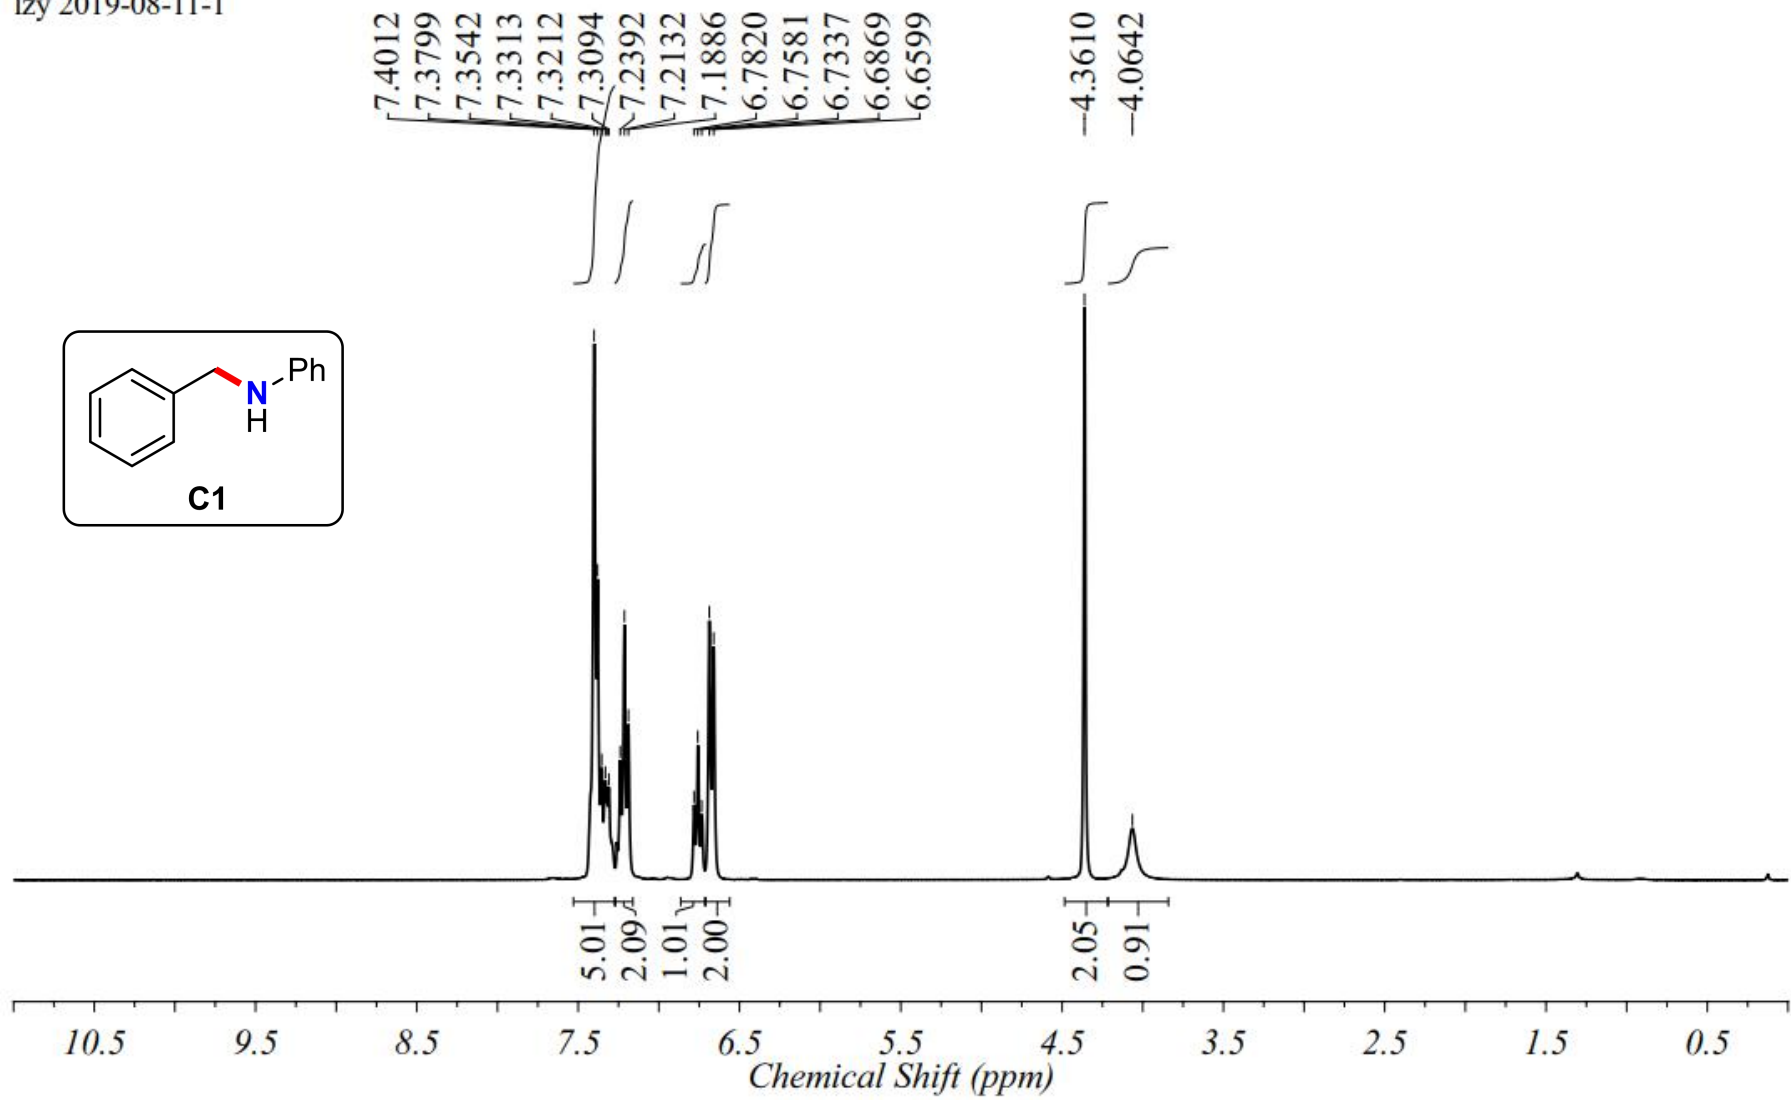

Izy 2019-08-11-1

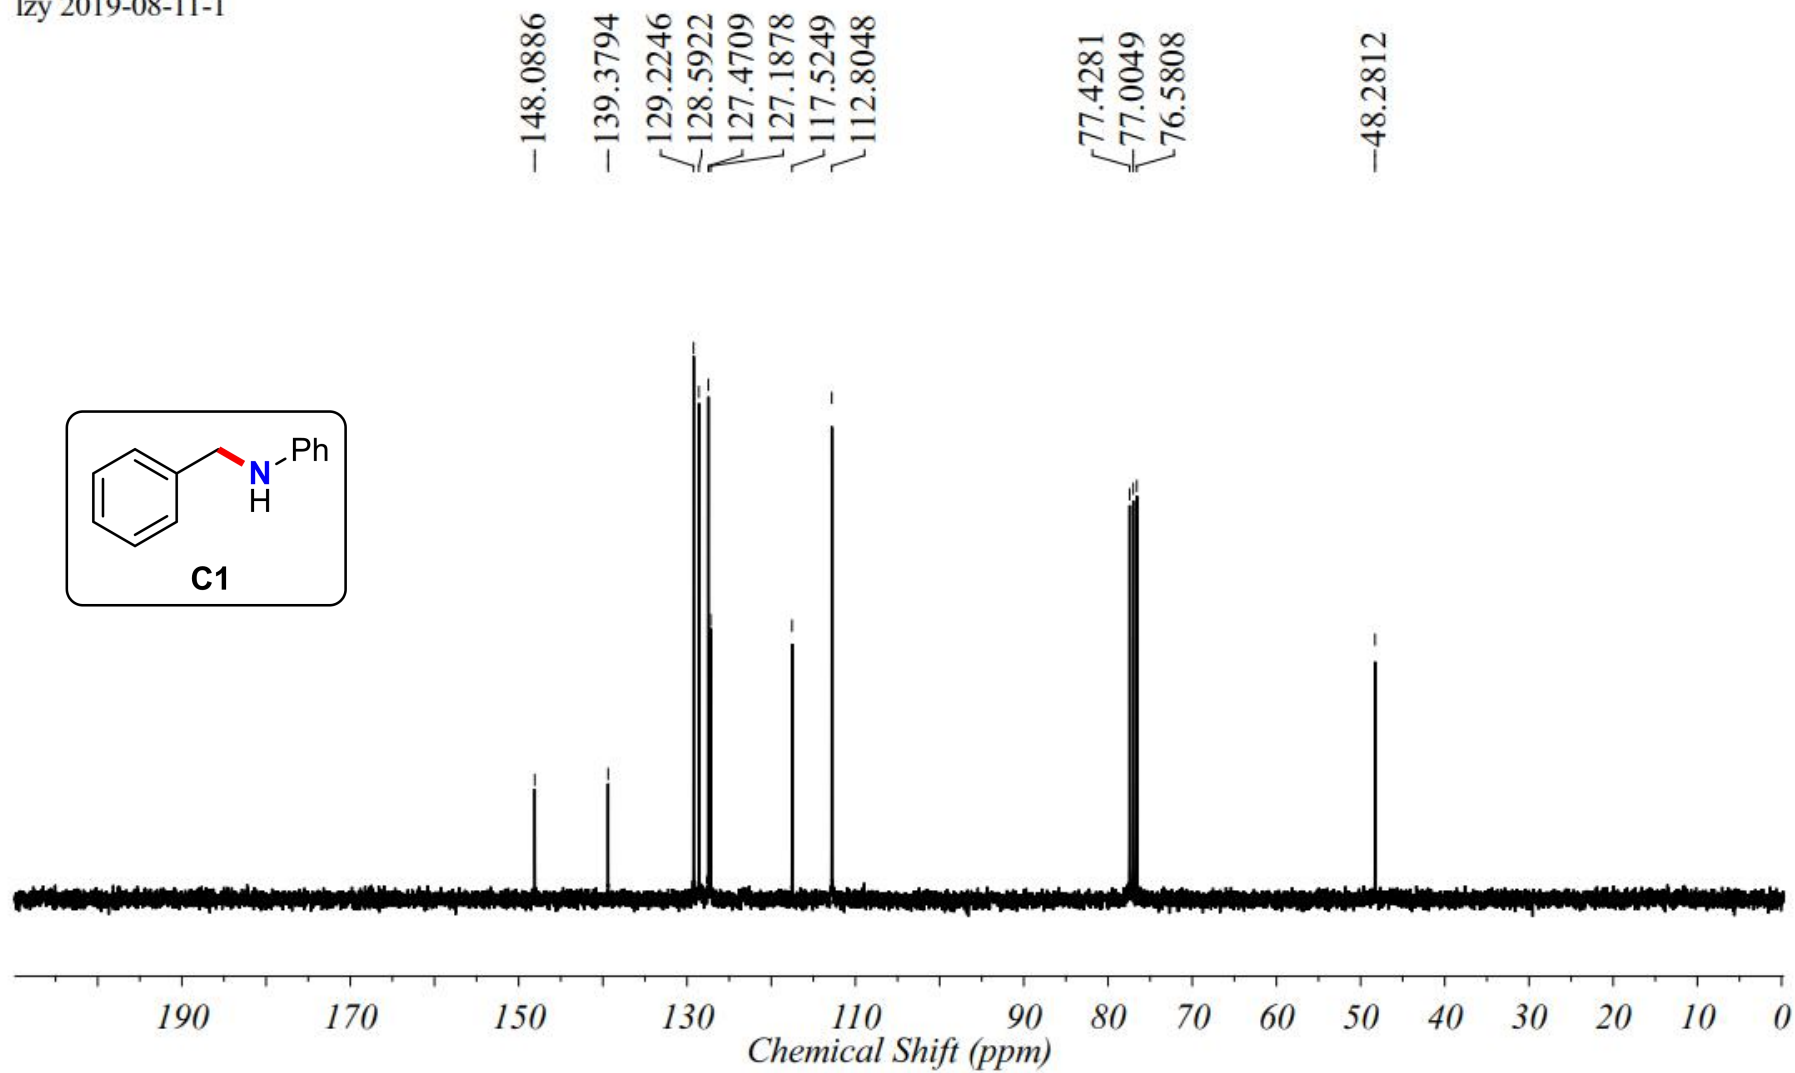

lzy 2019-08-11-2

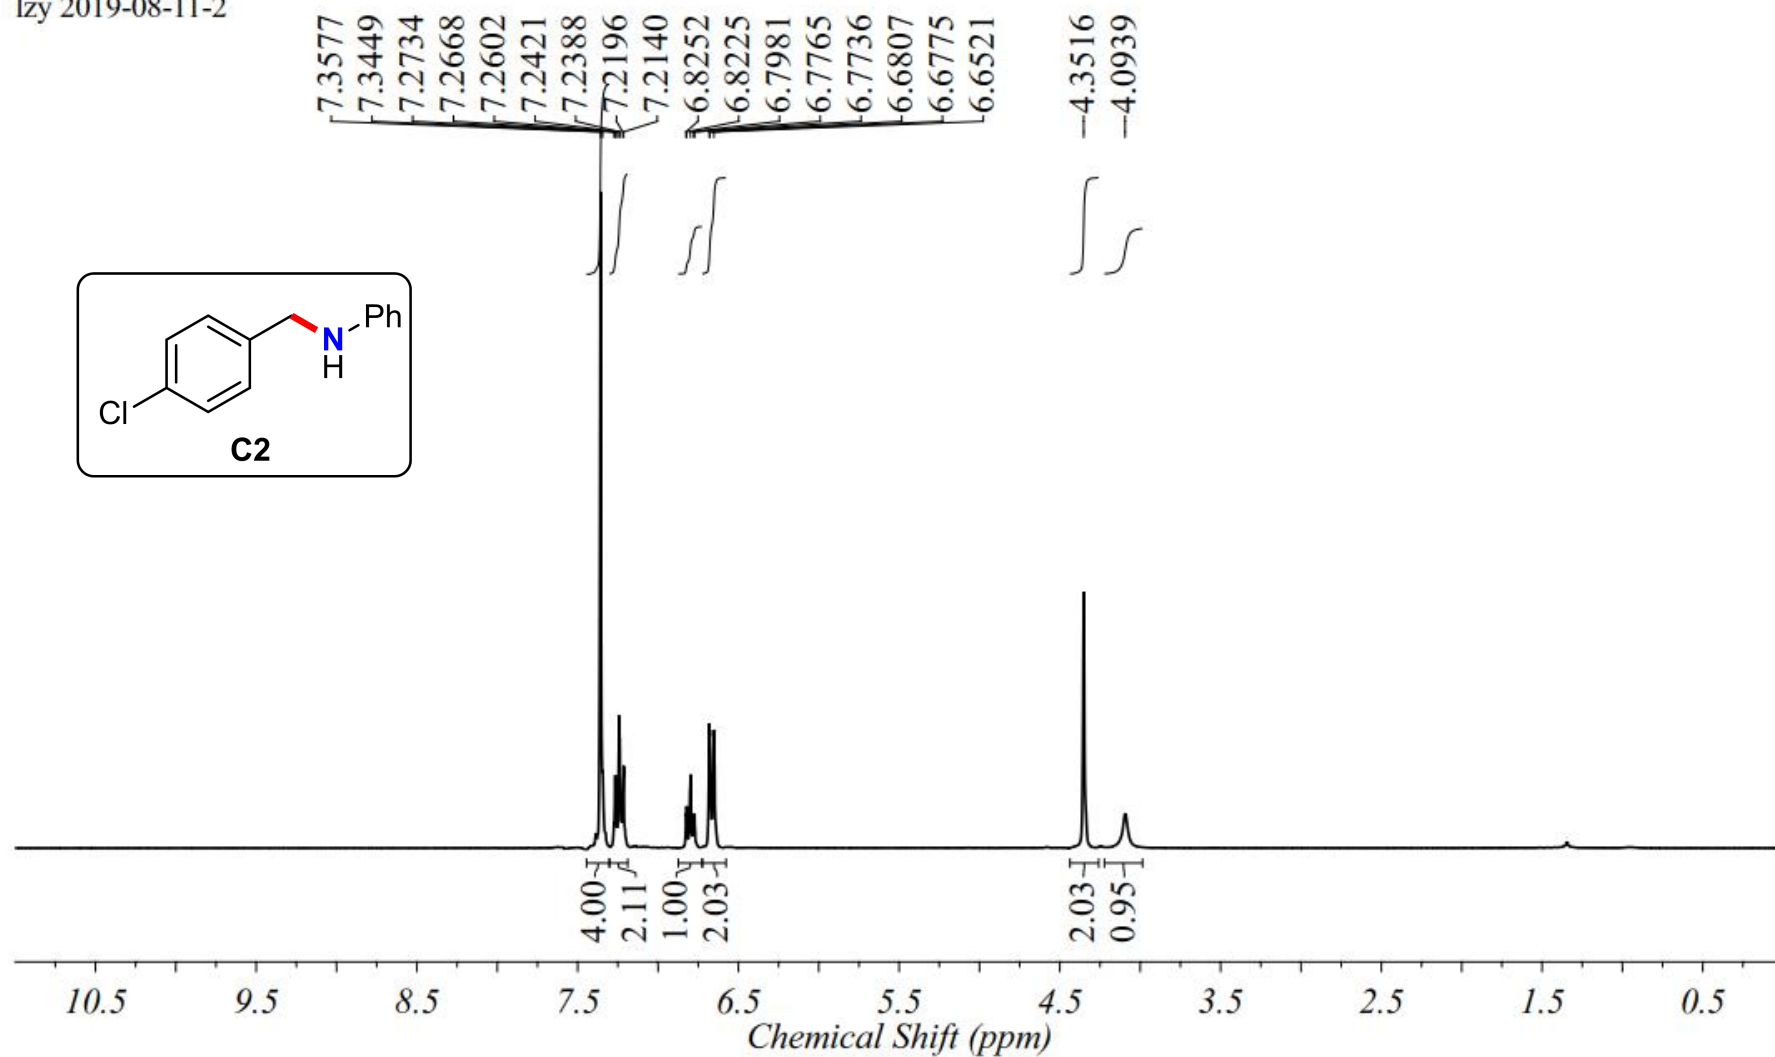

lzy 2019-08-11-2

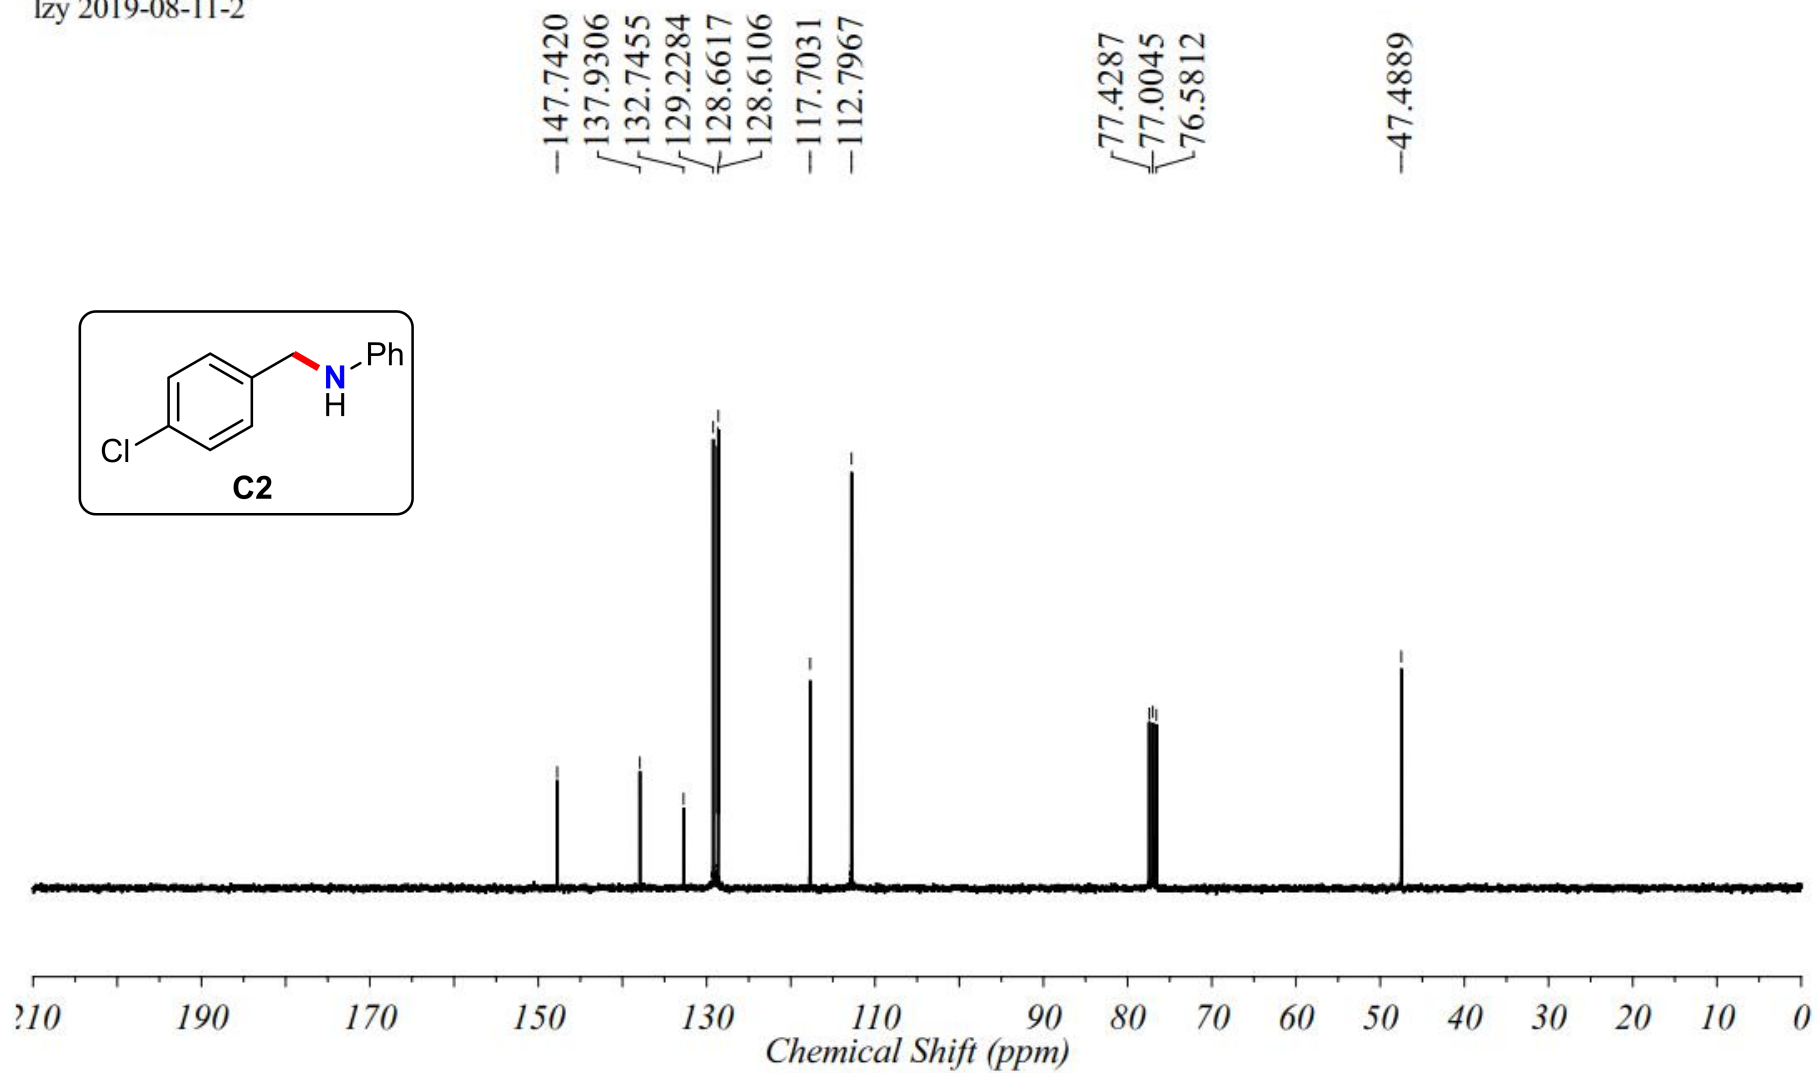

lzy 2019-08-11-3

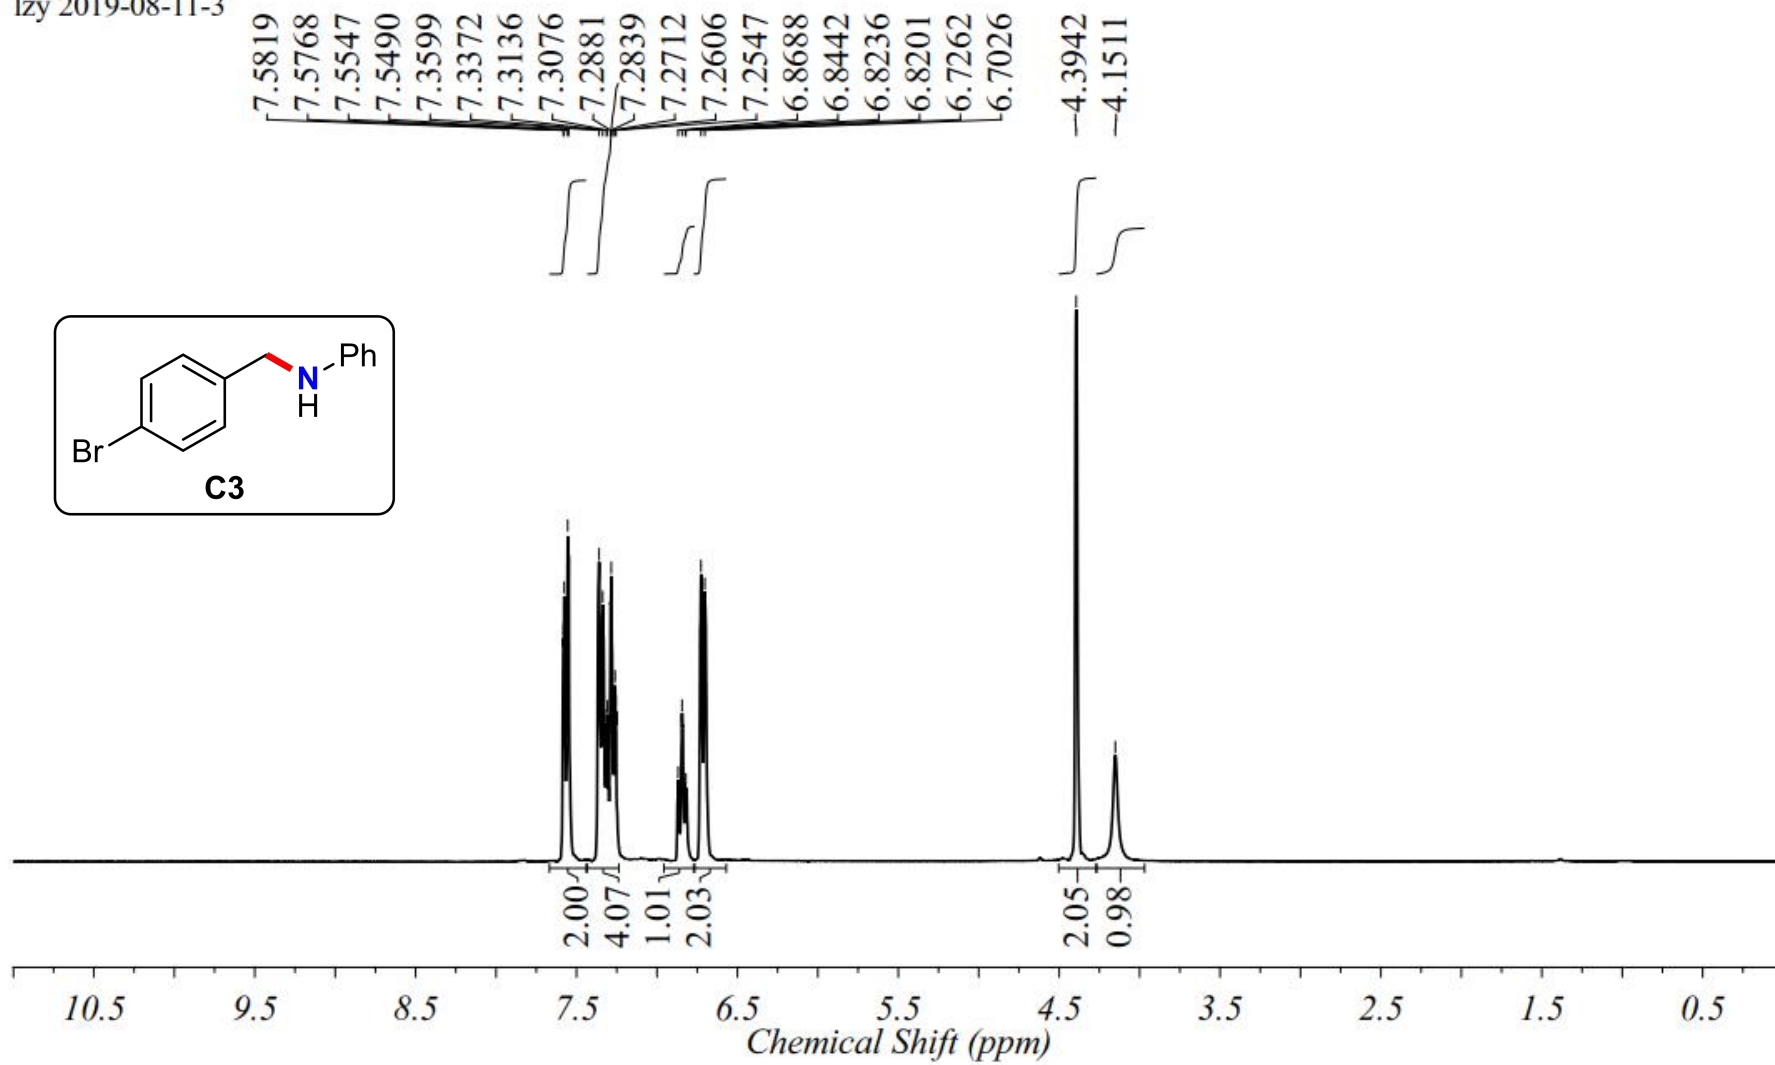

lzy 2019-08-11-3

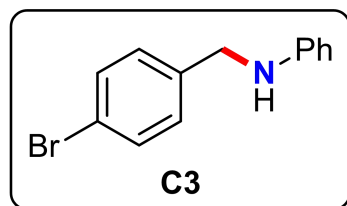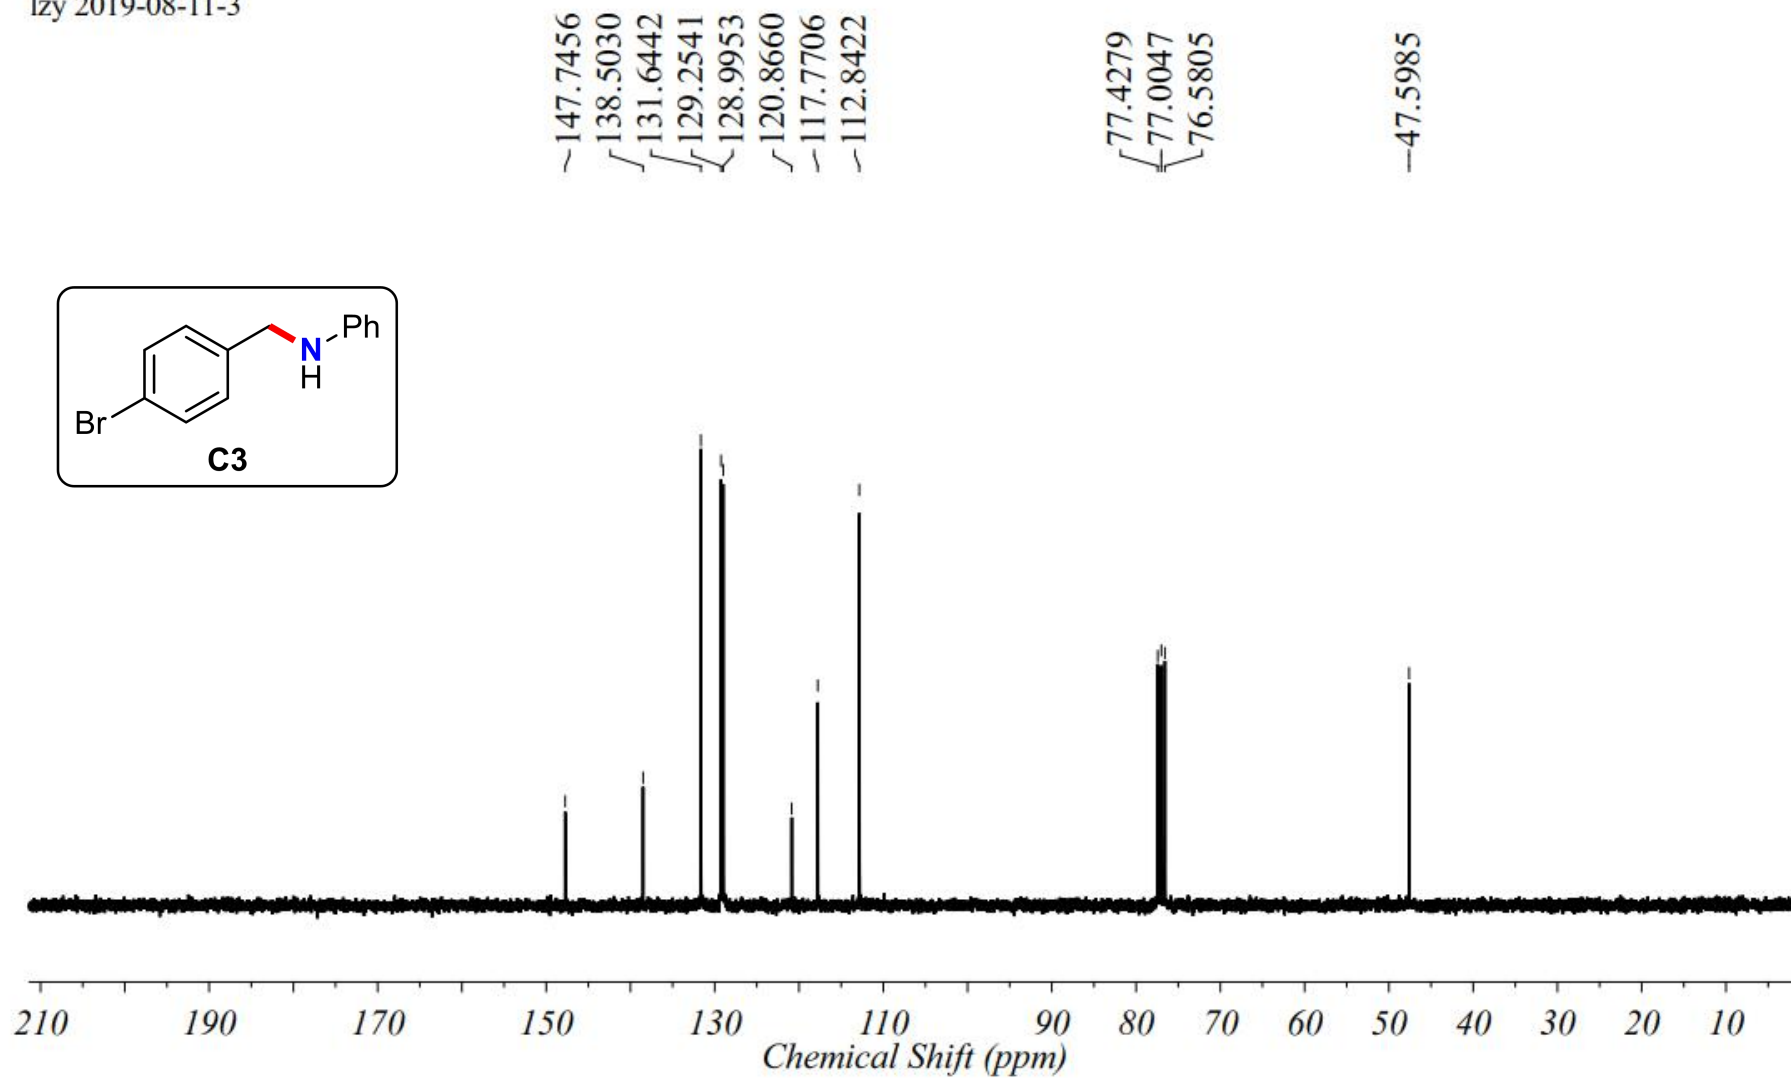



lzy 2019-08-12-1

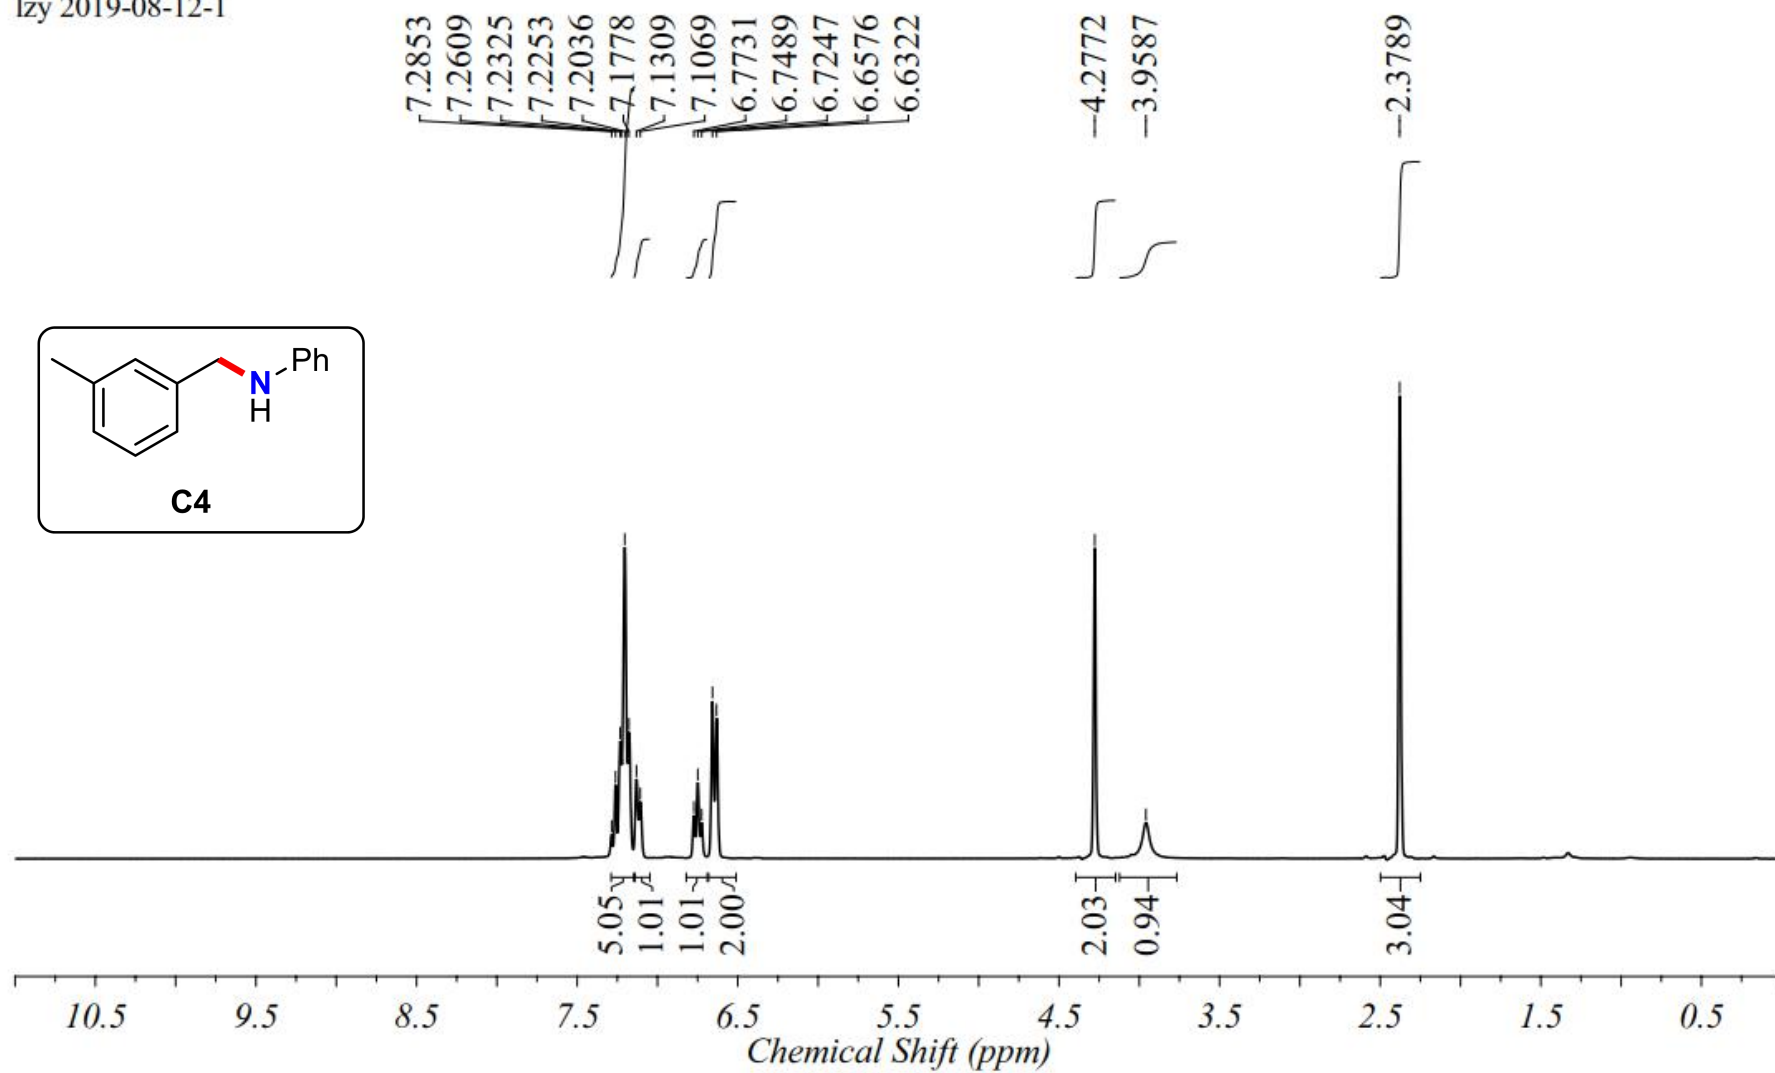

Izy 2019-08-12-1

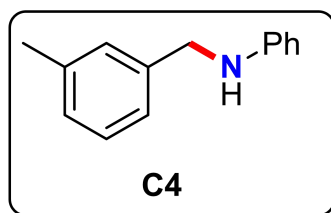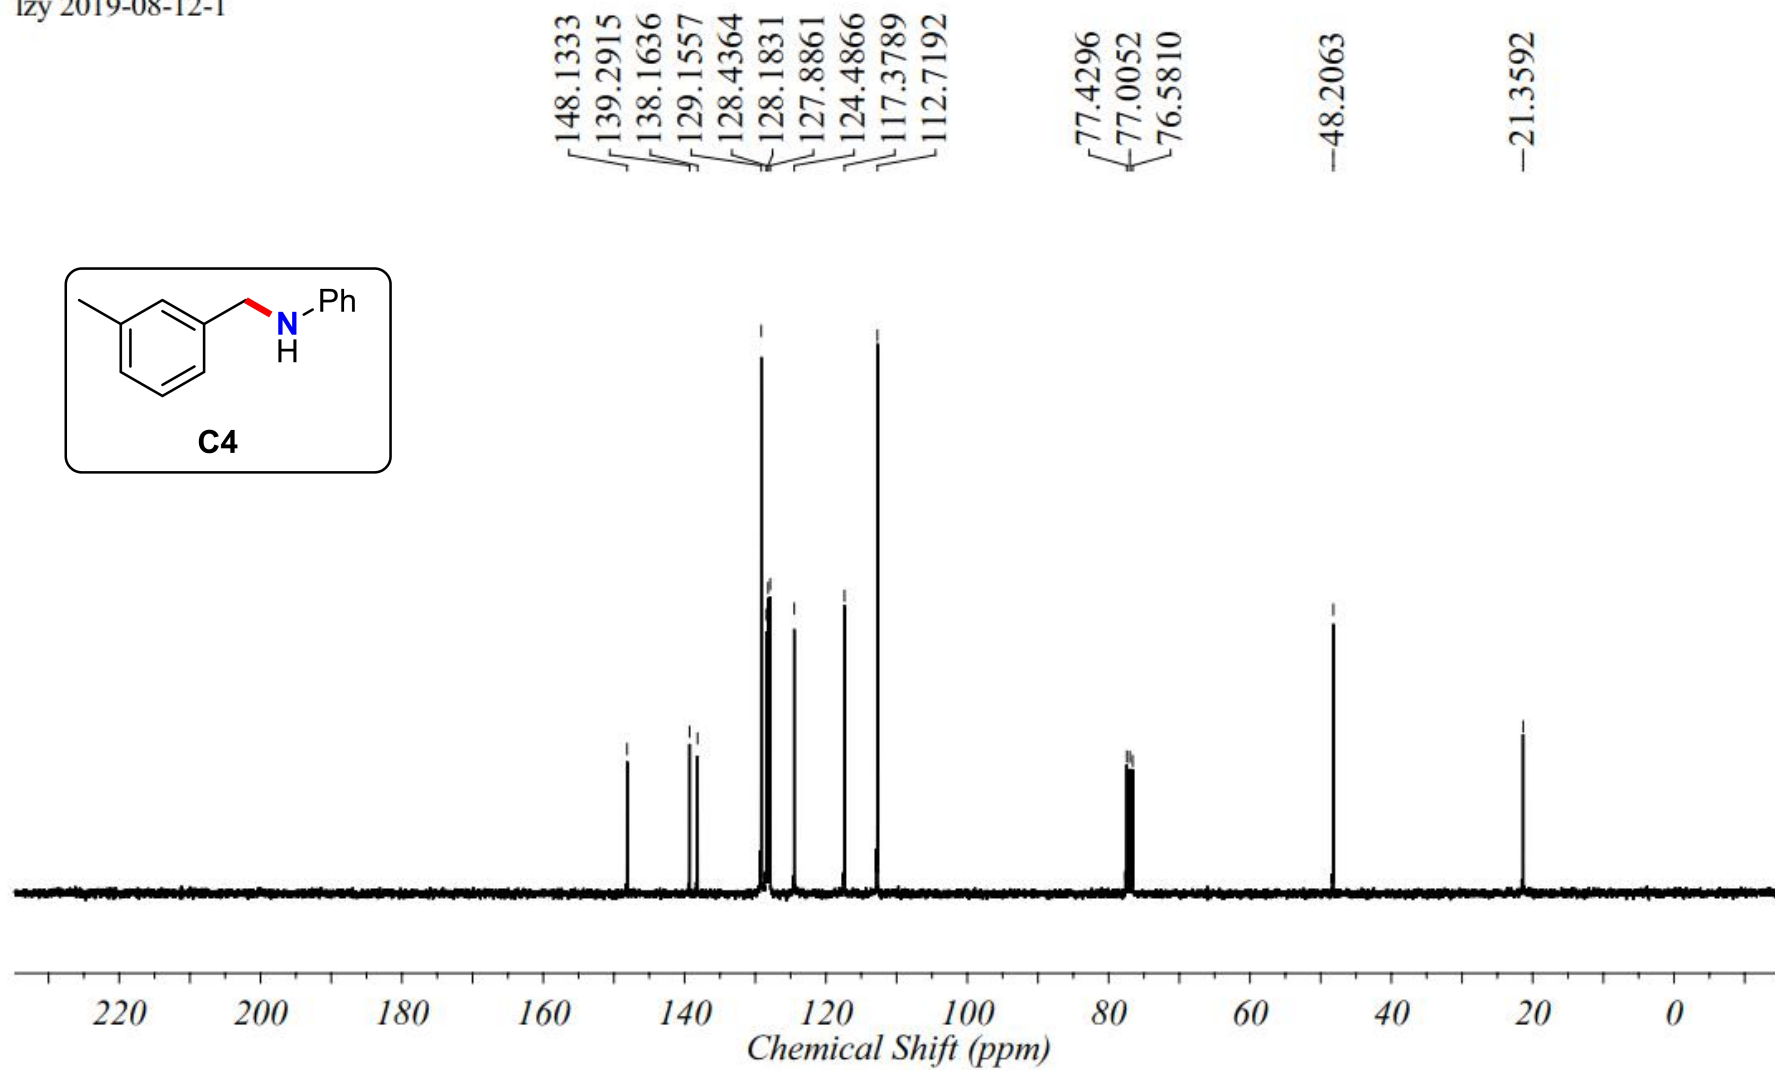

lzy 2019-08-12-2

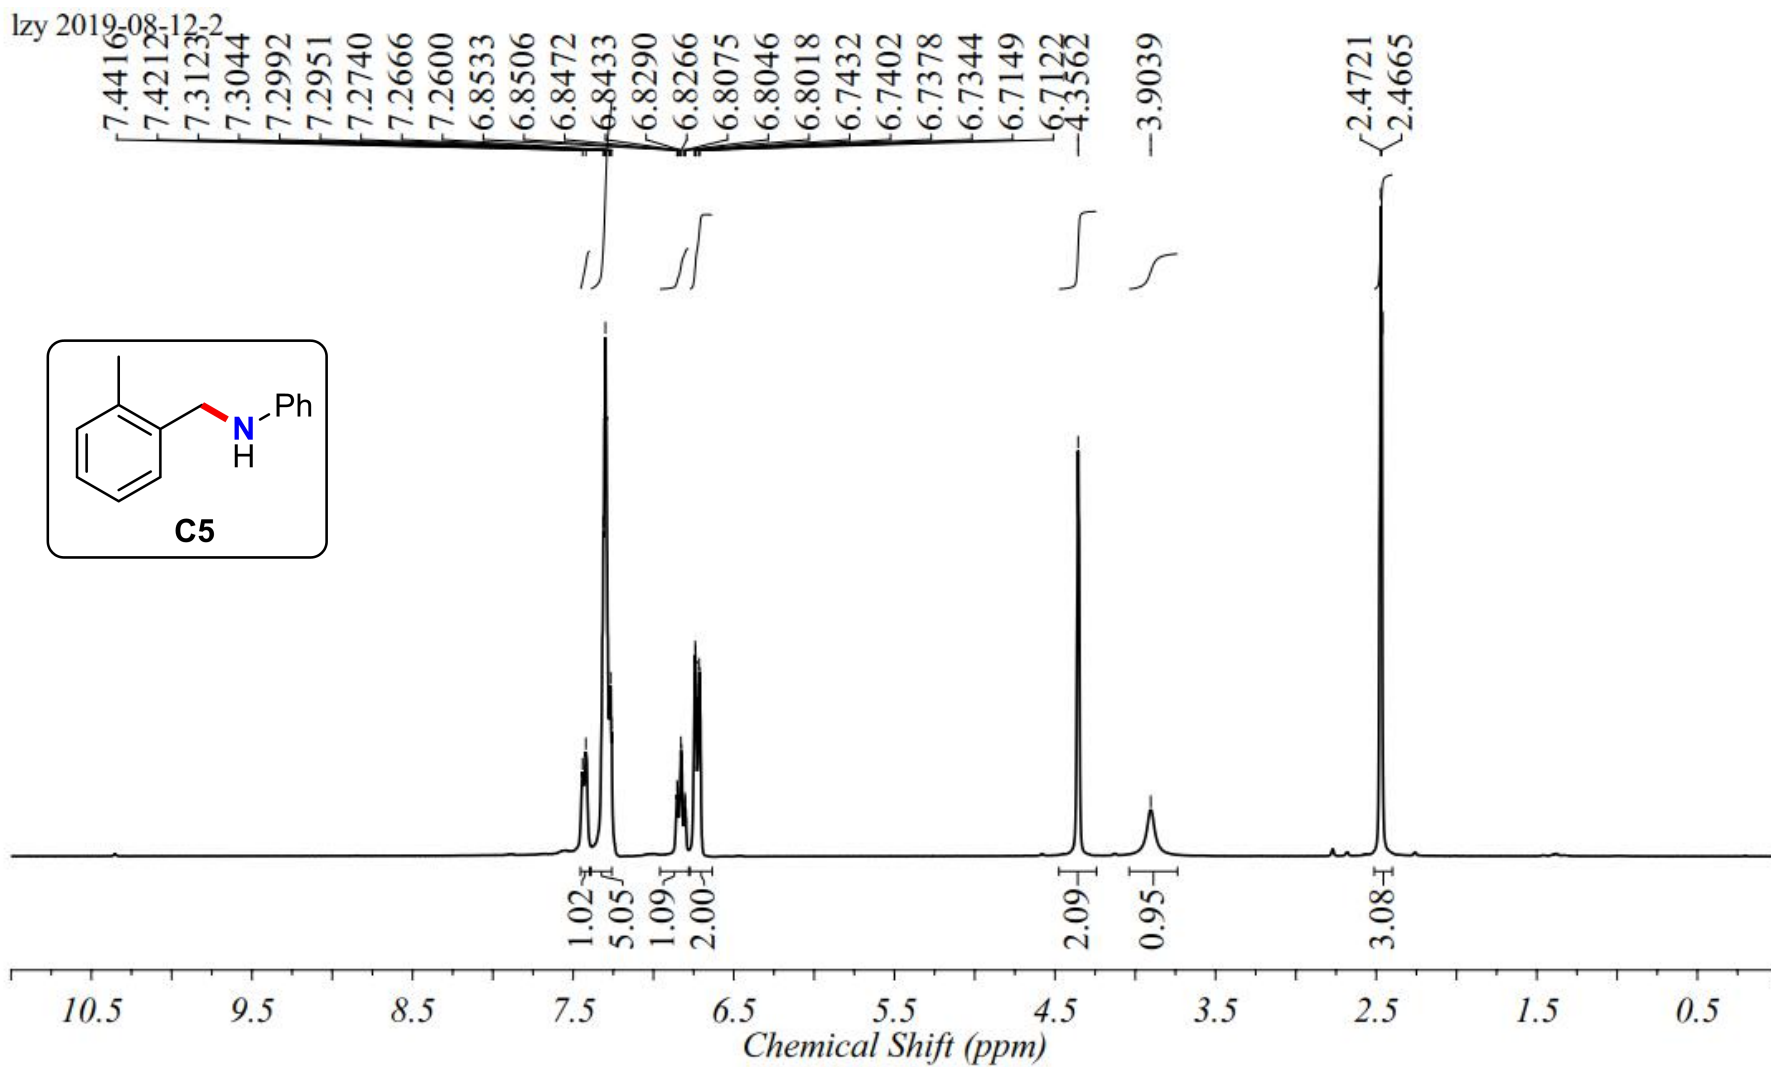

lzy 2019-08-12-2

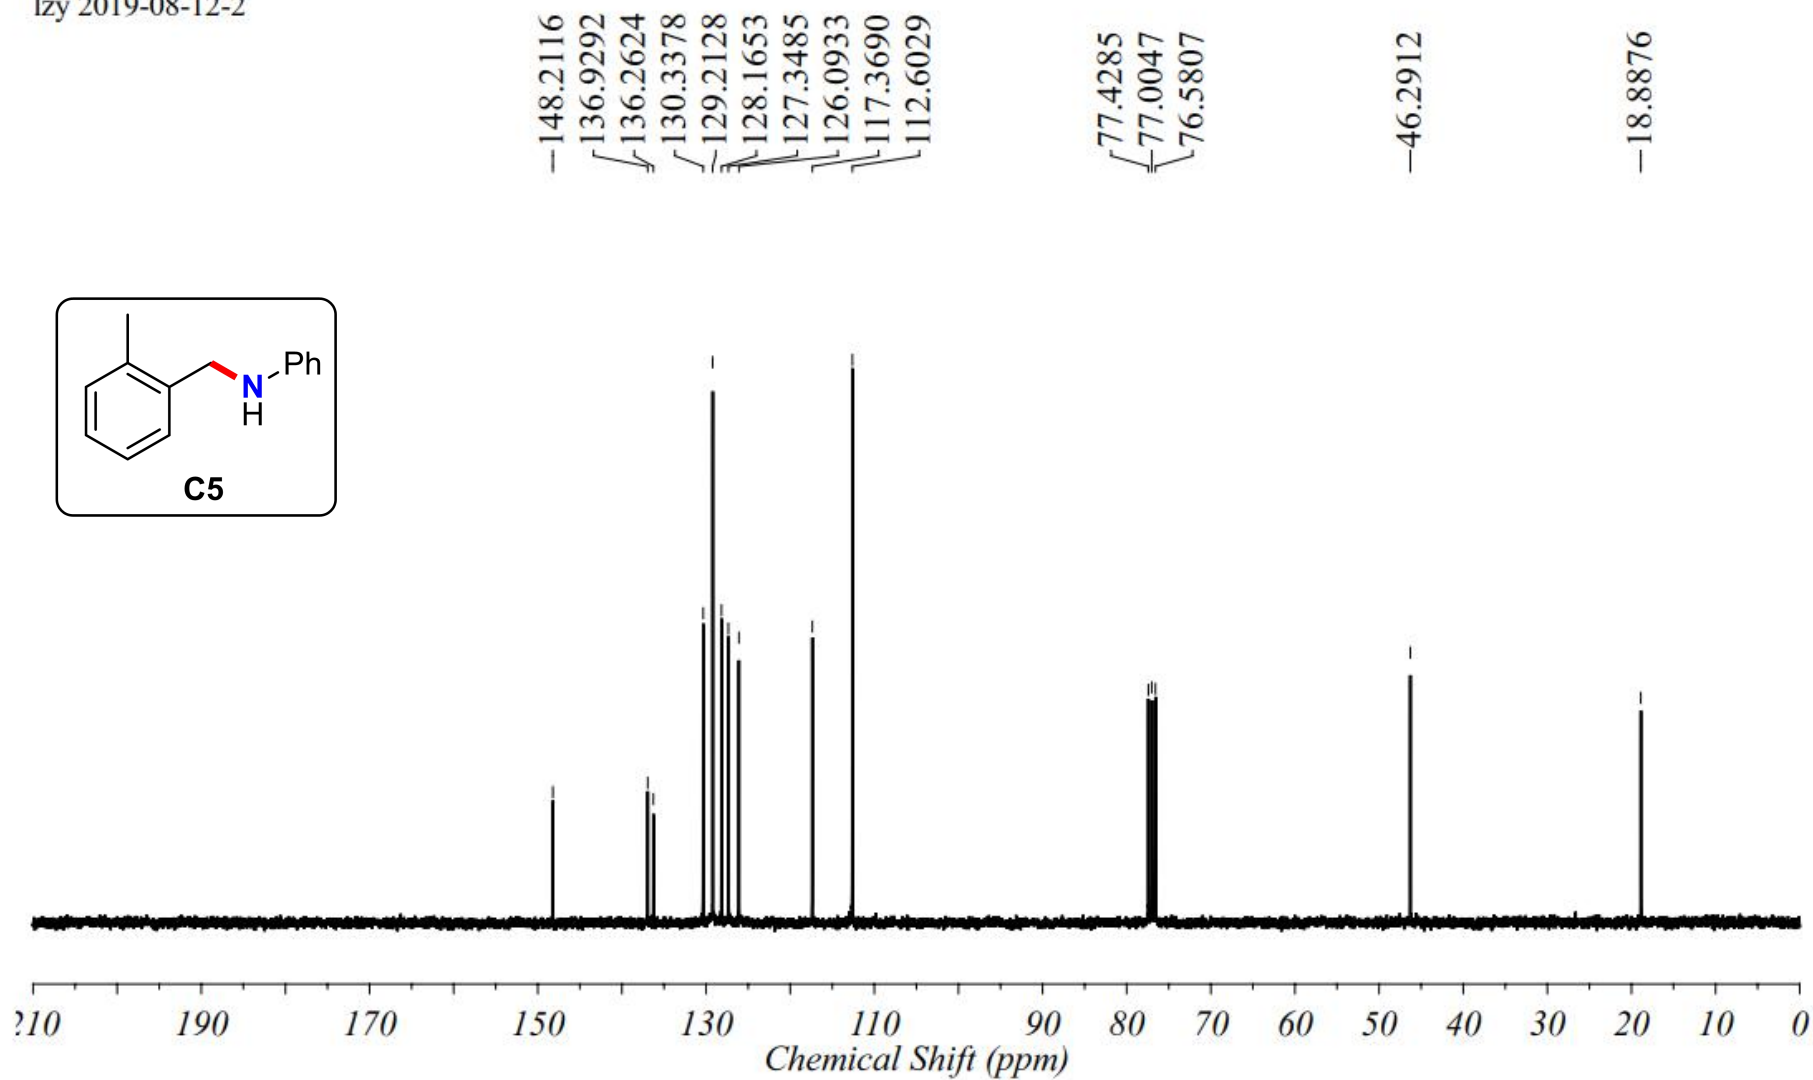

lzy 2019-08-12-3

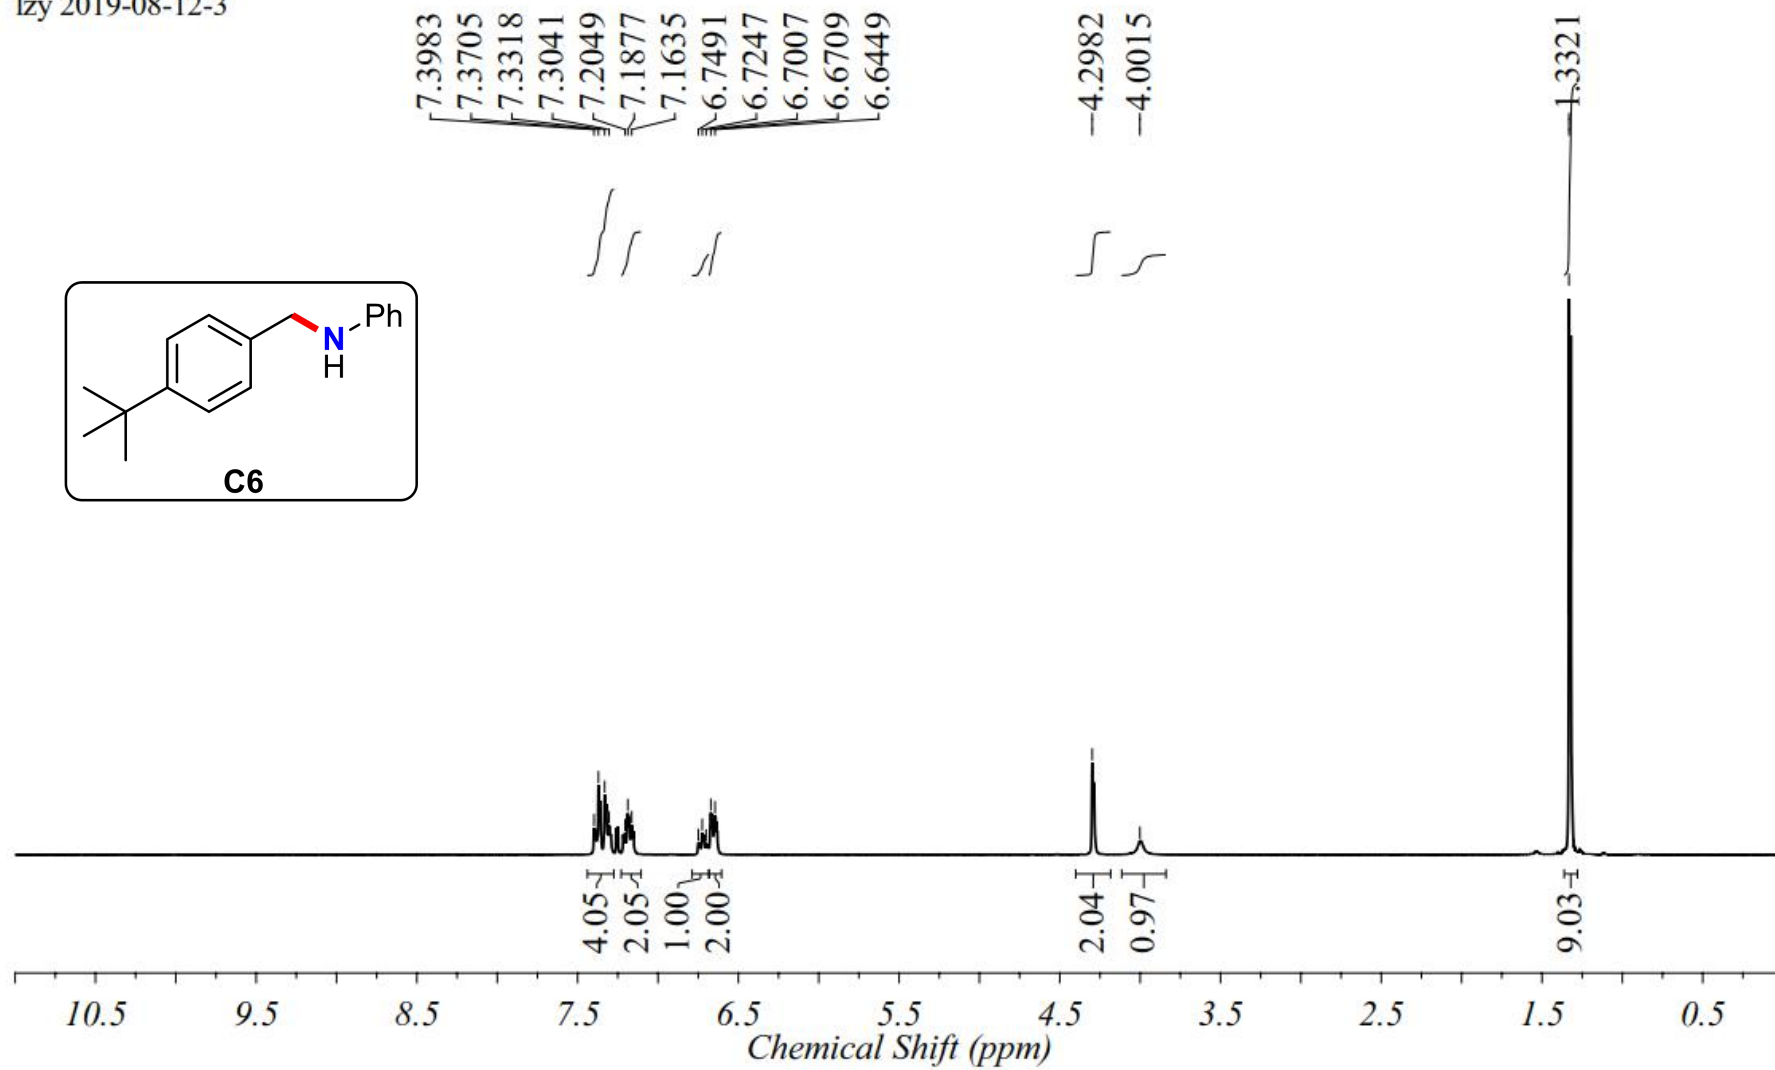

lzy 2019-08-12-3

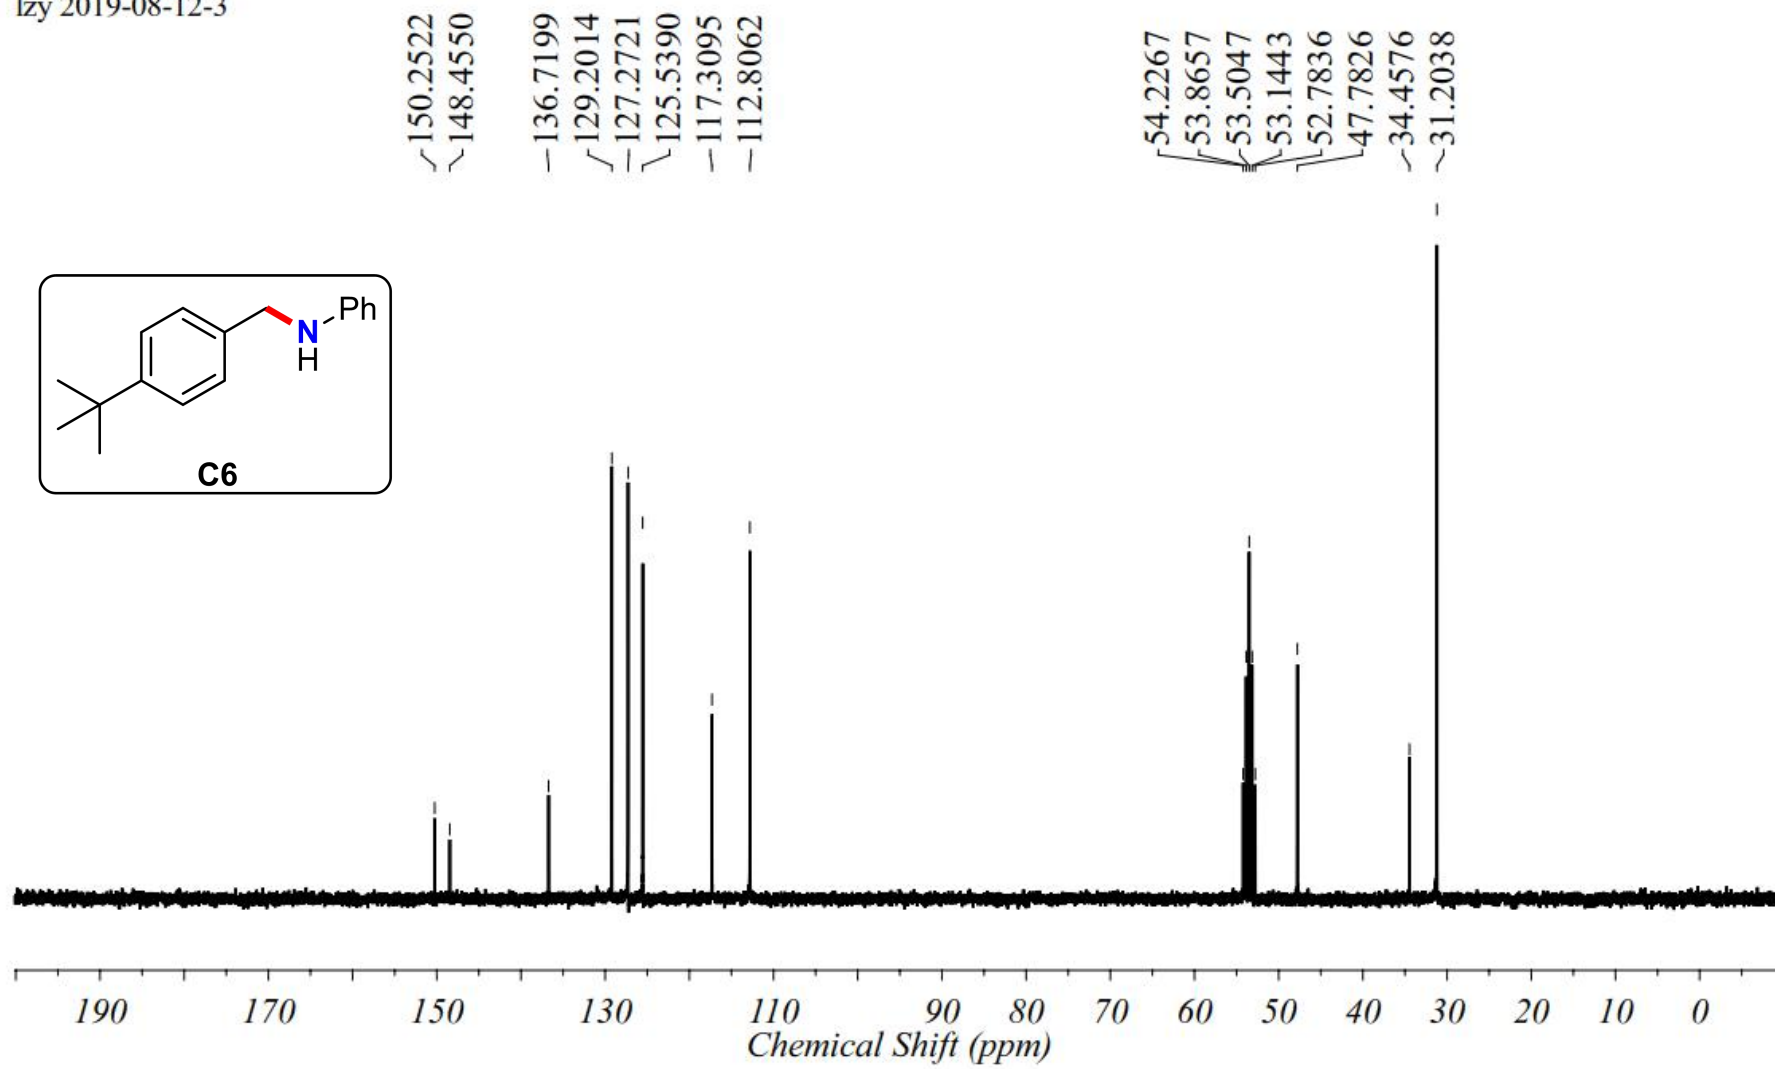

lzy 2019-08-13-1

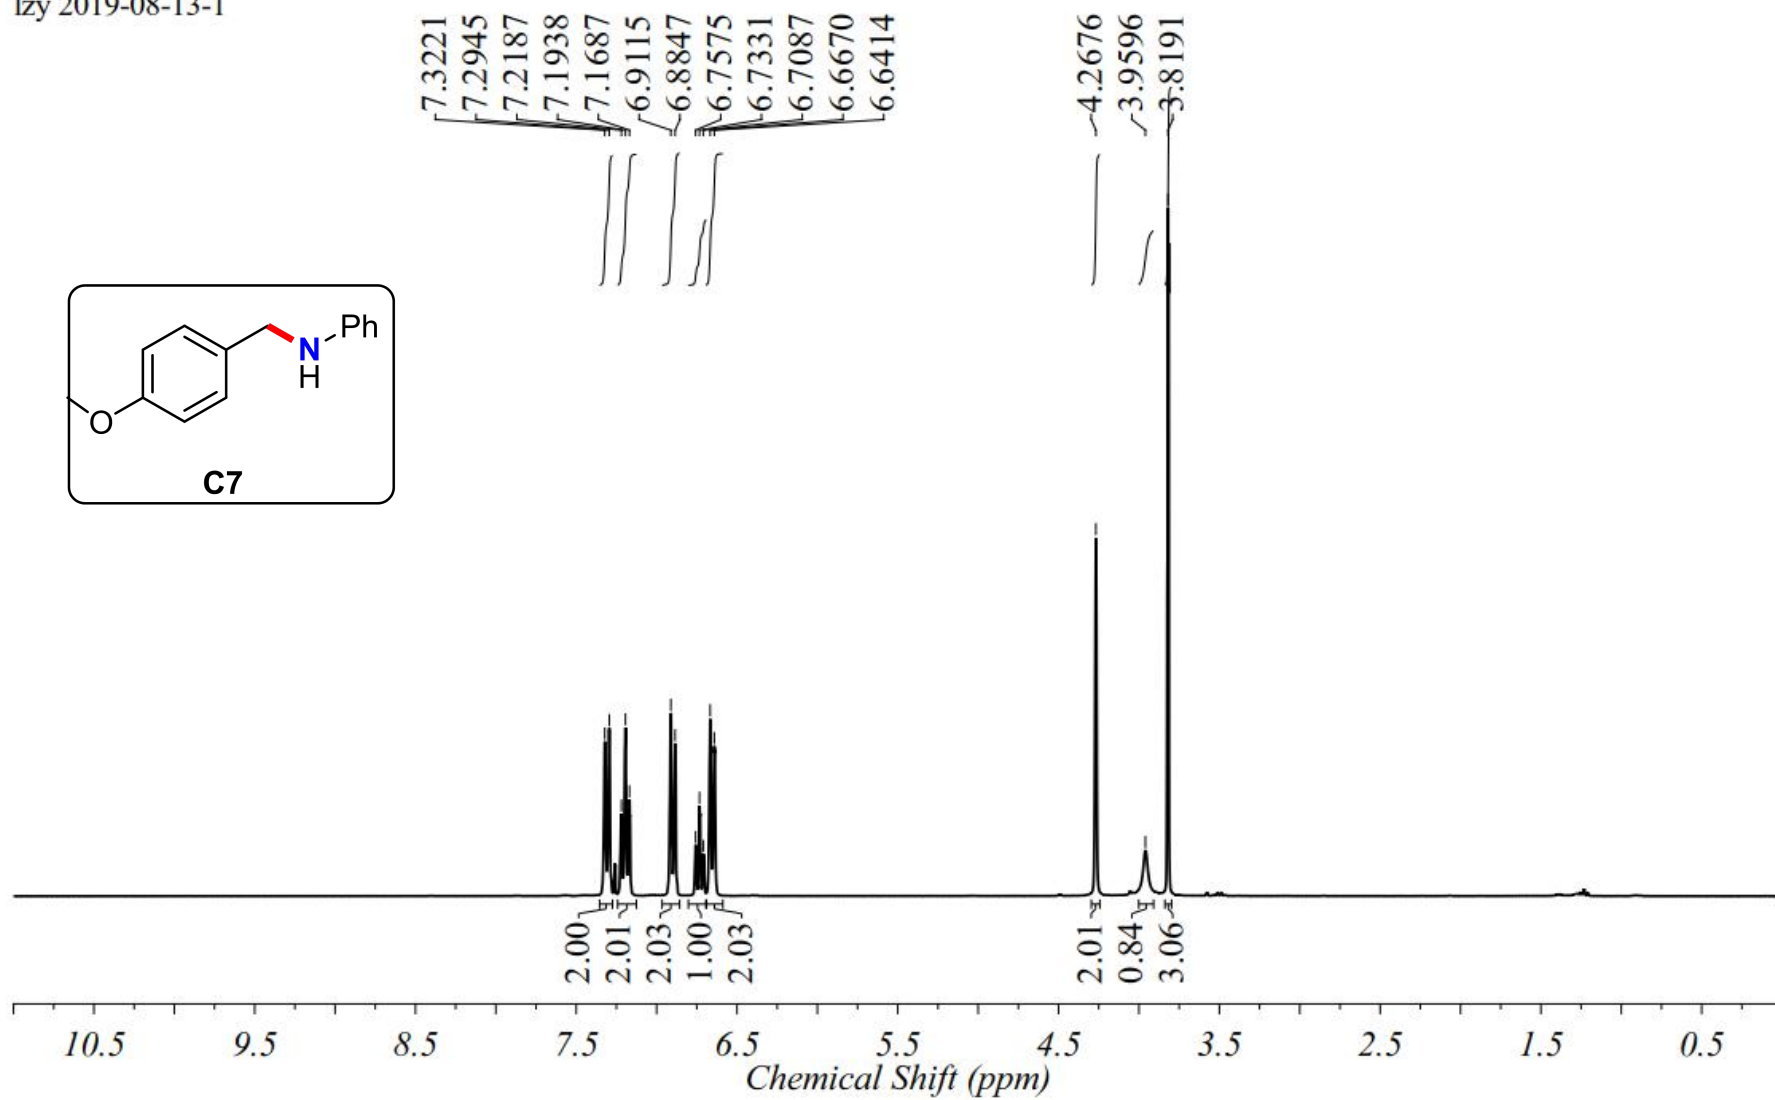

lzy 2019-08-13-1

-158.8015  
-148.1585  
131.3542  
129.2137  
128.7740  
117.4503  
113.9733  
112.7824  
77.4284  
77.0051  
76.5807  
-55.2682  
-47.7519

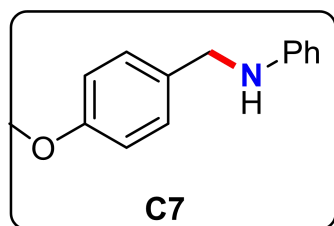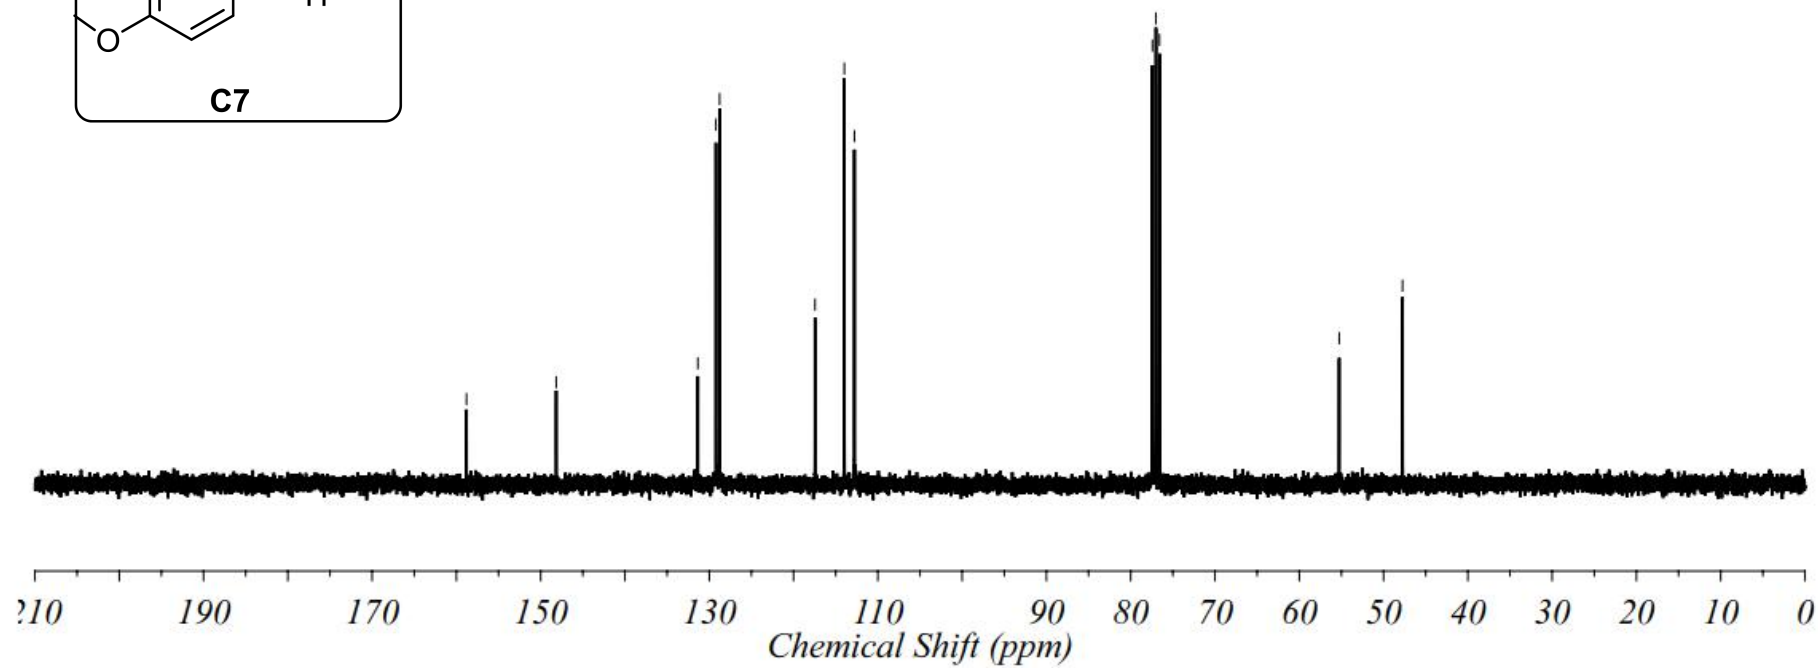



lzy 2019-08-13-2

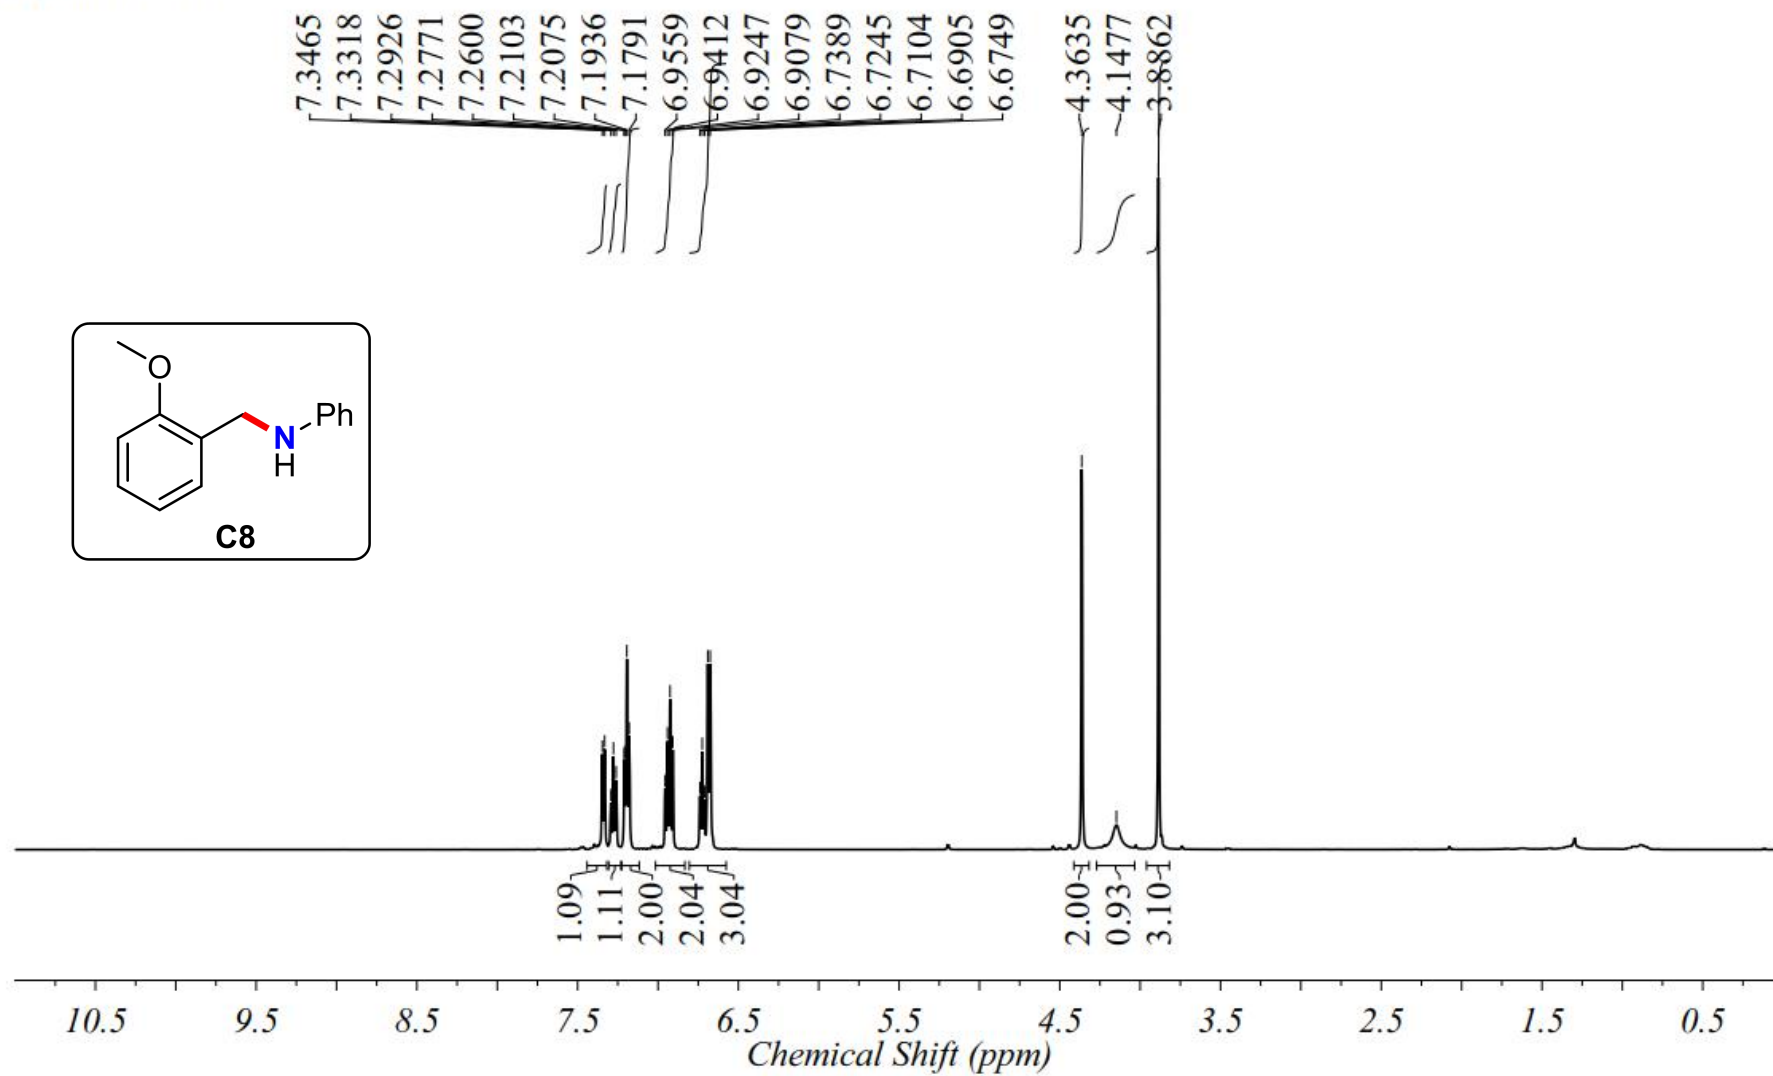

lzy 2019-08-13-2

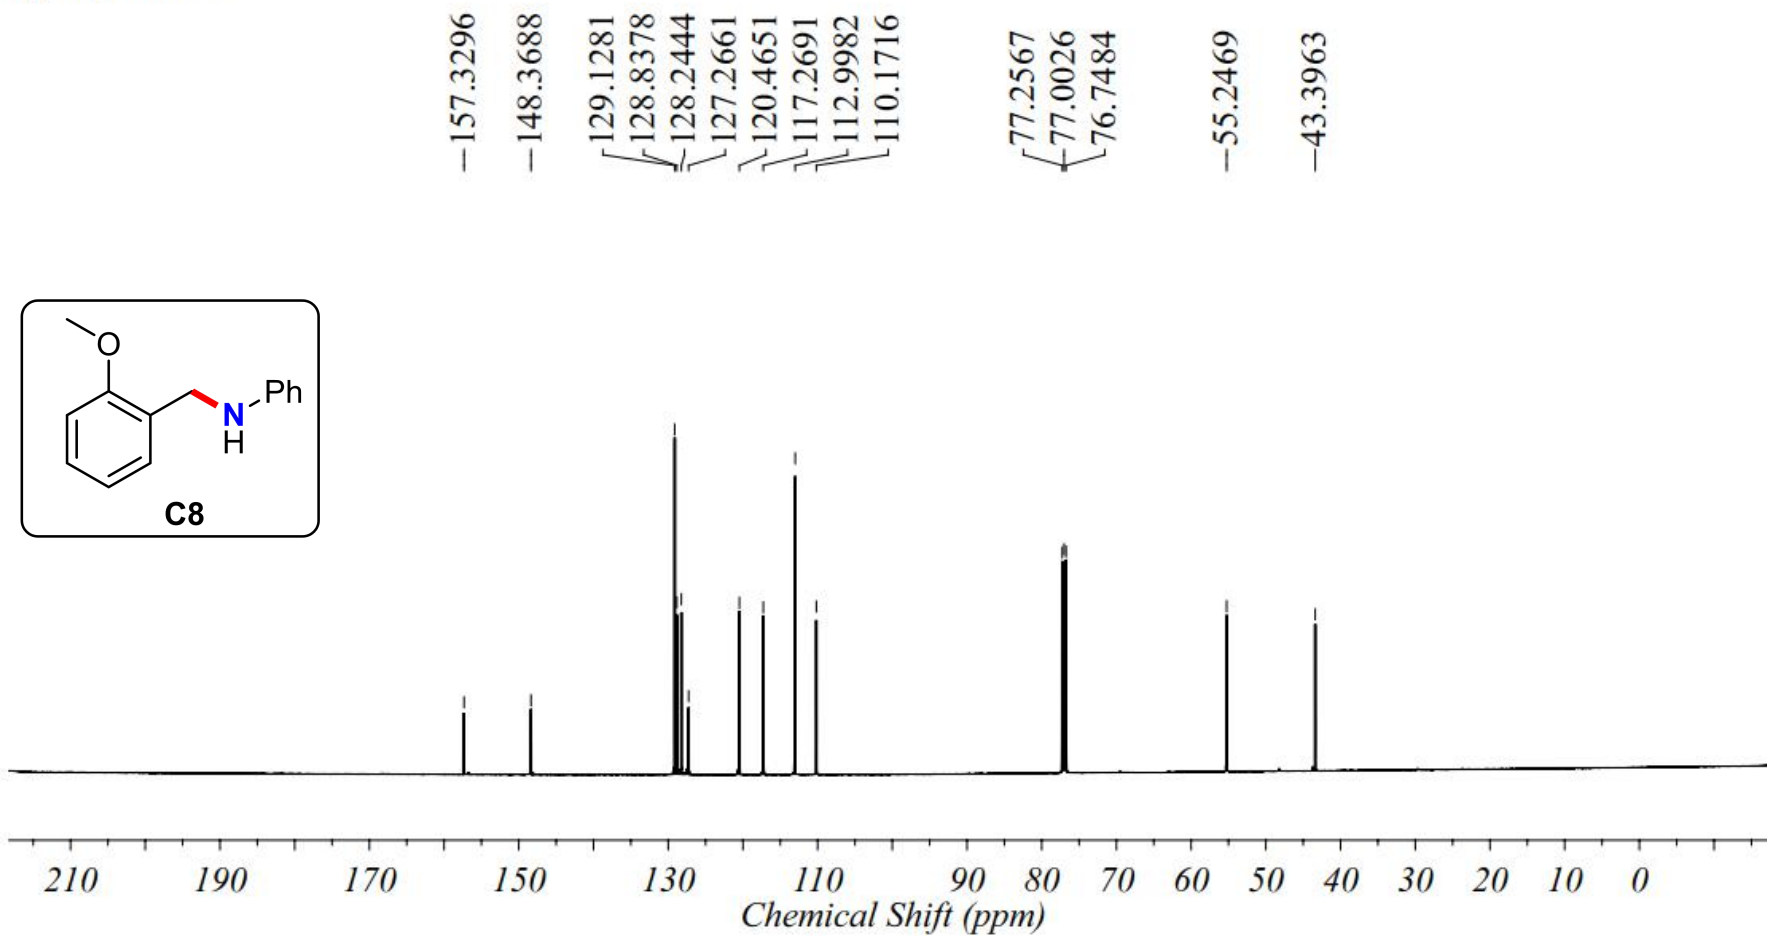

lzy 2019-08-13-3

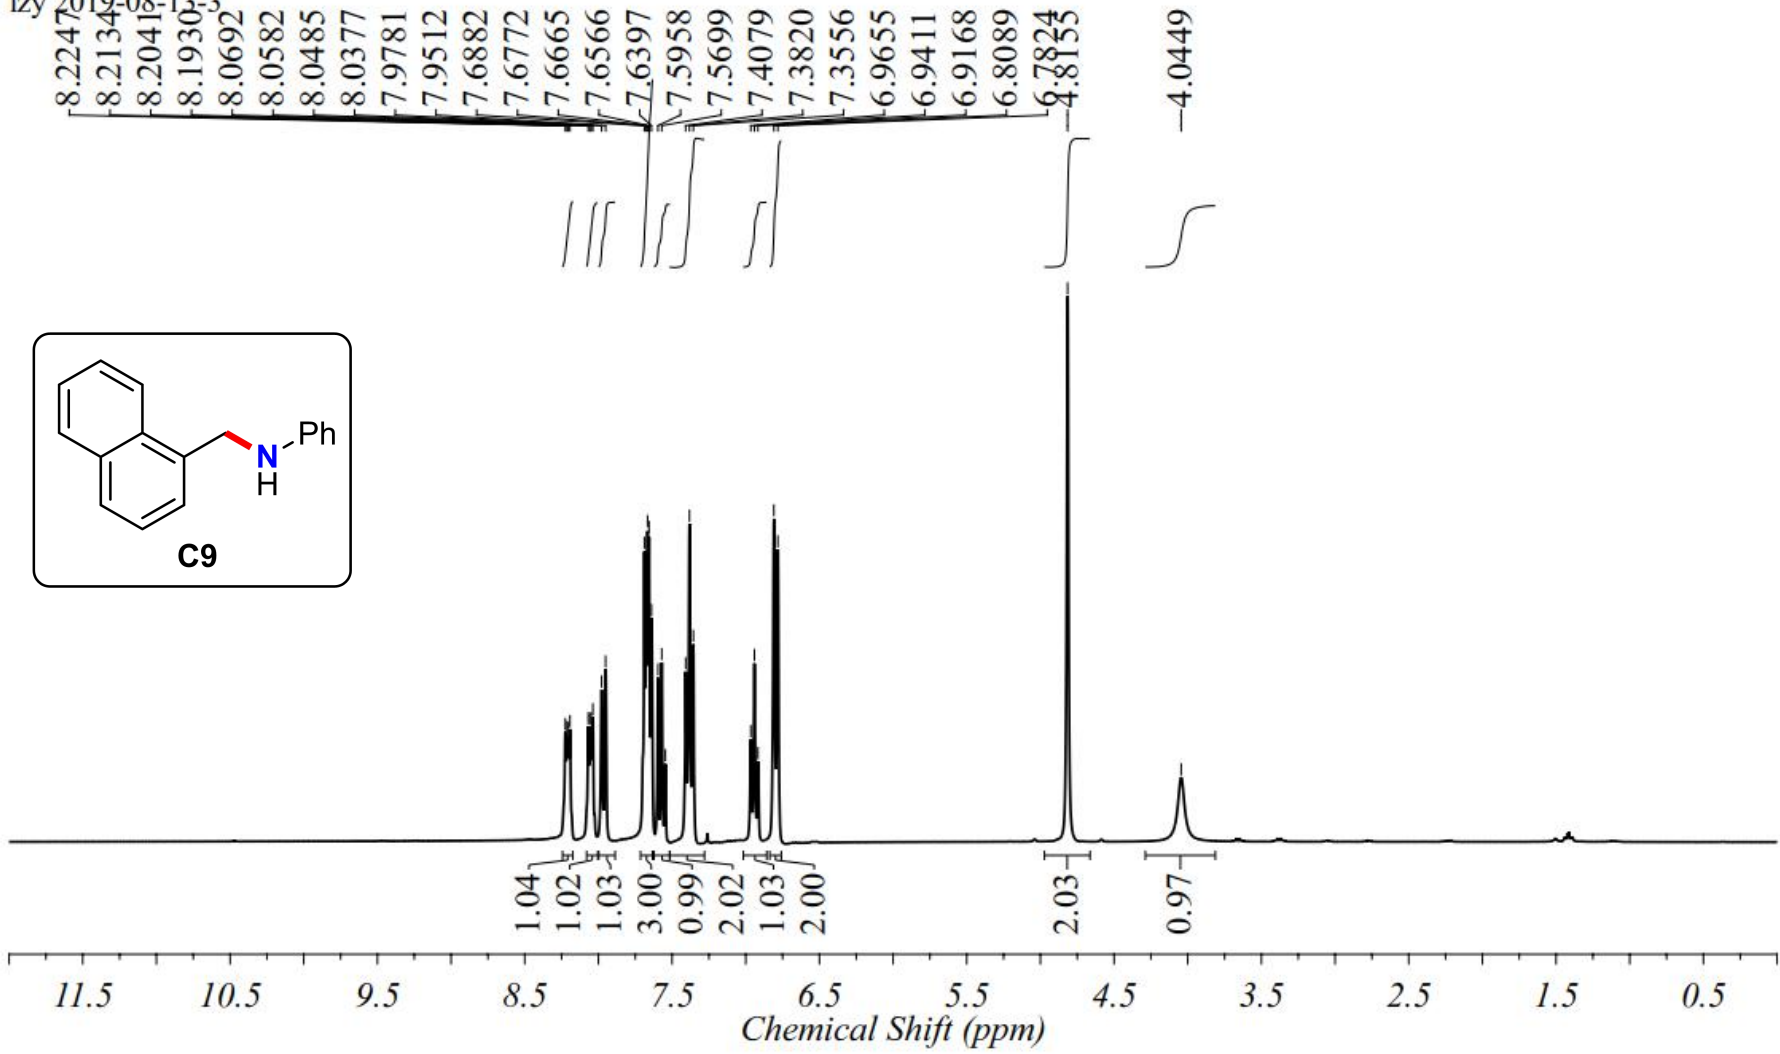

lzy 2019-08-13-3

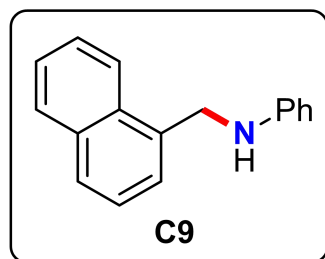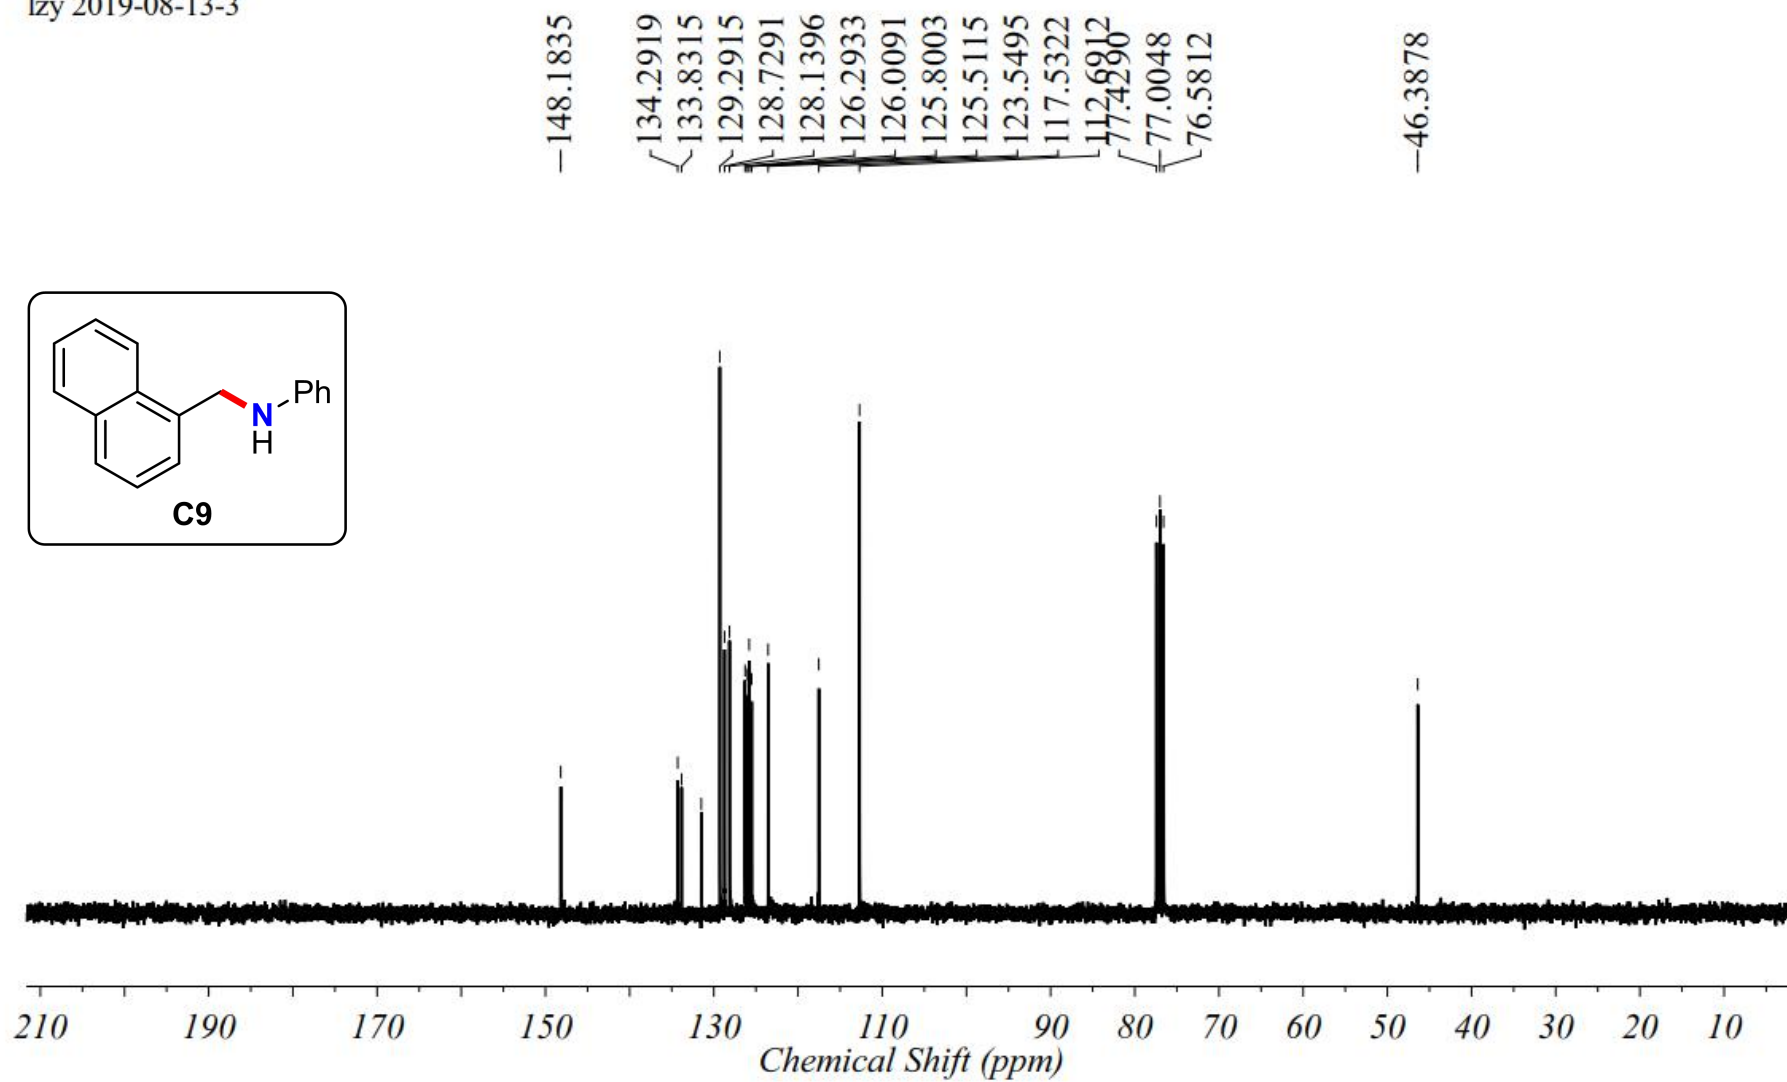

lzy 2019-08-16-1

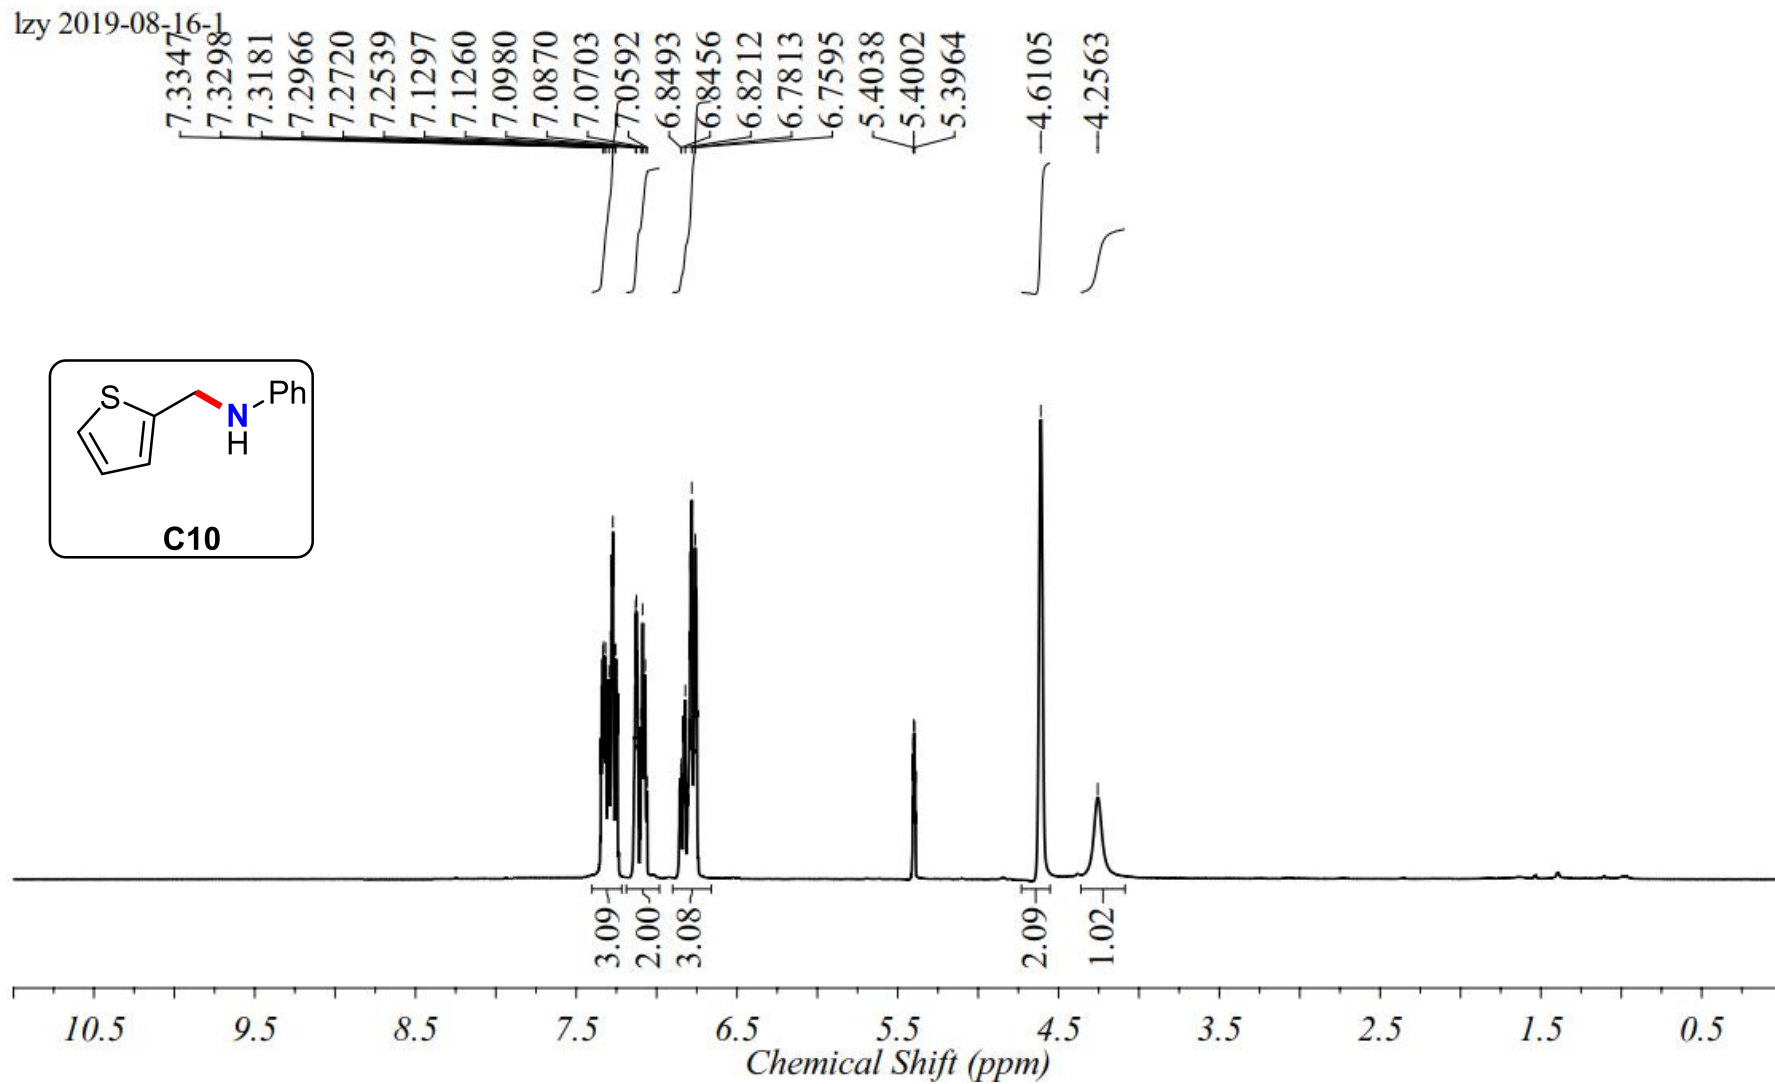

lzy 2019-08-16-1

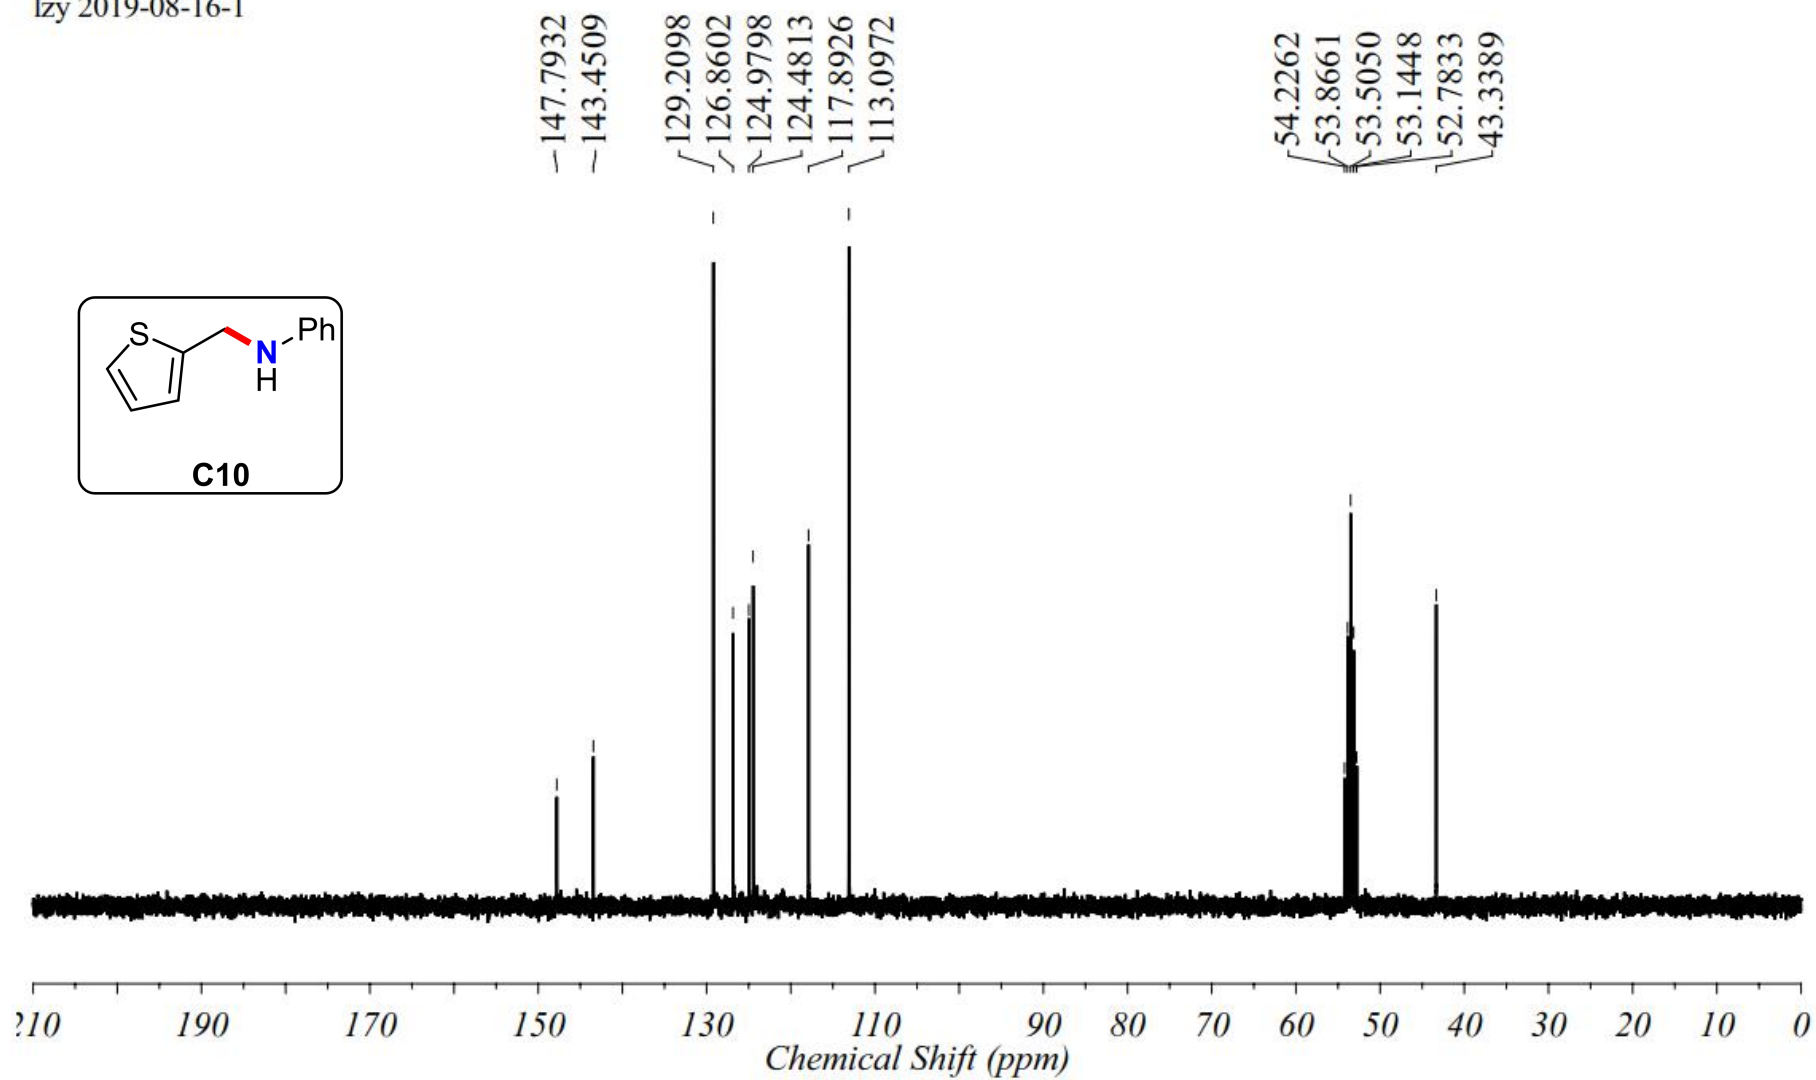

lzy 2019-08-16-2

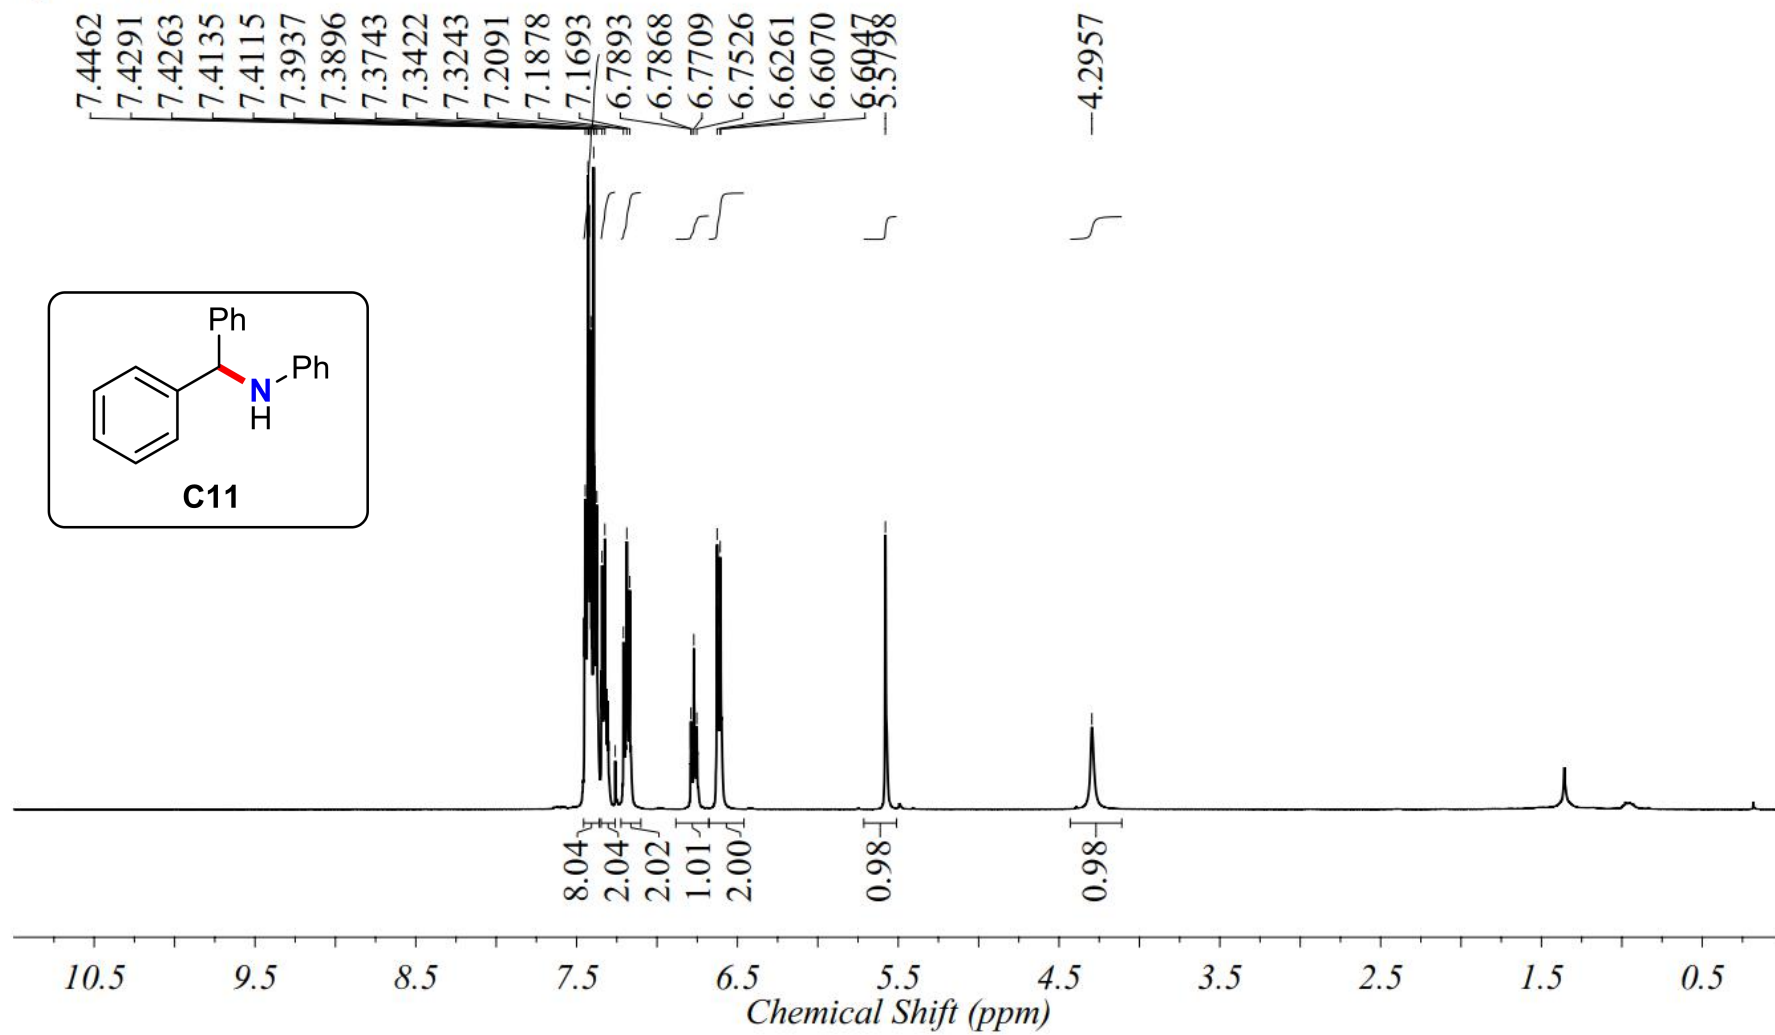

lzy 2019-08-16-2

147.3677  
142.9534  
129.1497  
128.7765  
127.4832  
127.3844  
117.6821  
113.5044

77.4013  
77.0835  
76.7656  
63.0664

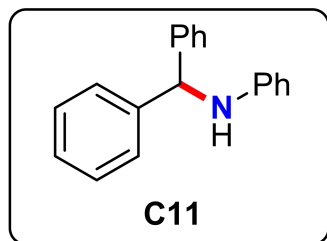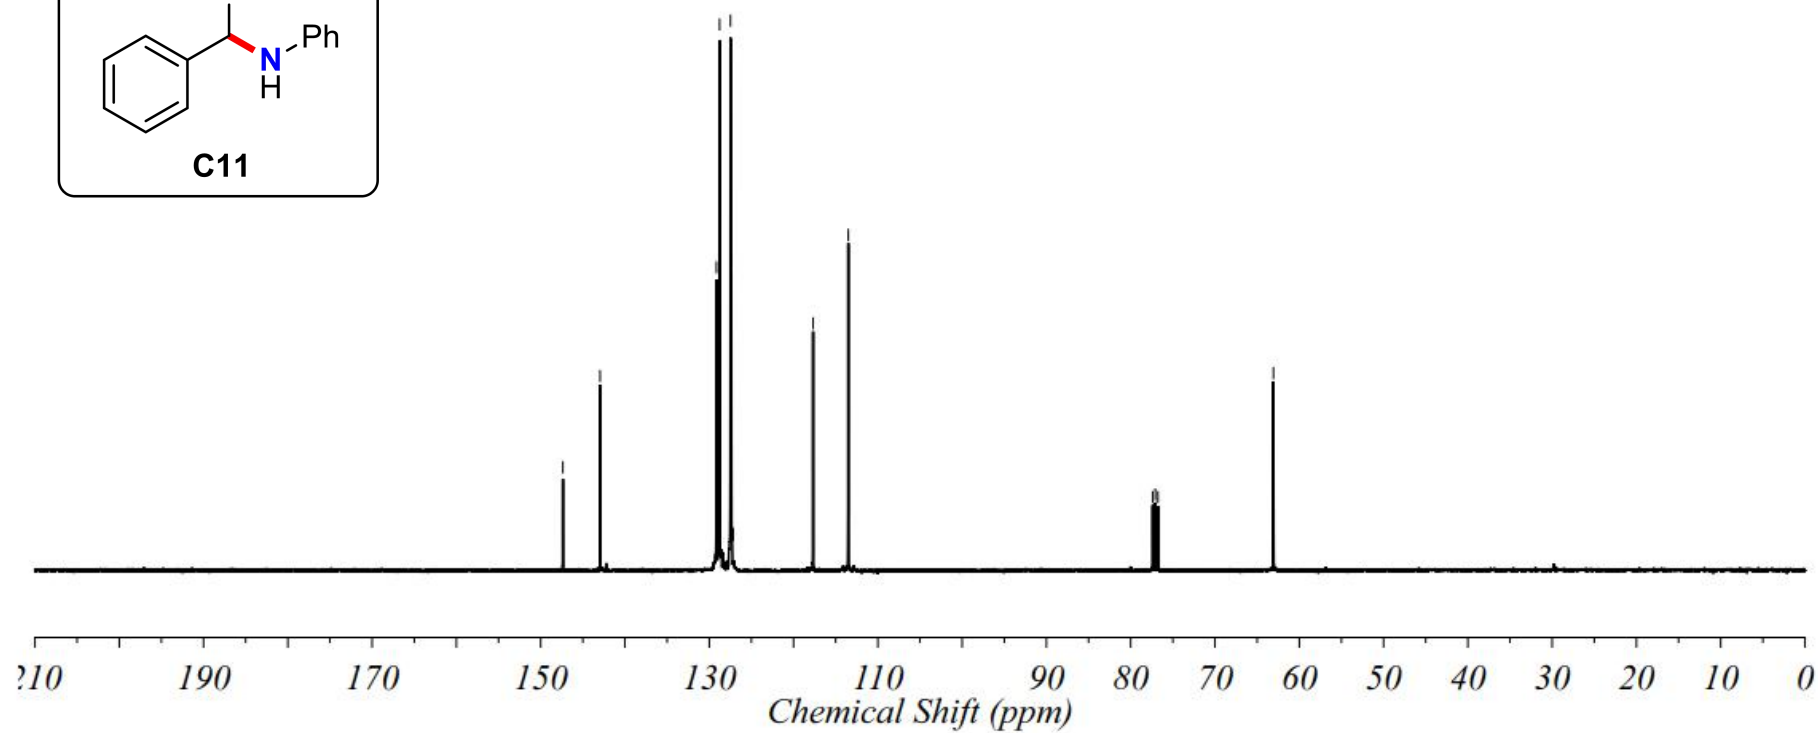



Izy 2019-08-16-3

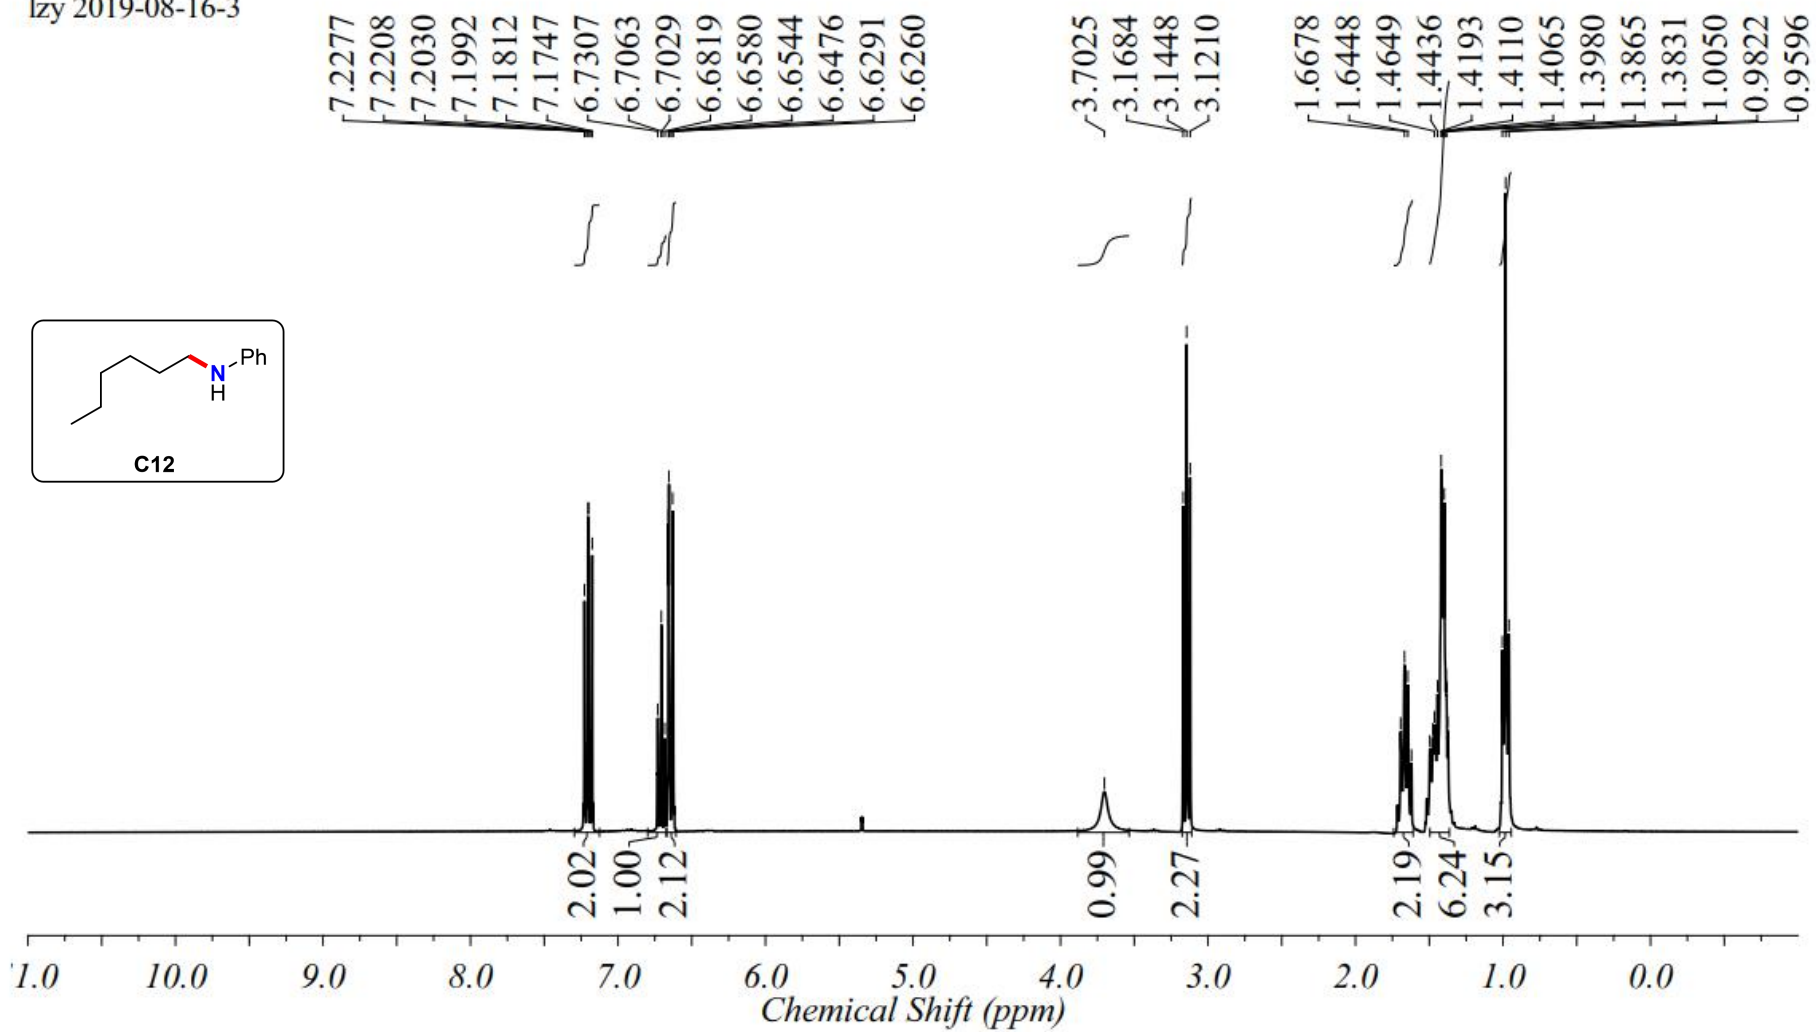

lzy 2019-08-16-3

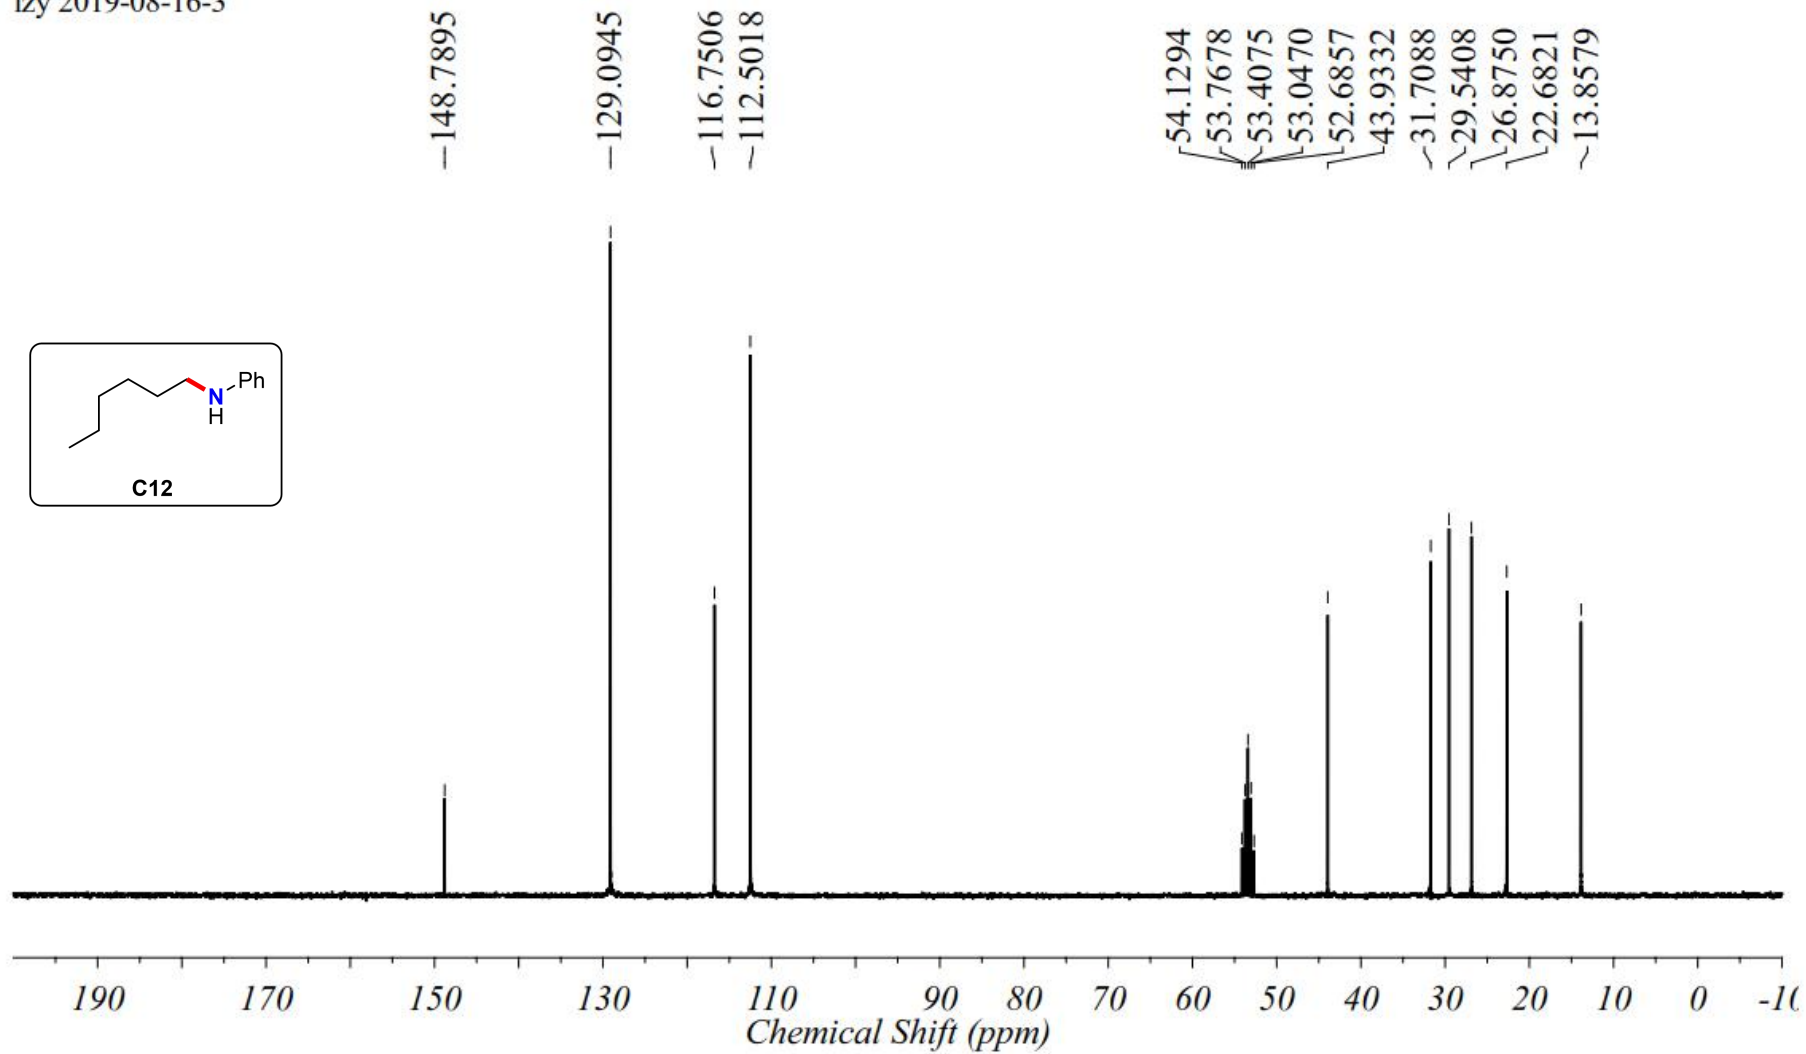

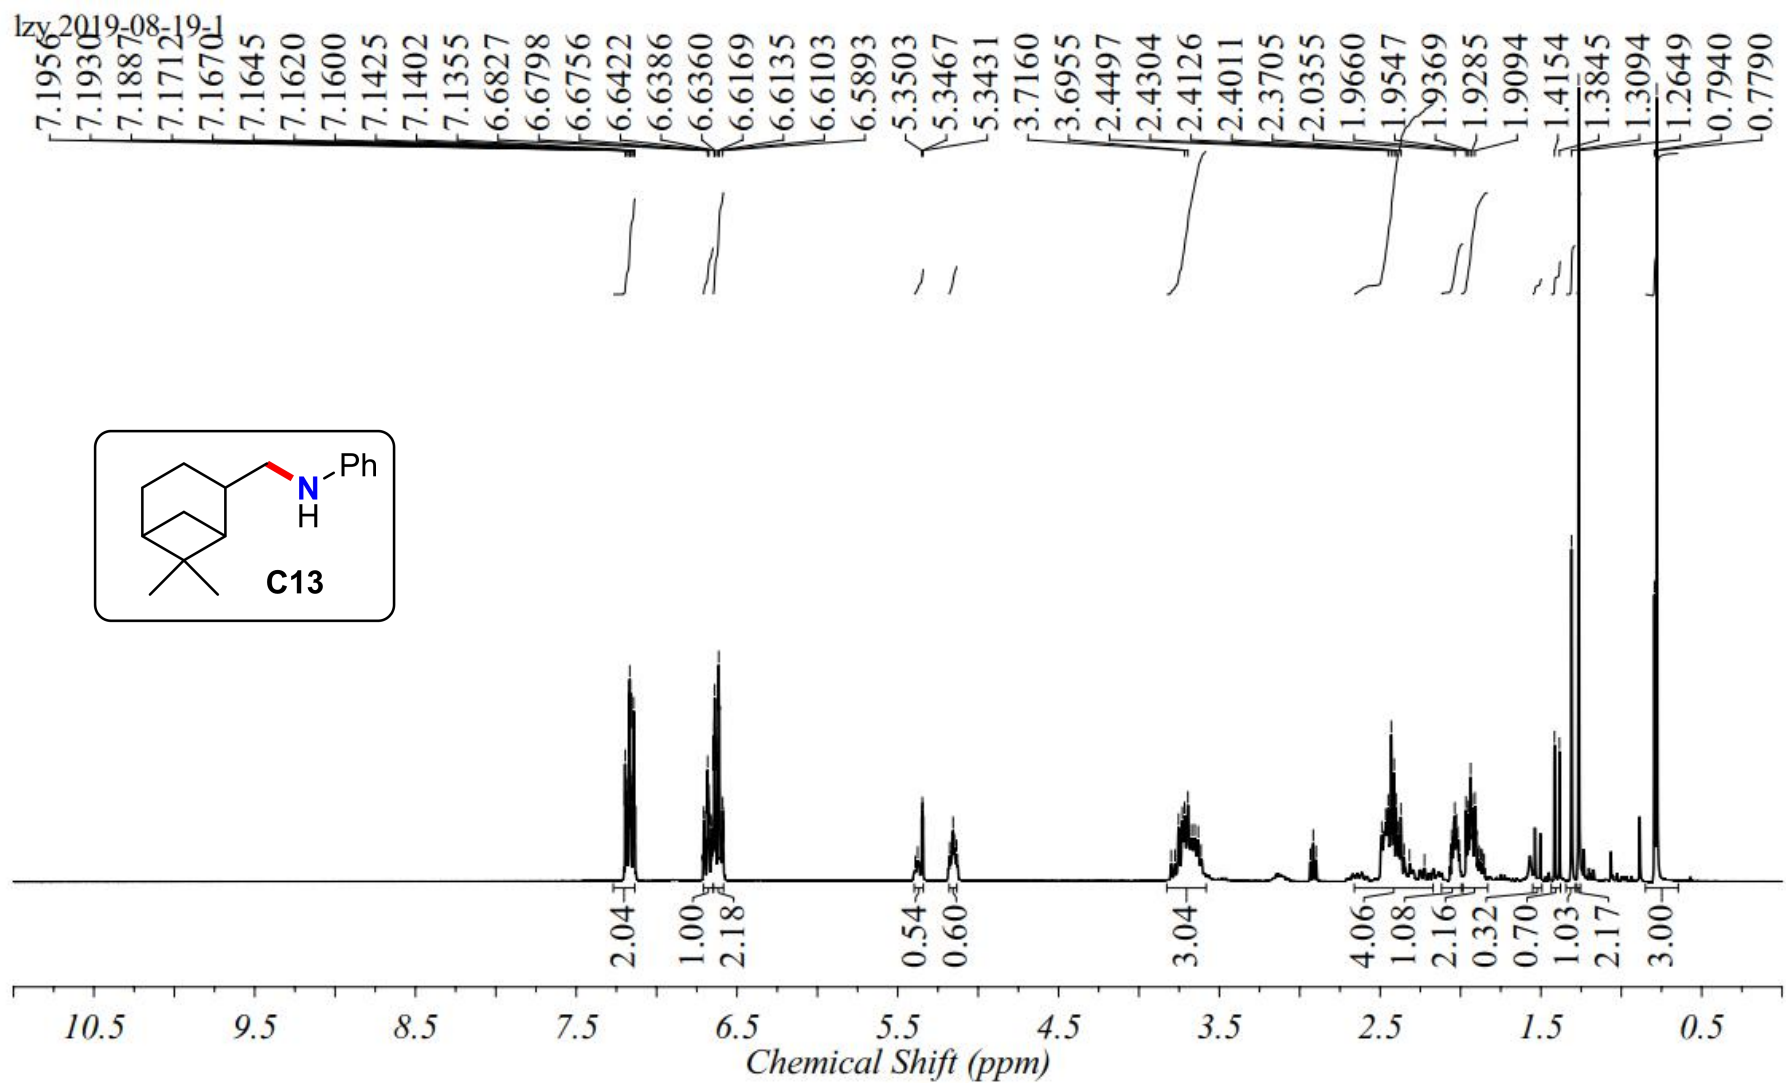

lzy 2019-08-19-1

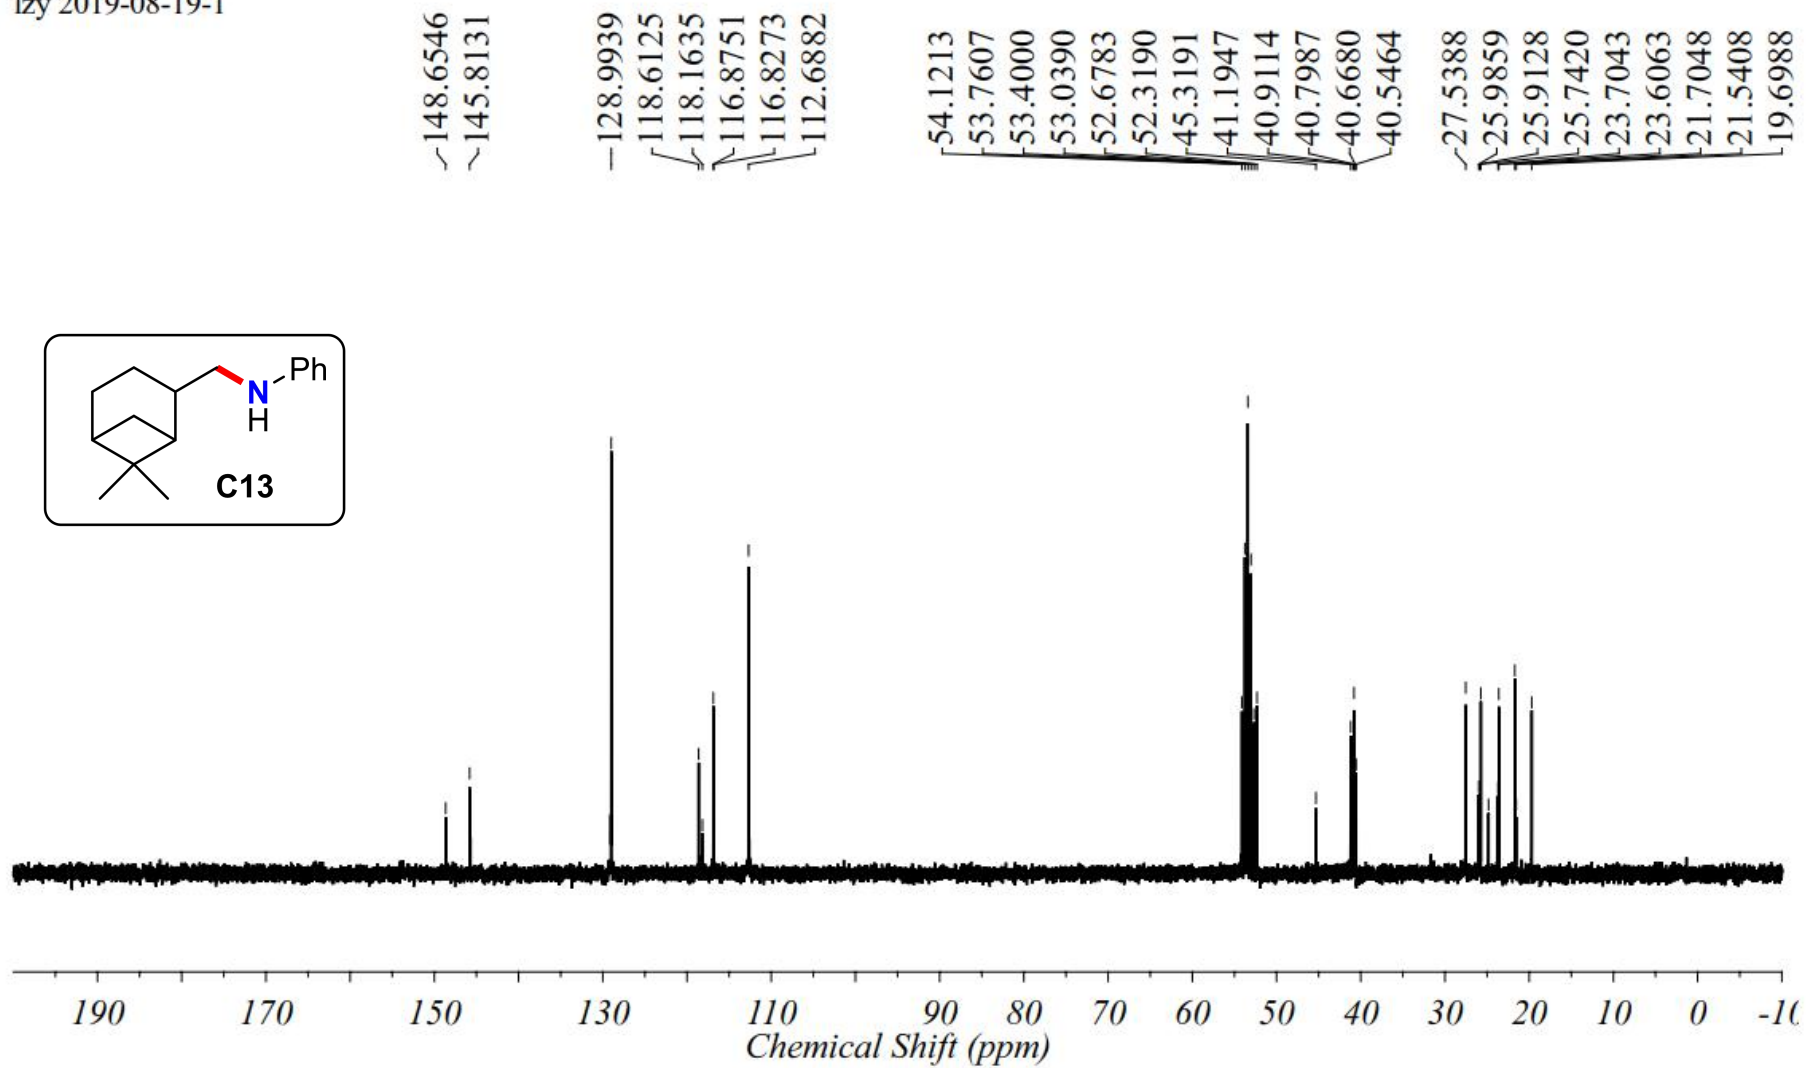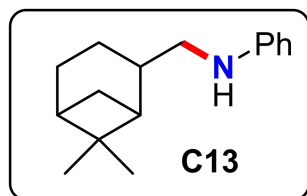

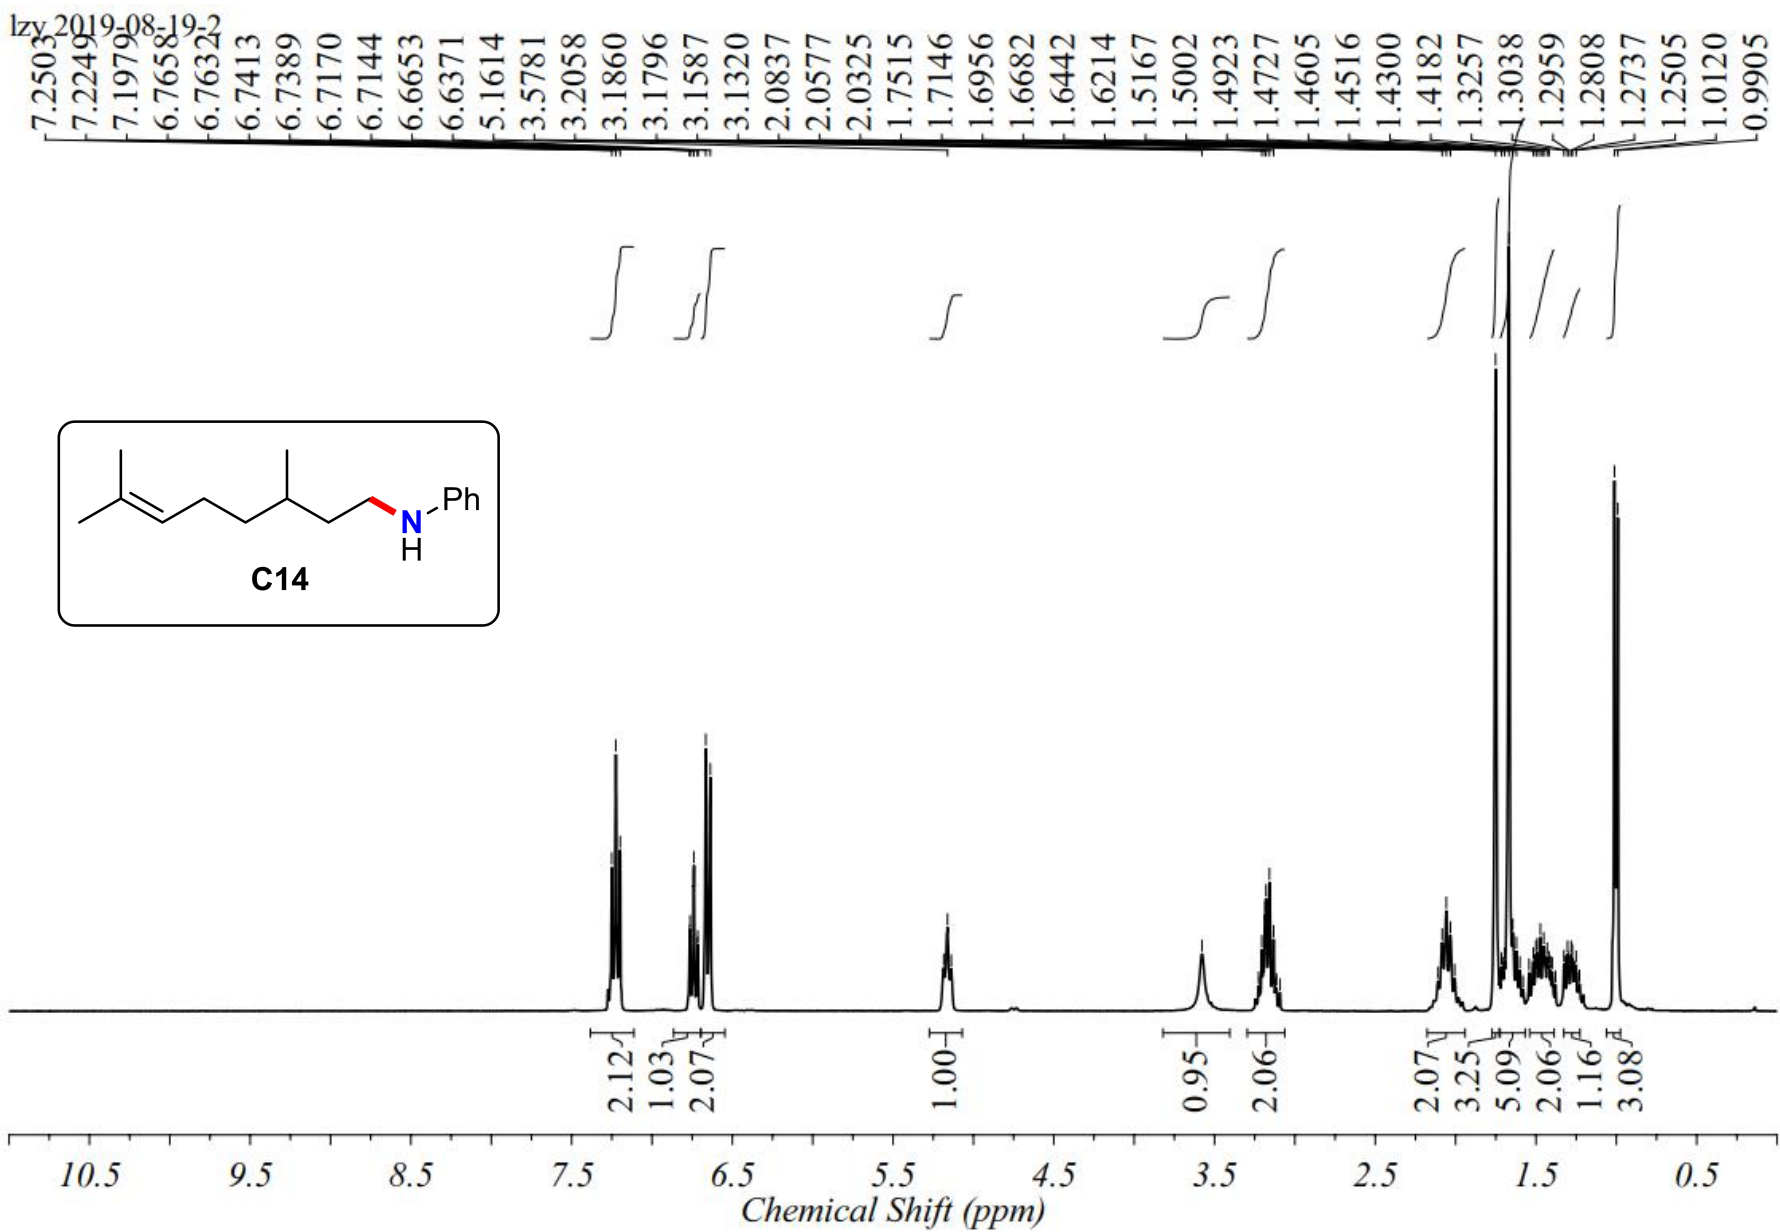

lzy 2019-08-19-2

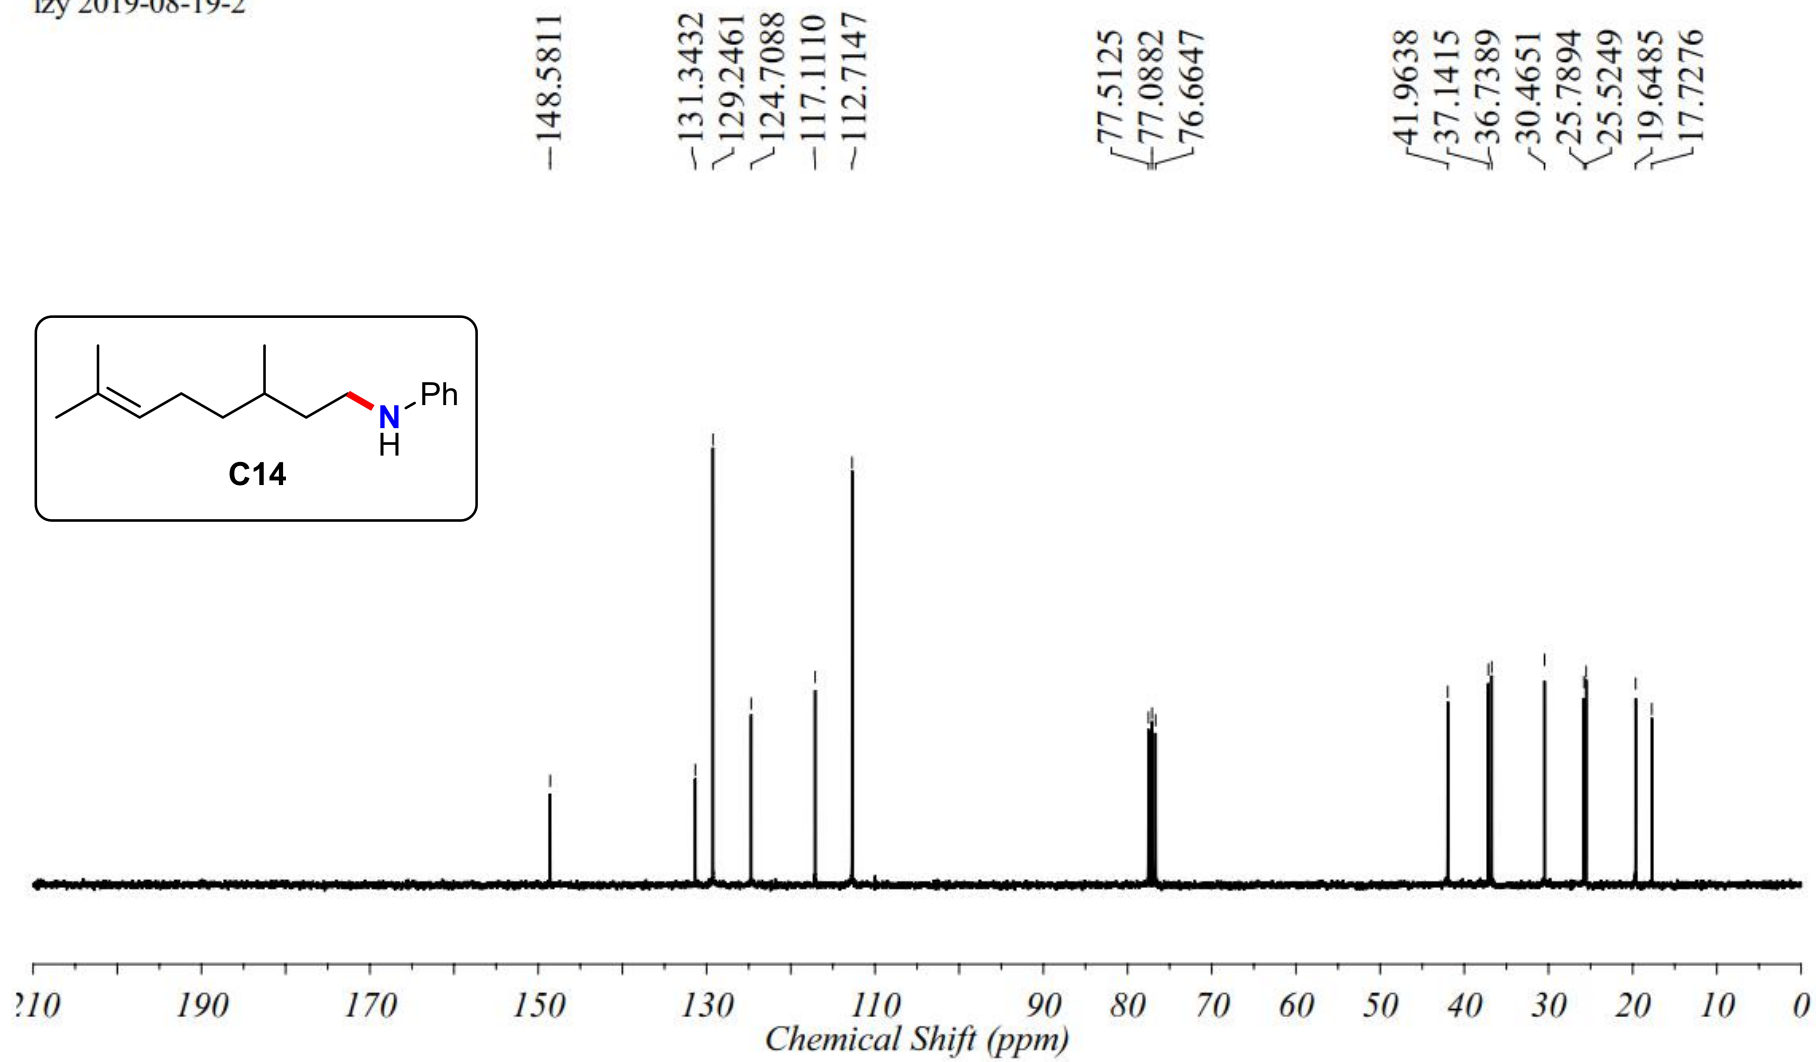

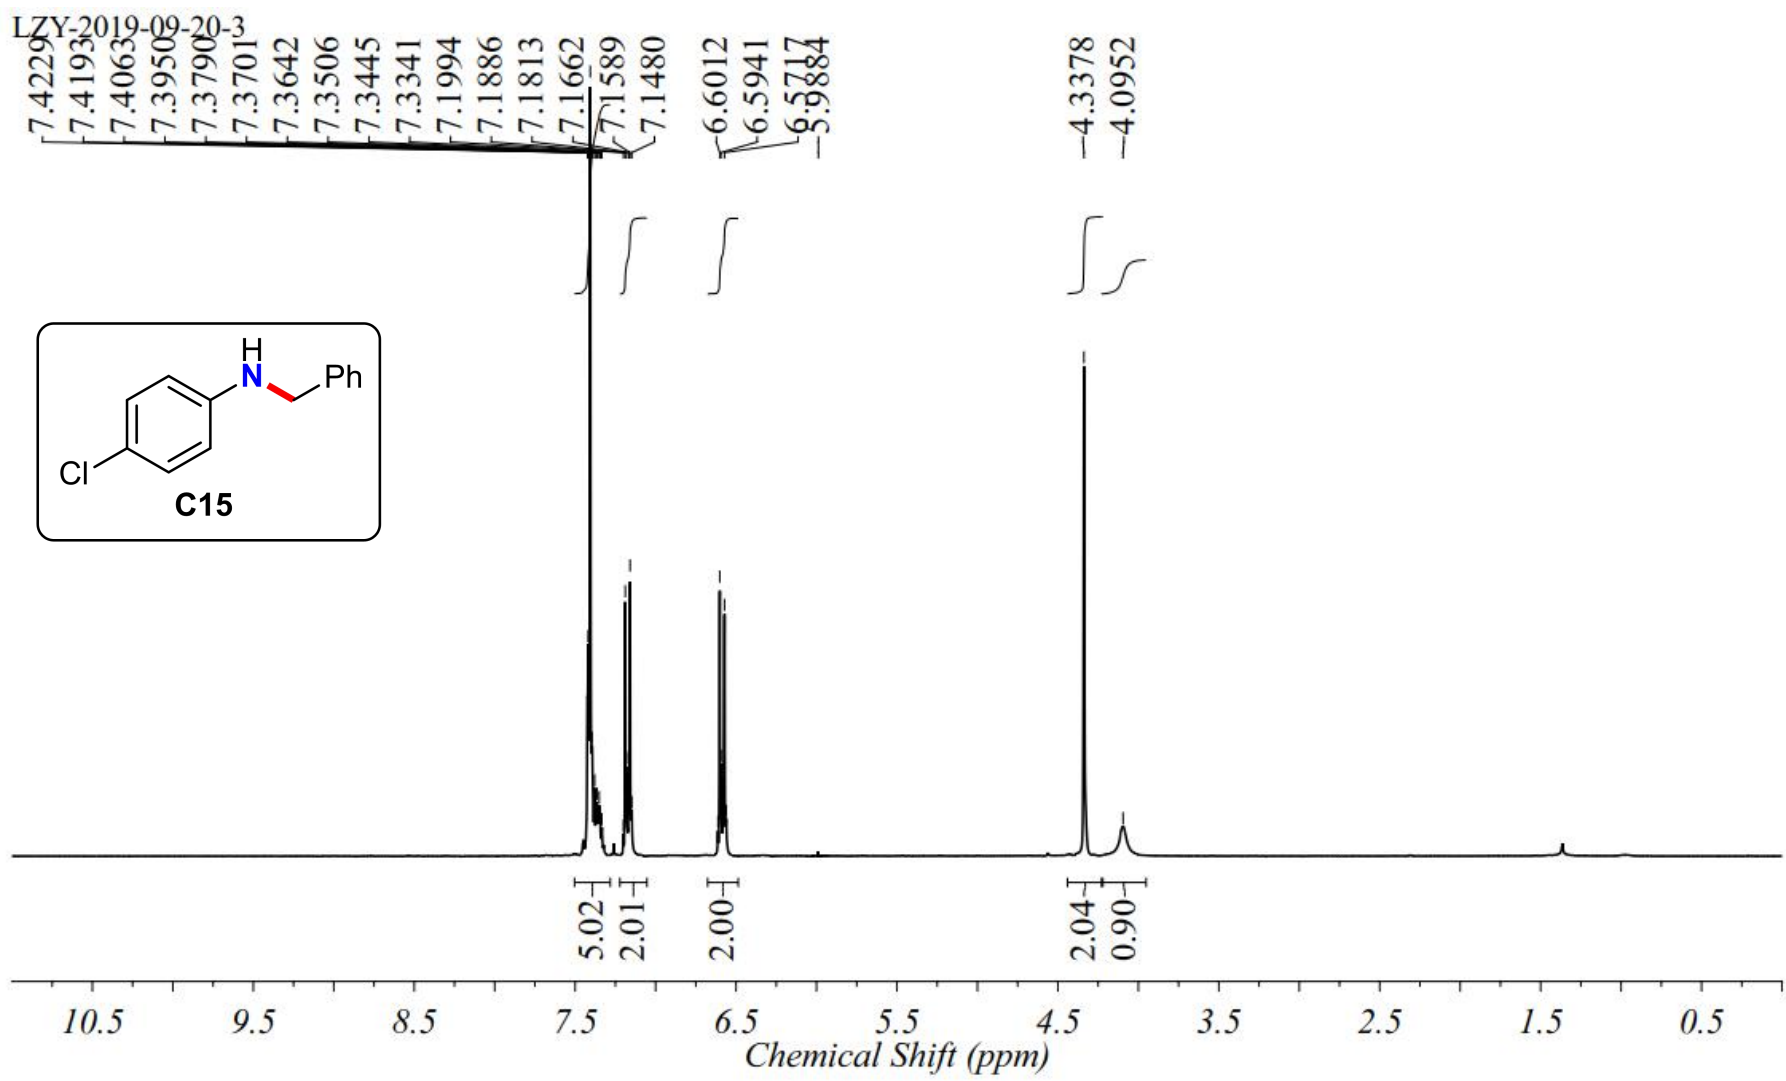

LZY-2019-09-20-3

-146.5474  
-138.8435  
-128.9597  
-128.6026  
-127.3051  
-127.2652  
-121.9131  
-113.8208  
-109.7993  
  
77.4244  
77.0002  
76.5756  
  
-48.1830

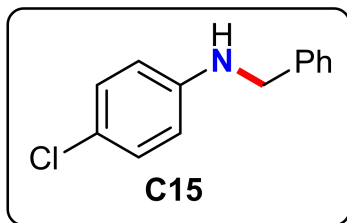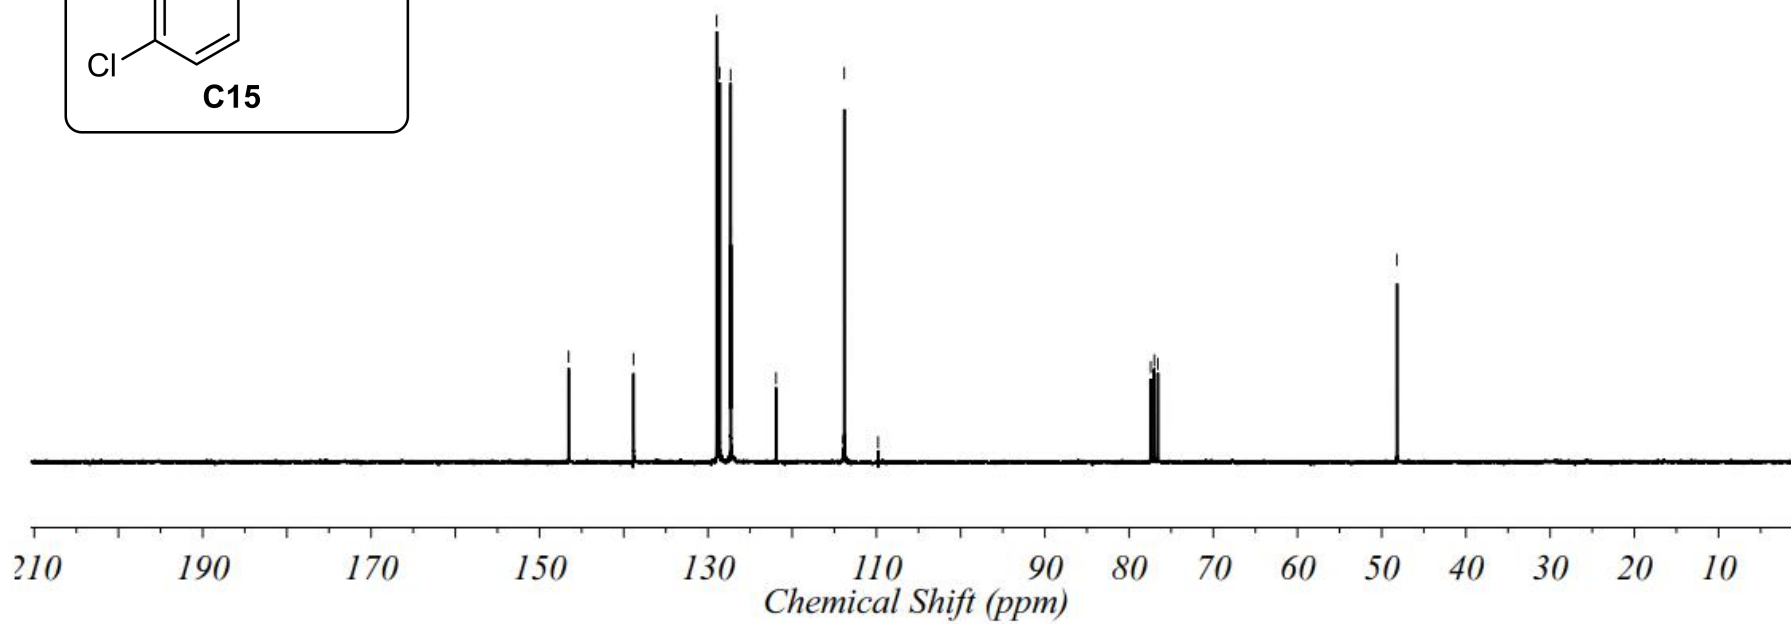



LZY-2019-09-20-5

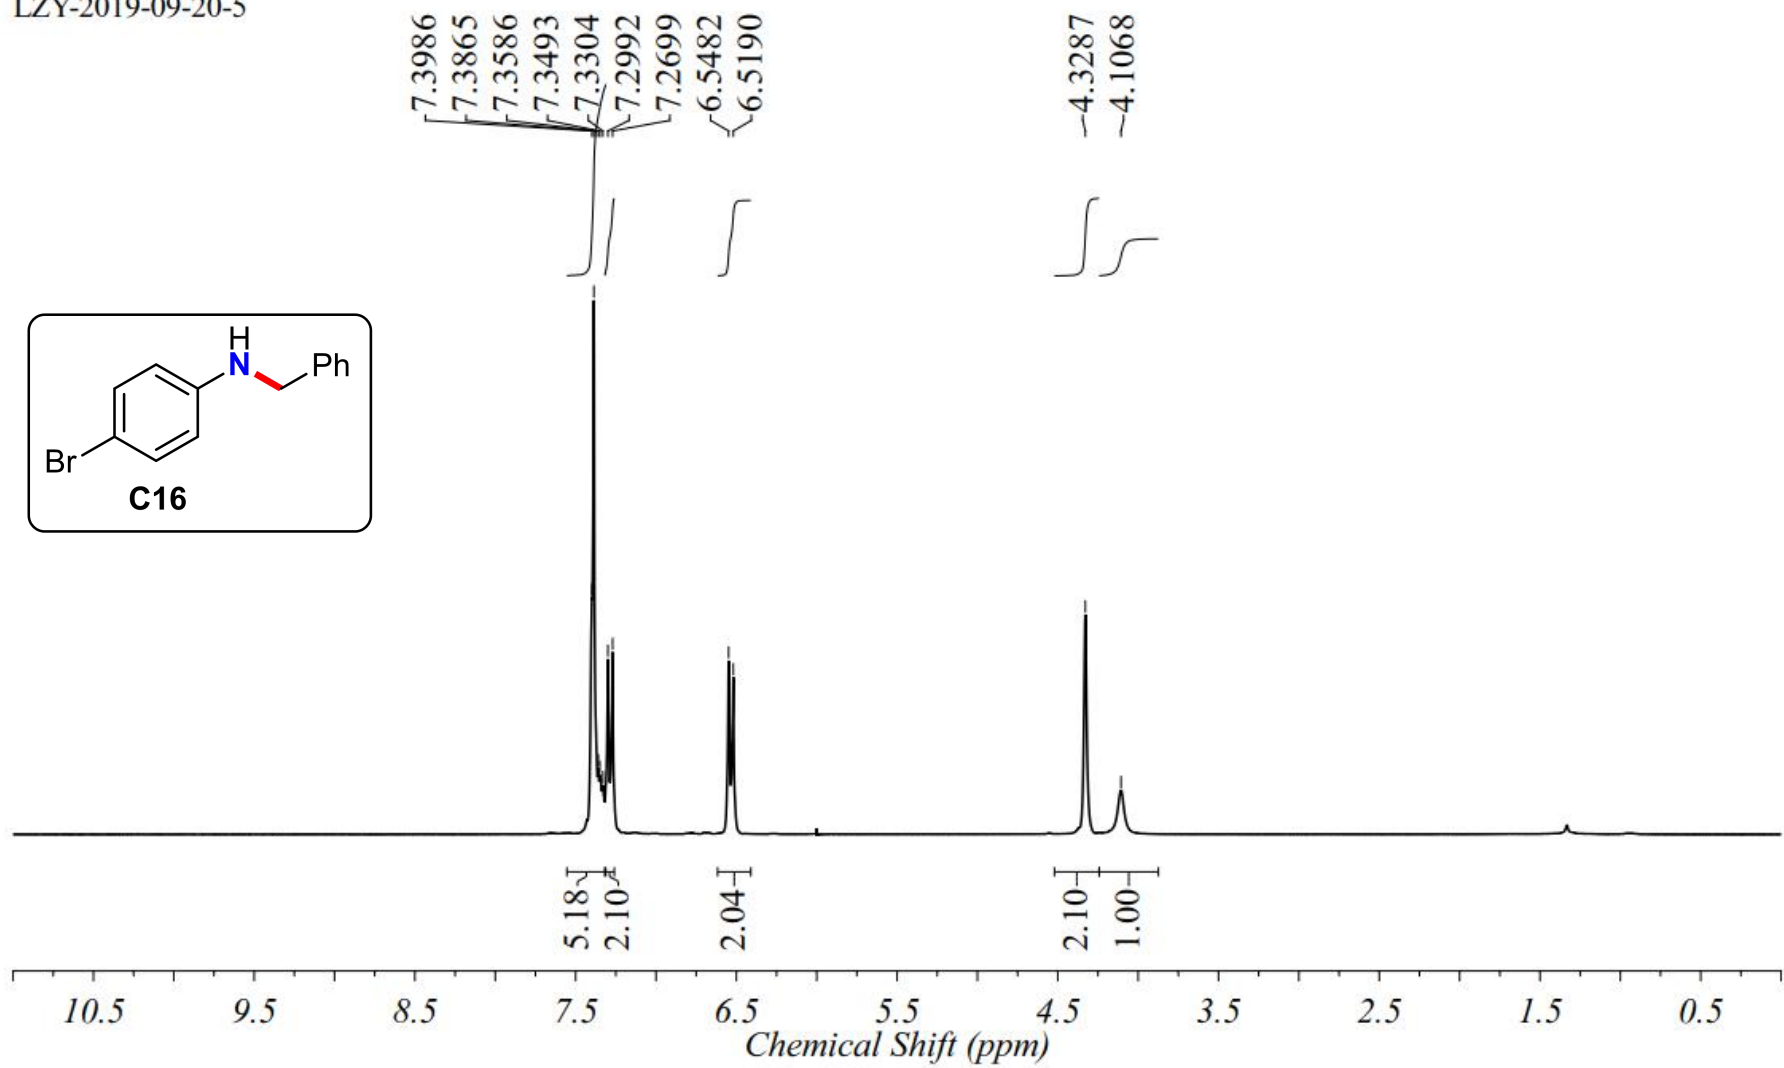

LZY-2019-09-20-5

-146.9624  
138.7830  
131.8416  
128.6258  
127.3080  
  
-114.3359  
-108.9945  
  
77.4241  
77.0000  
76.5762  
  
-48.1107

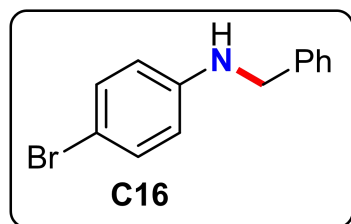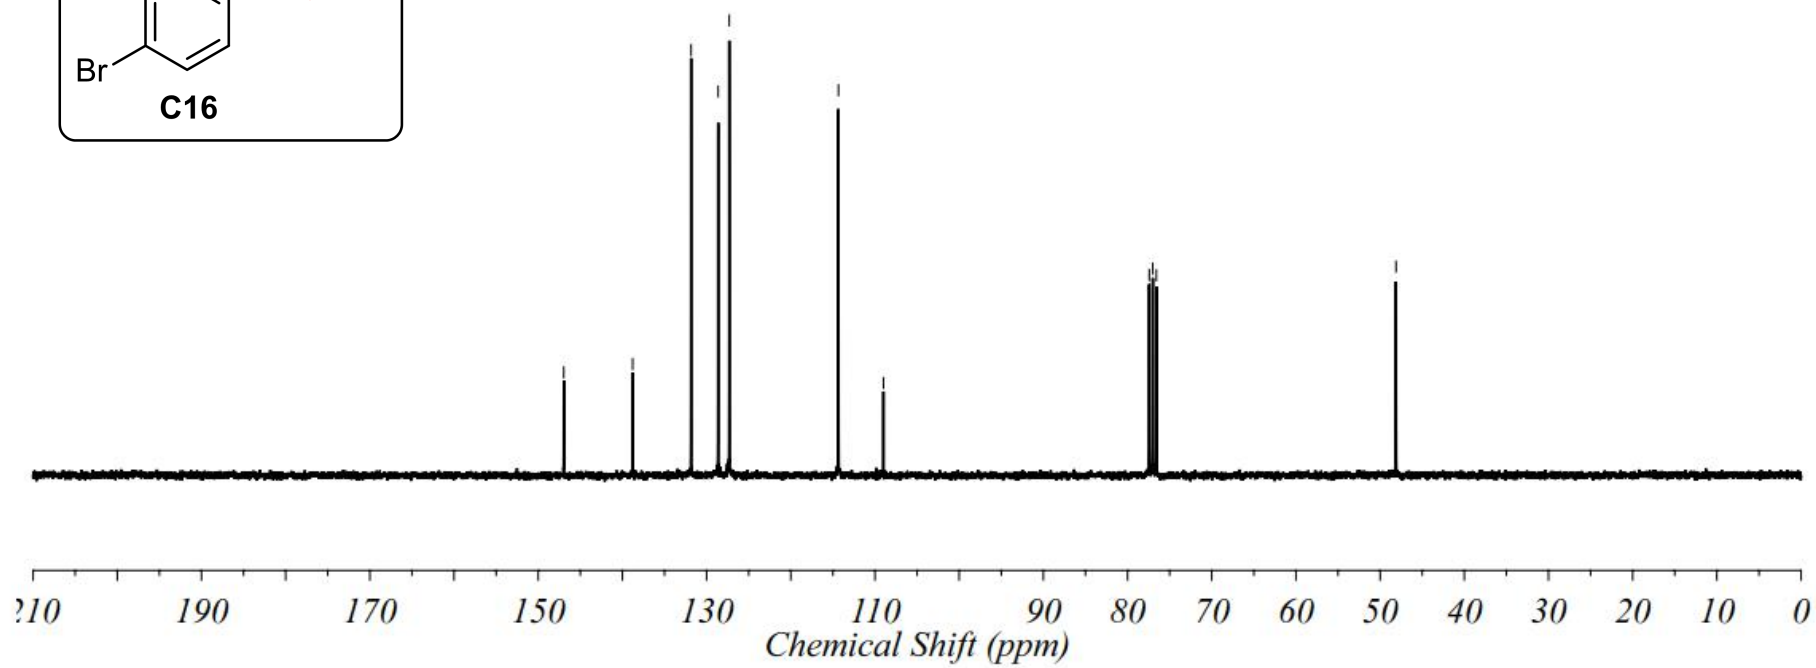

LZY-2019-09-25-1

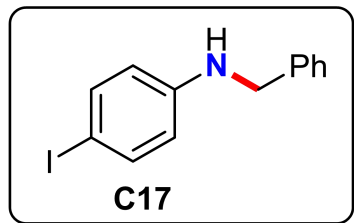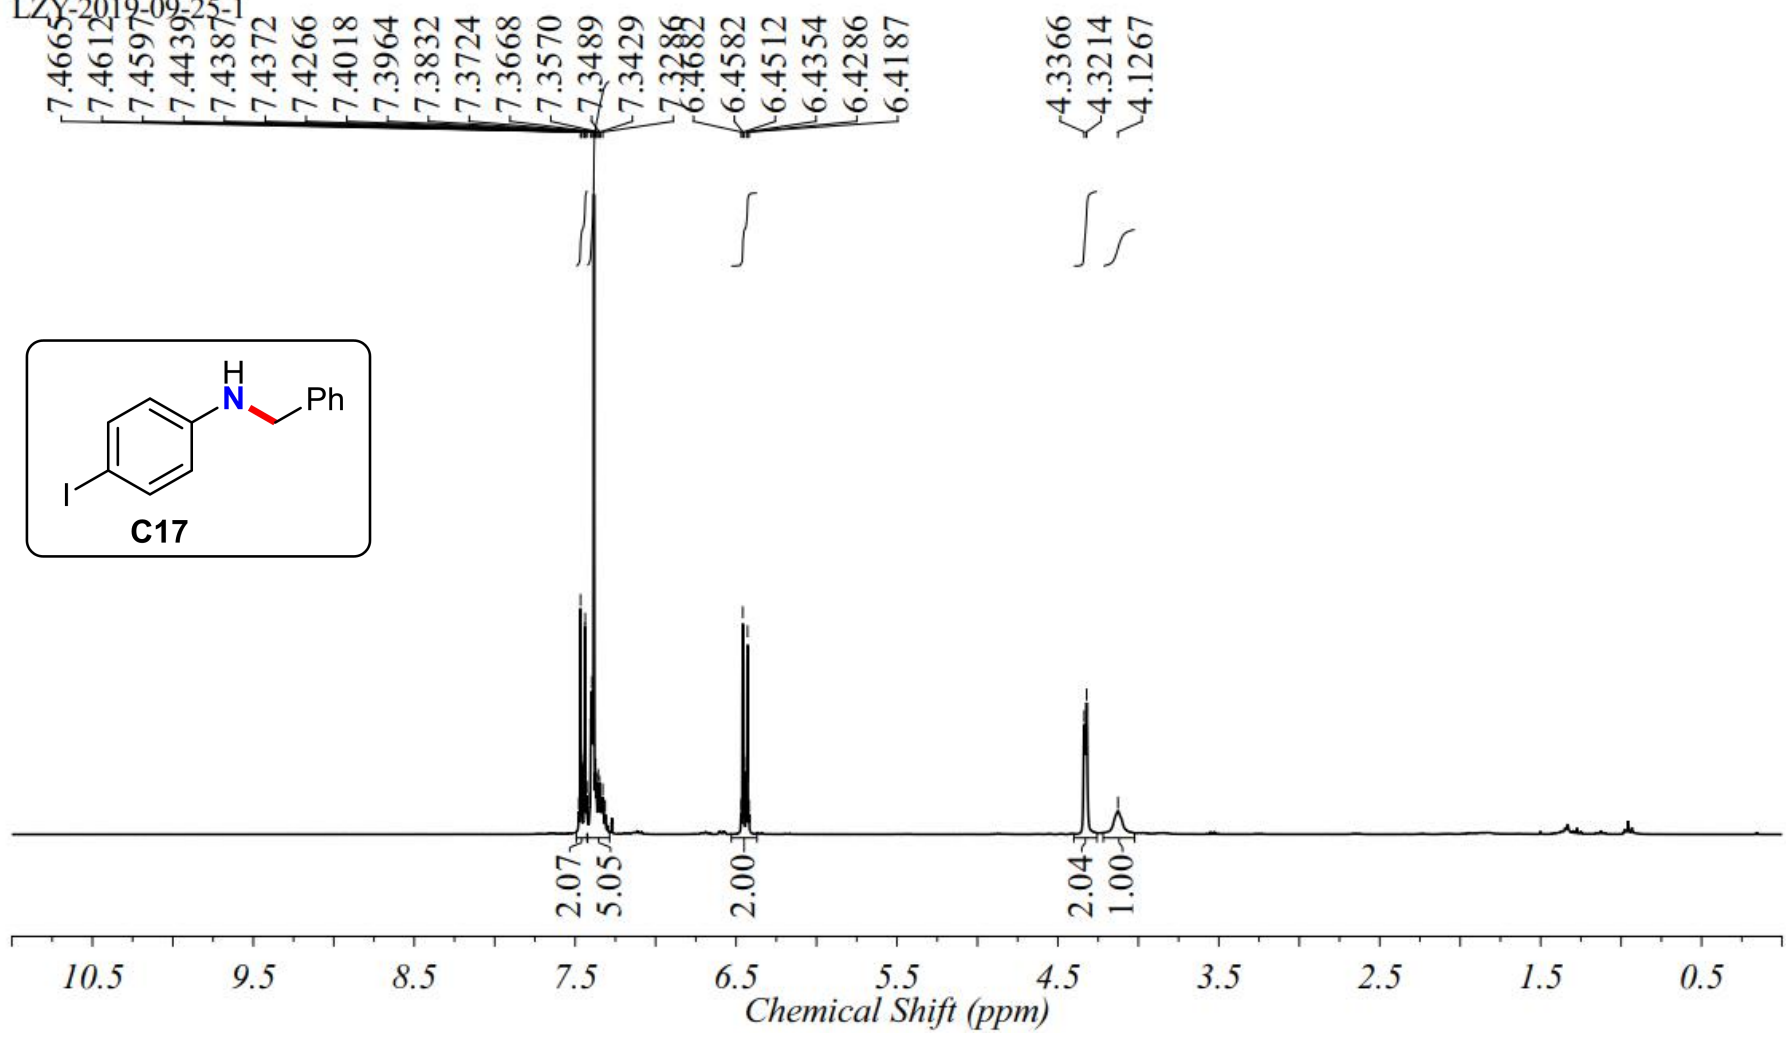

LZY-2019-09-25-1

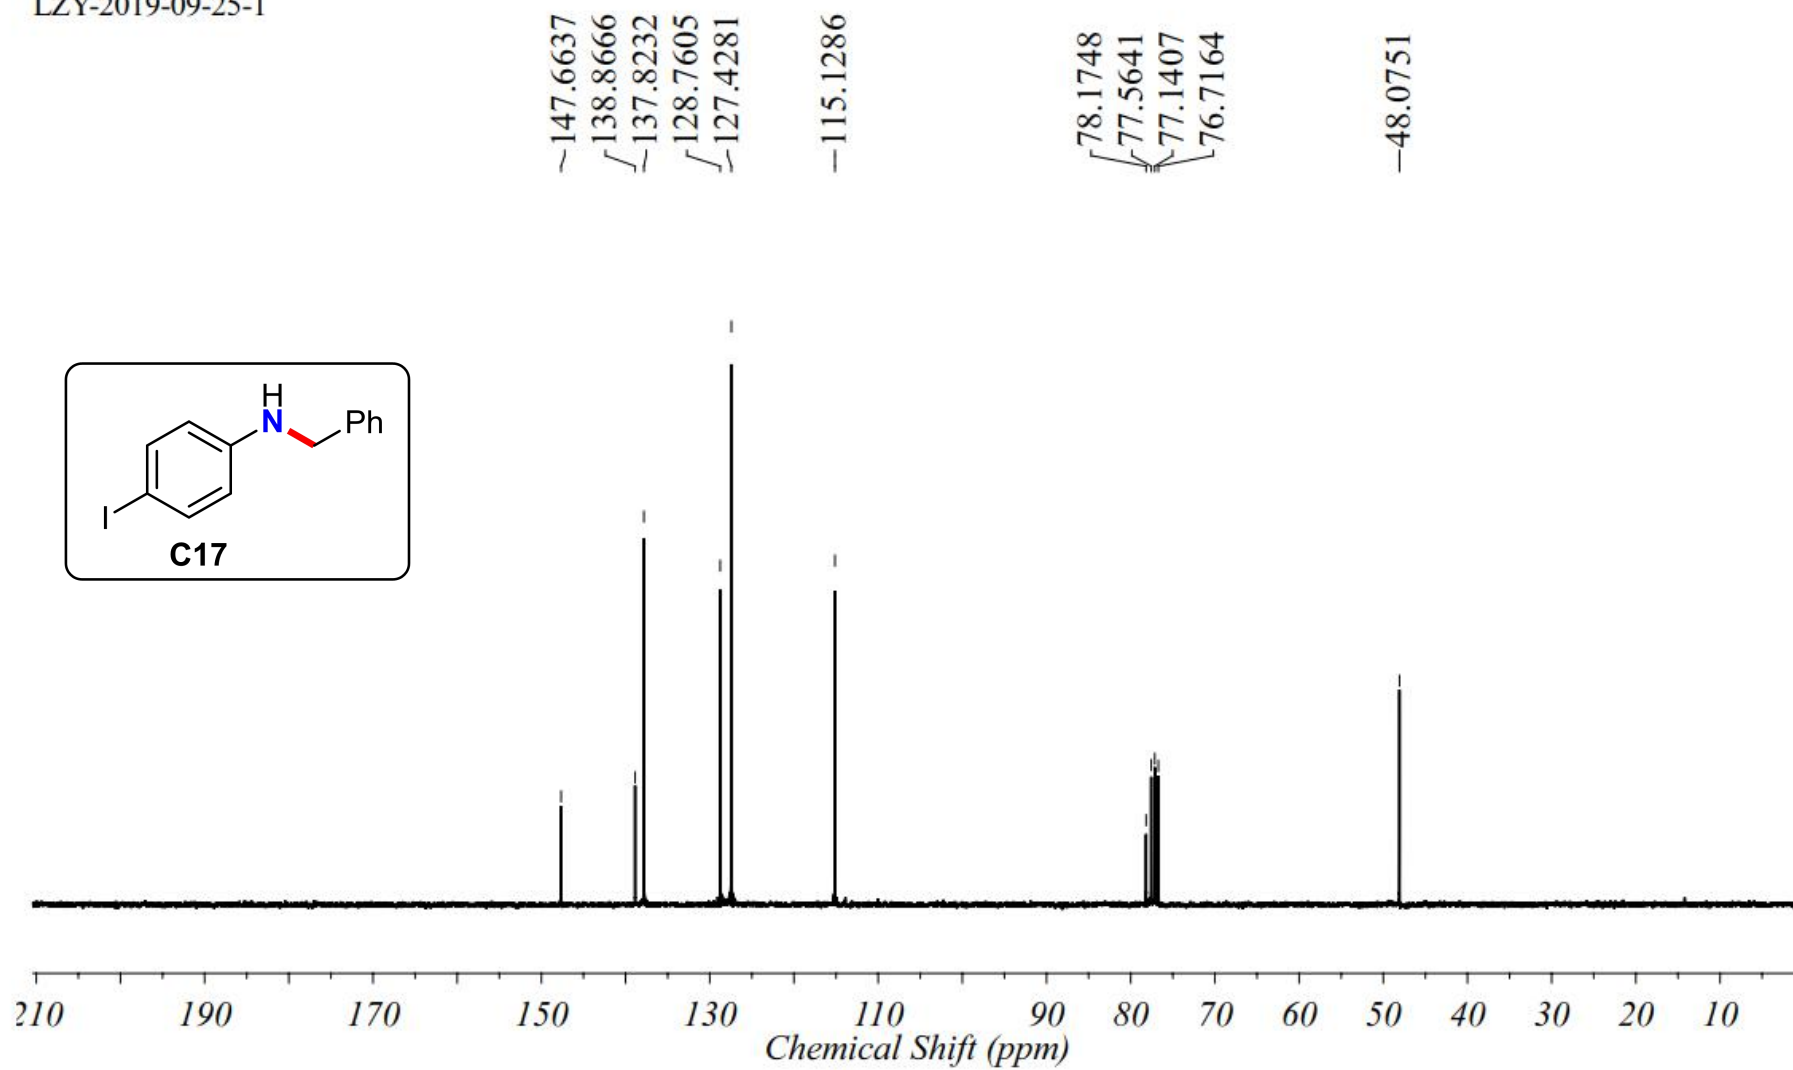

LZY-2019-09-25-2

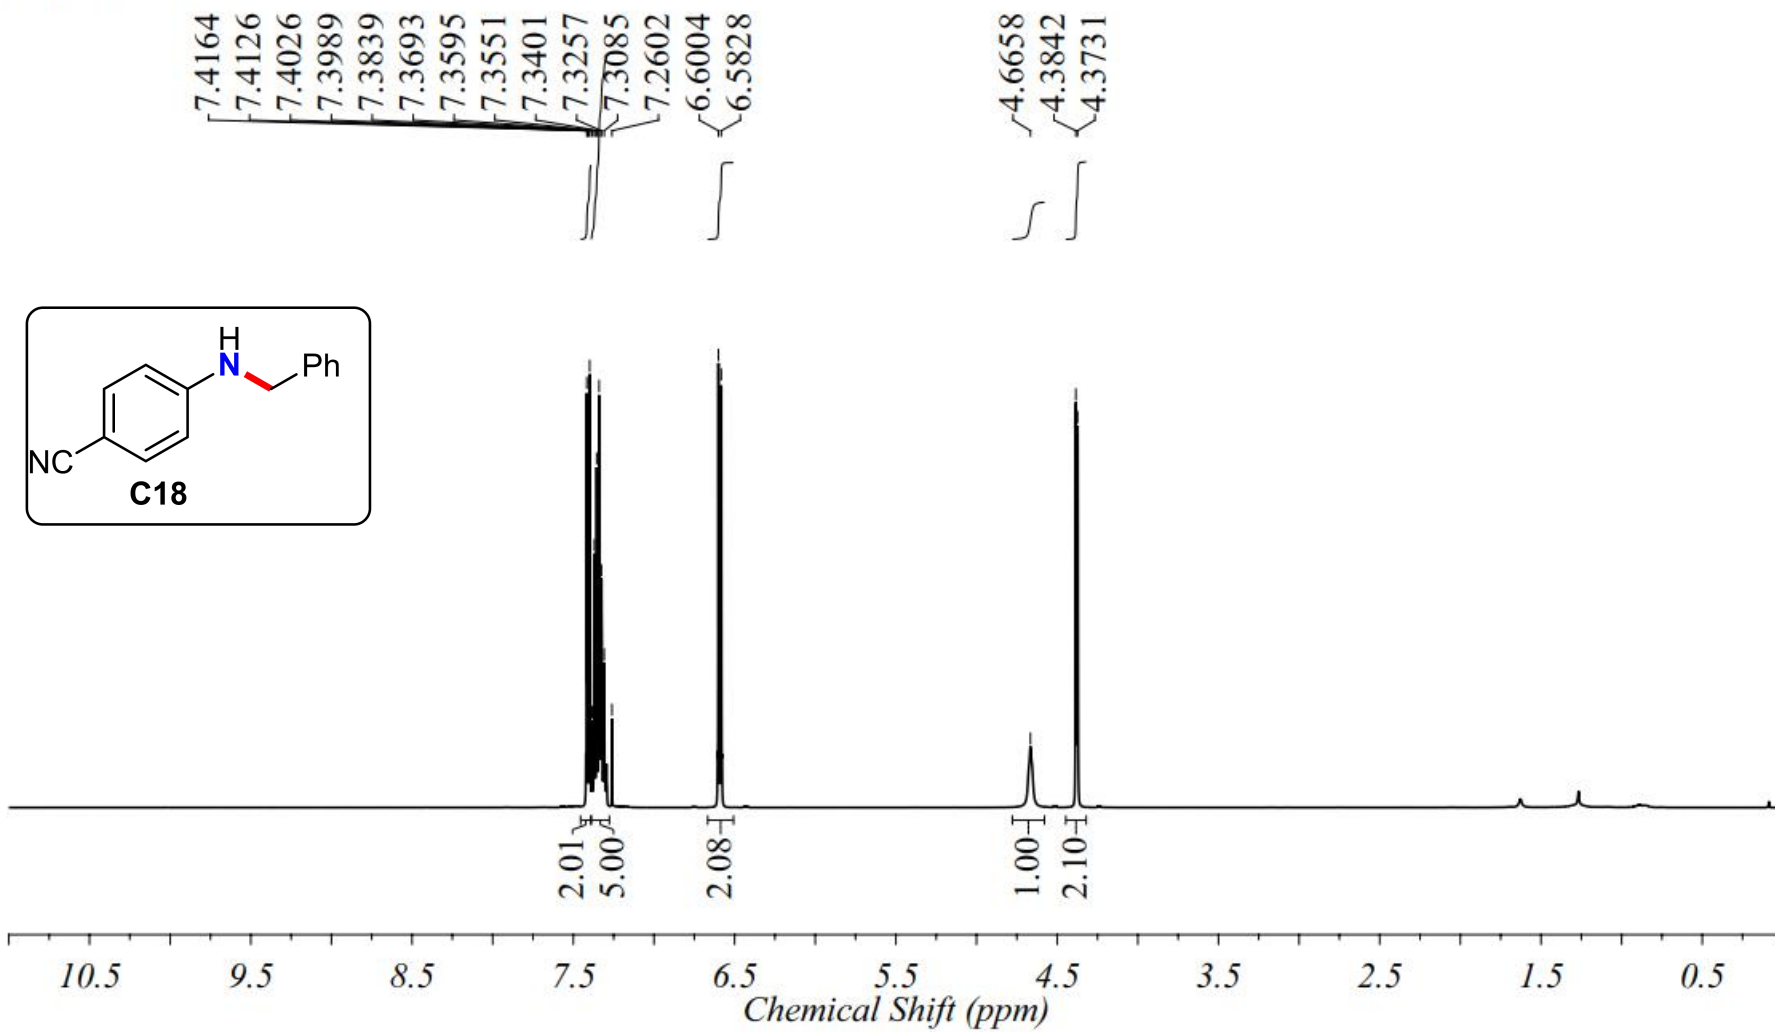

LZY-2019-09-25-2

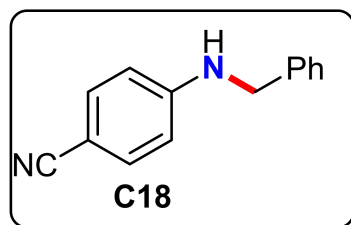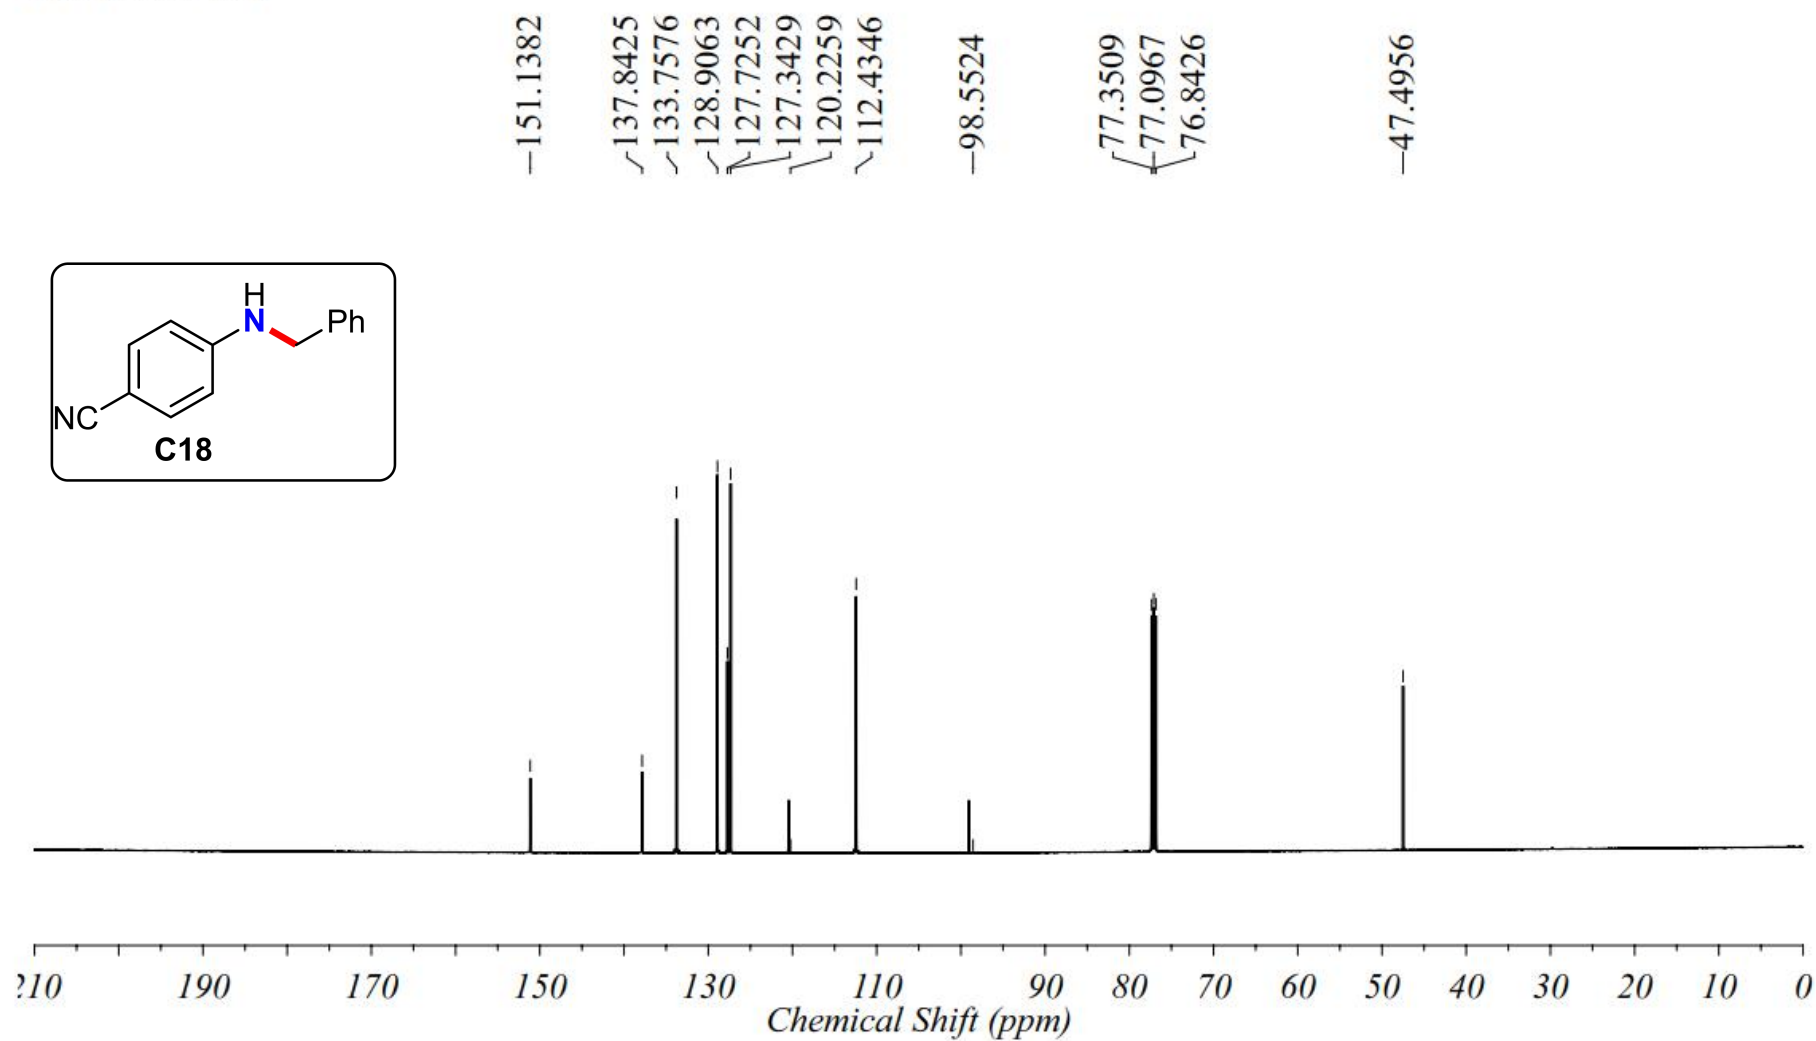

LZY-2019-09-25\_3

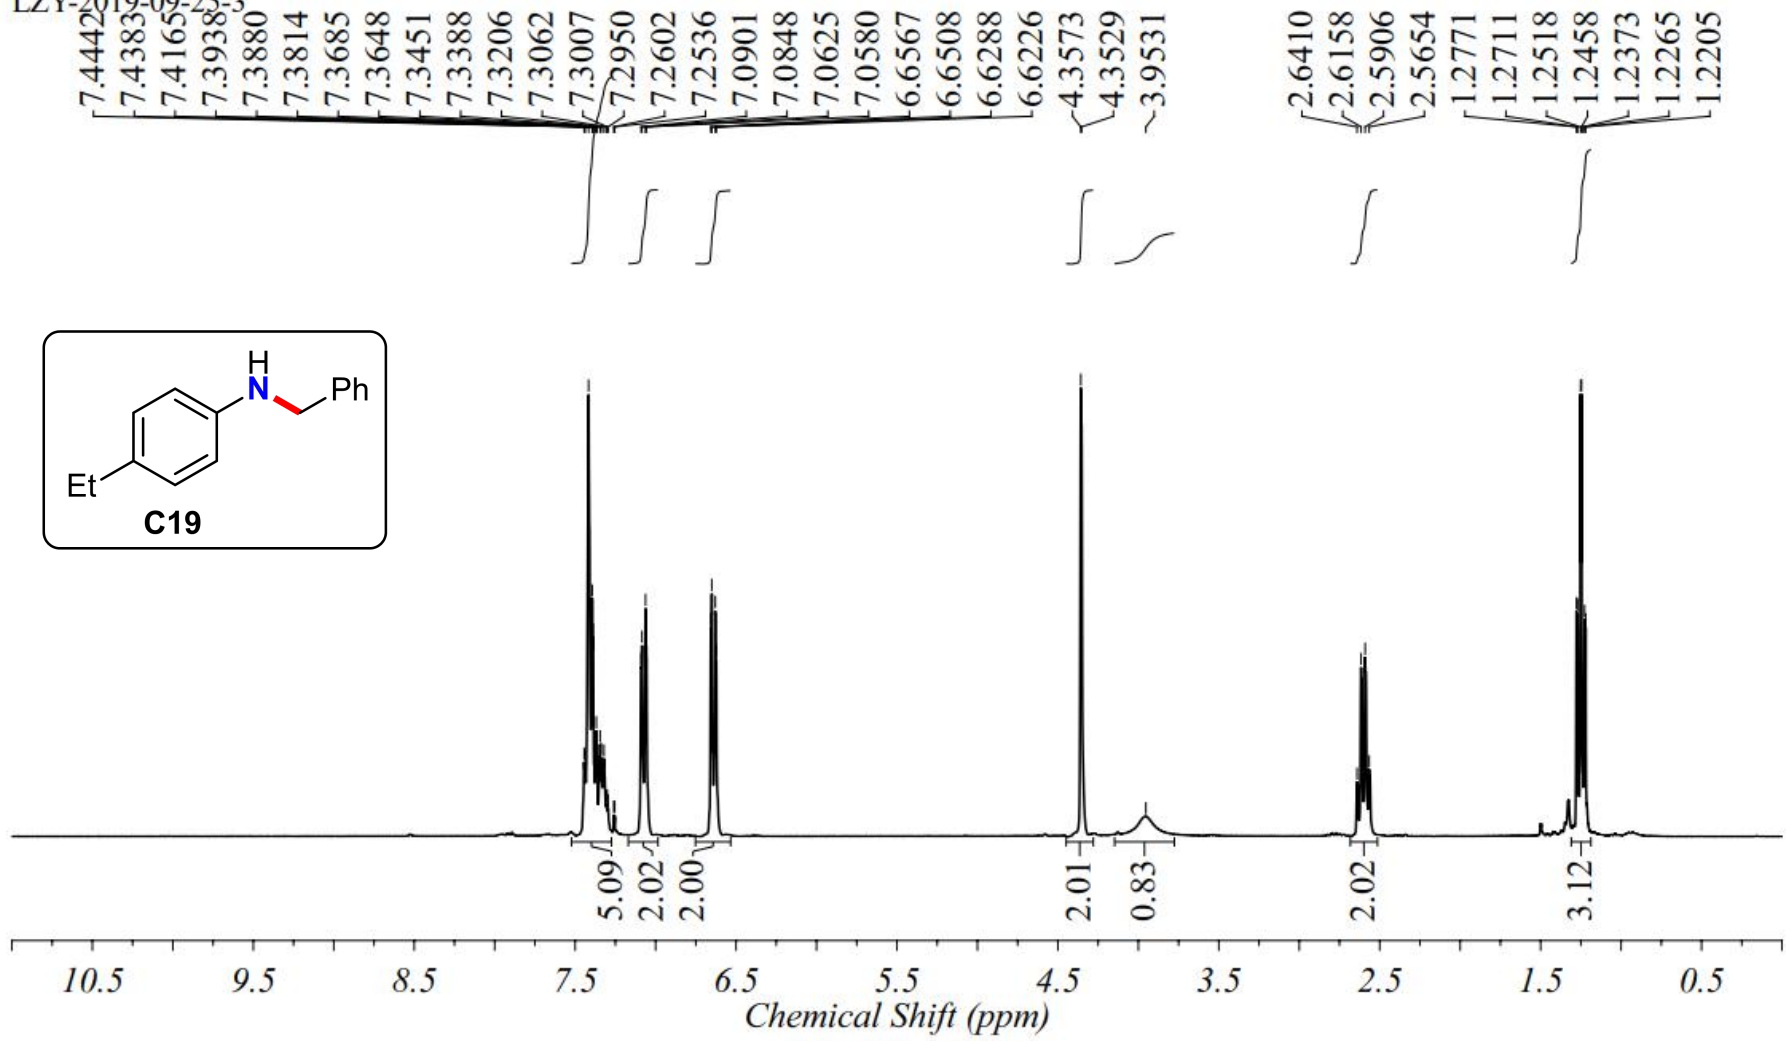

LZY-2019-09-25-3

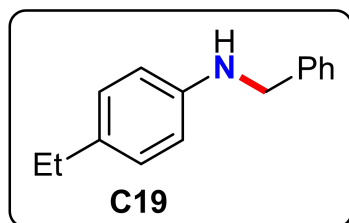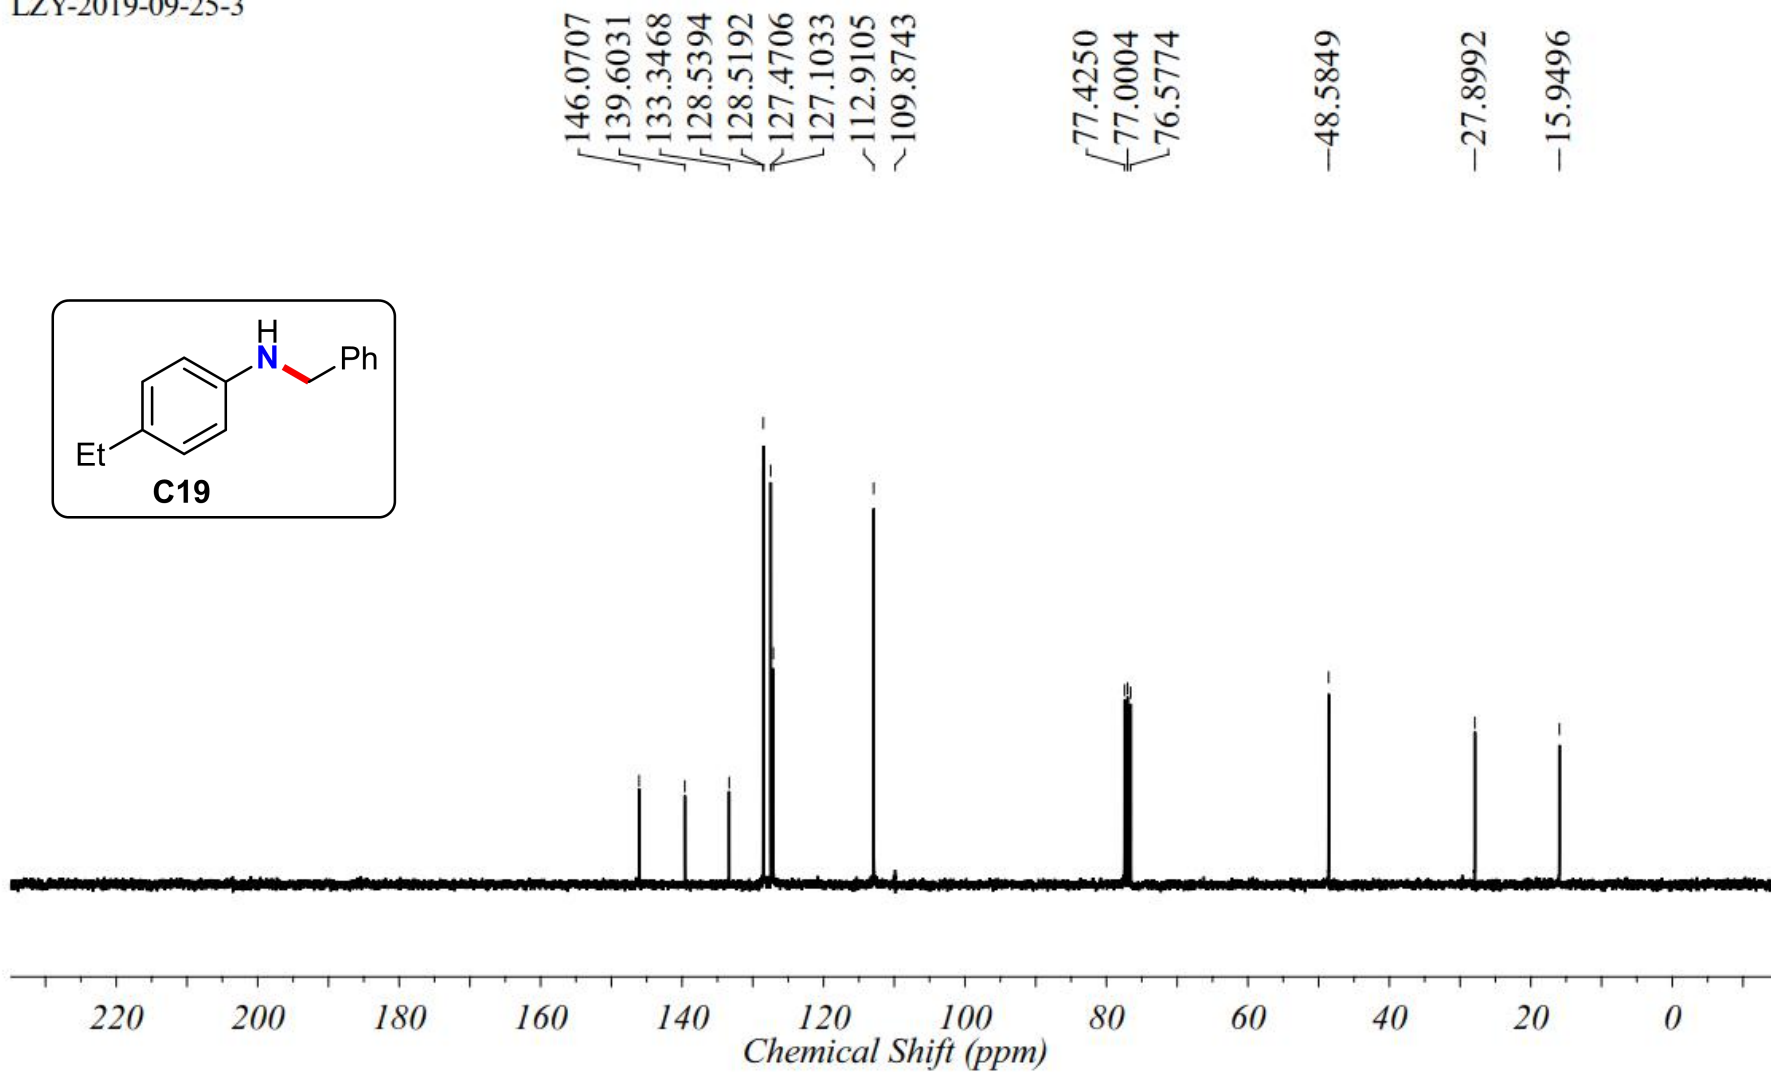



LZY-2019-09-25-4

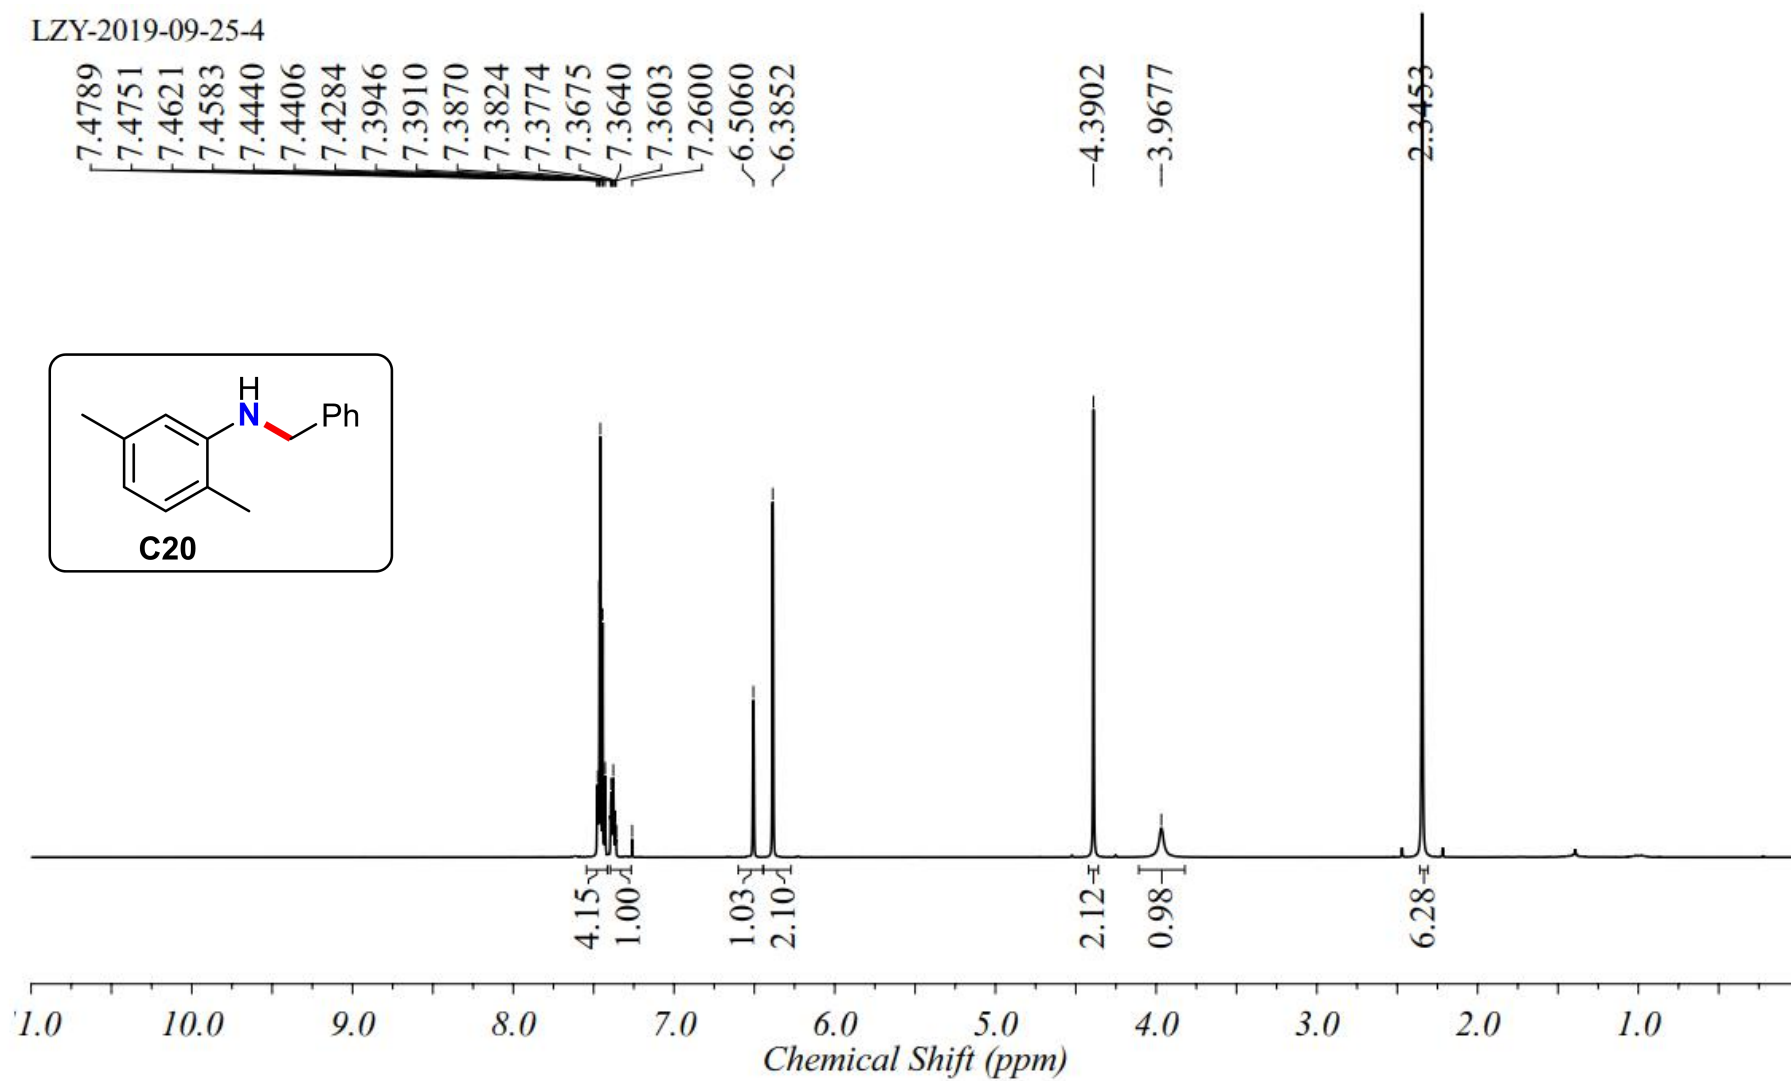

LZY-2019-09-25-4

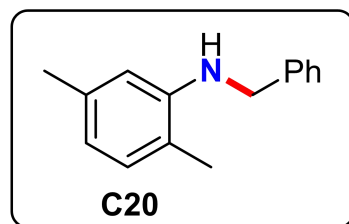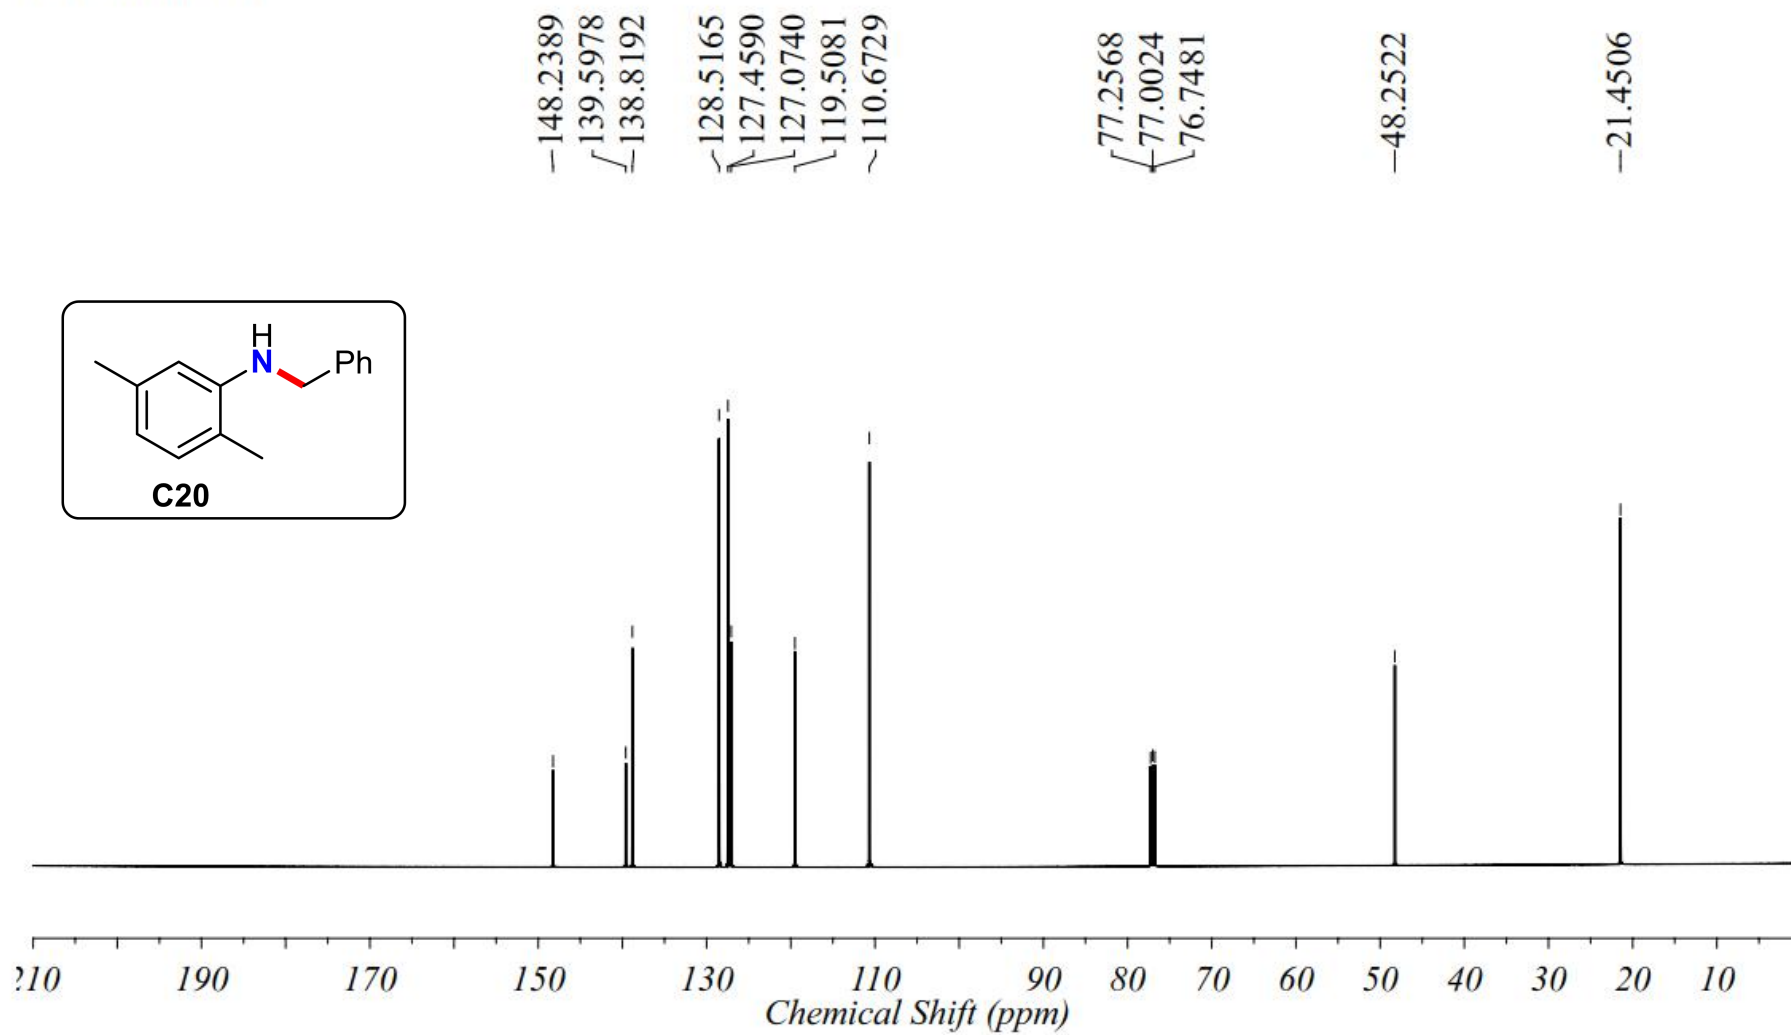

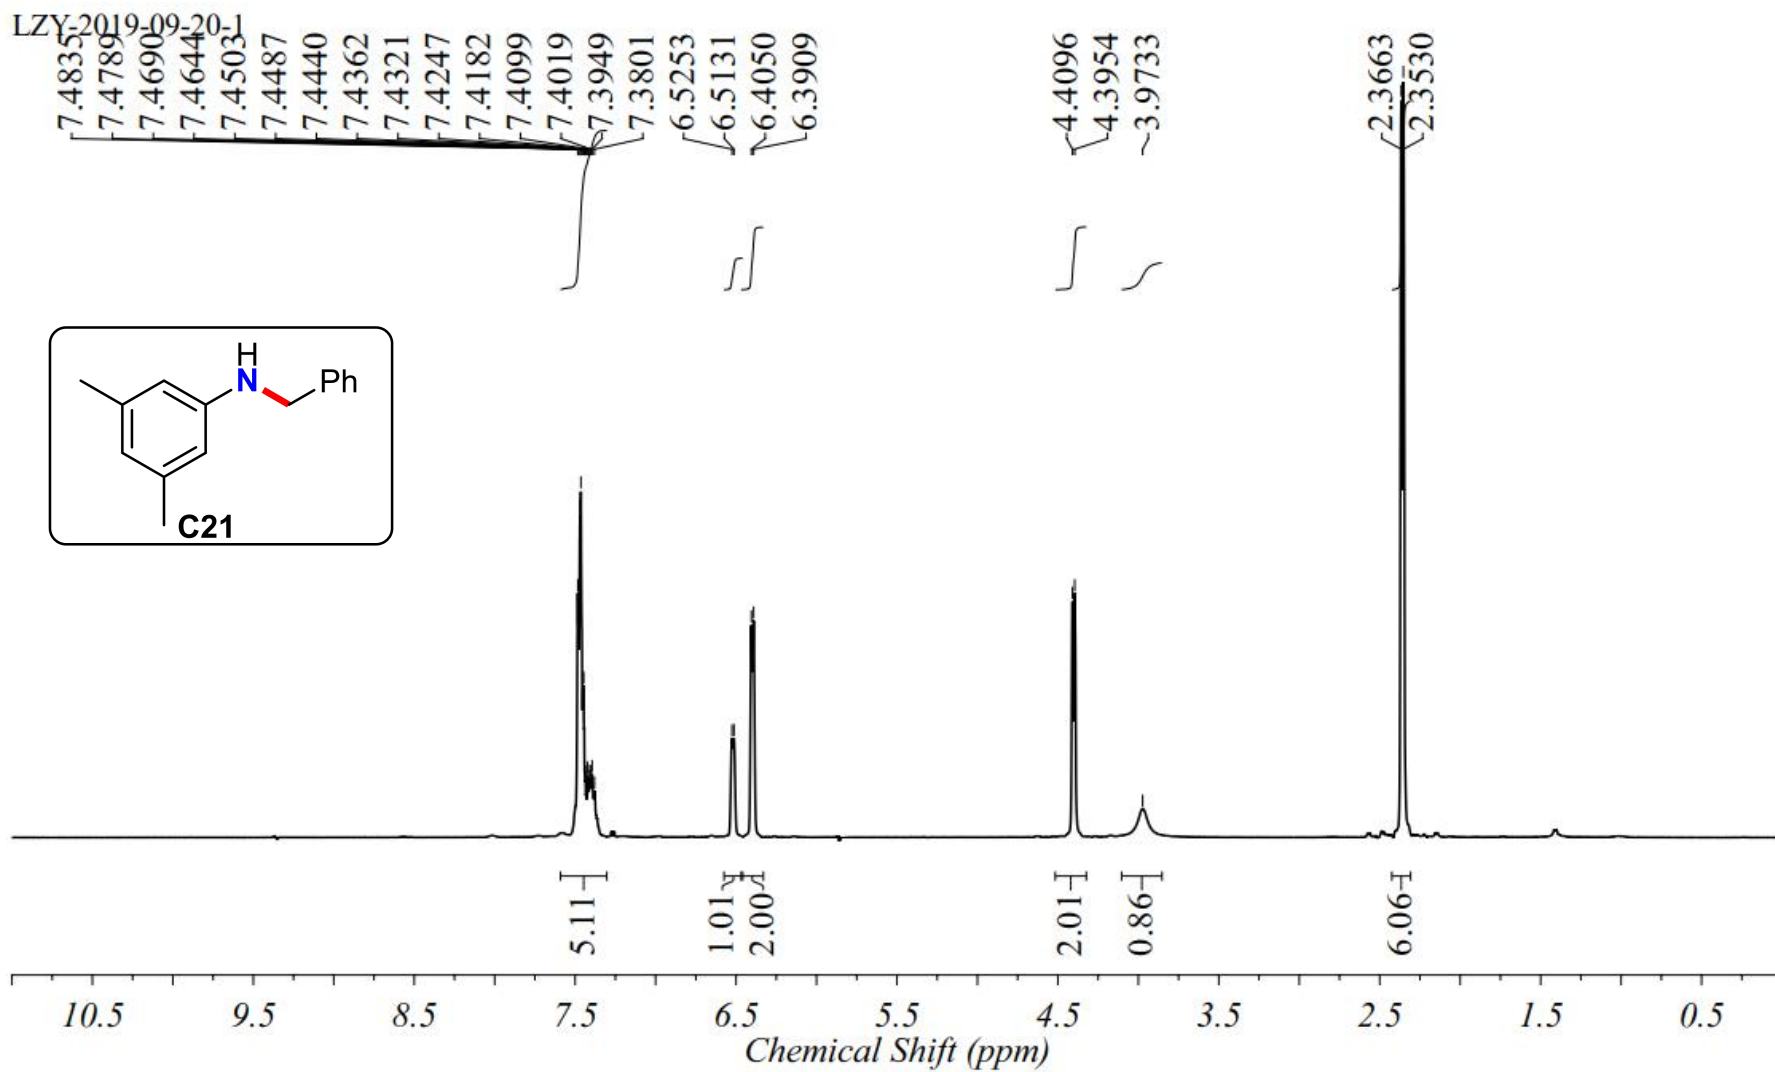

LZY-2019-09-22-1

-148.2319  
-139.5975  
-138.7994  
-128.5045  
-127.4497  
-127.0622  
-119.5092  
-110.6815

77.4233  
76.9995  
76.5752

-48.2577

-21.4441

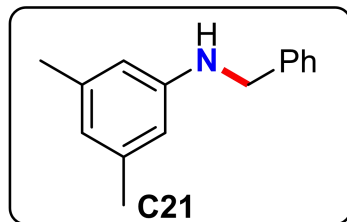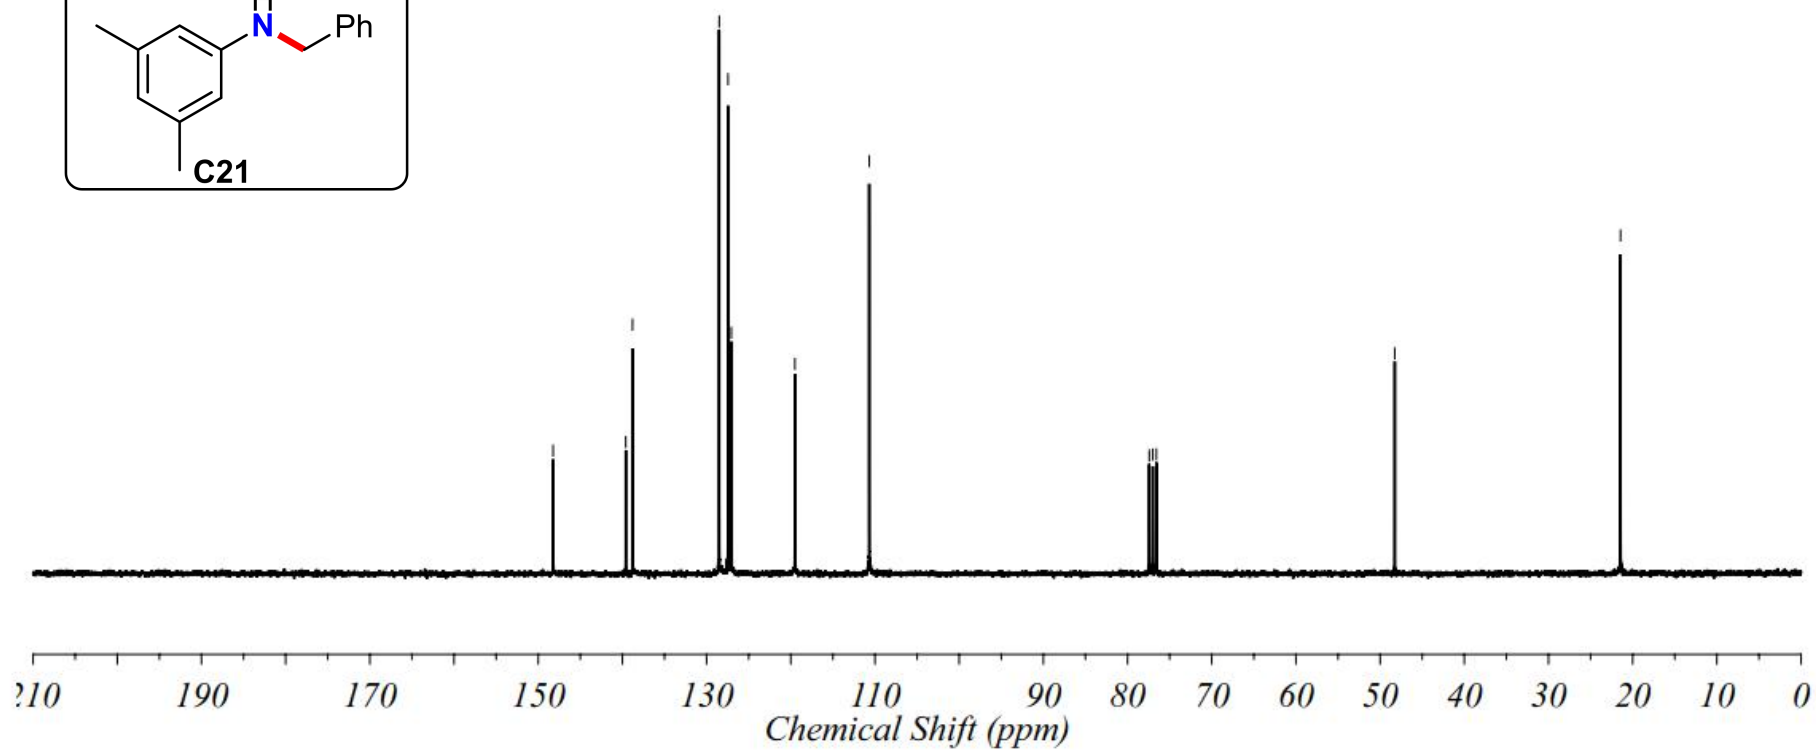

LZY-2019-09-22-2

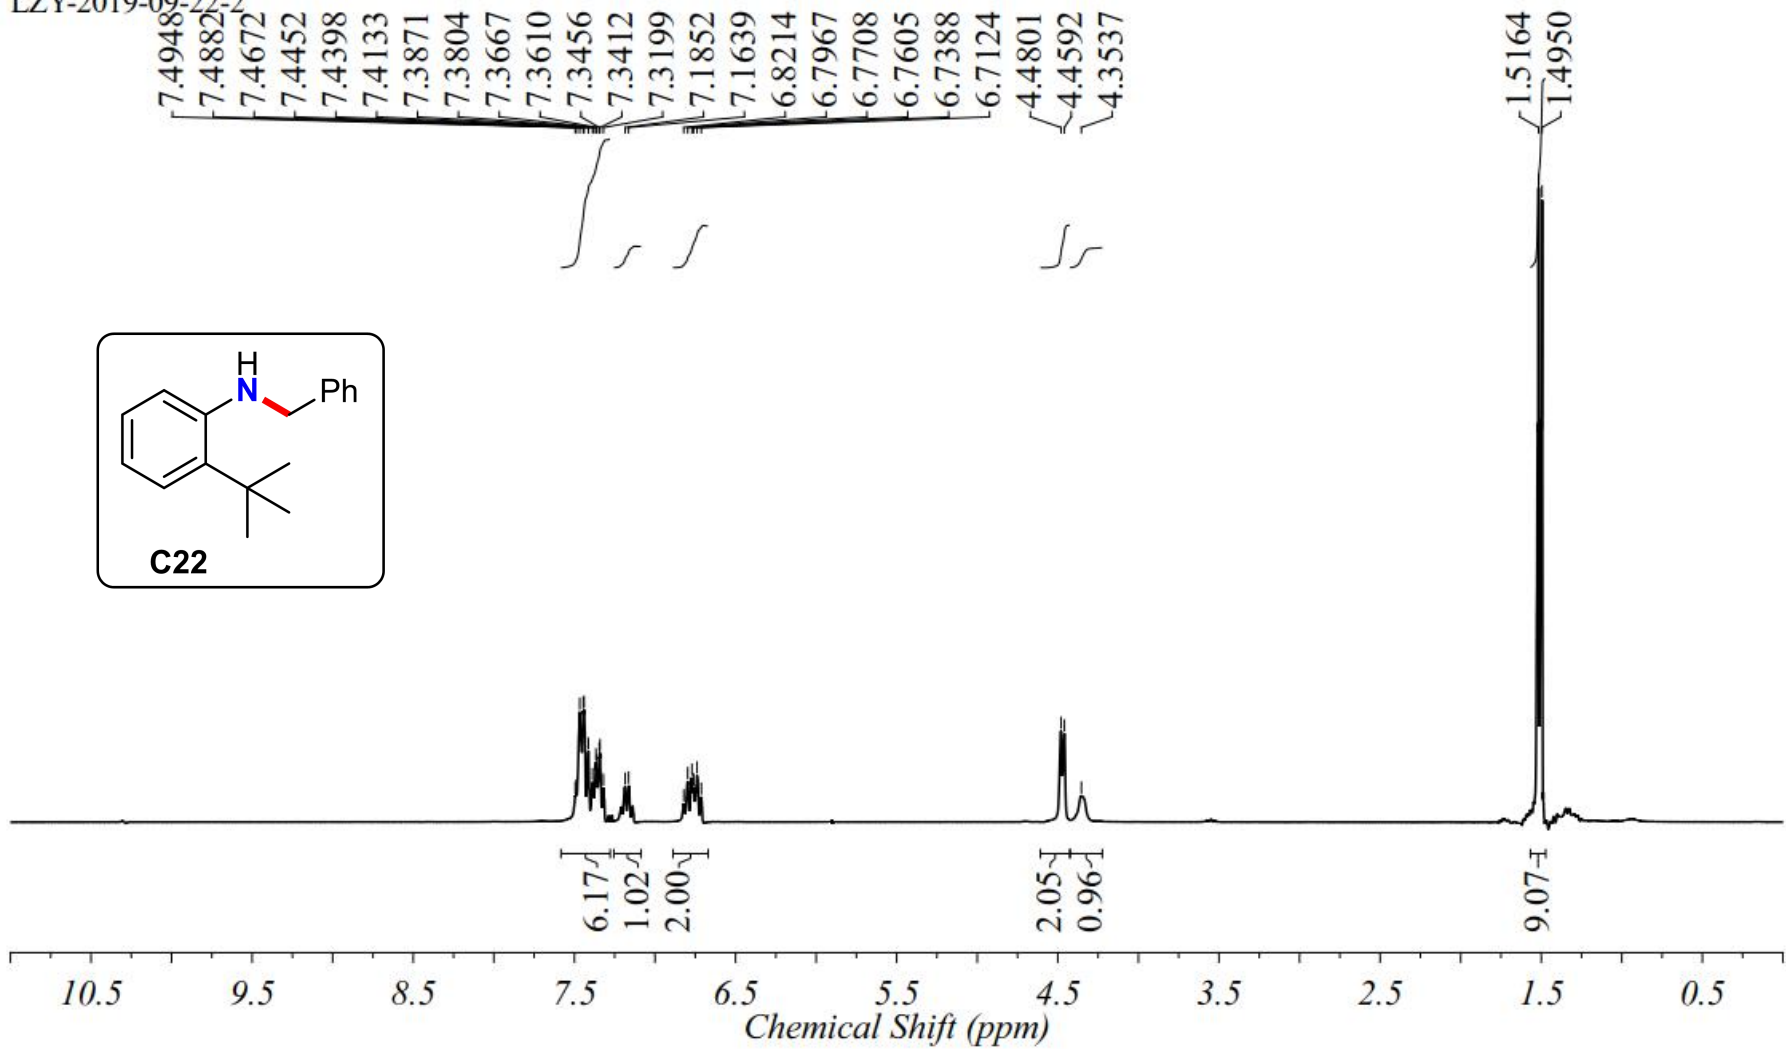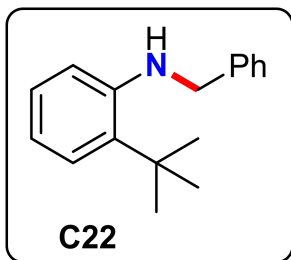

LZY-2019-09-22-2

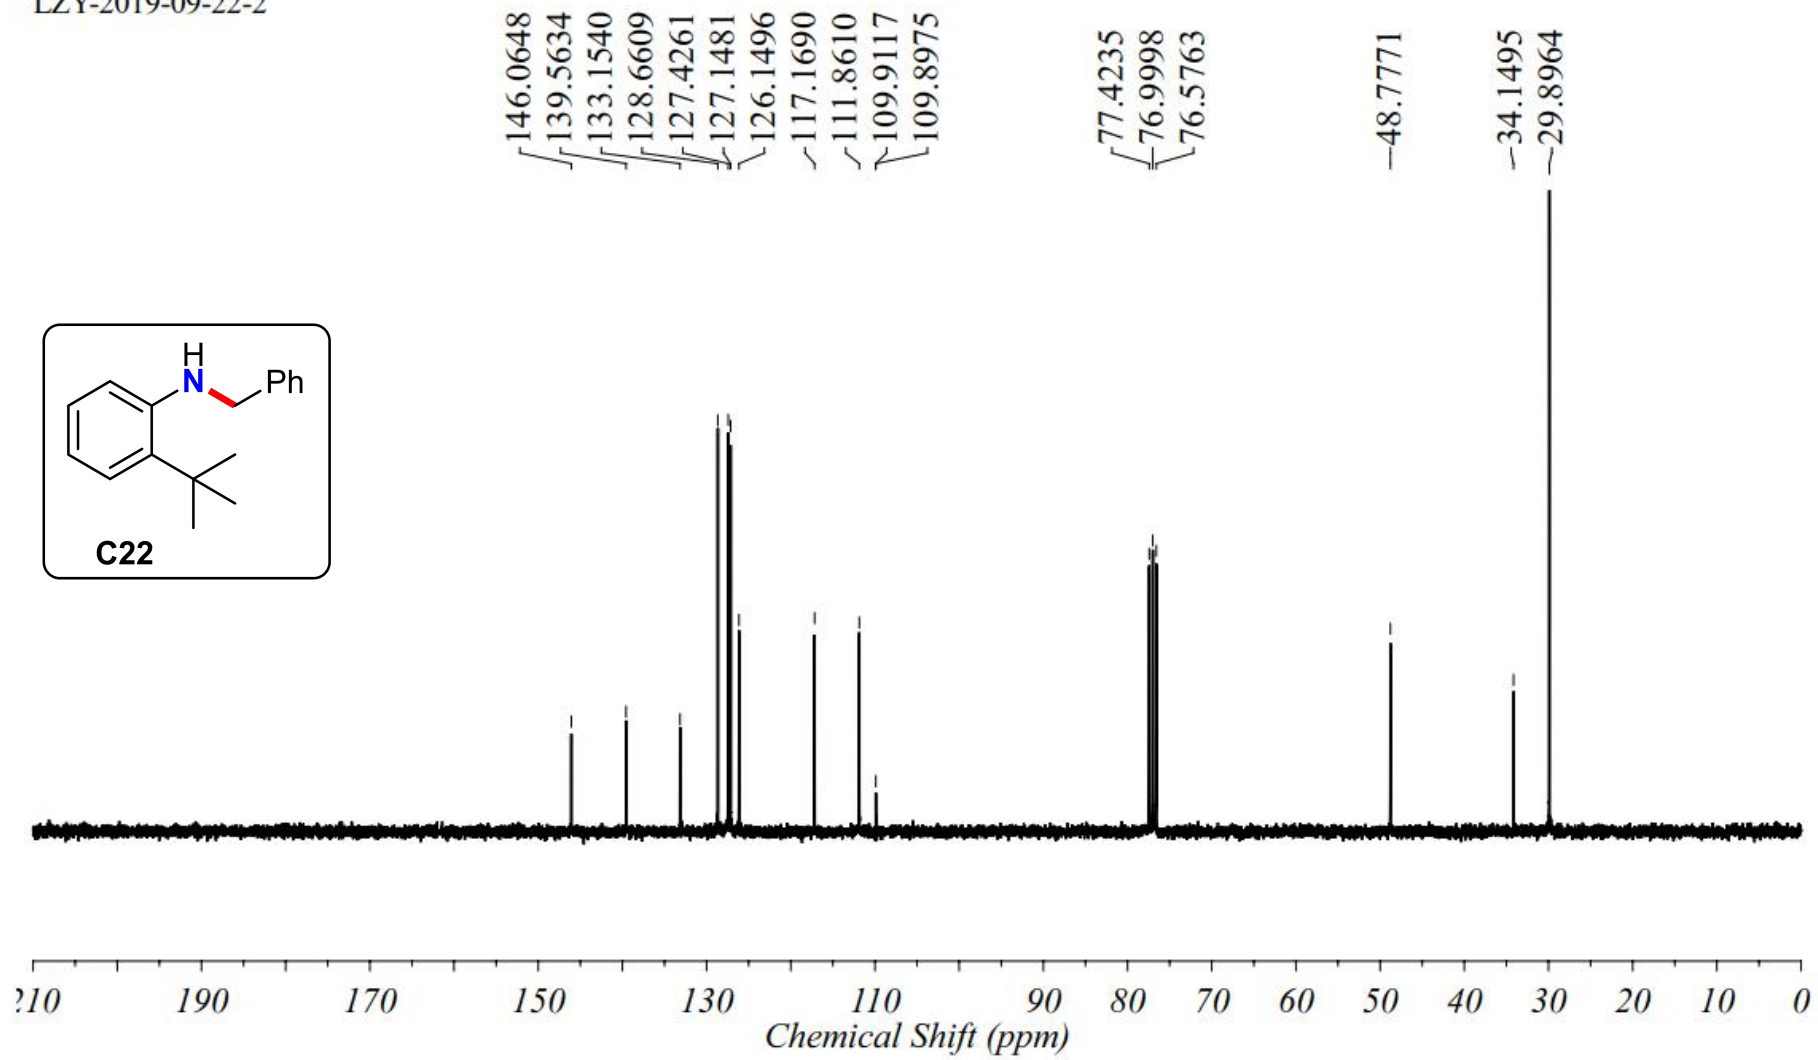

LZY-2019-09-20-1

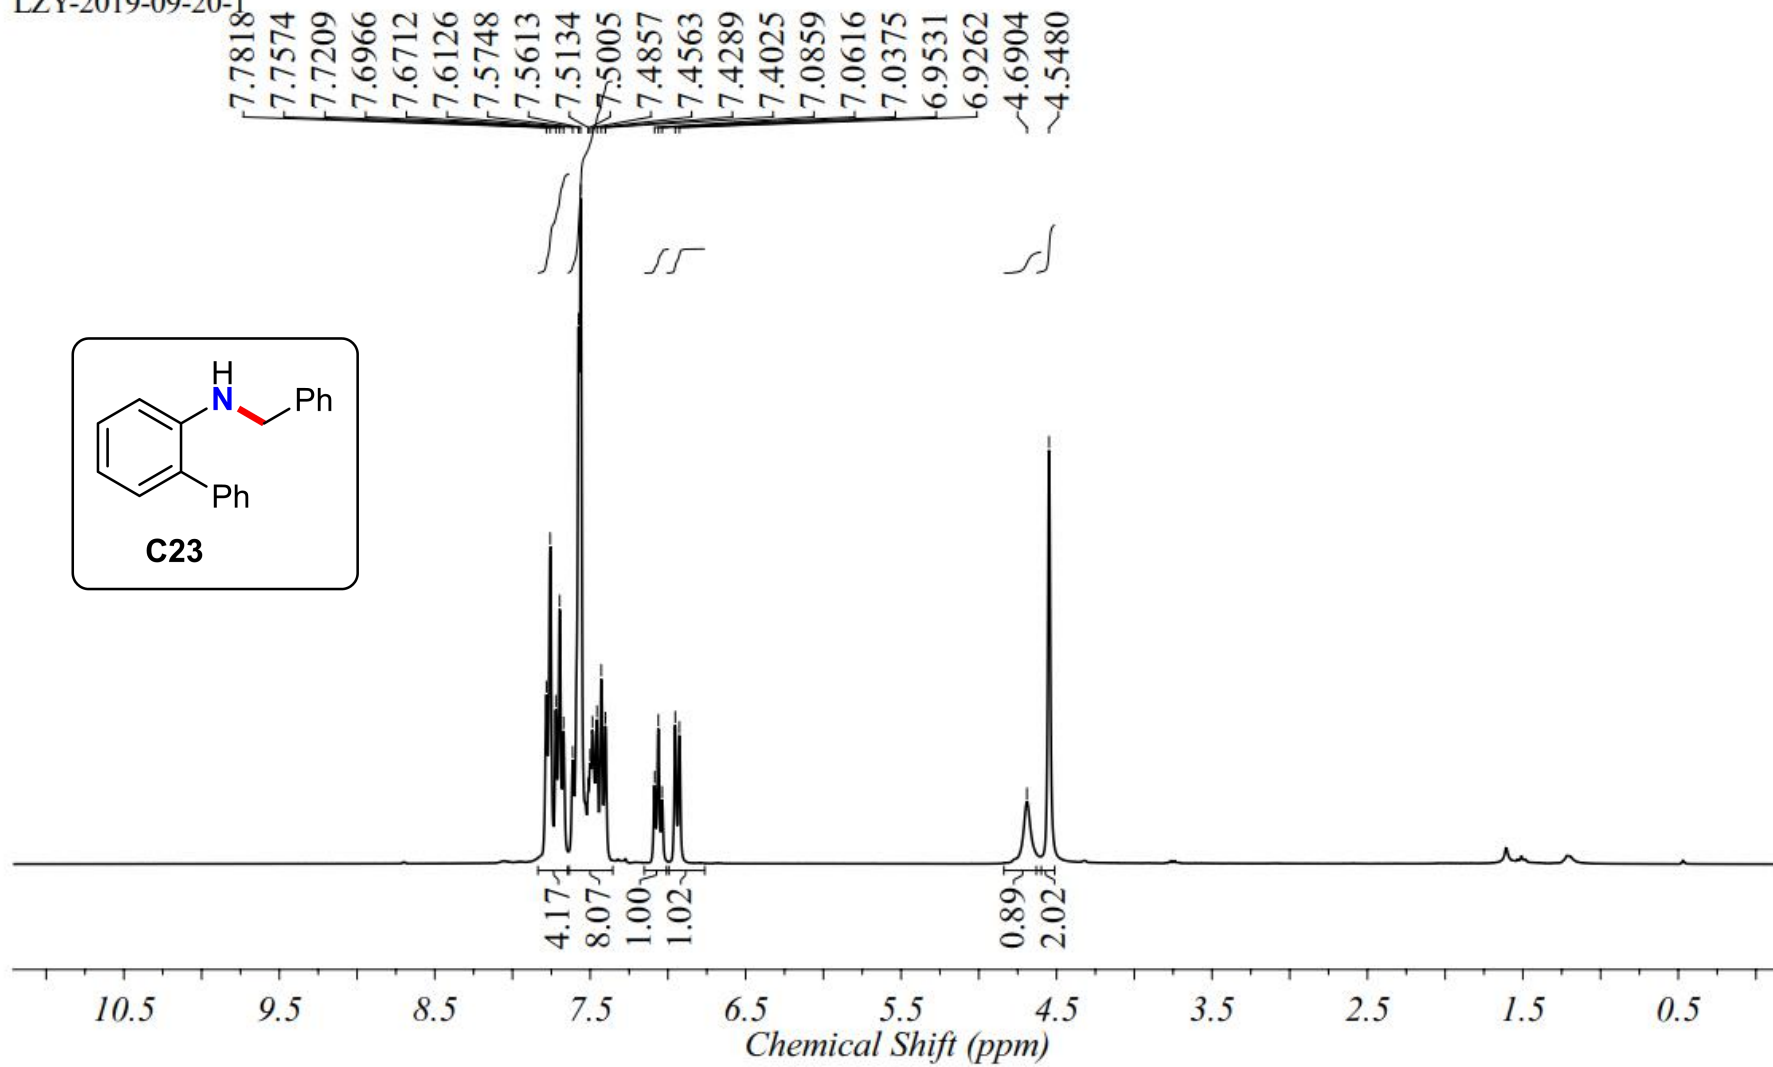

LZY-2019-10-01-1

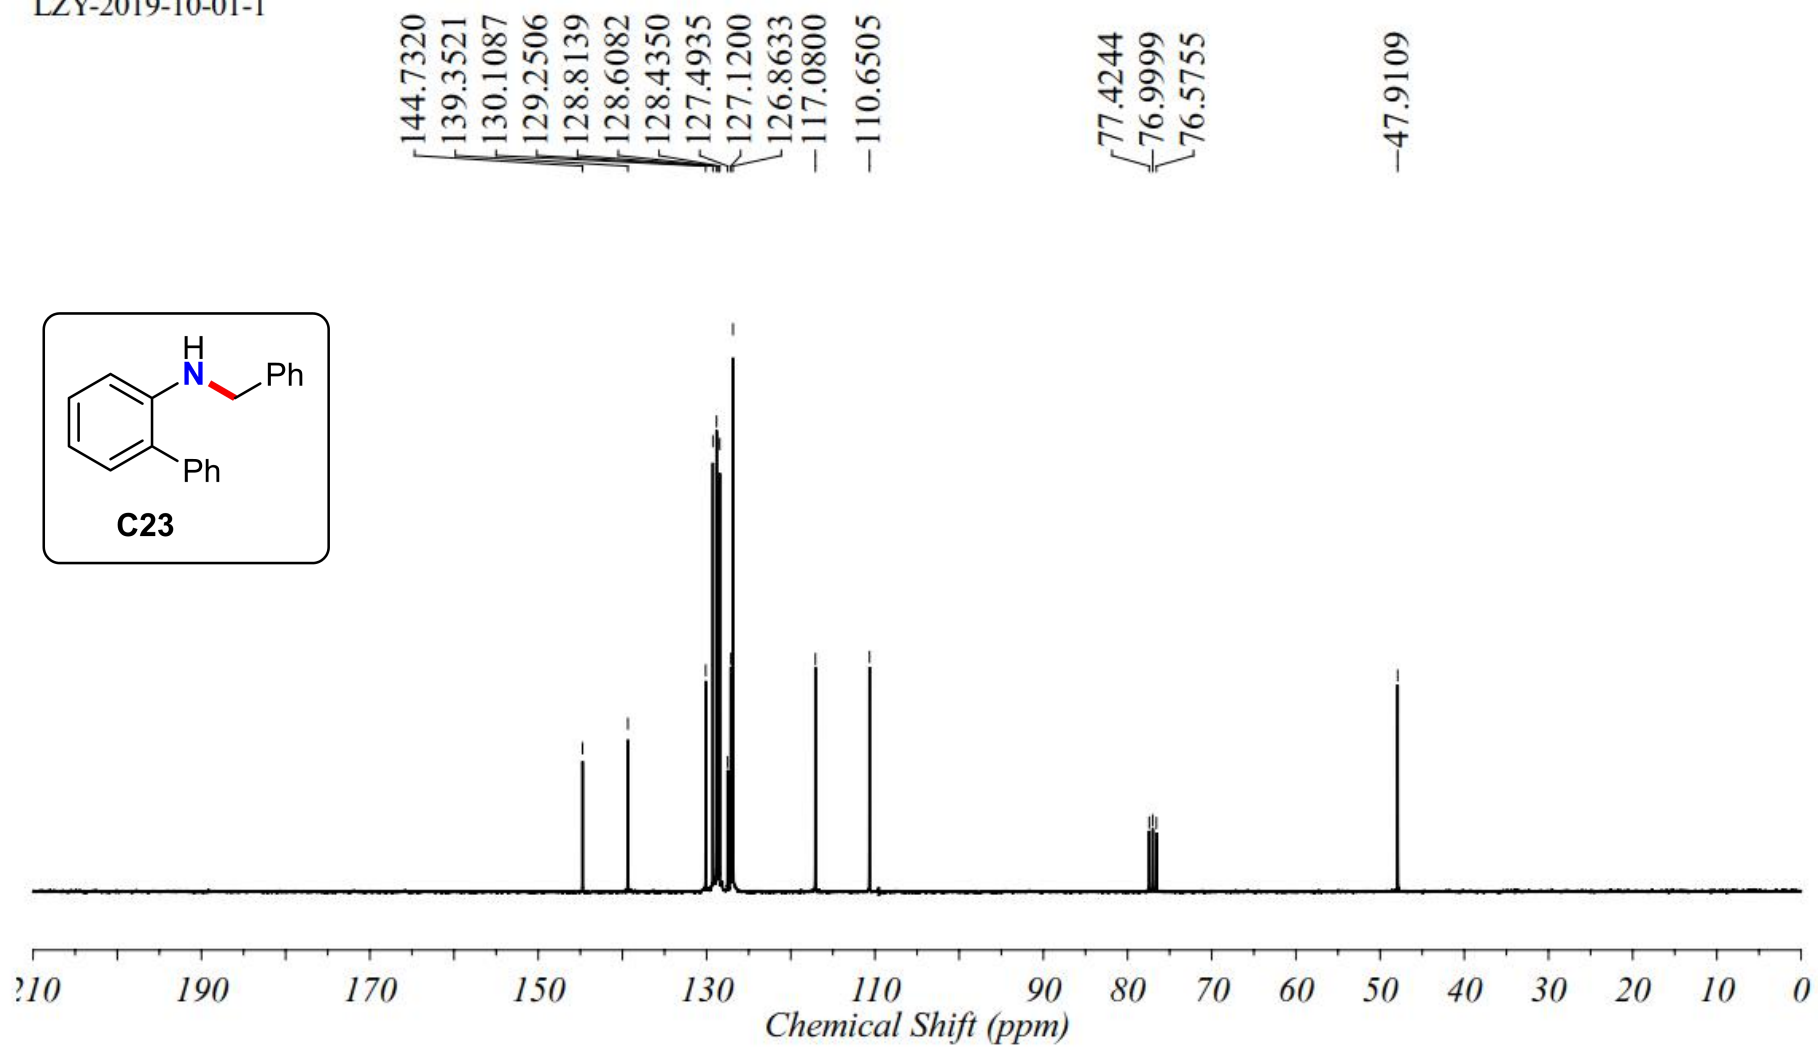



LZY-2019-10-01\_2

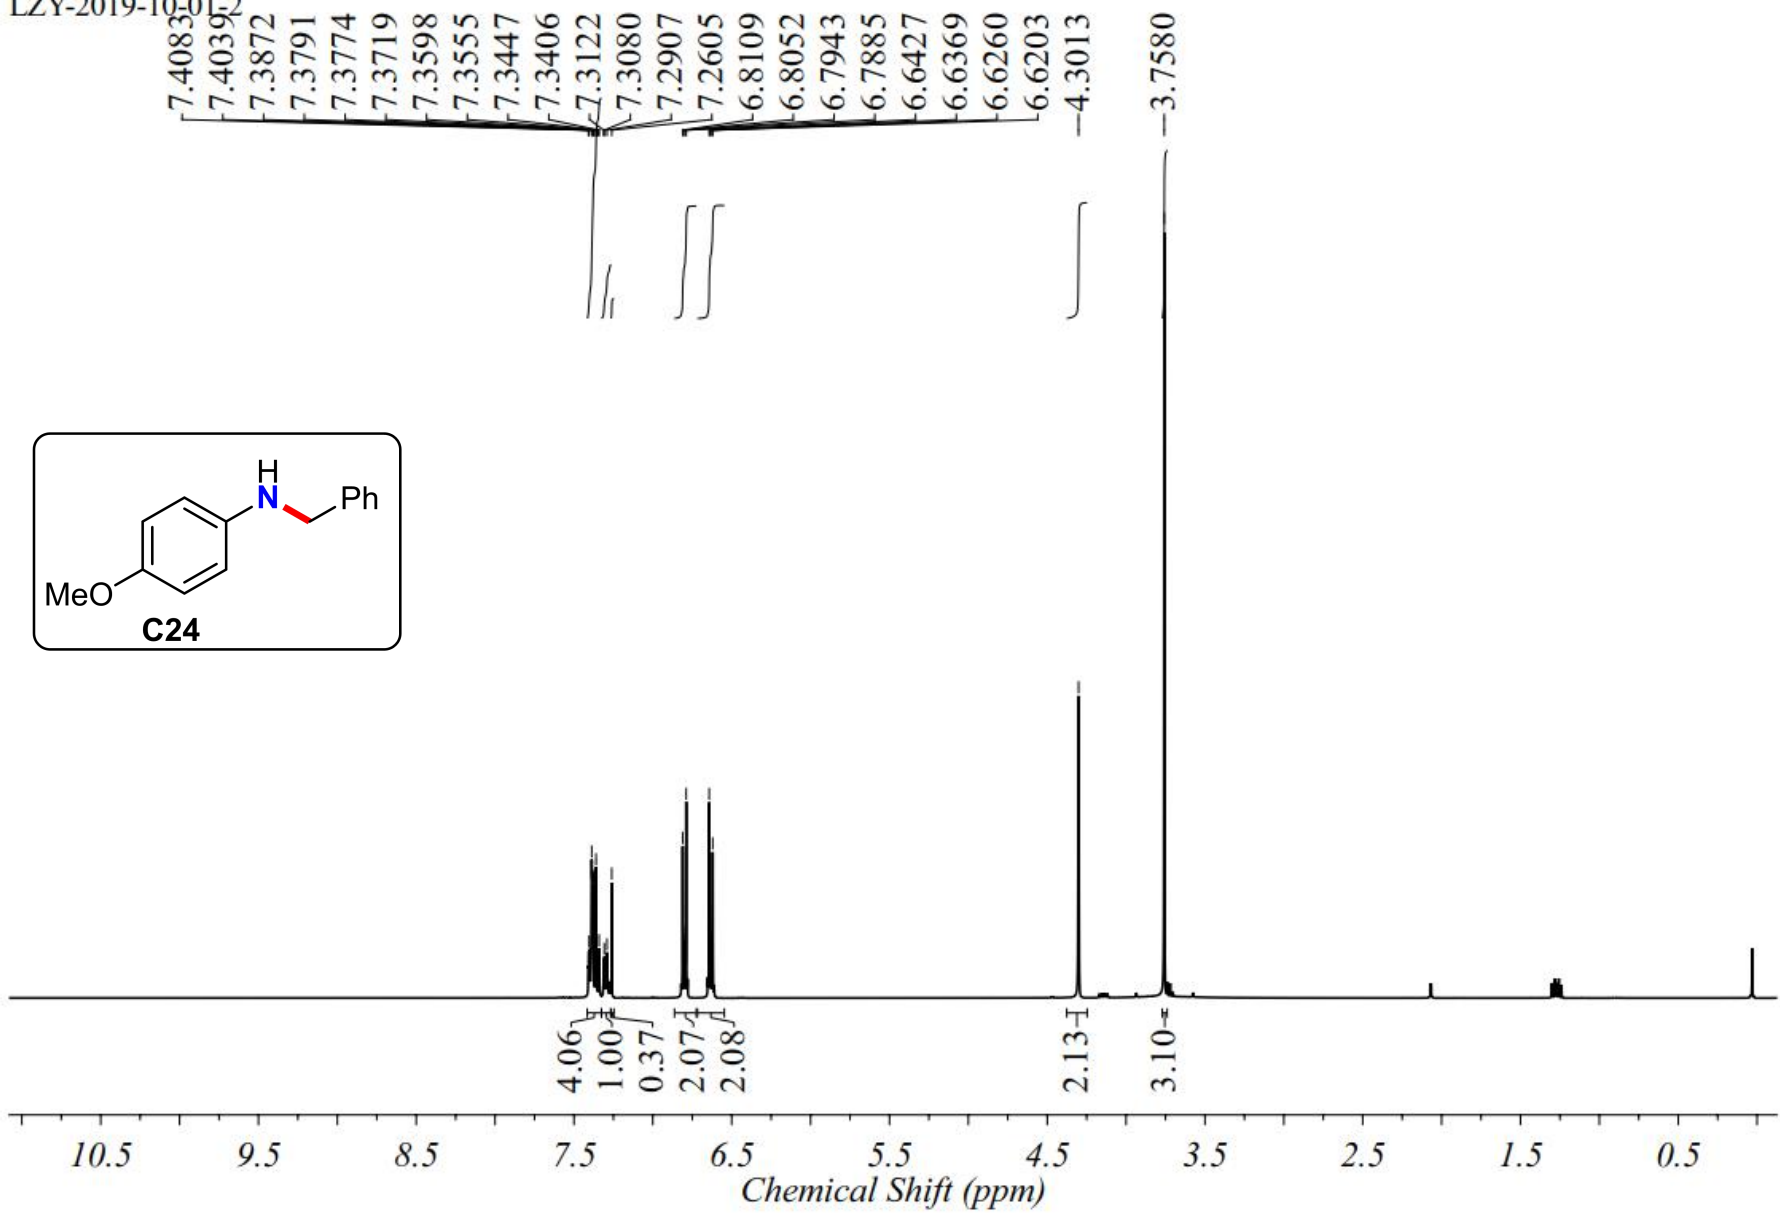

LZY-2019-10-01-2

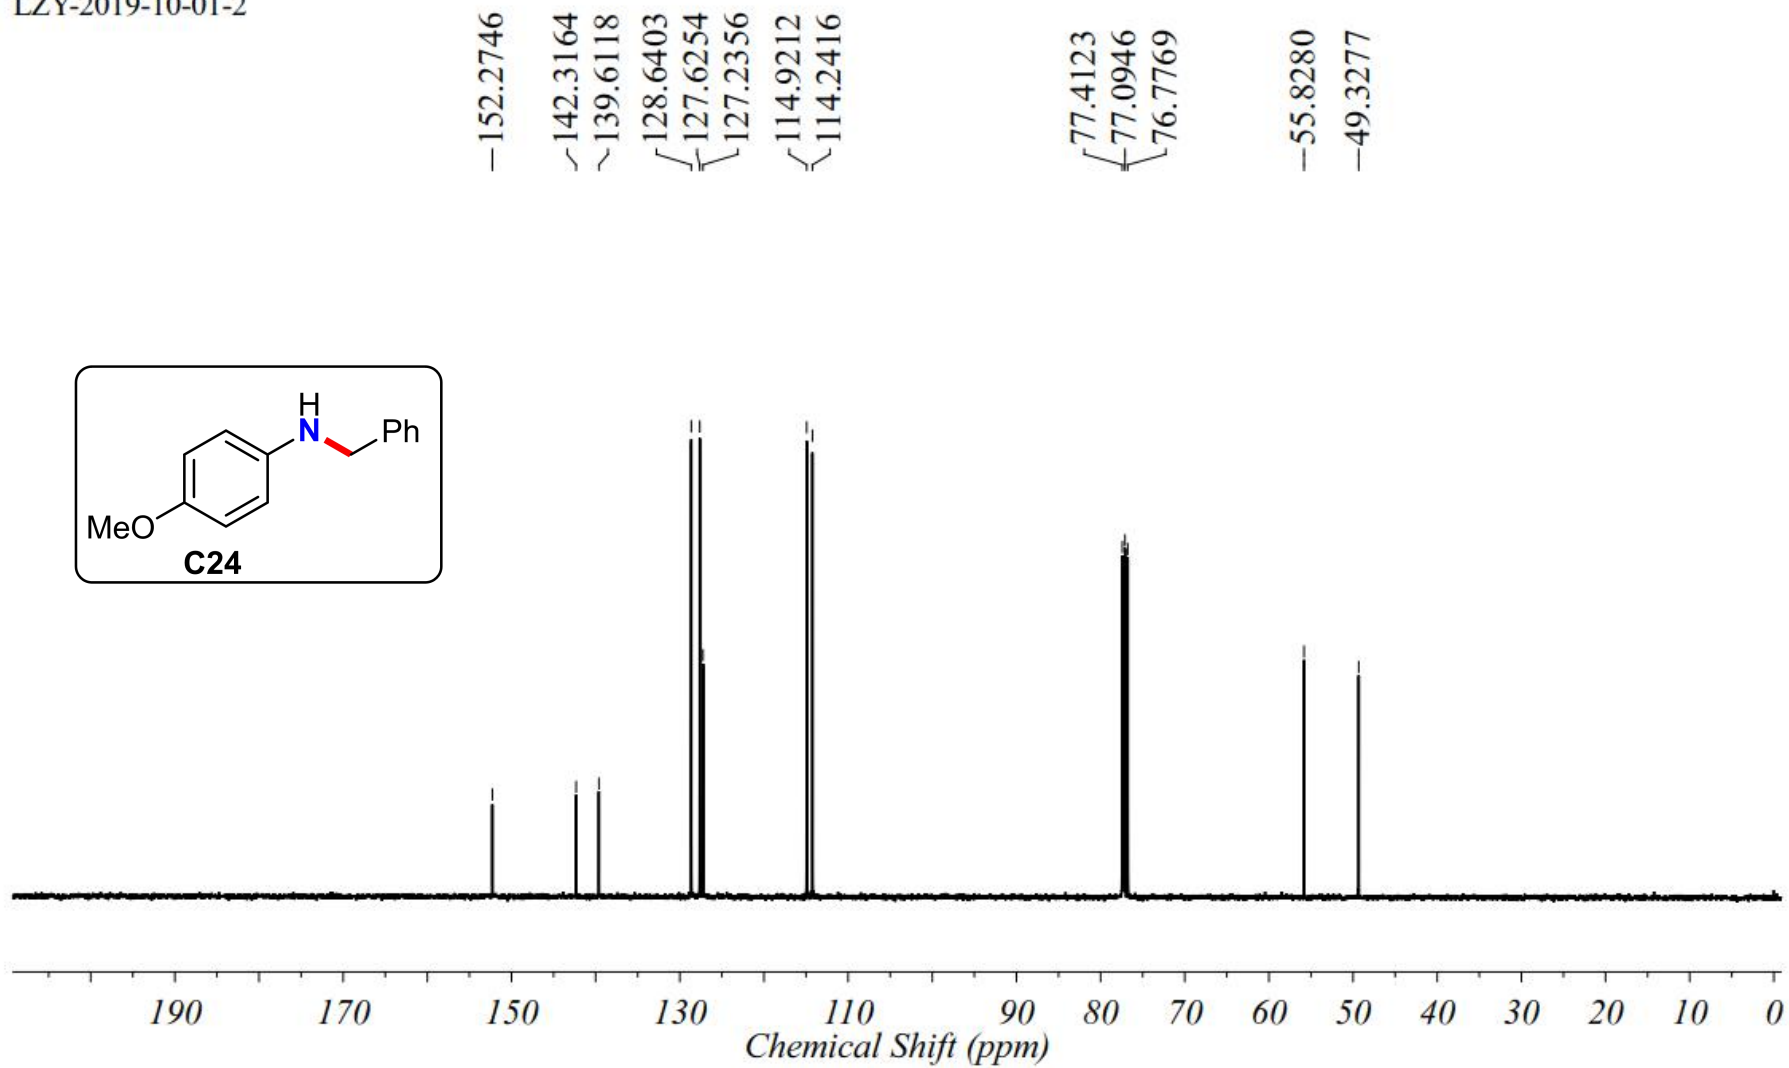

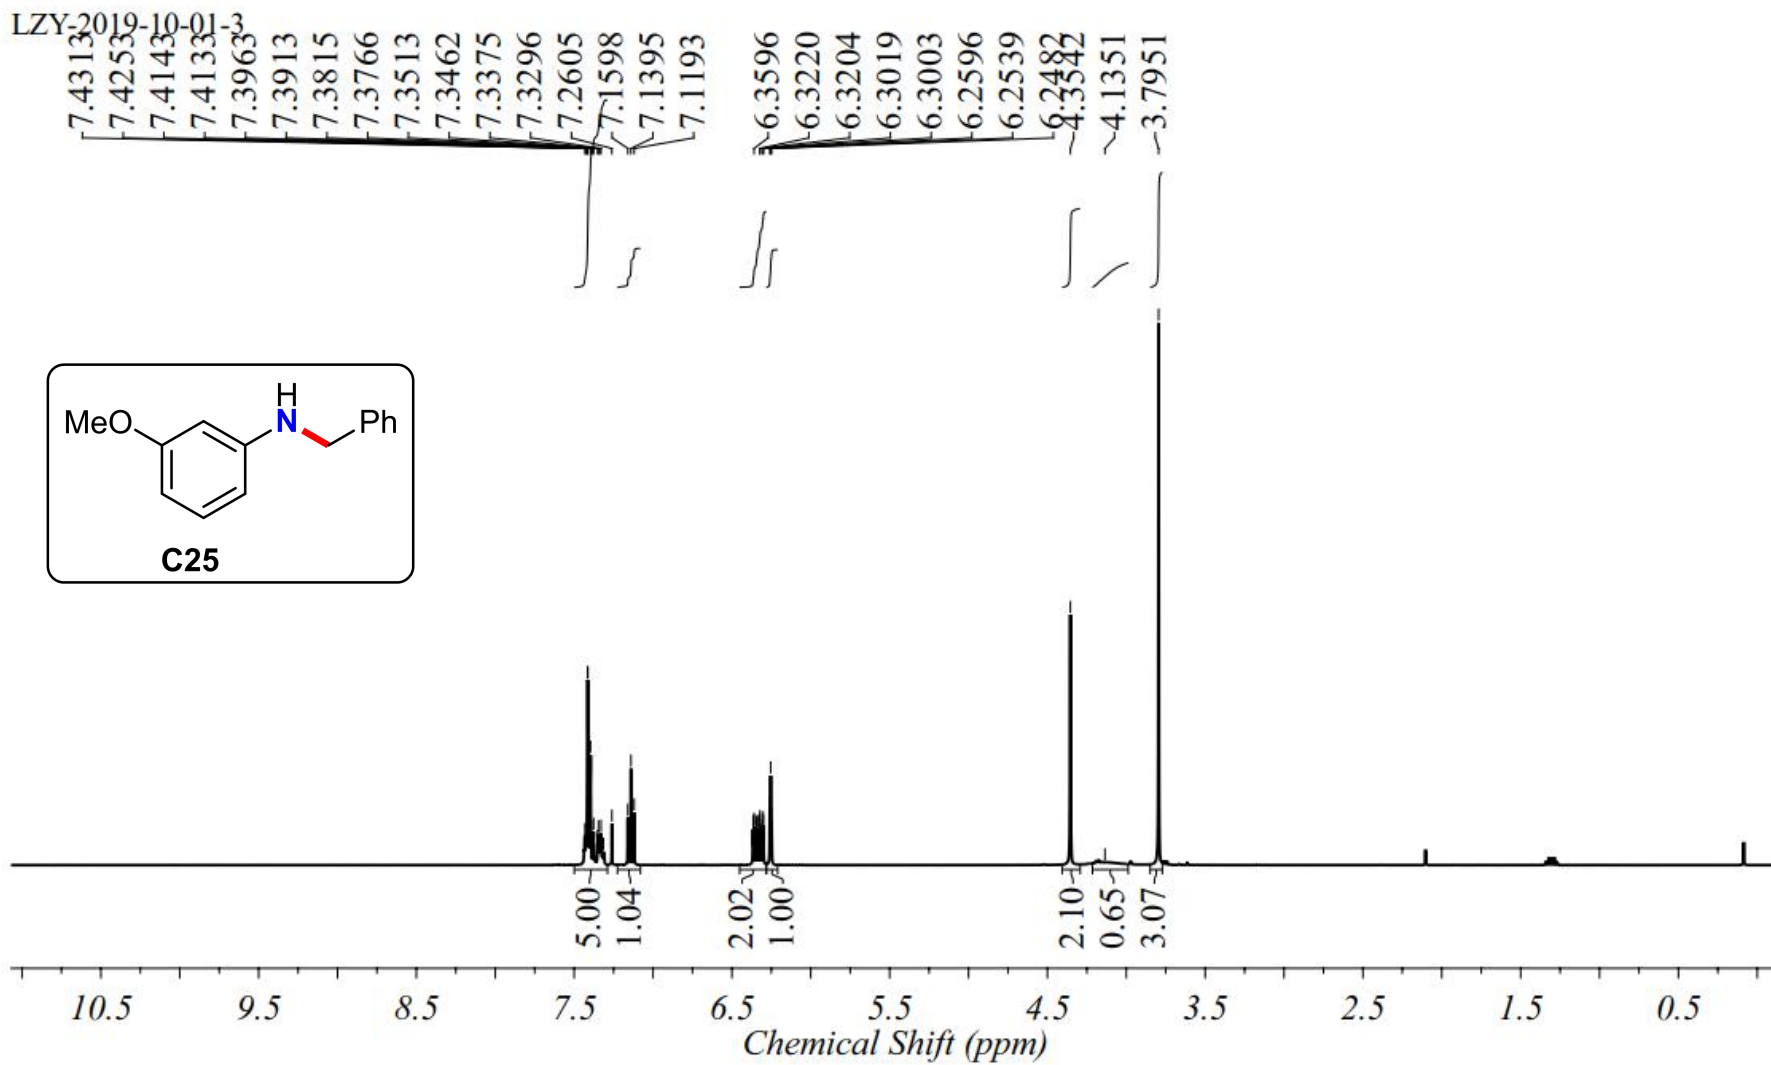

LZY-2019-10-01-3

-160.8951  
-149.5849  
139.3961  
130.0944  
128.7230  
127.6154  
127.3332  
  
106.0959  
102.7730  
98.9741  
  
77.5047  
77.1868  
76.8688  
  
55.1297  
48.3832

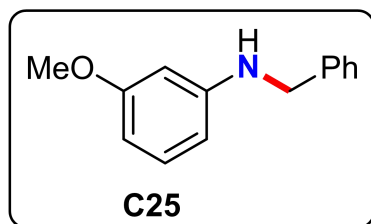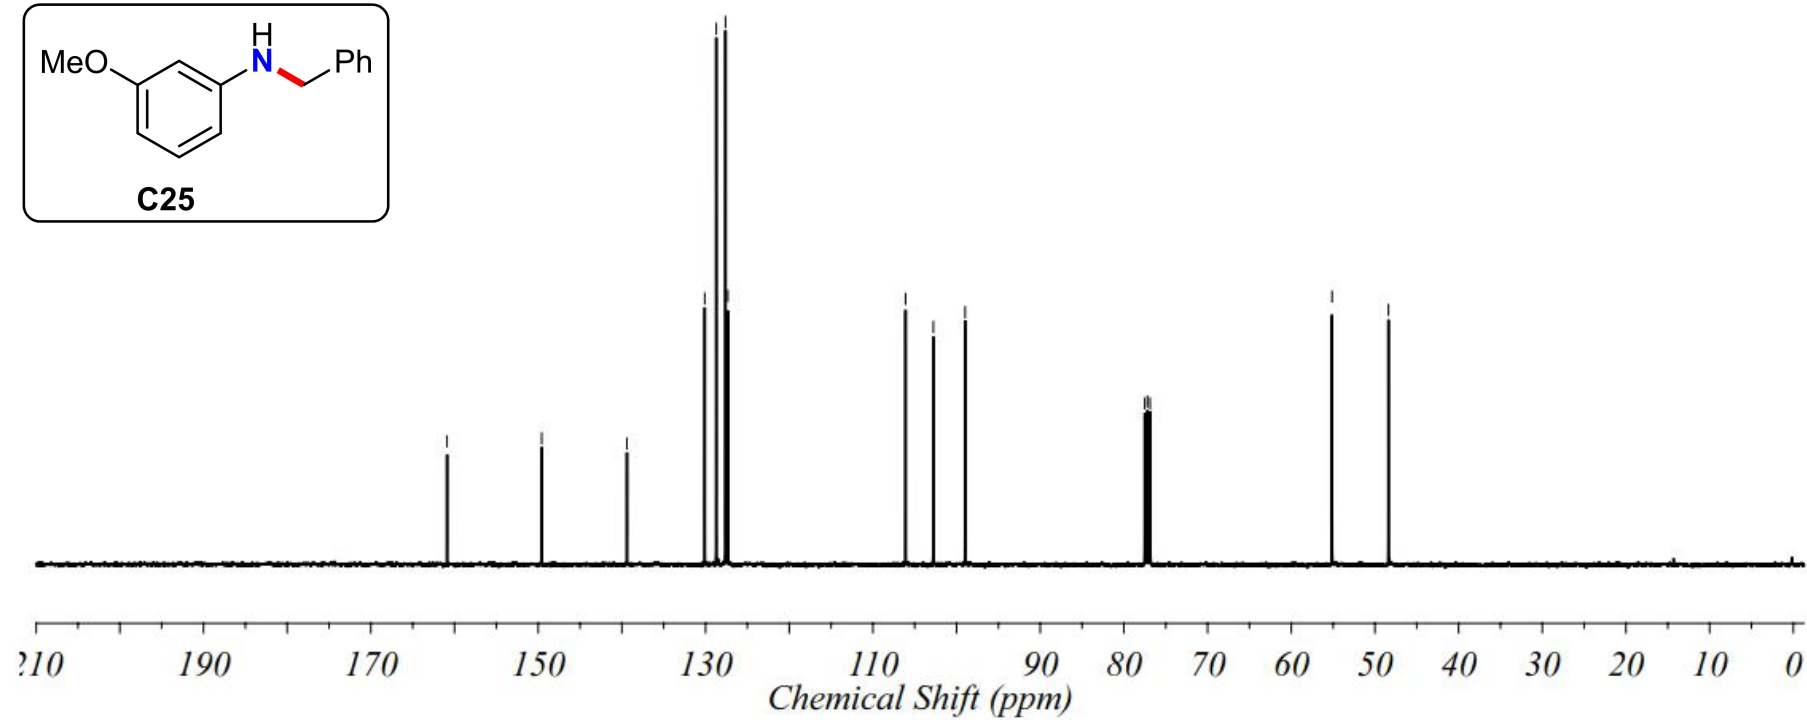

LZY-2019-10-01-4

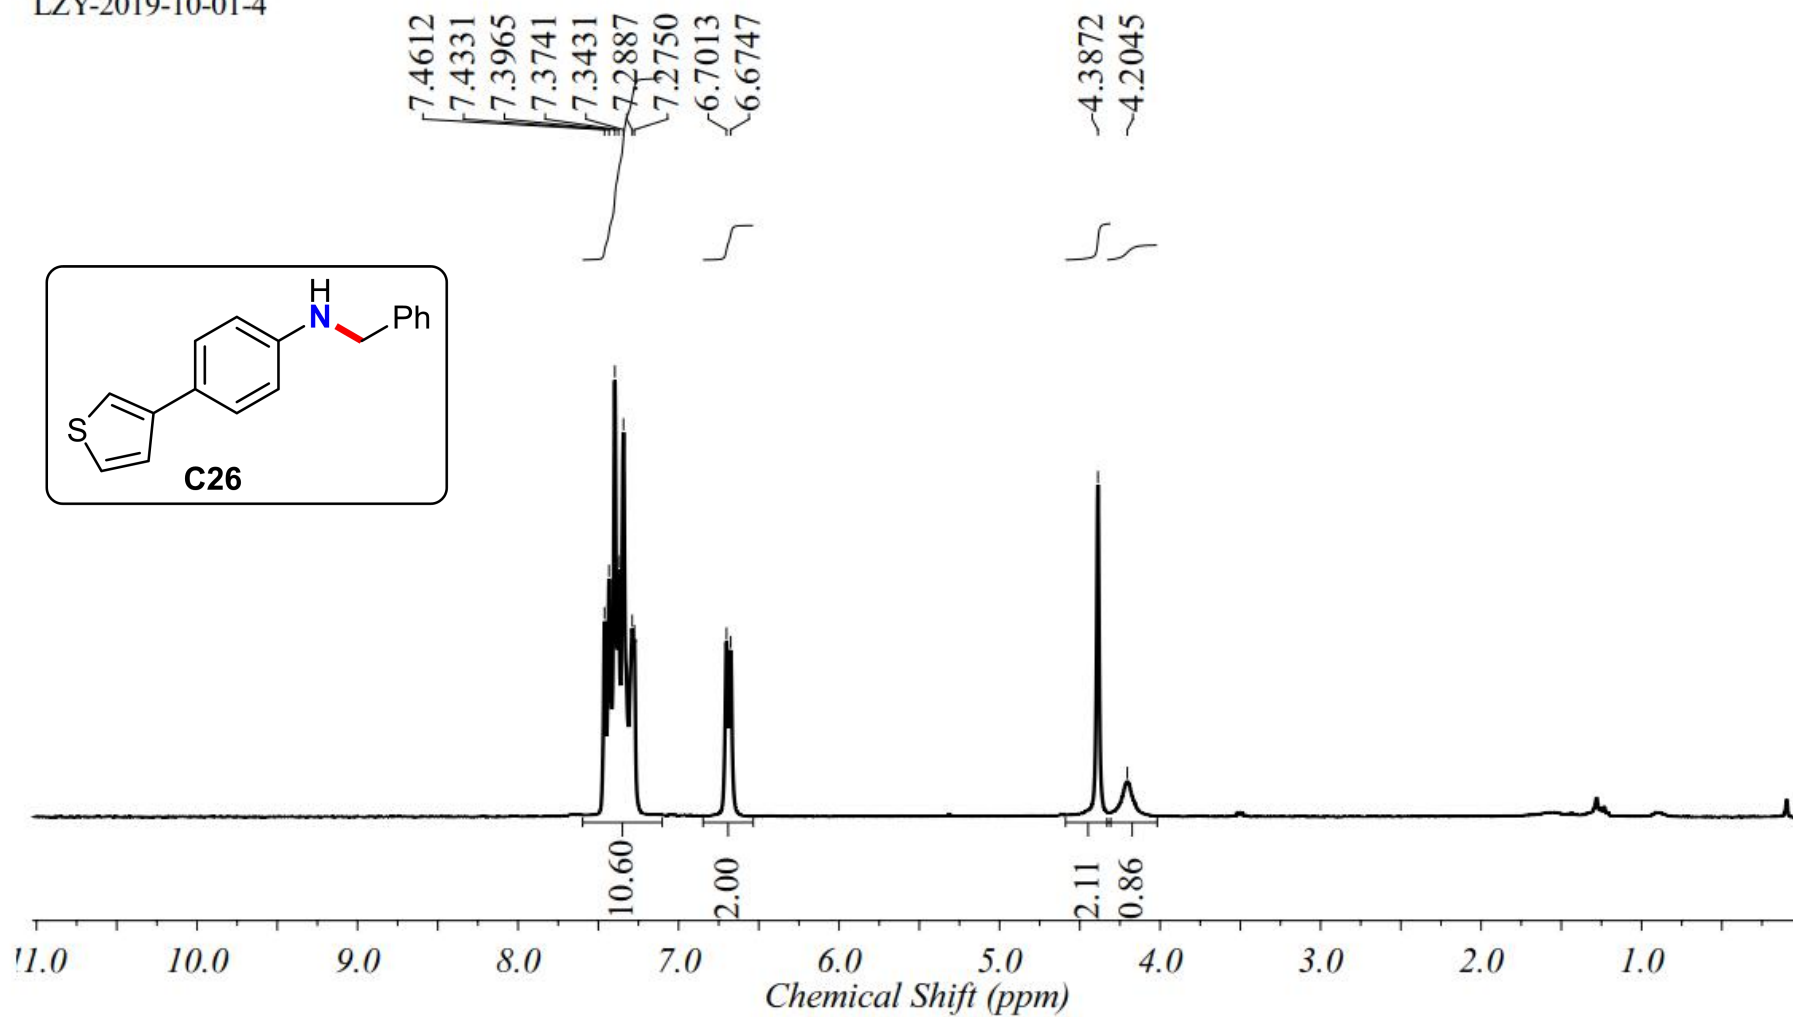

LZY-2019-10-01-4

147.2773  
147.2773  
142.4658  
142.4658  
139.2334  
139.2334  
128.6312  
128.6312  
127.4341  
127.4341  
127.3793  
127.3793  
112.9976  
112.9976  
77.4239  
77.4239  
77.0004  
77.0004  
76.5764  
76.5764  
48.2532  
48.2532

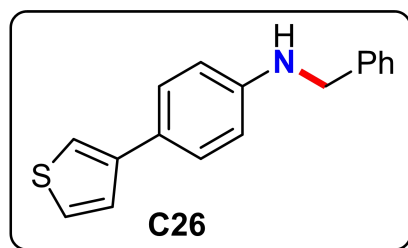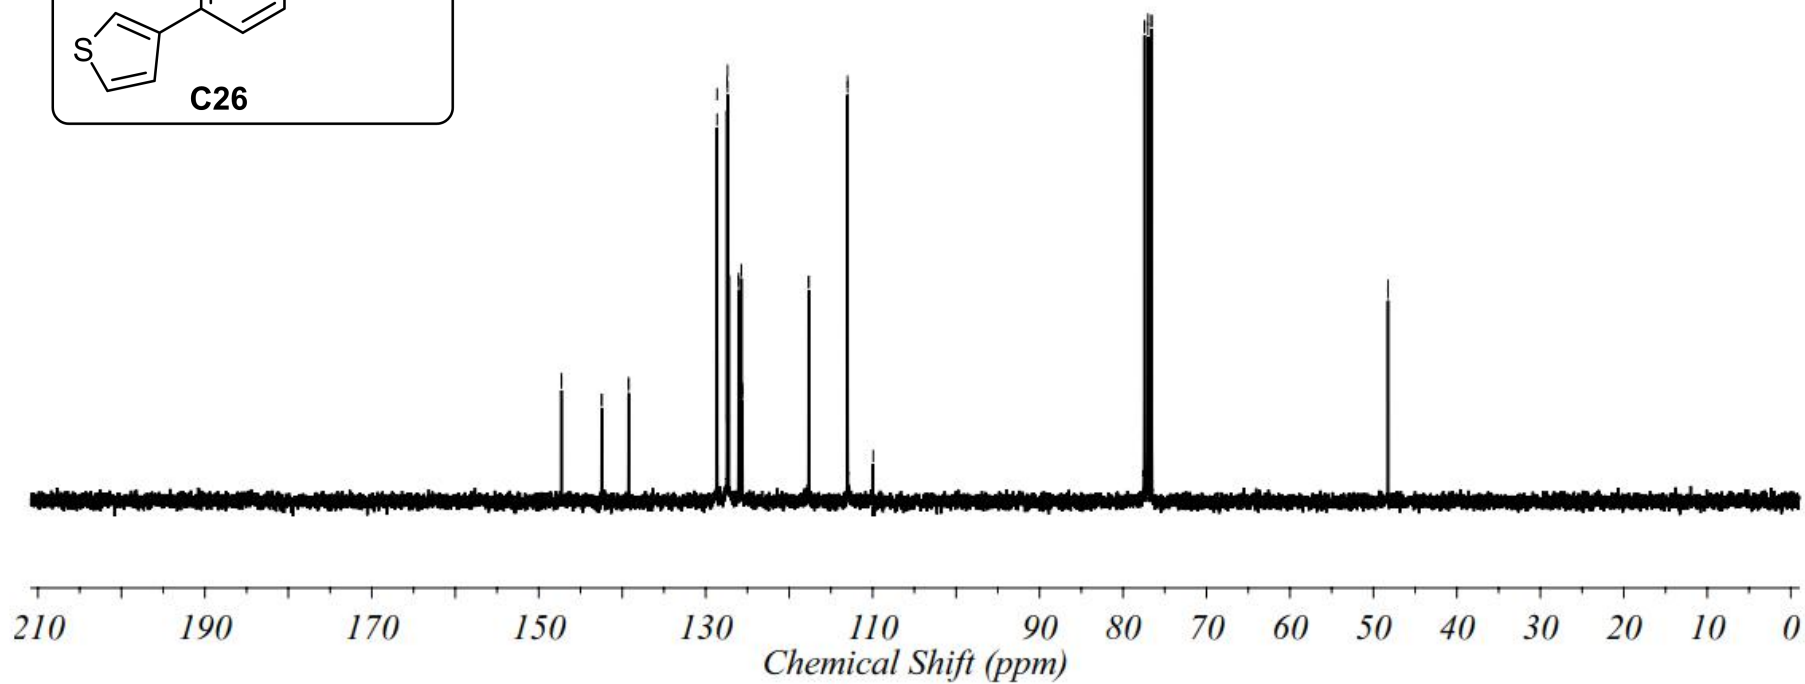

LZY-2019-10-05-1

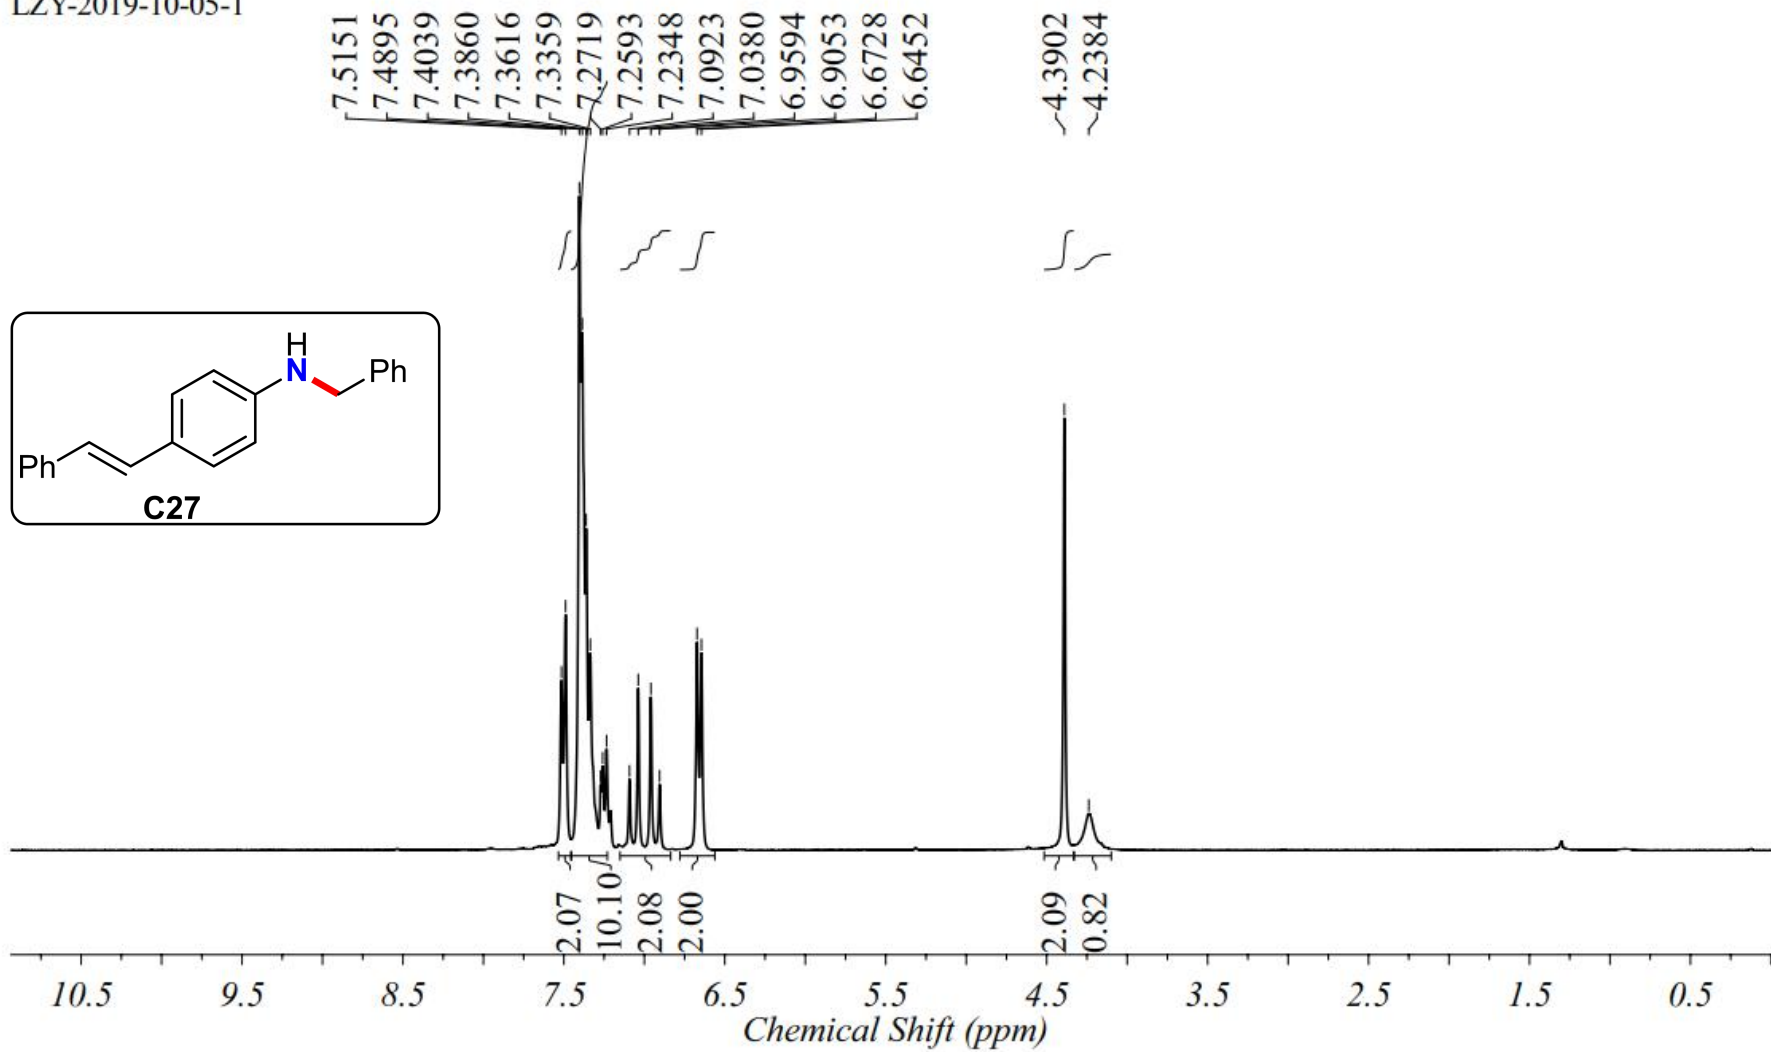

LZY-2019-10-05-1

147.7103  
139.0889  
138.0336  
128.7400  
128.6447  
128.5469  
127.7352  
127.4385  
127.2861  
127.0022  
126.7235  
126.0067  
124.5692  
112.9181  
109.9264  
  
77.4240  
77.0000  
76.5764  
  
-48.1716

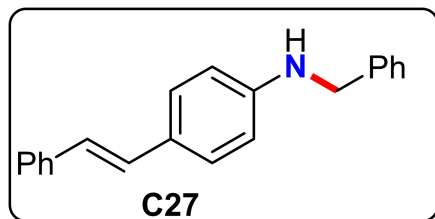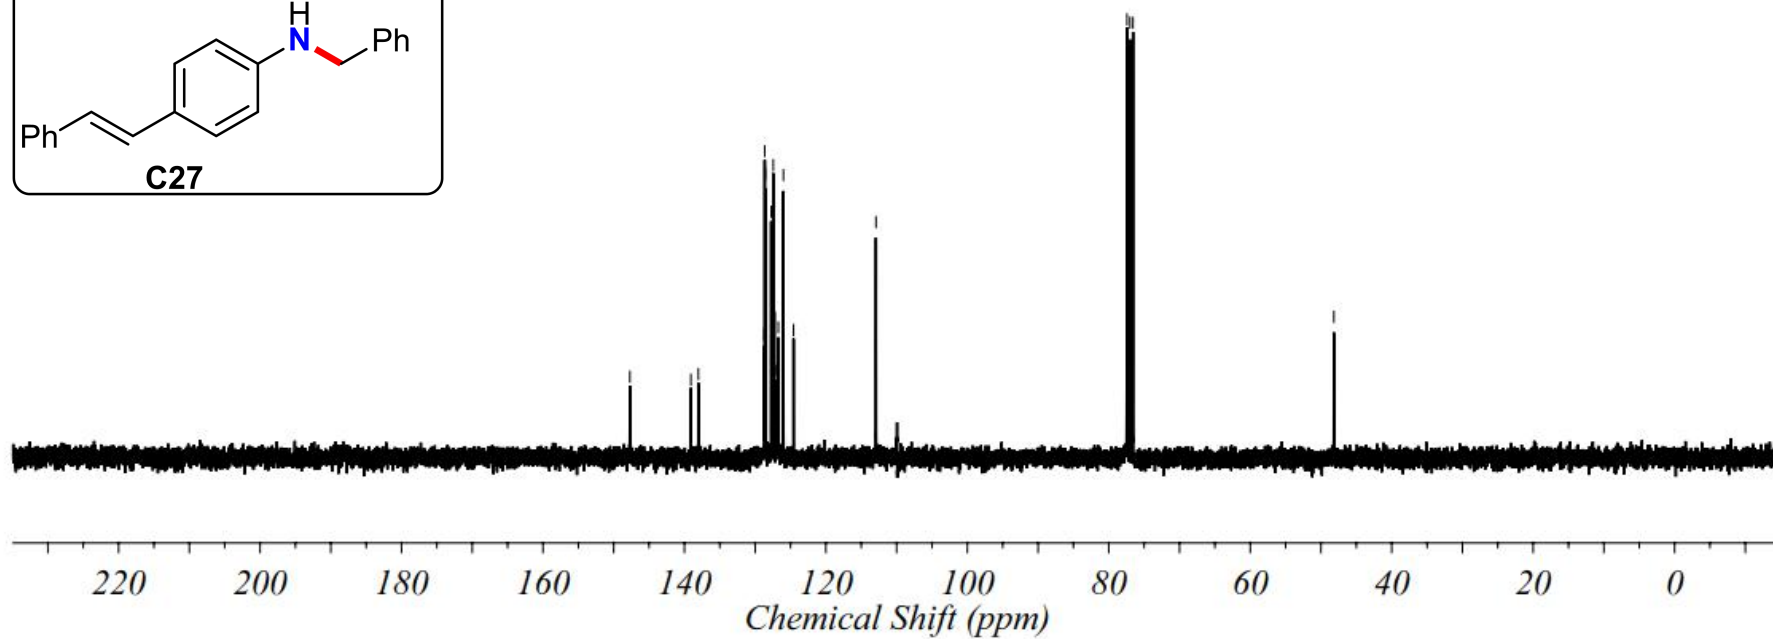



LZY-2019-10-05-3

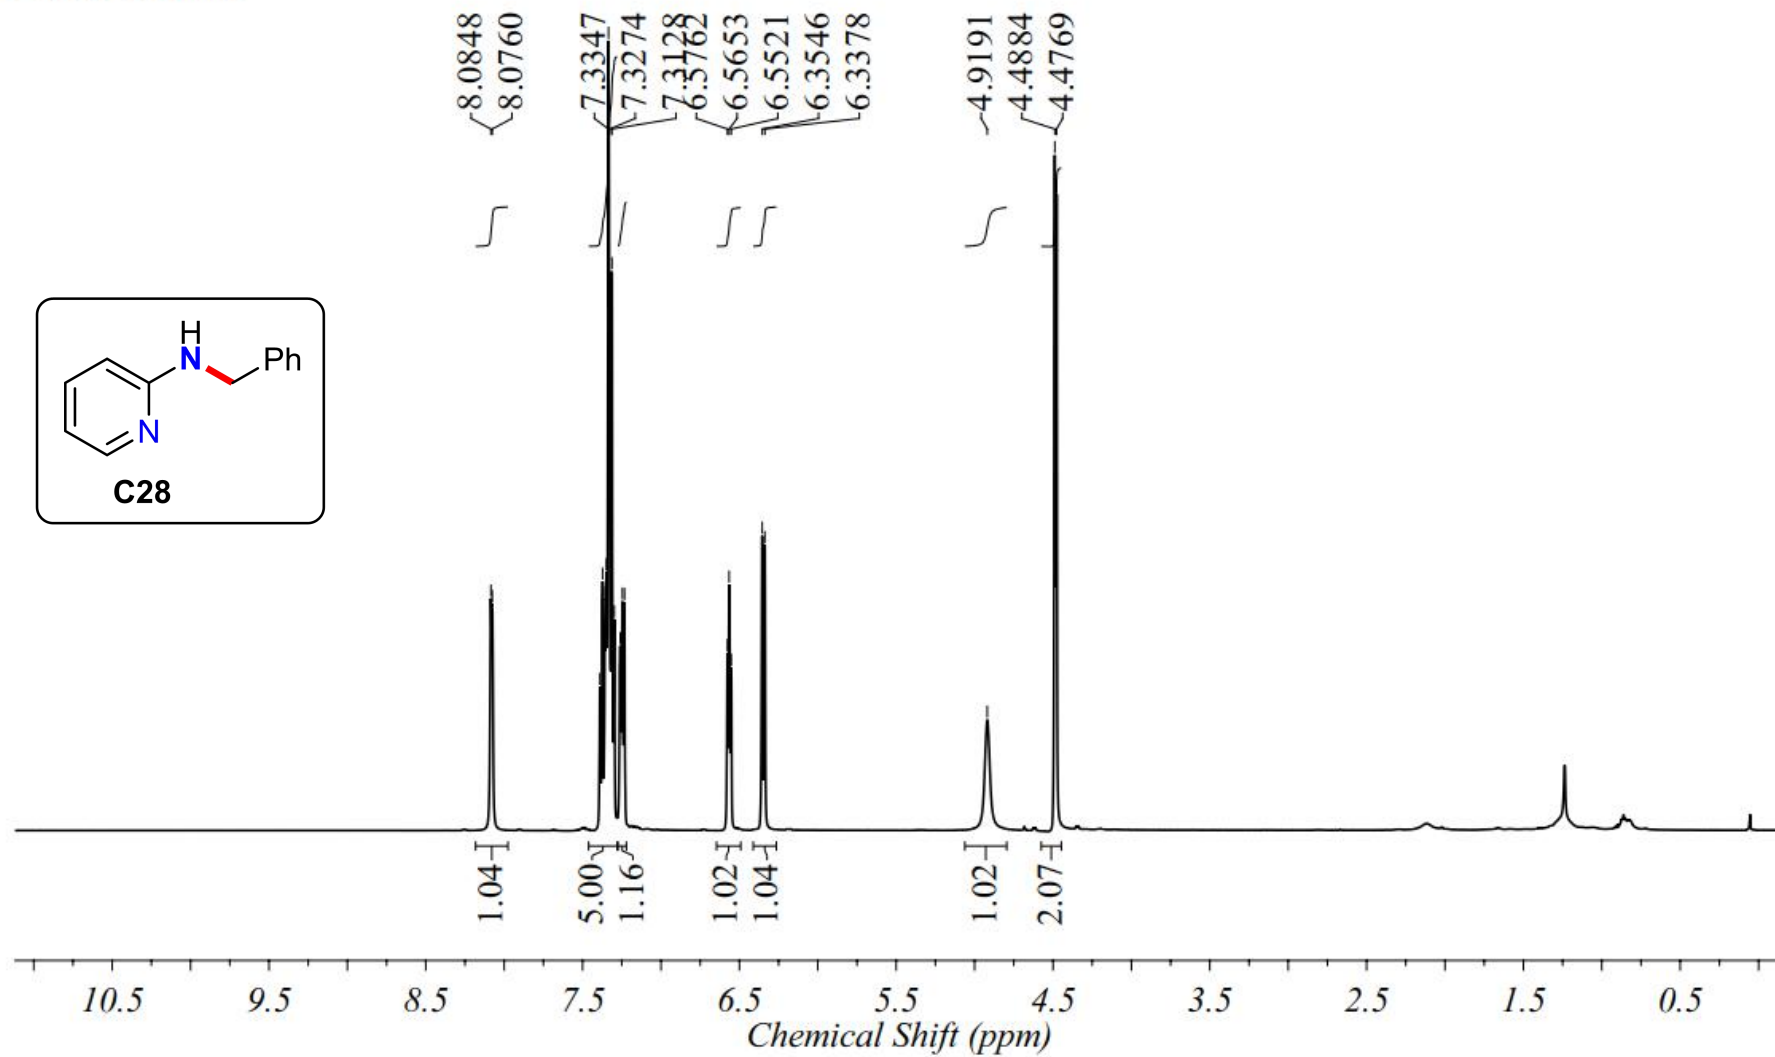

LZY-2019-10-05-3

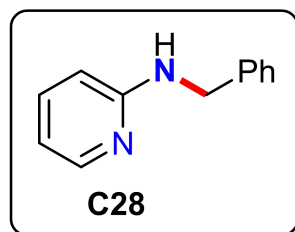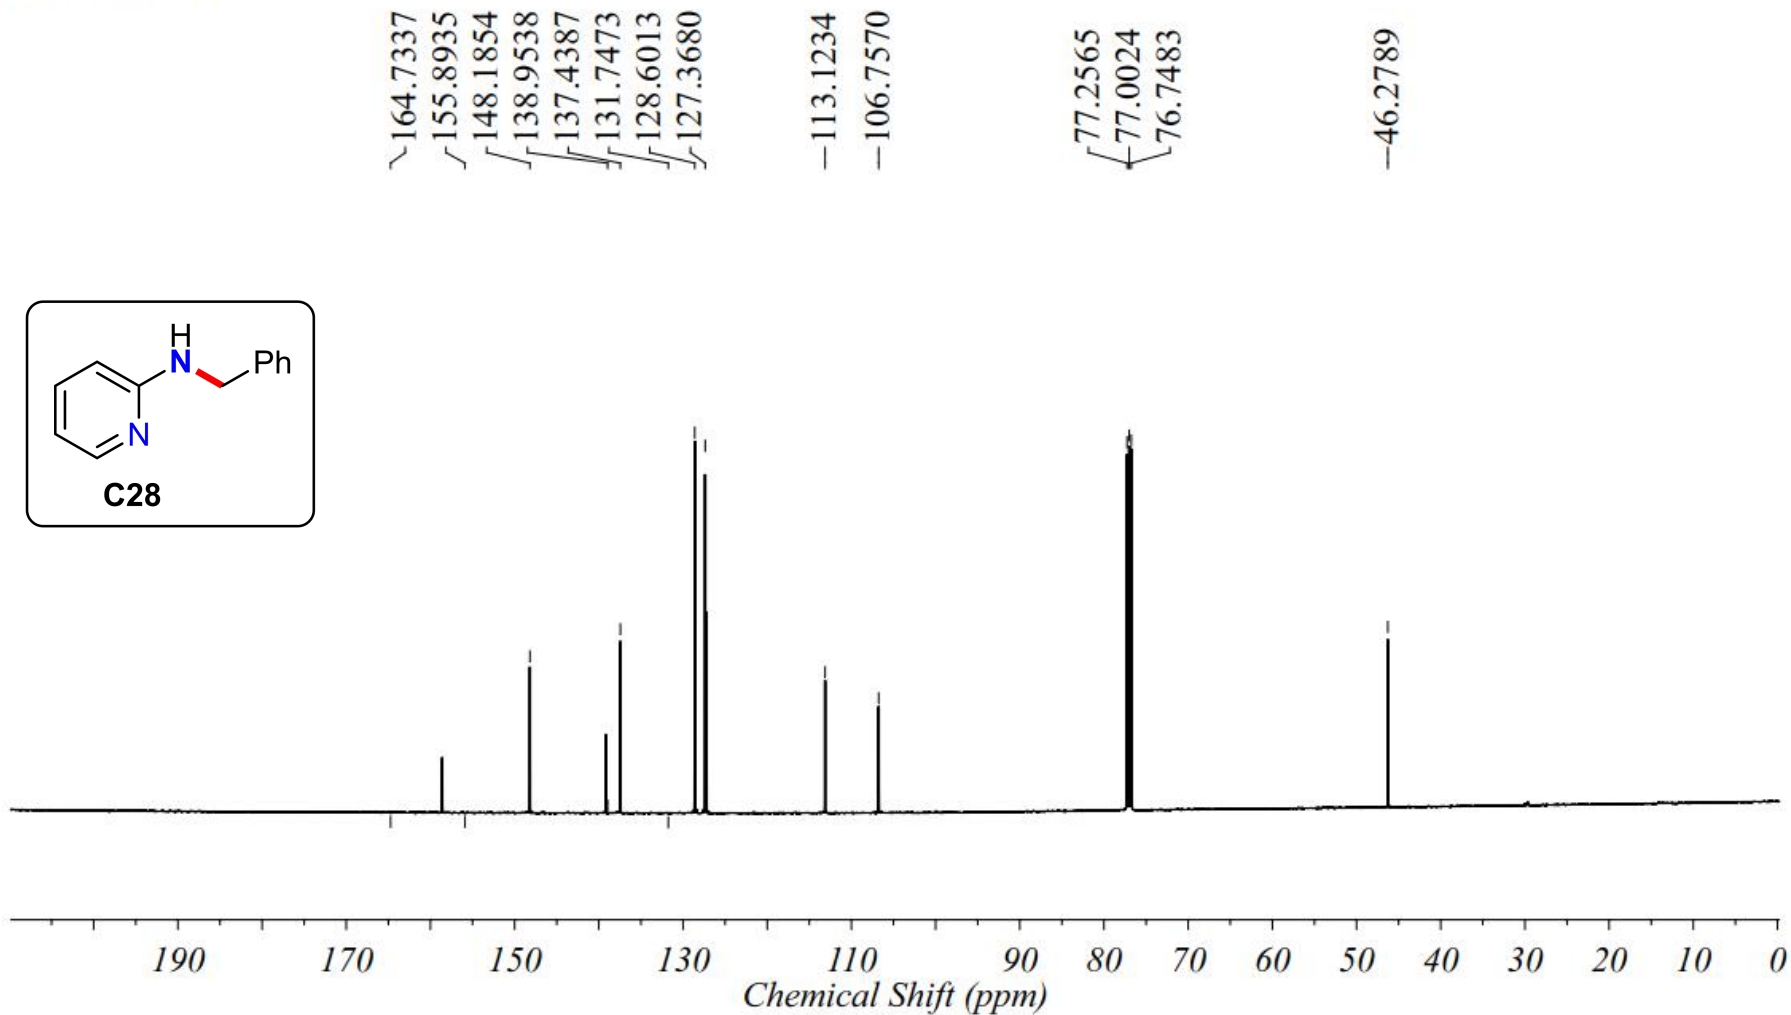

LZY-2019-10-05-4

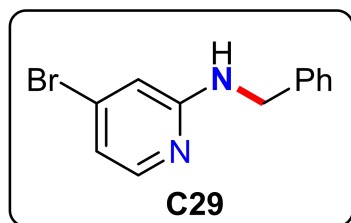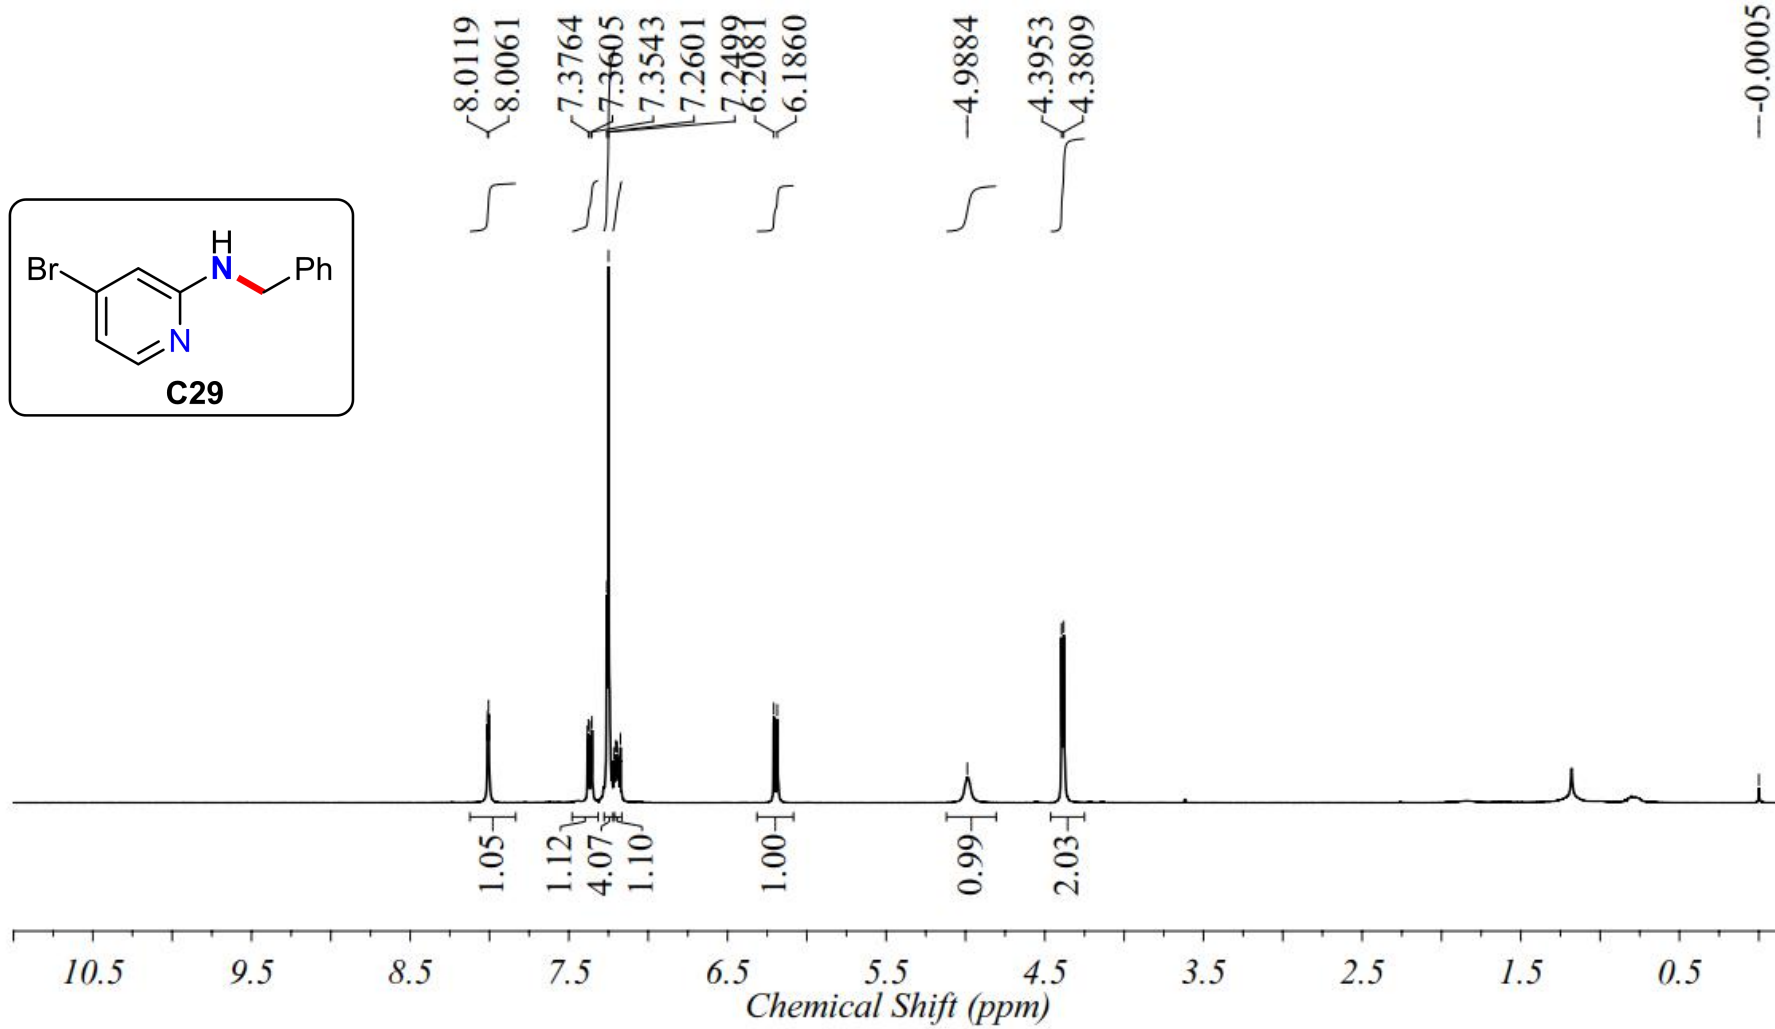

LZY-2019-10-05-4

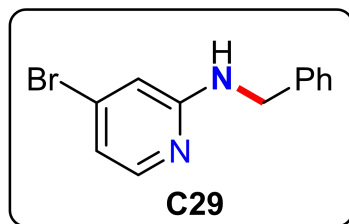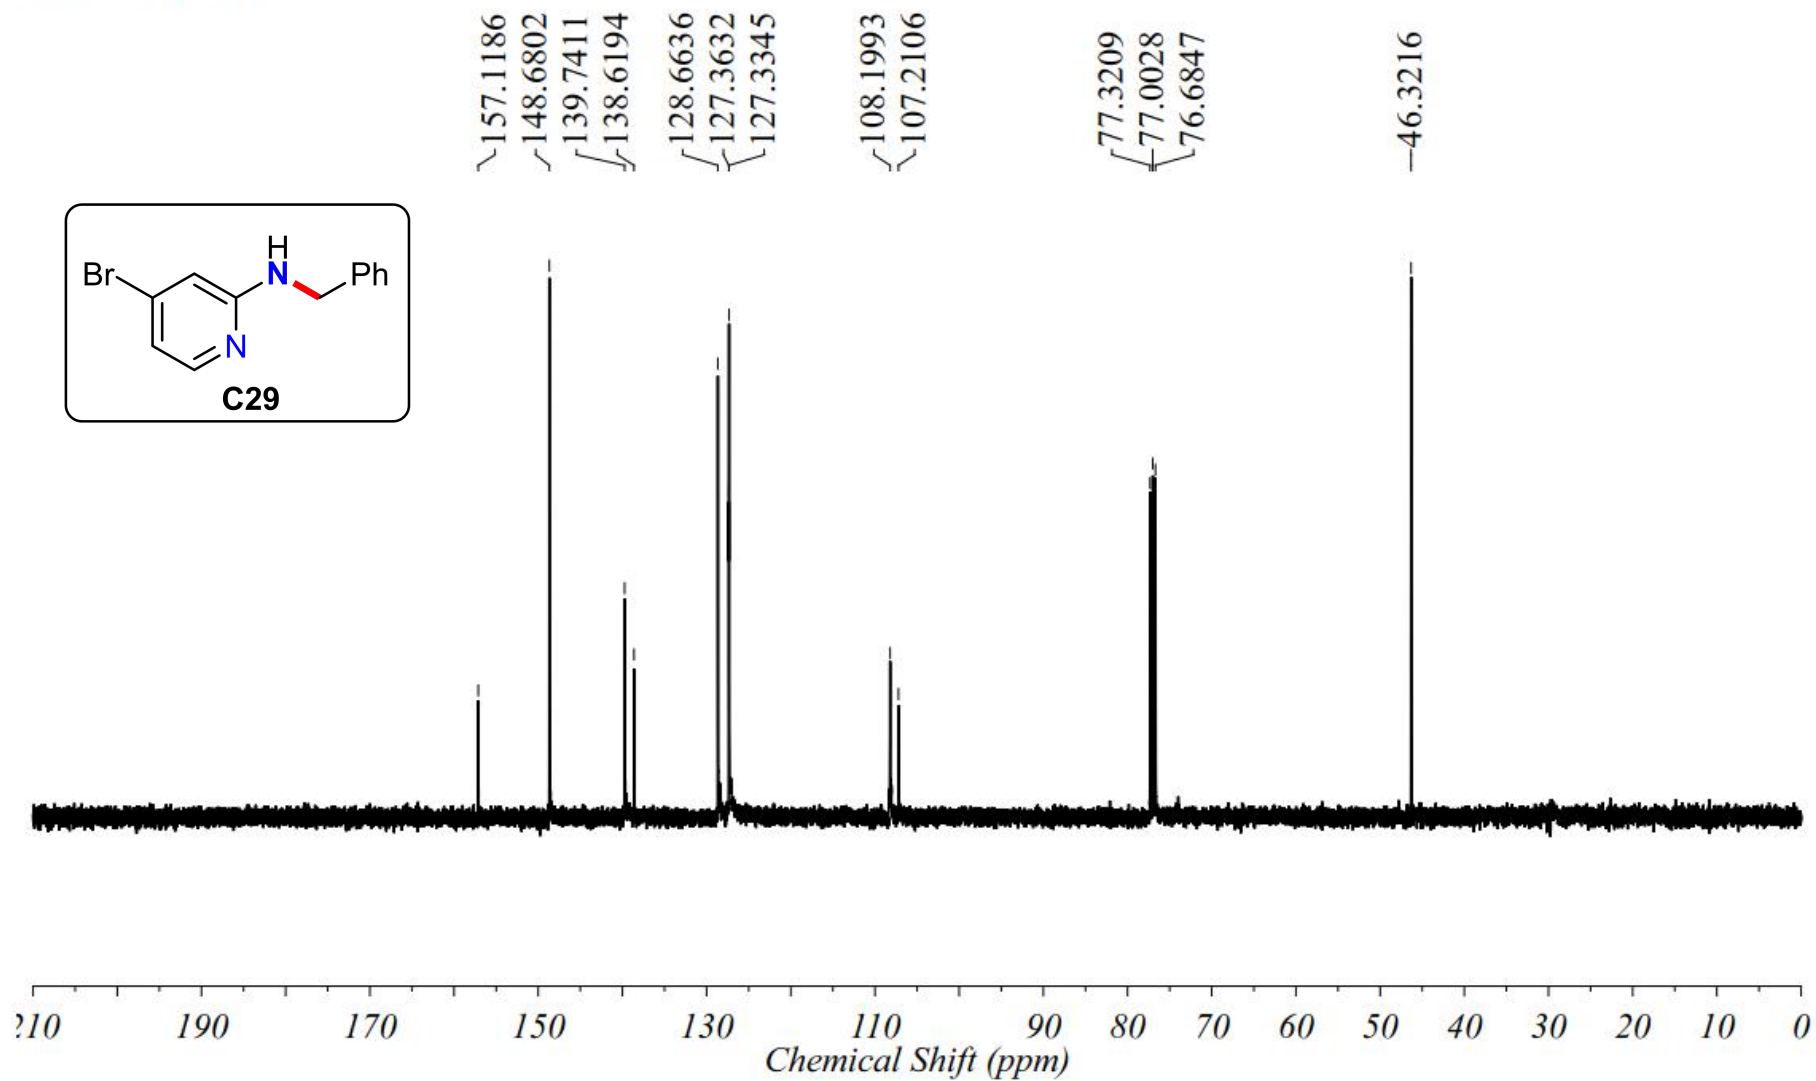

LZY-2019-10-11-1

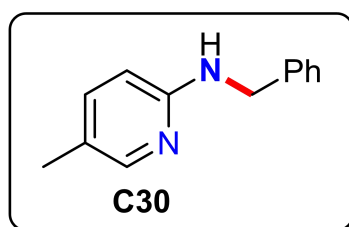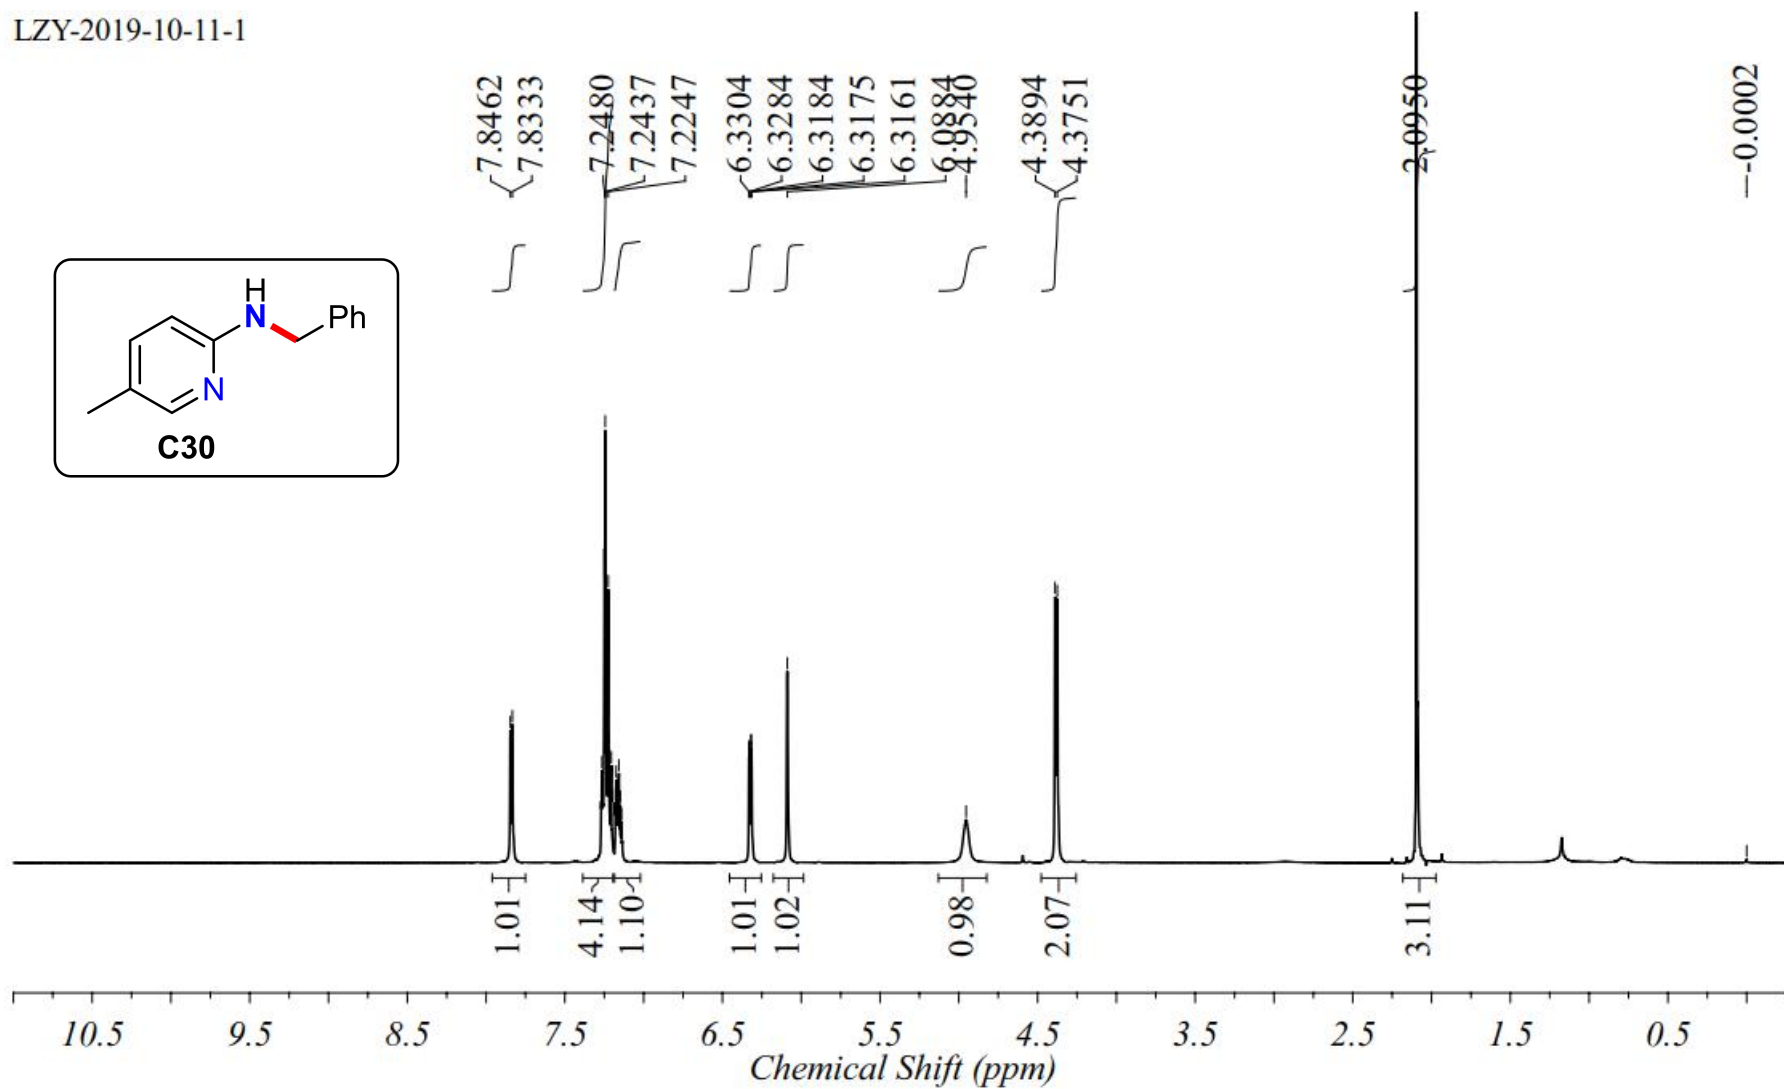

LZY-2019-10-11-1

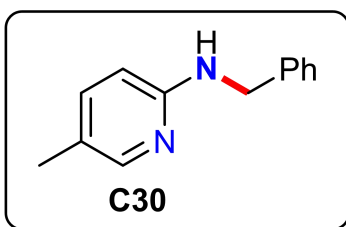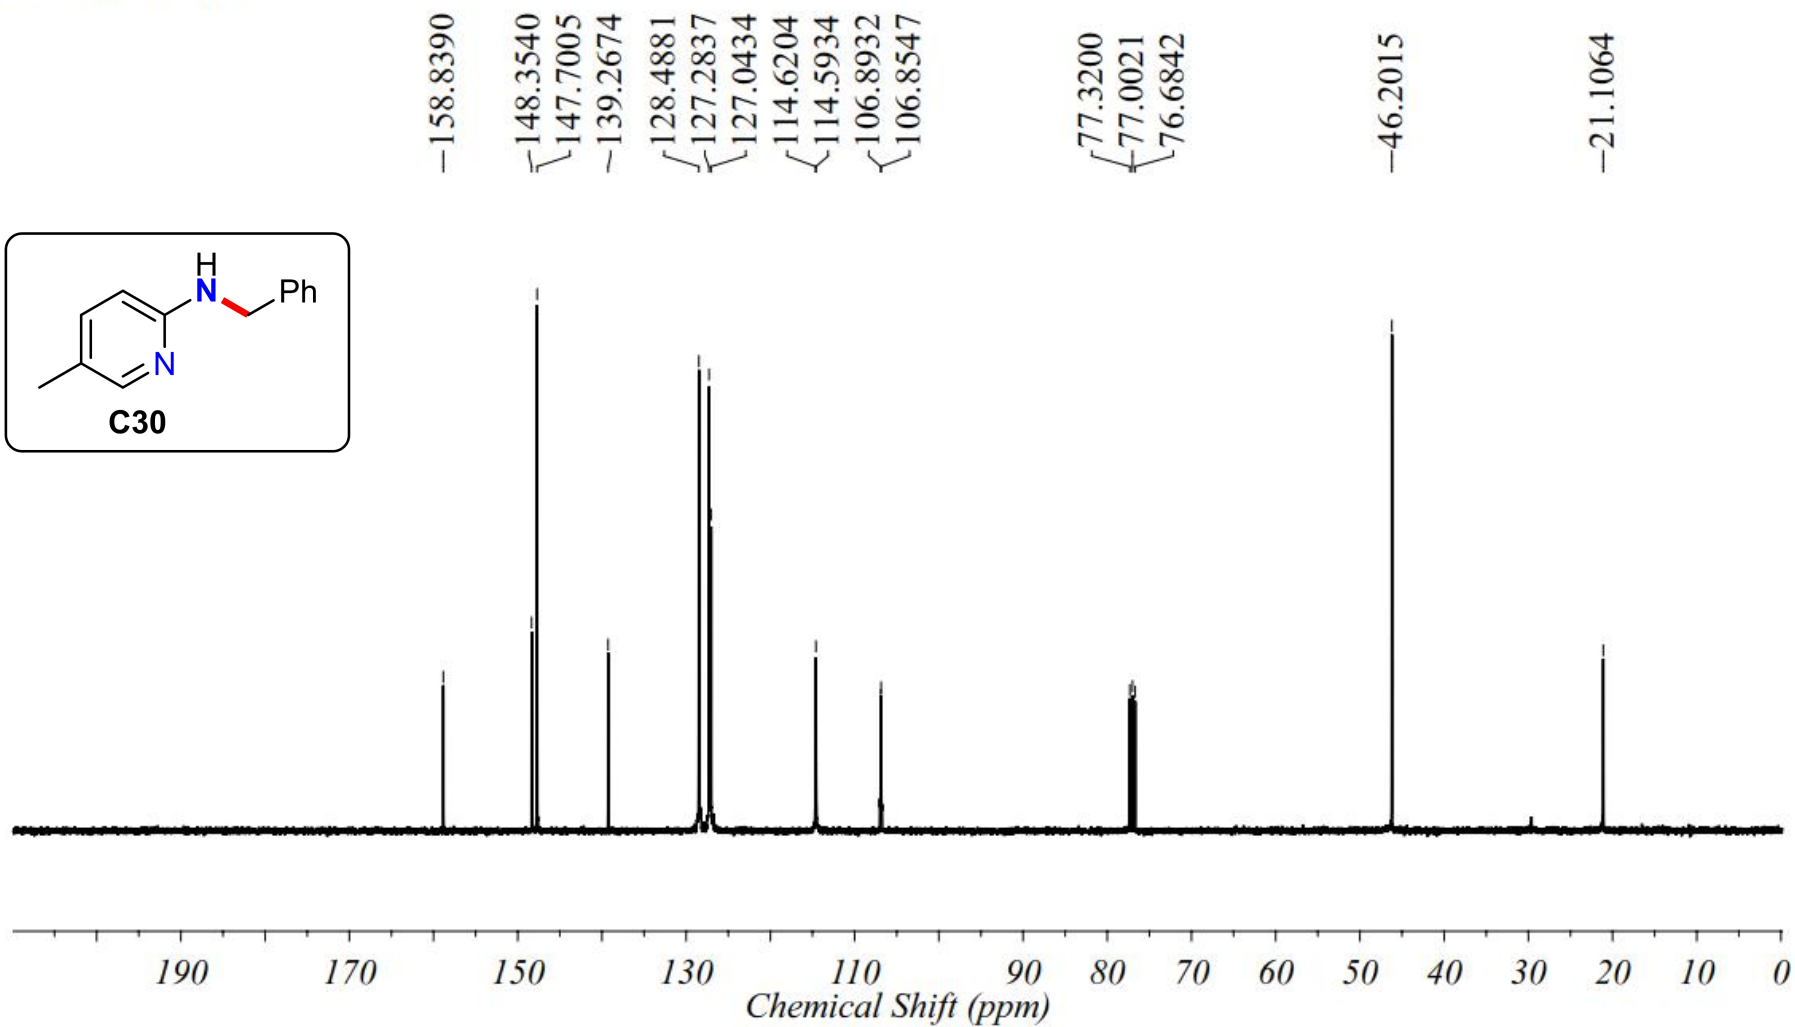

LZY-2019-10-11-2

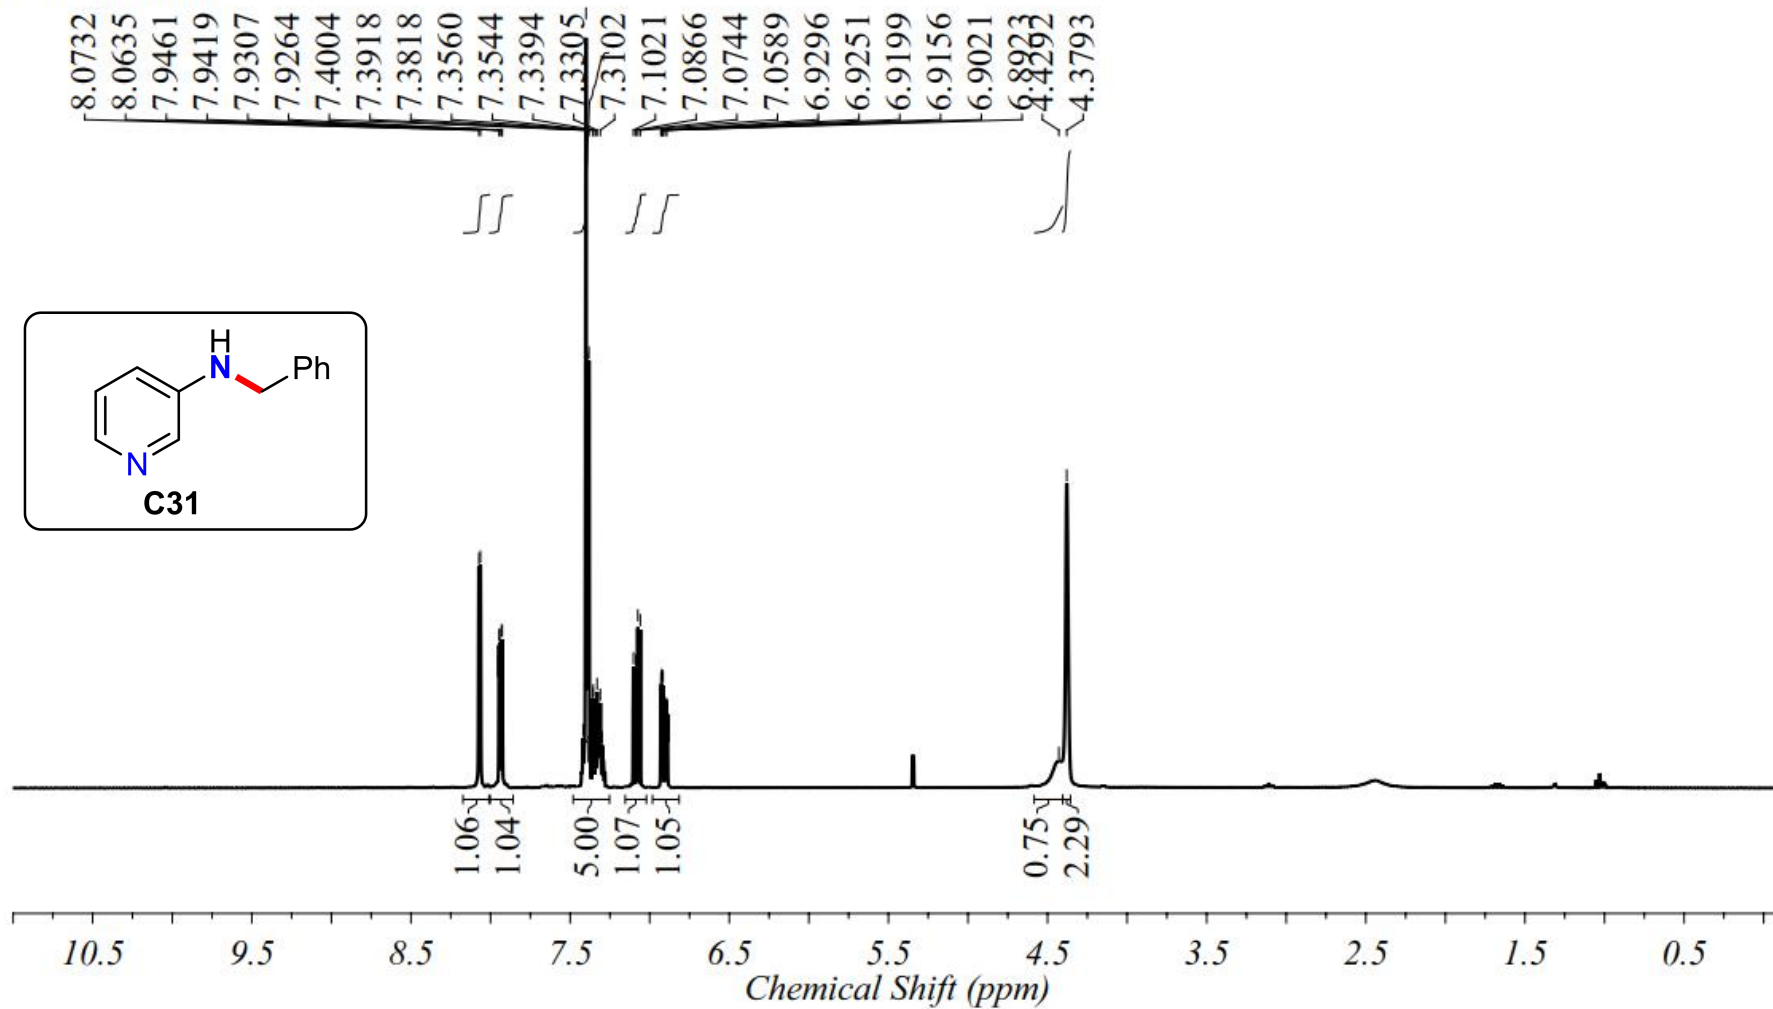

LZY-2019-10-11-2

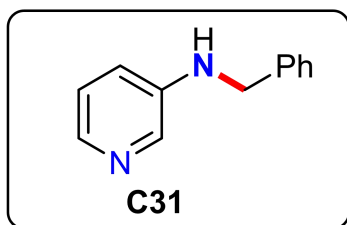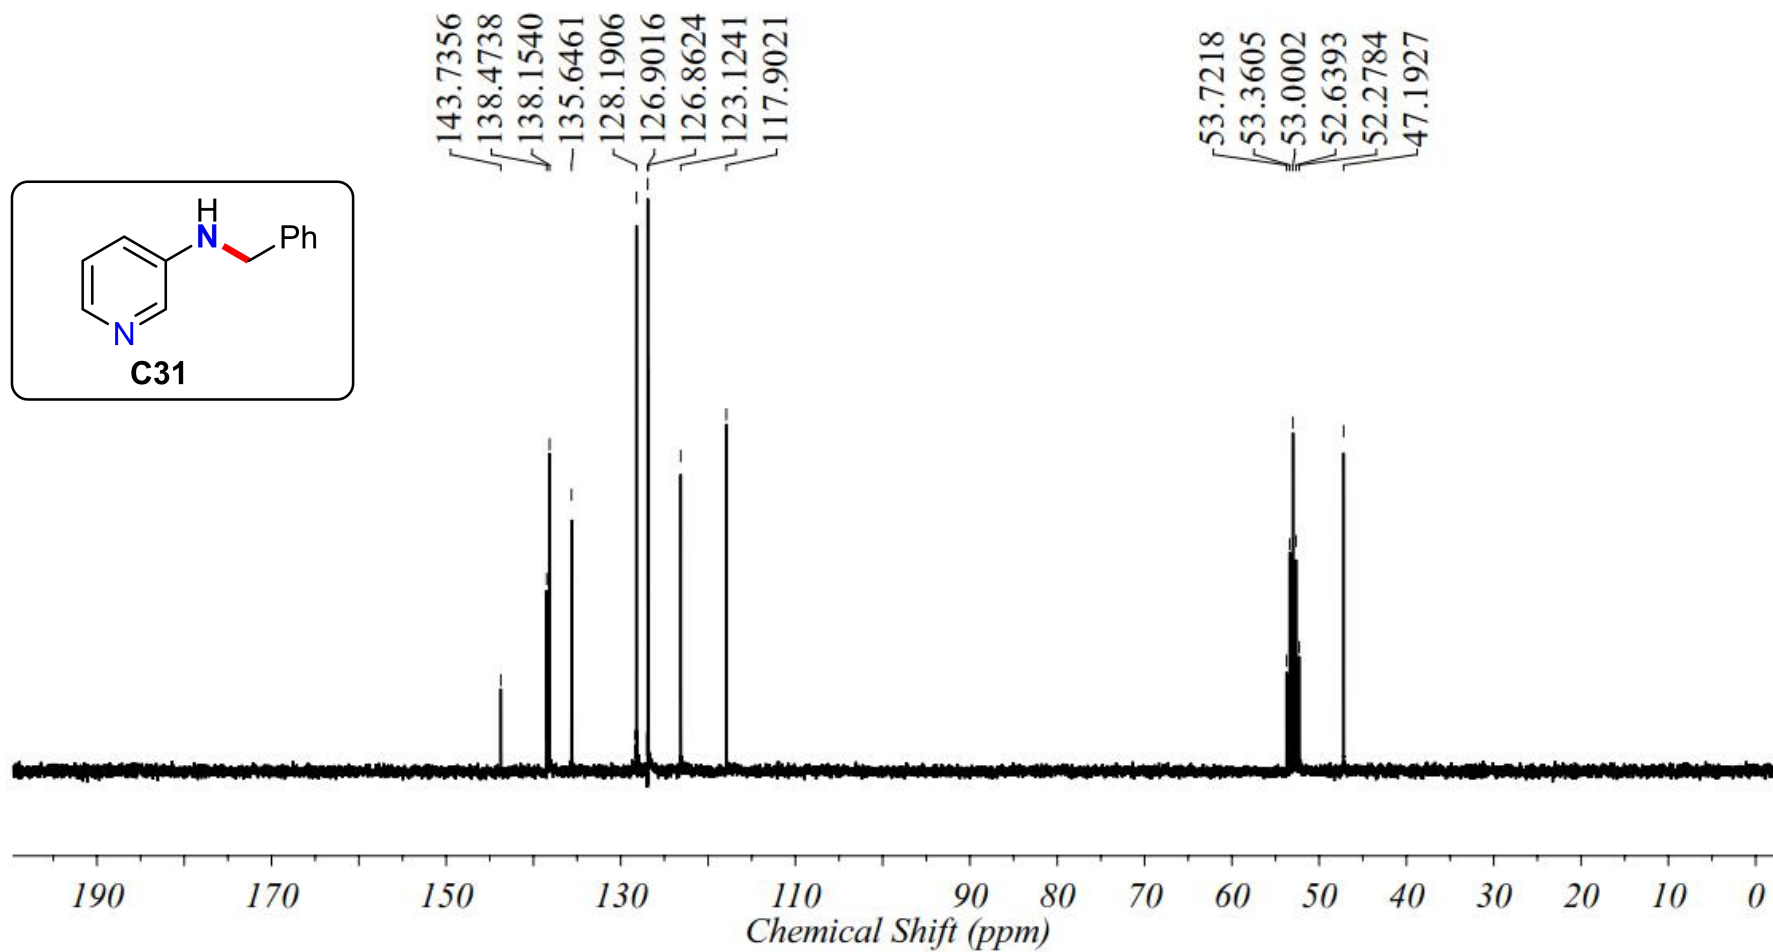



LZY-2019-10-11-3

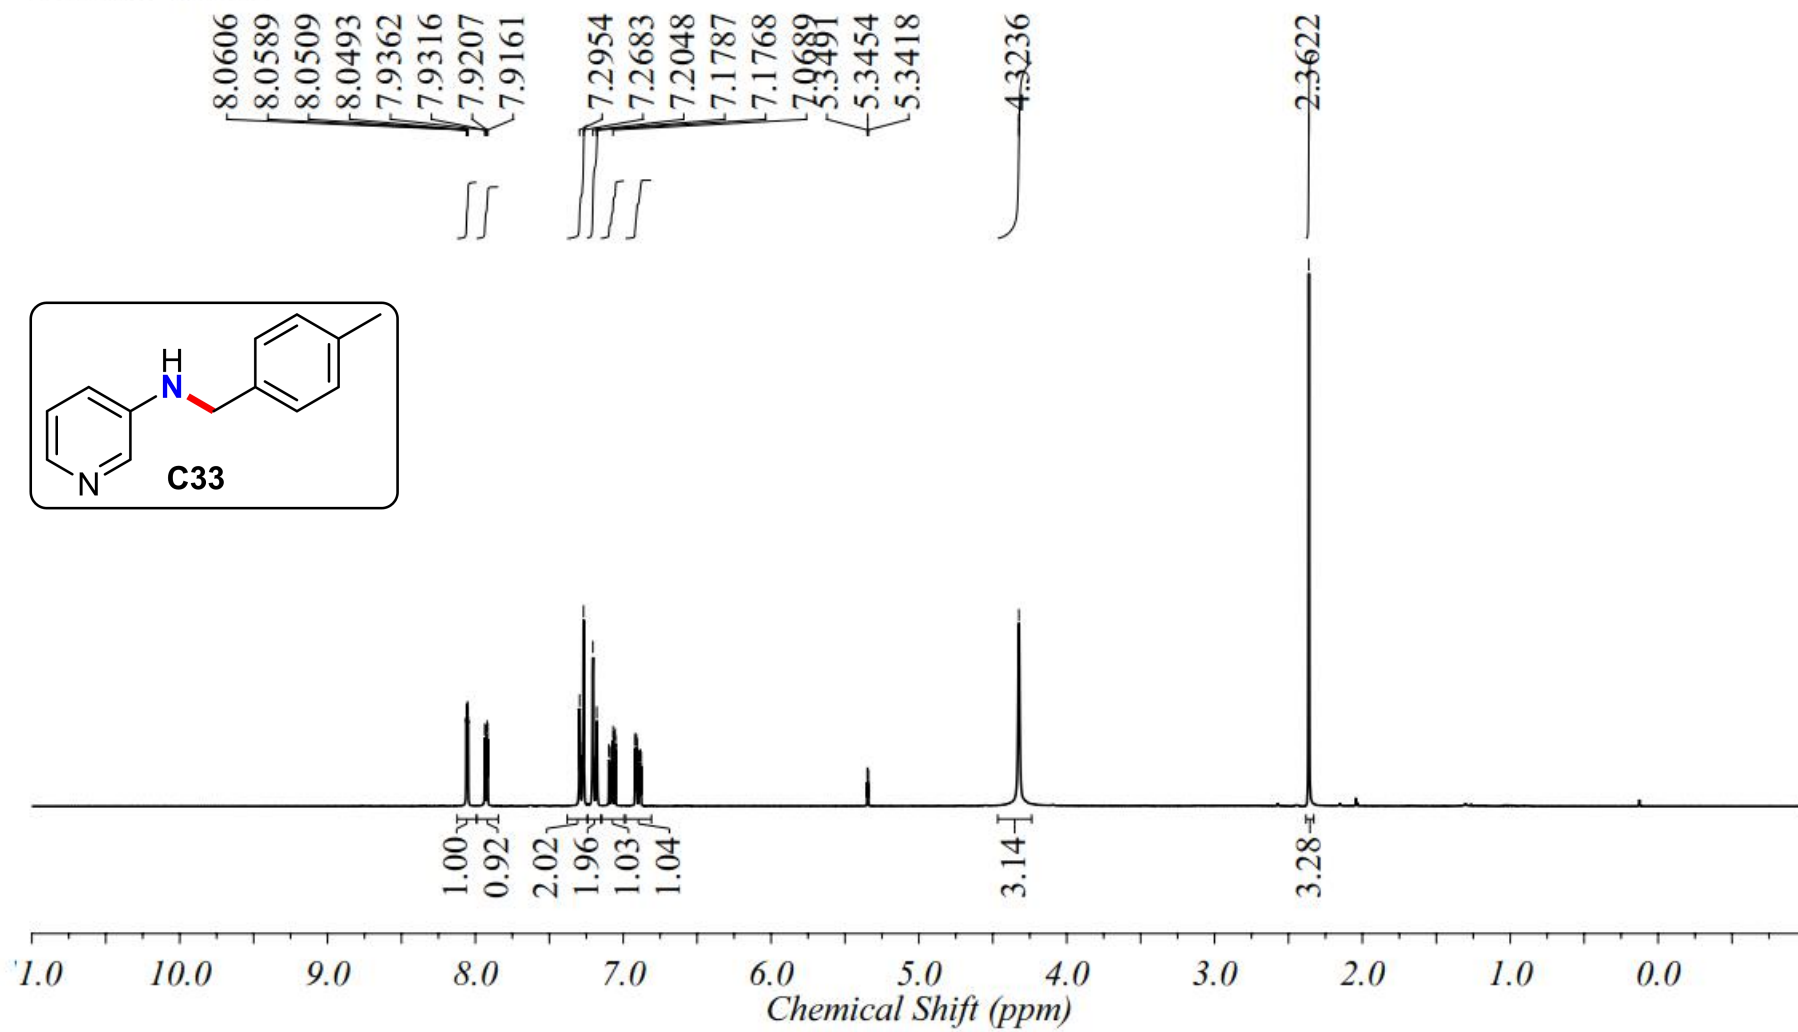

LZY-2019-10-11-3

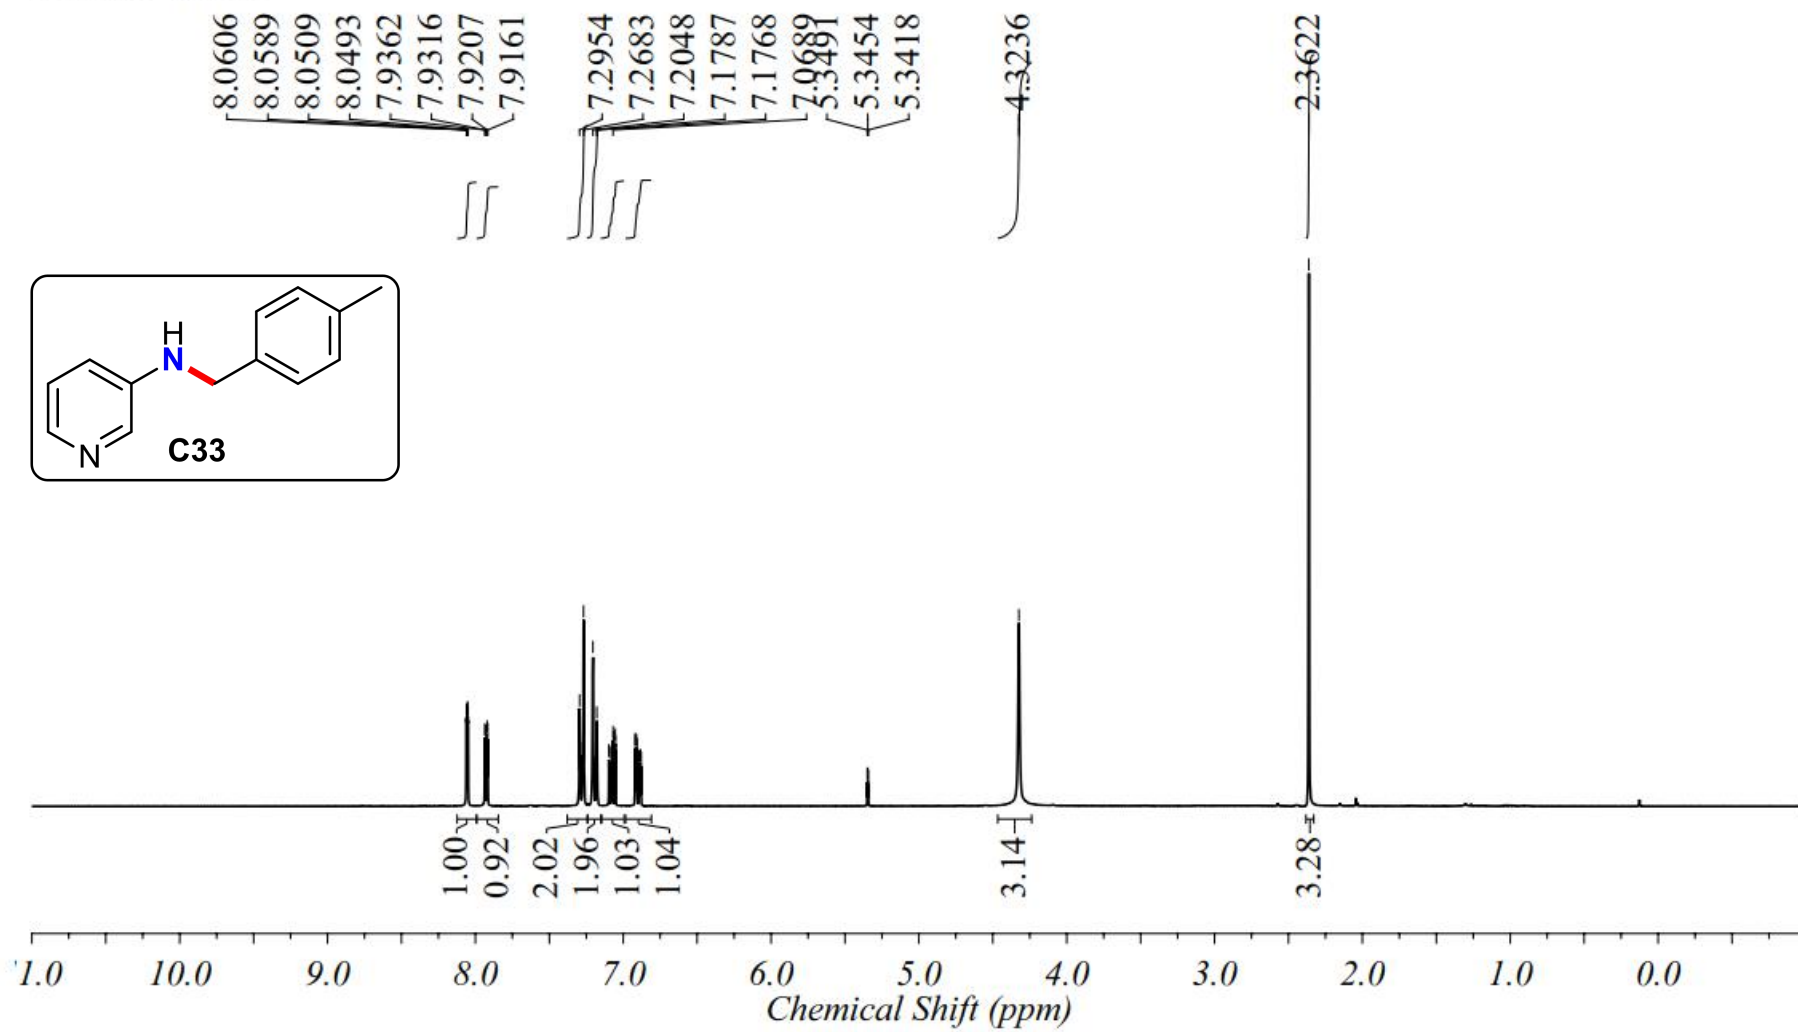

LZY-2019-10-11-4

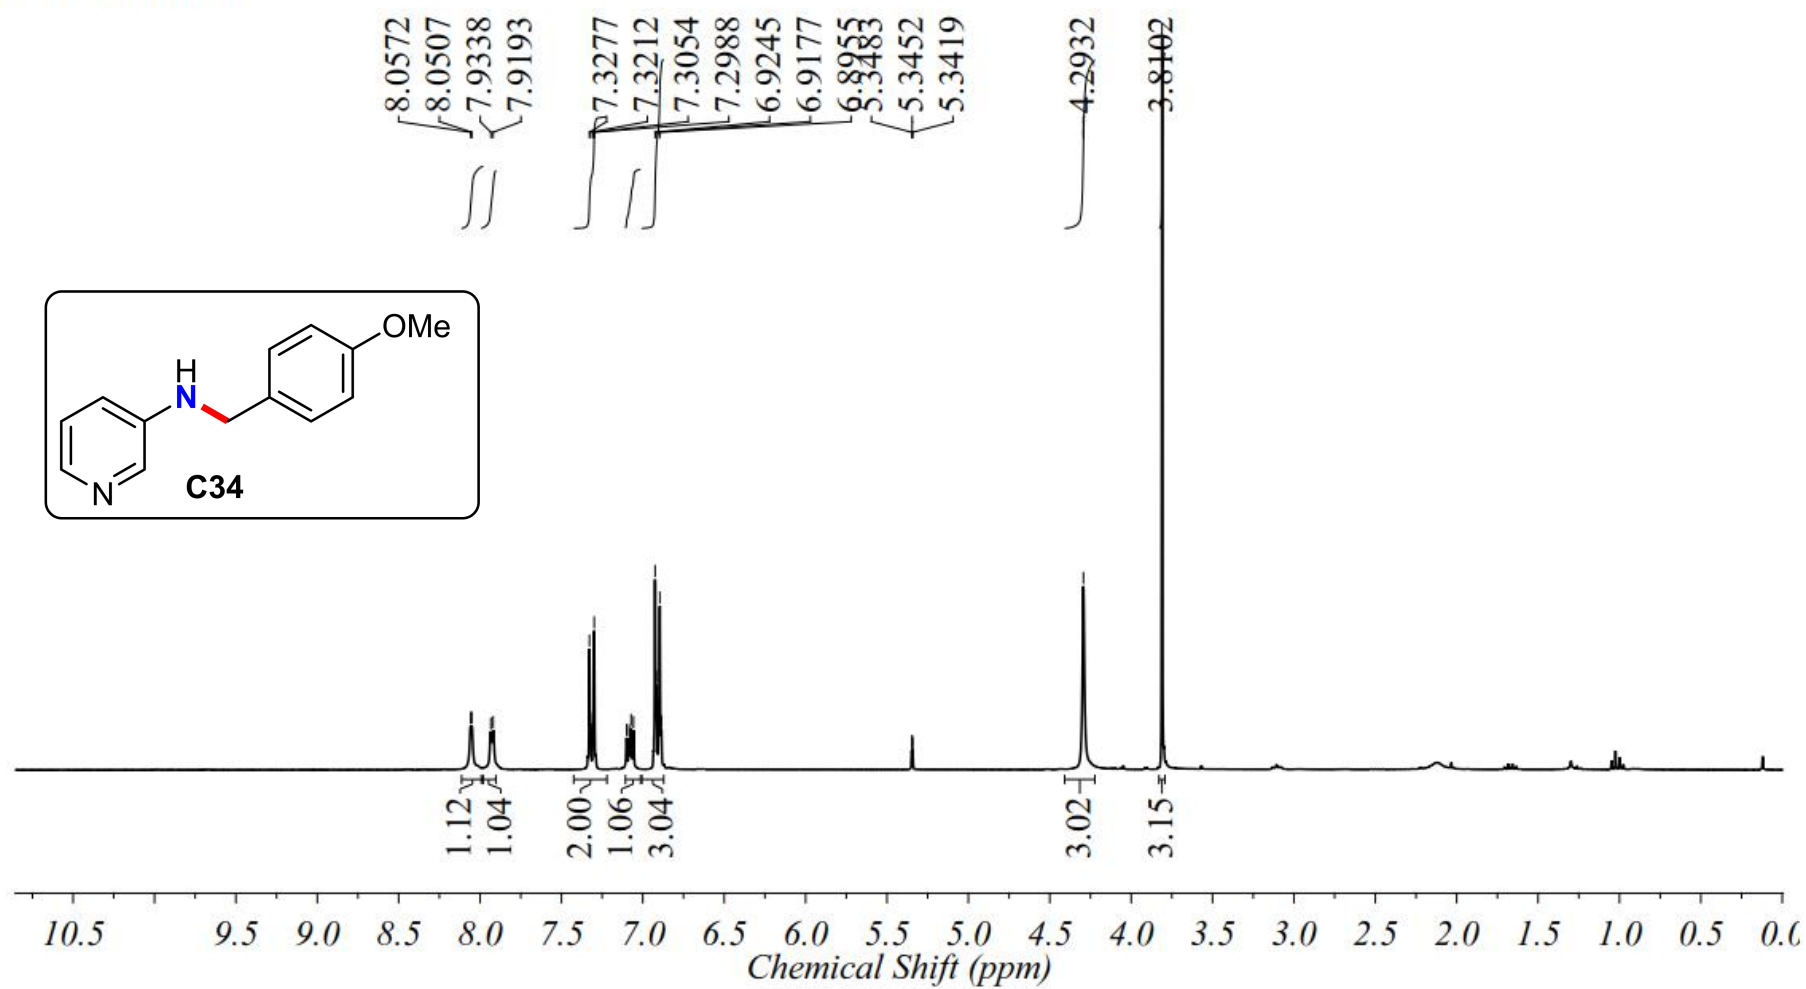

LZY-2019-10-11-4

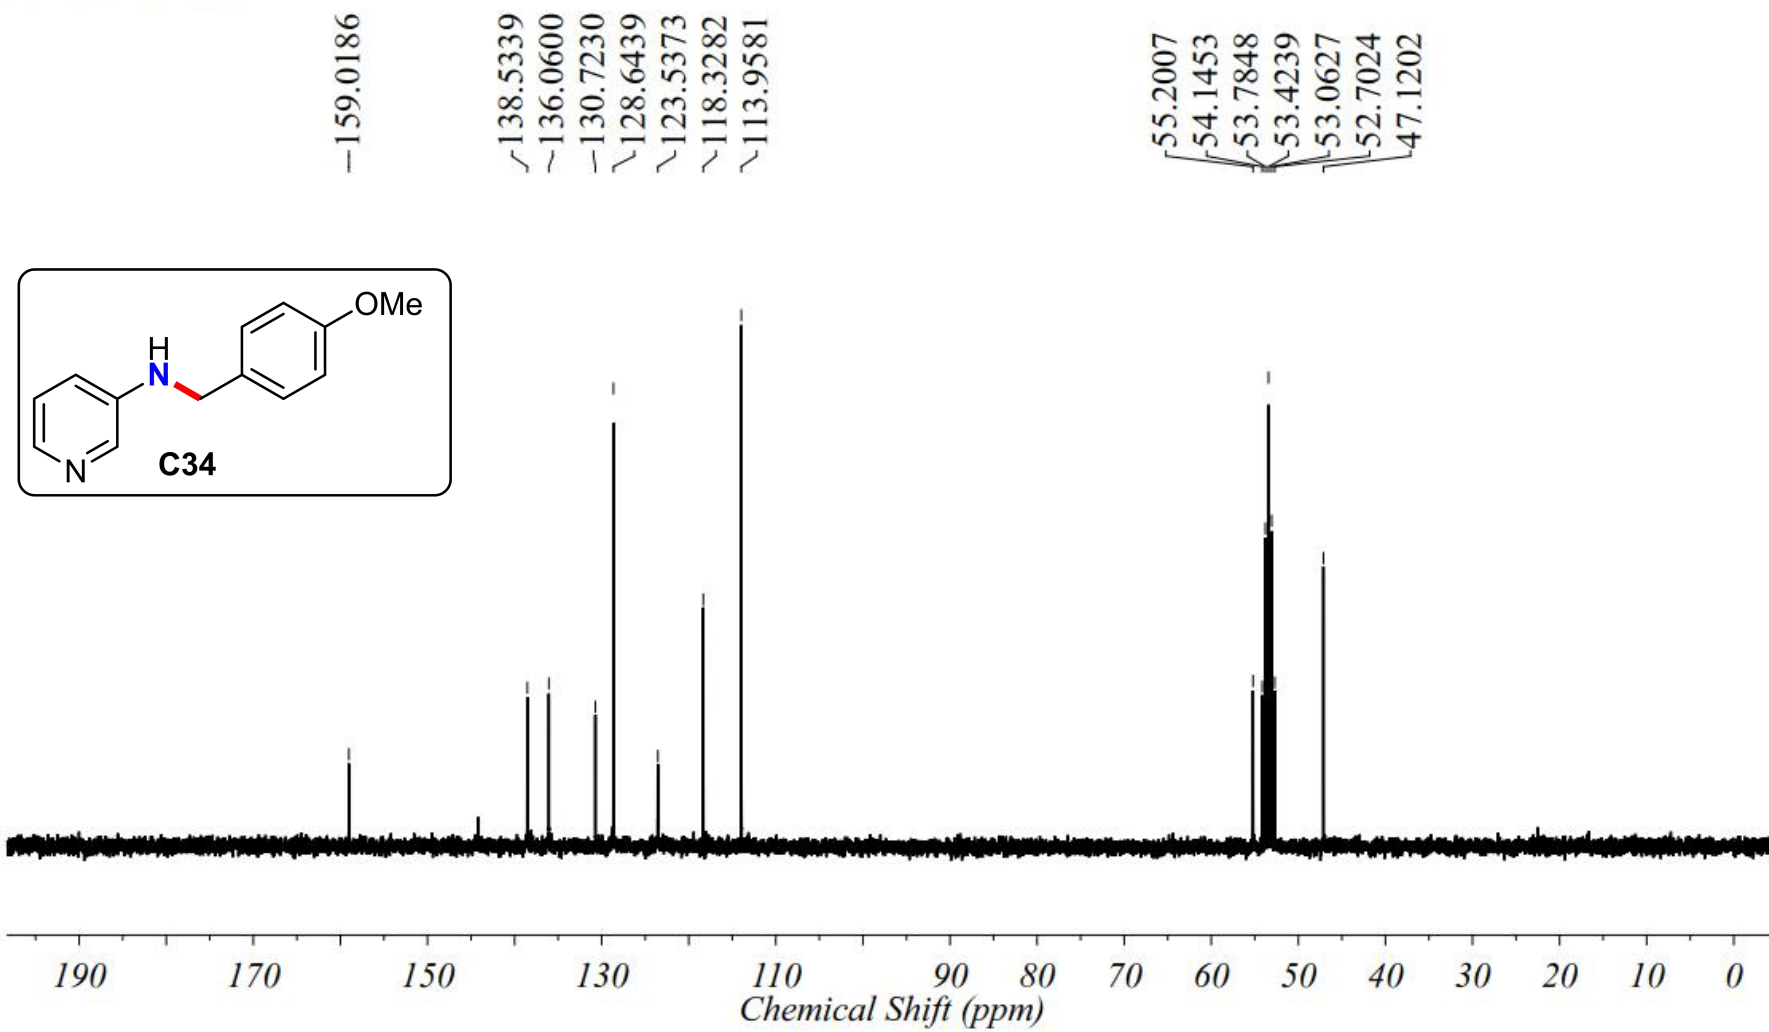

LZY-2019-10-15-1

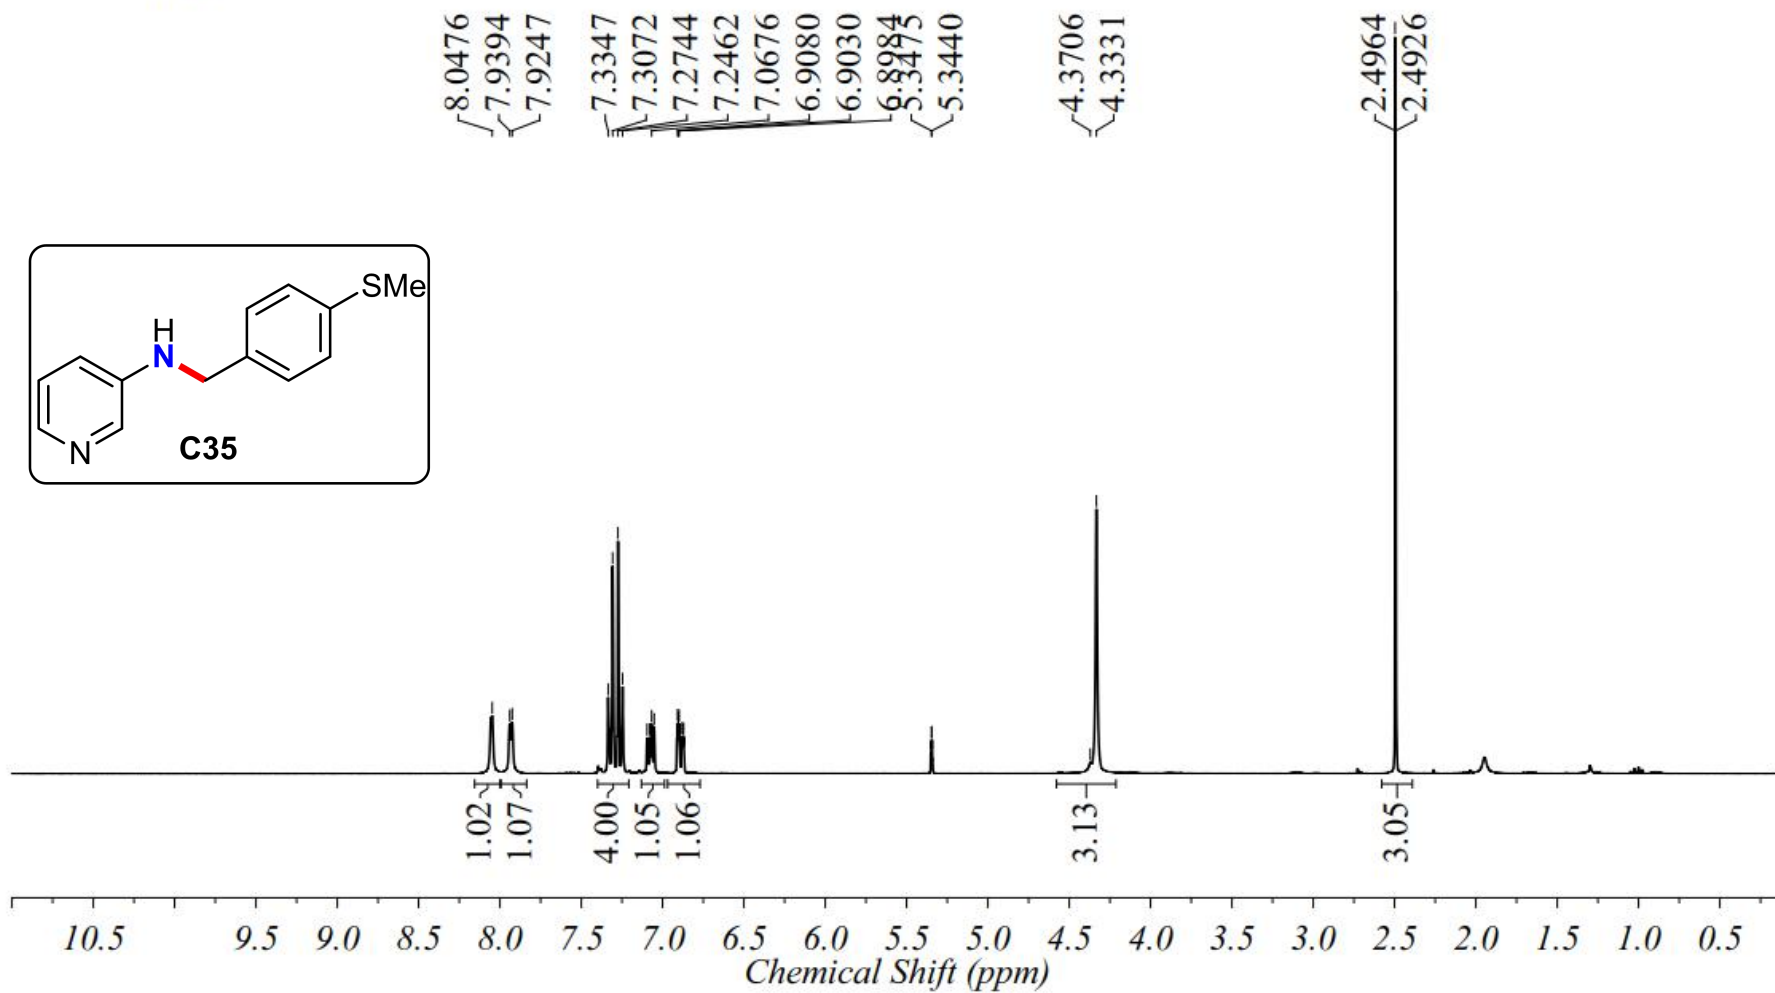

LZY-2019-10-15-1

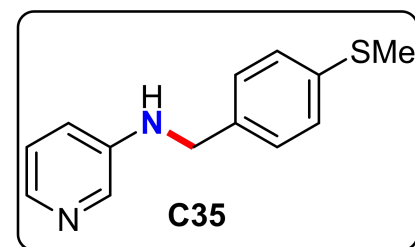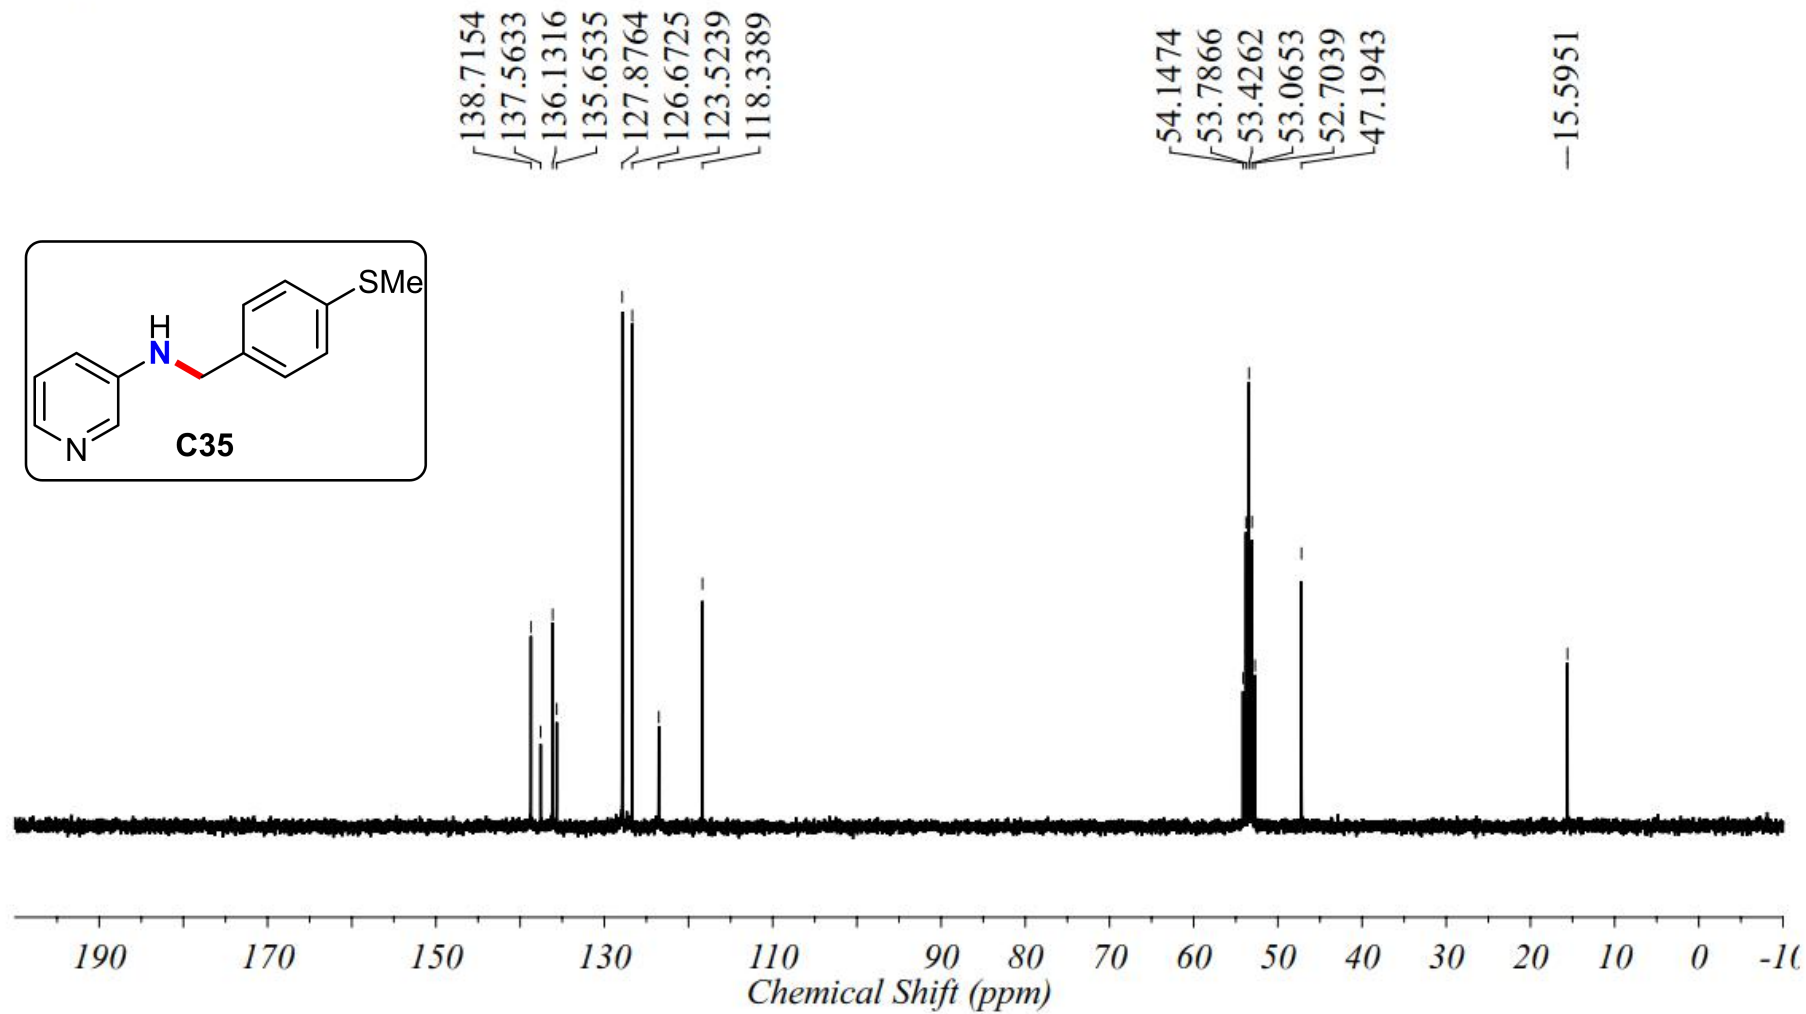

LZY-2019-10-15-2

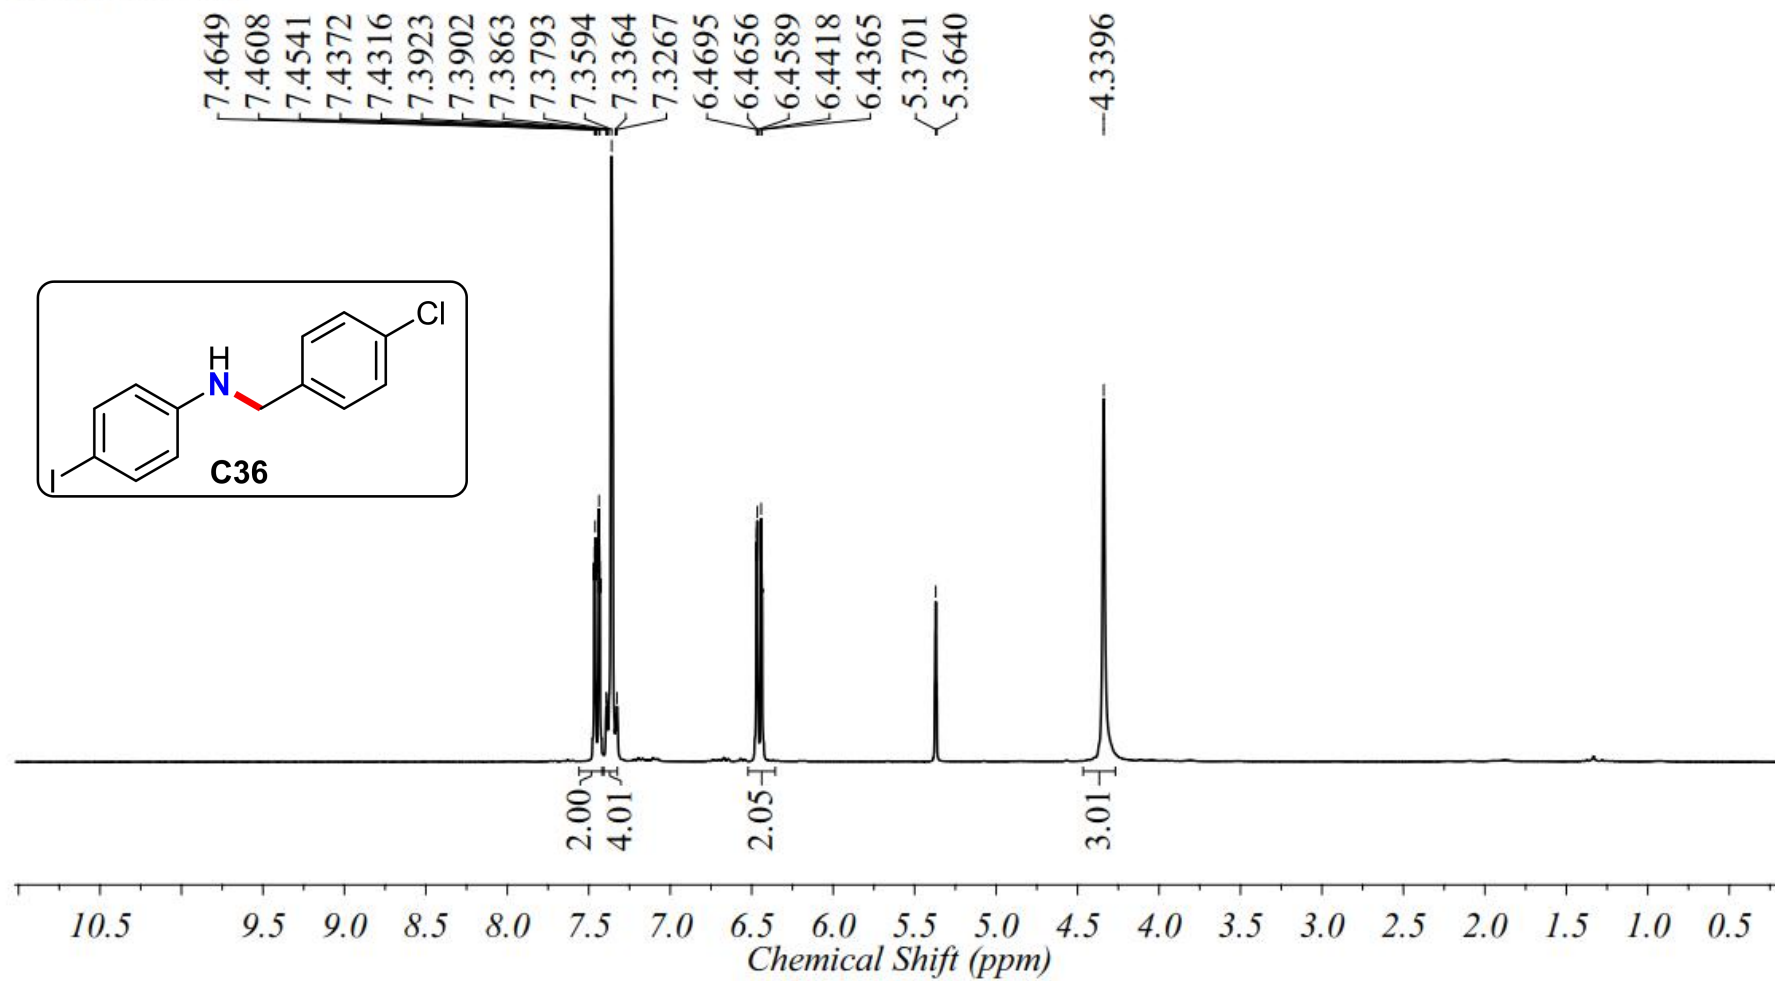

LZY-2019-10-15-2

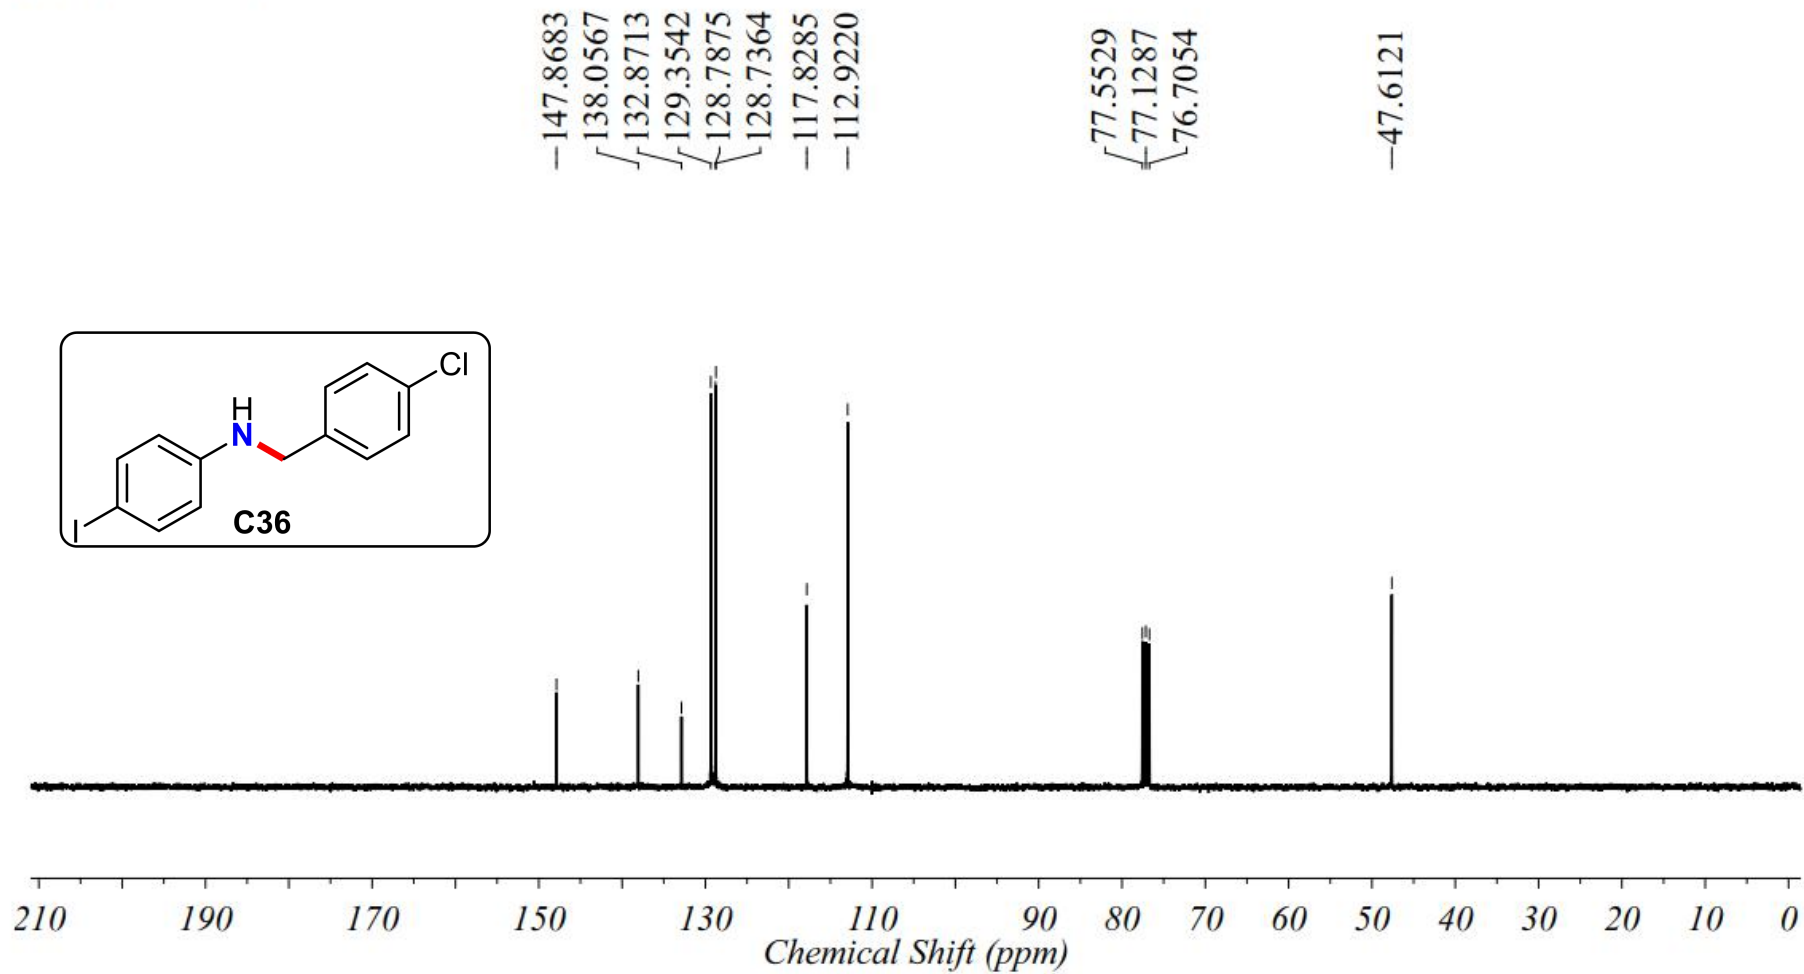



LZY-2019-10-15-3

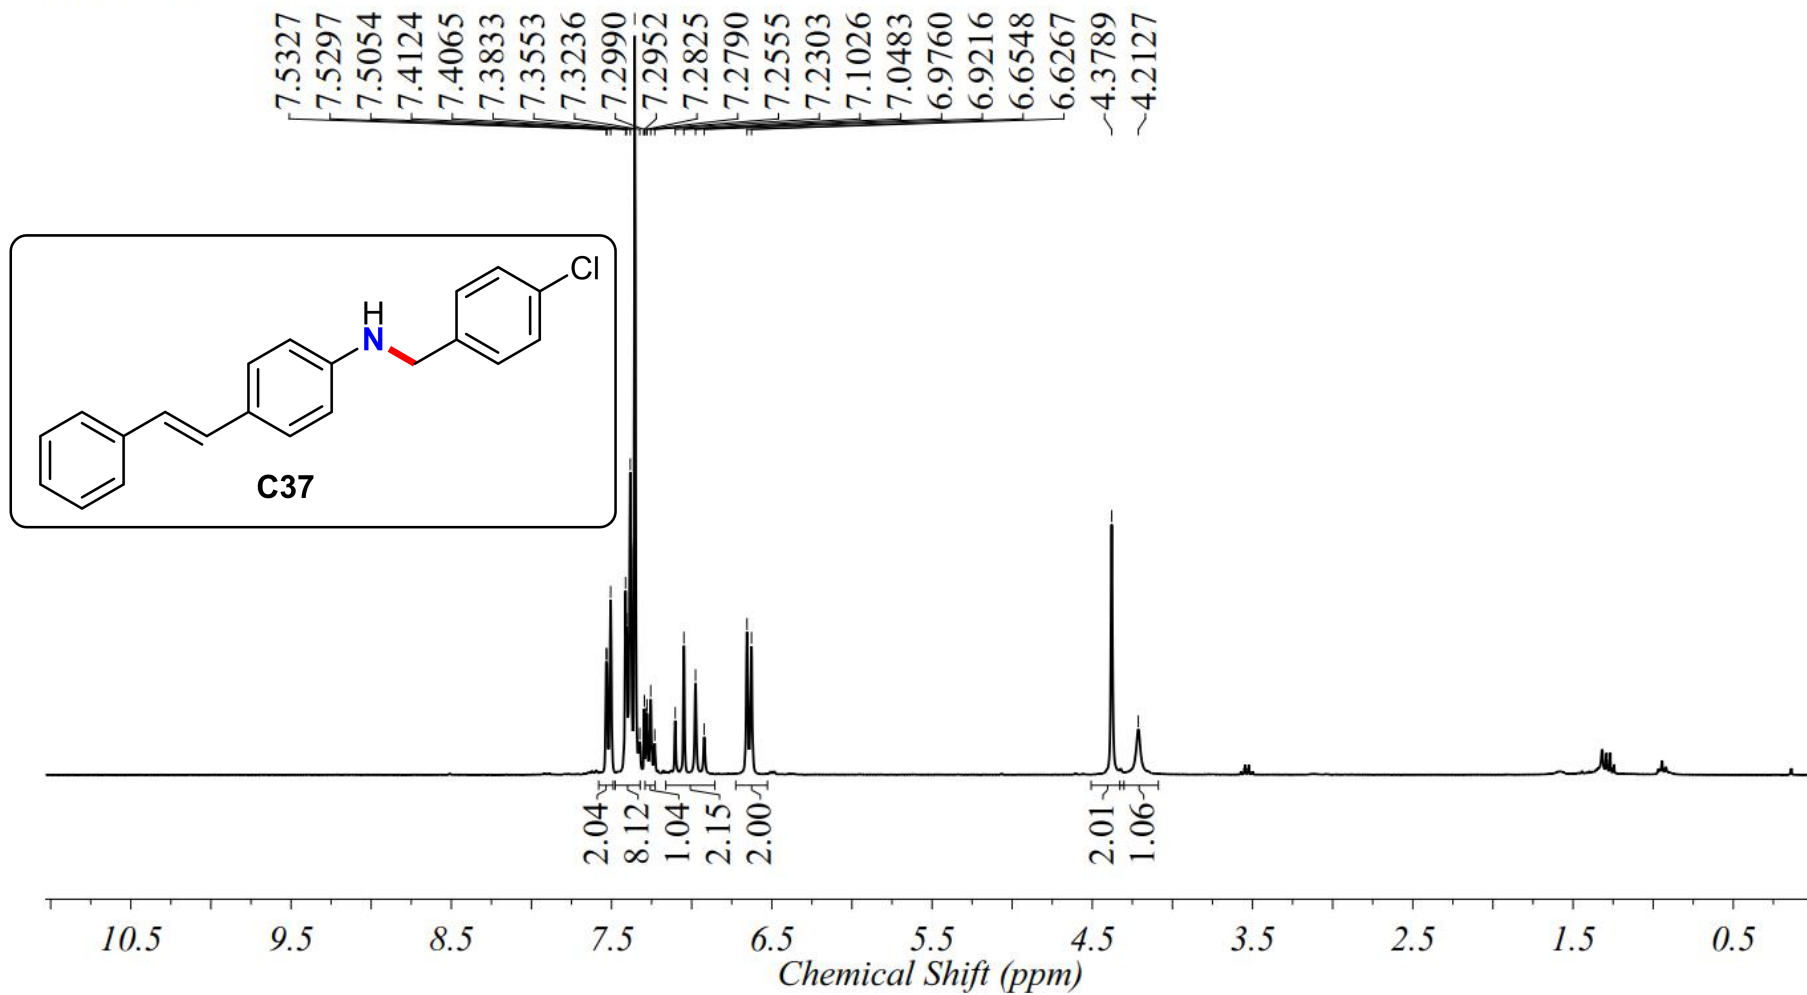

LZY-2019-10-15-3

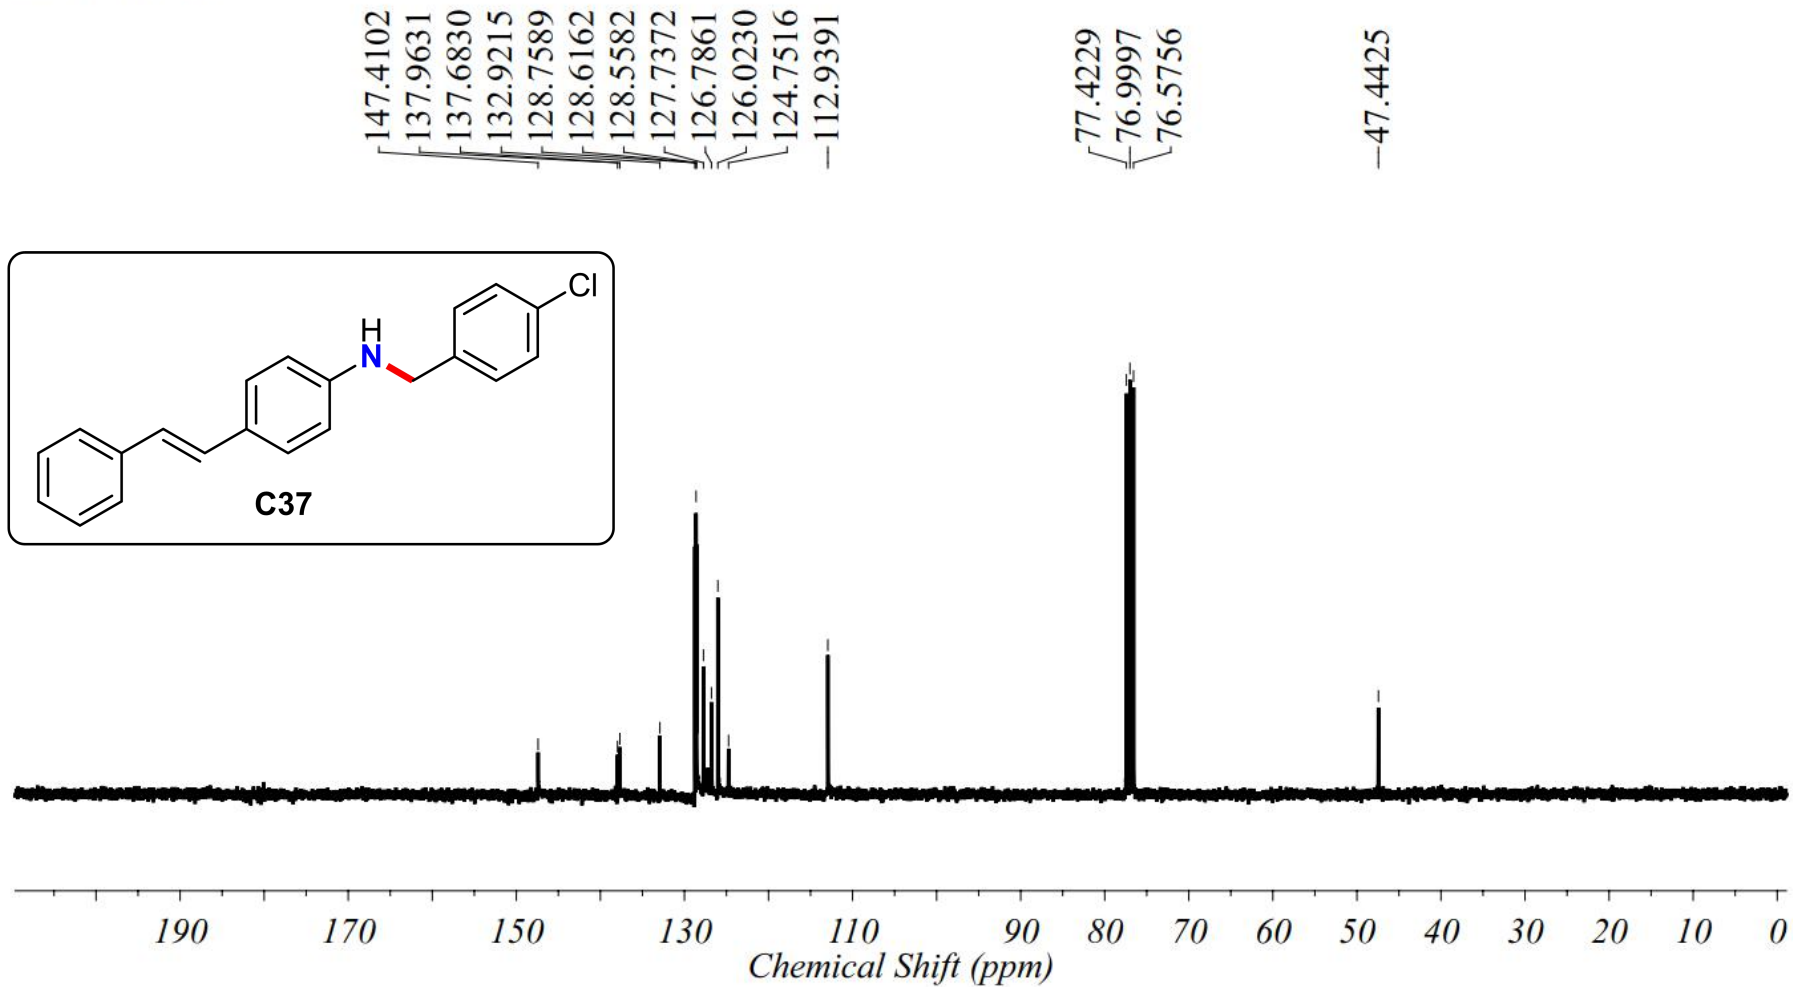

LZY-2019-10-15-4

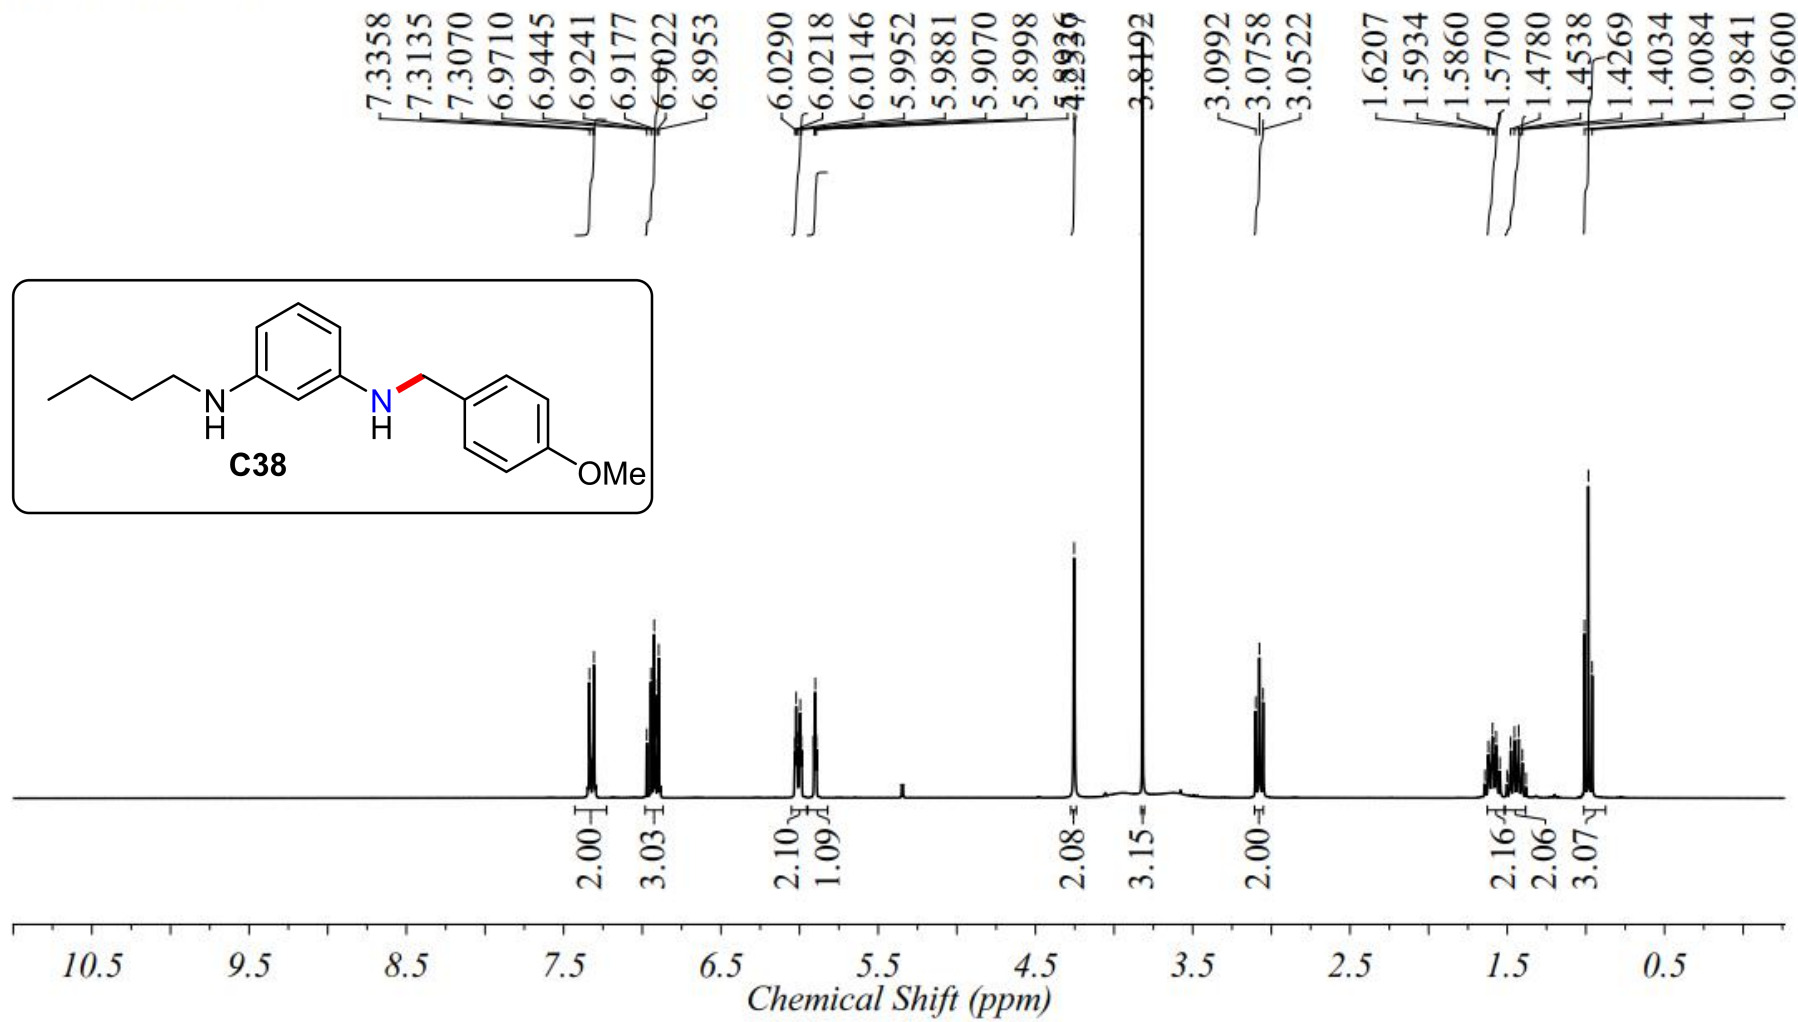

LZY-2019-10-15-4

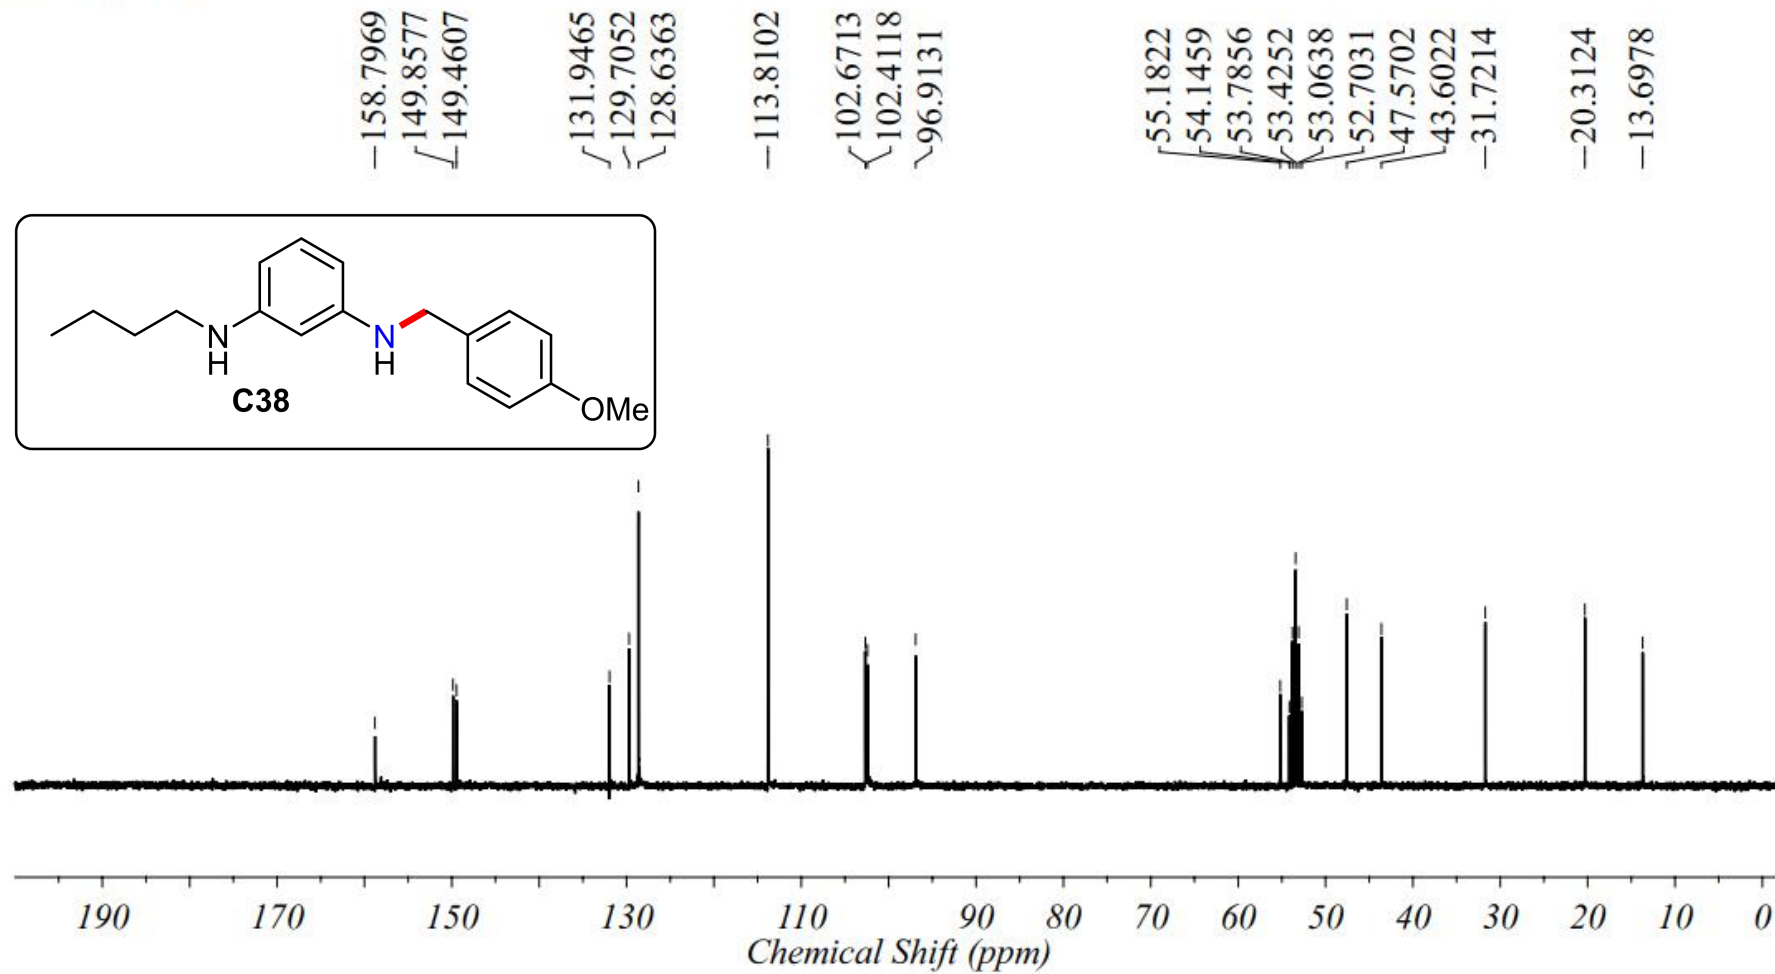

LZY-2019-10-18-1

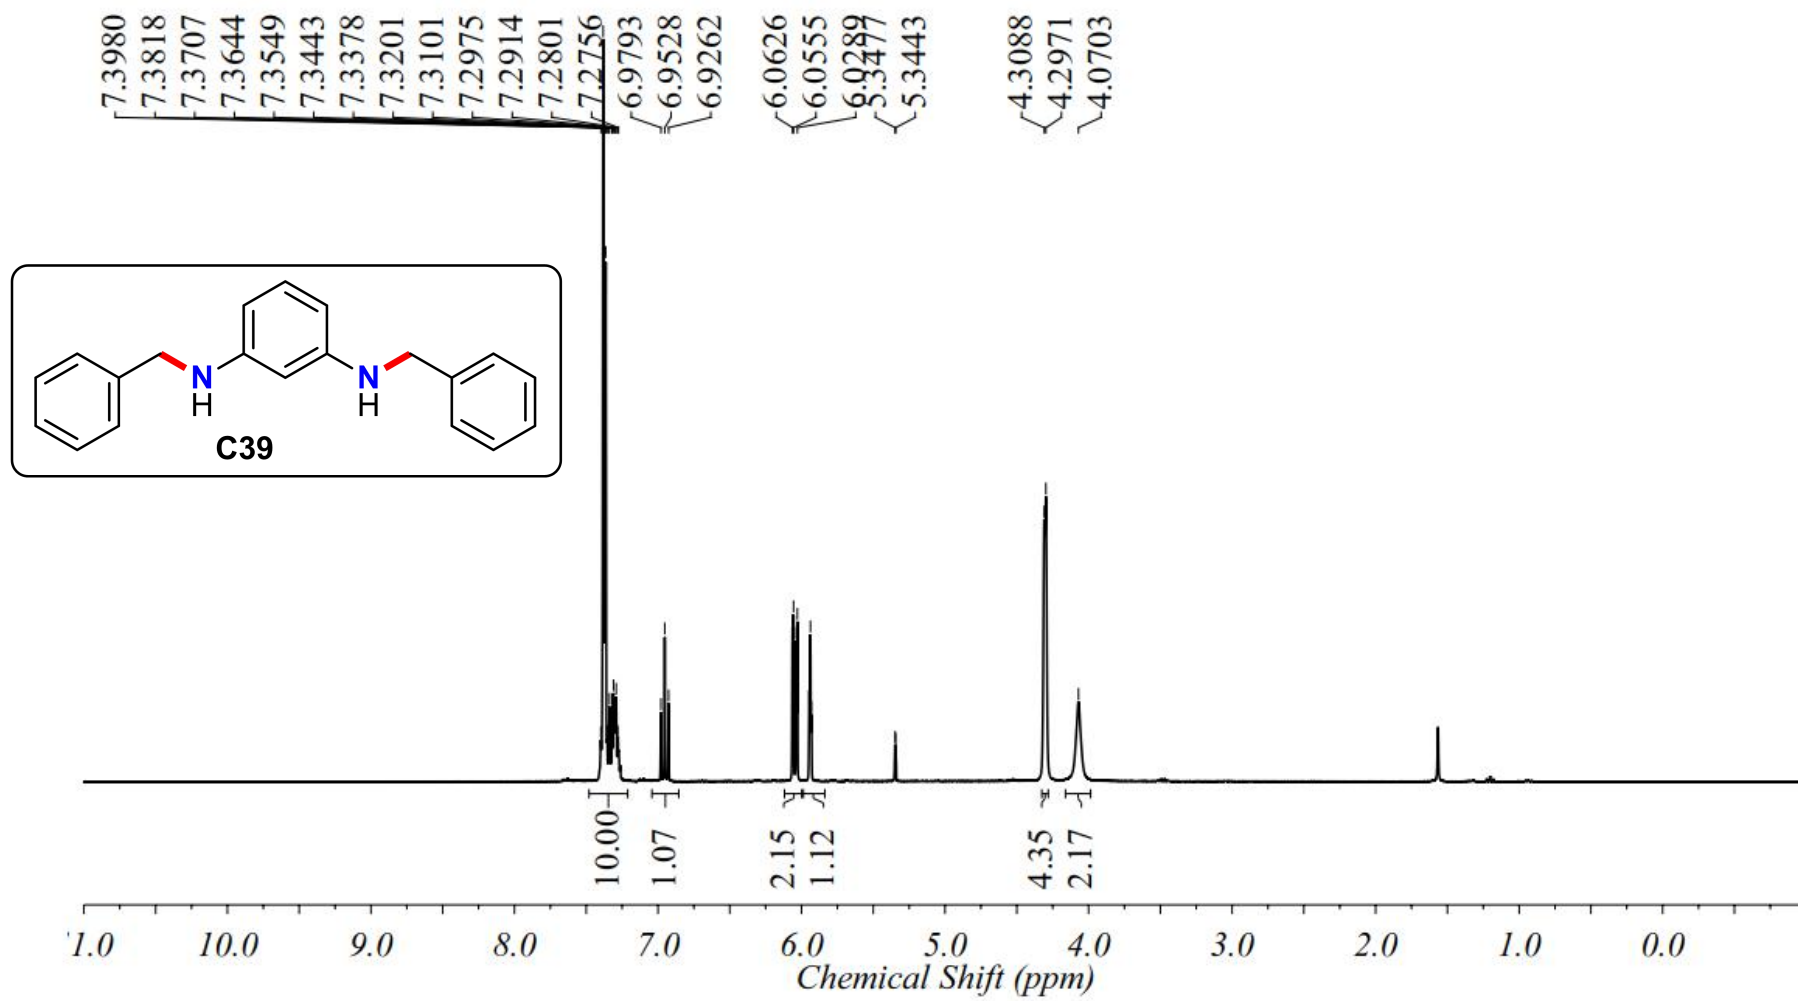

LZY-2019-10-18-1

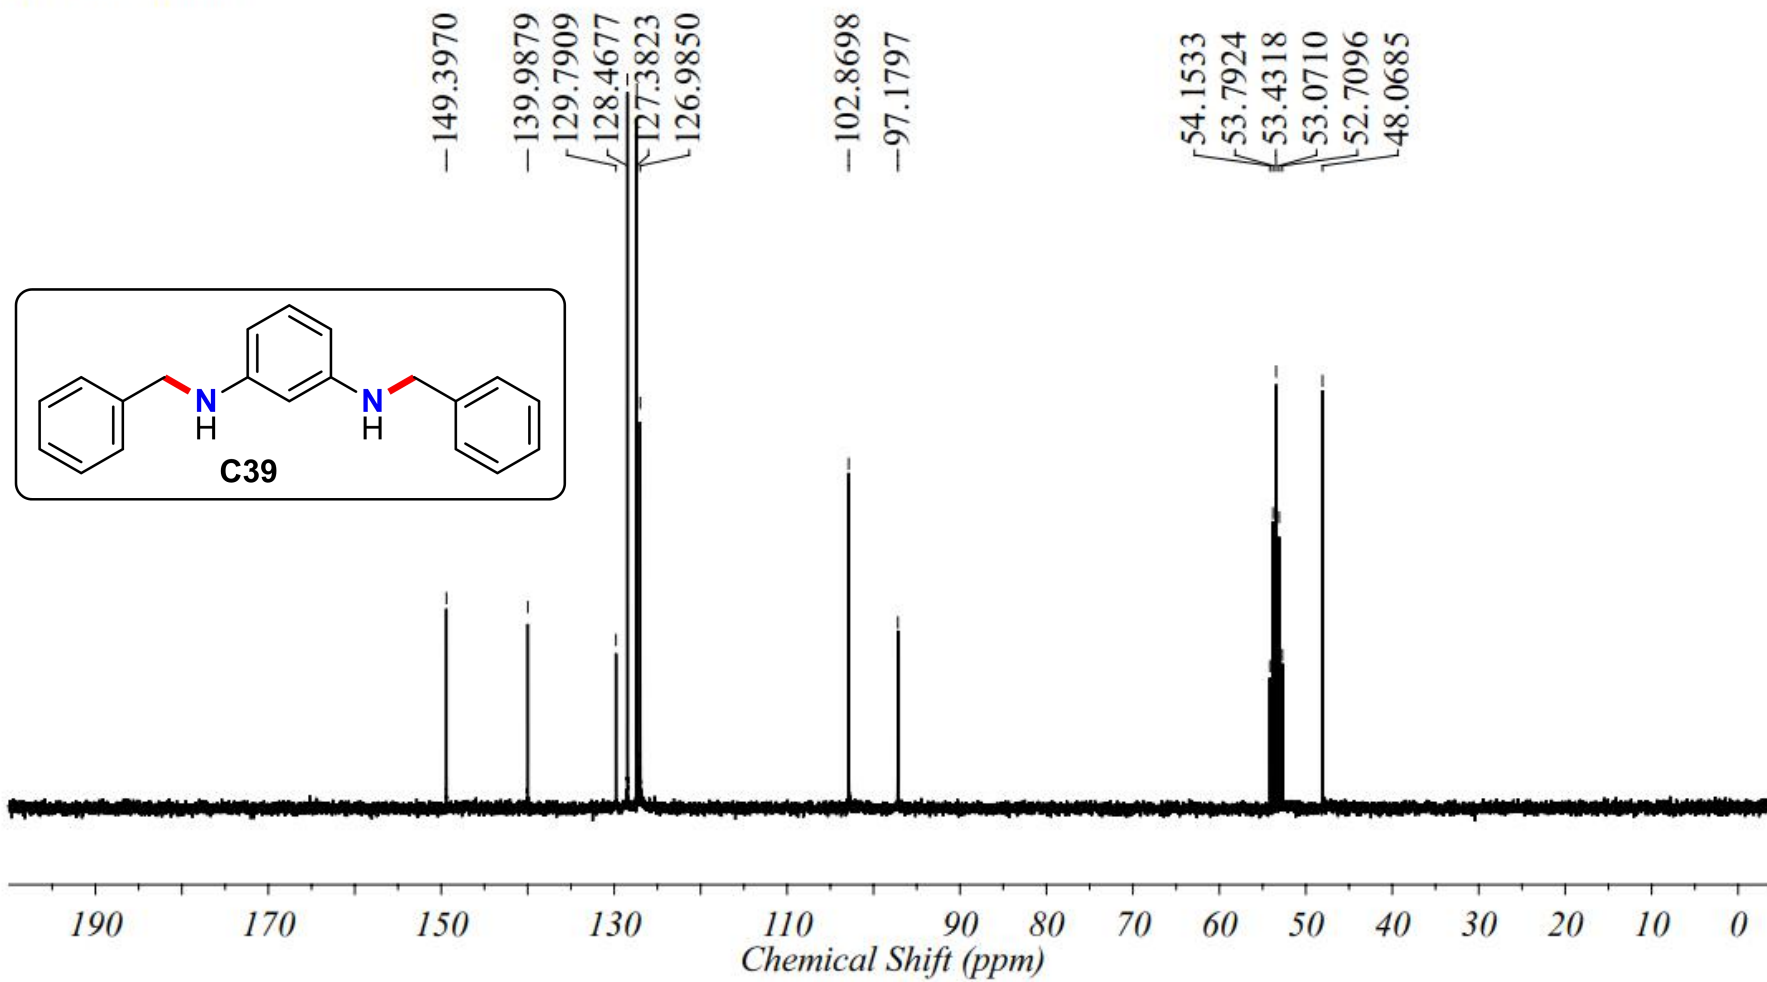

LZY-2019-10-18-2

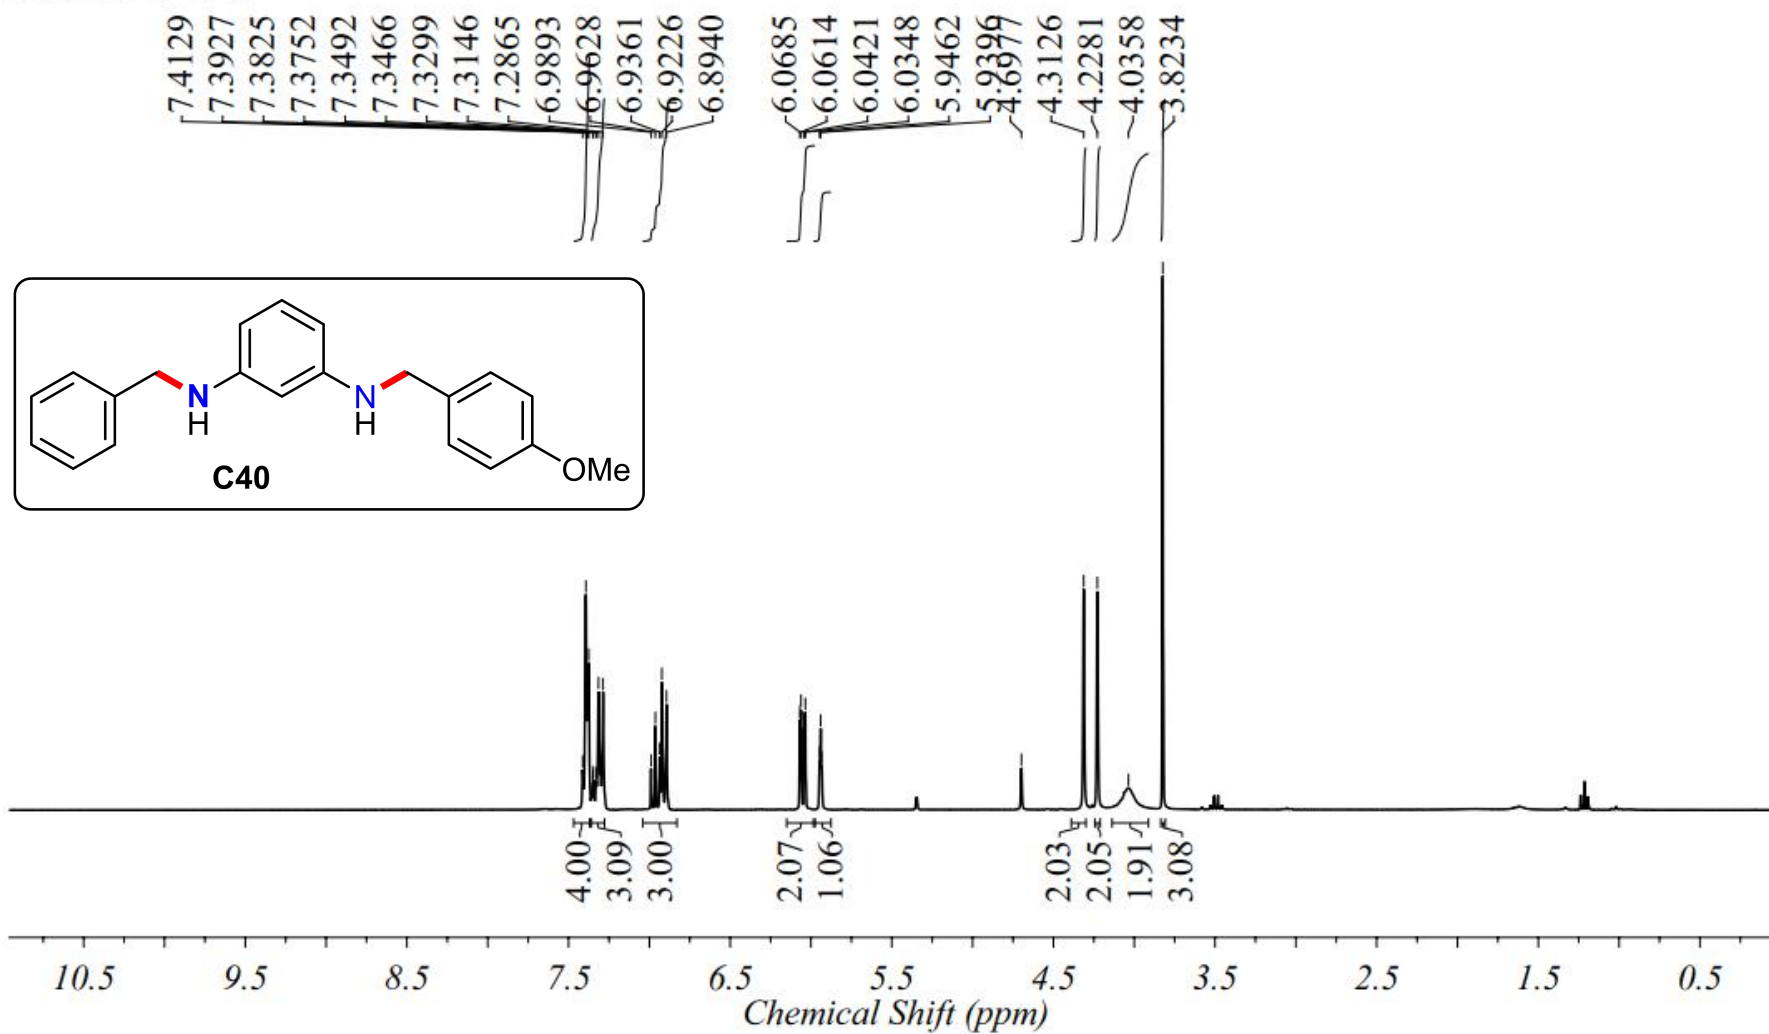

LZY-2019-10-18-2

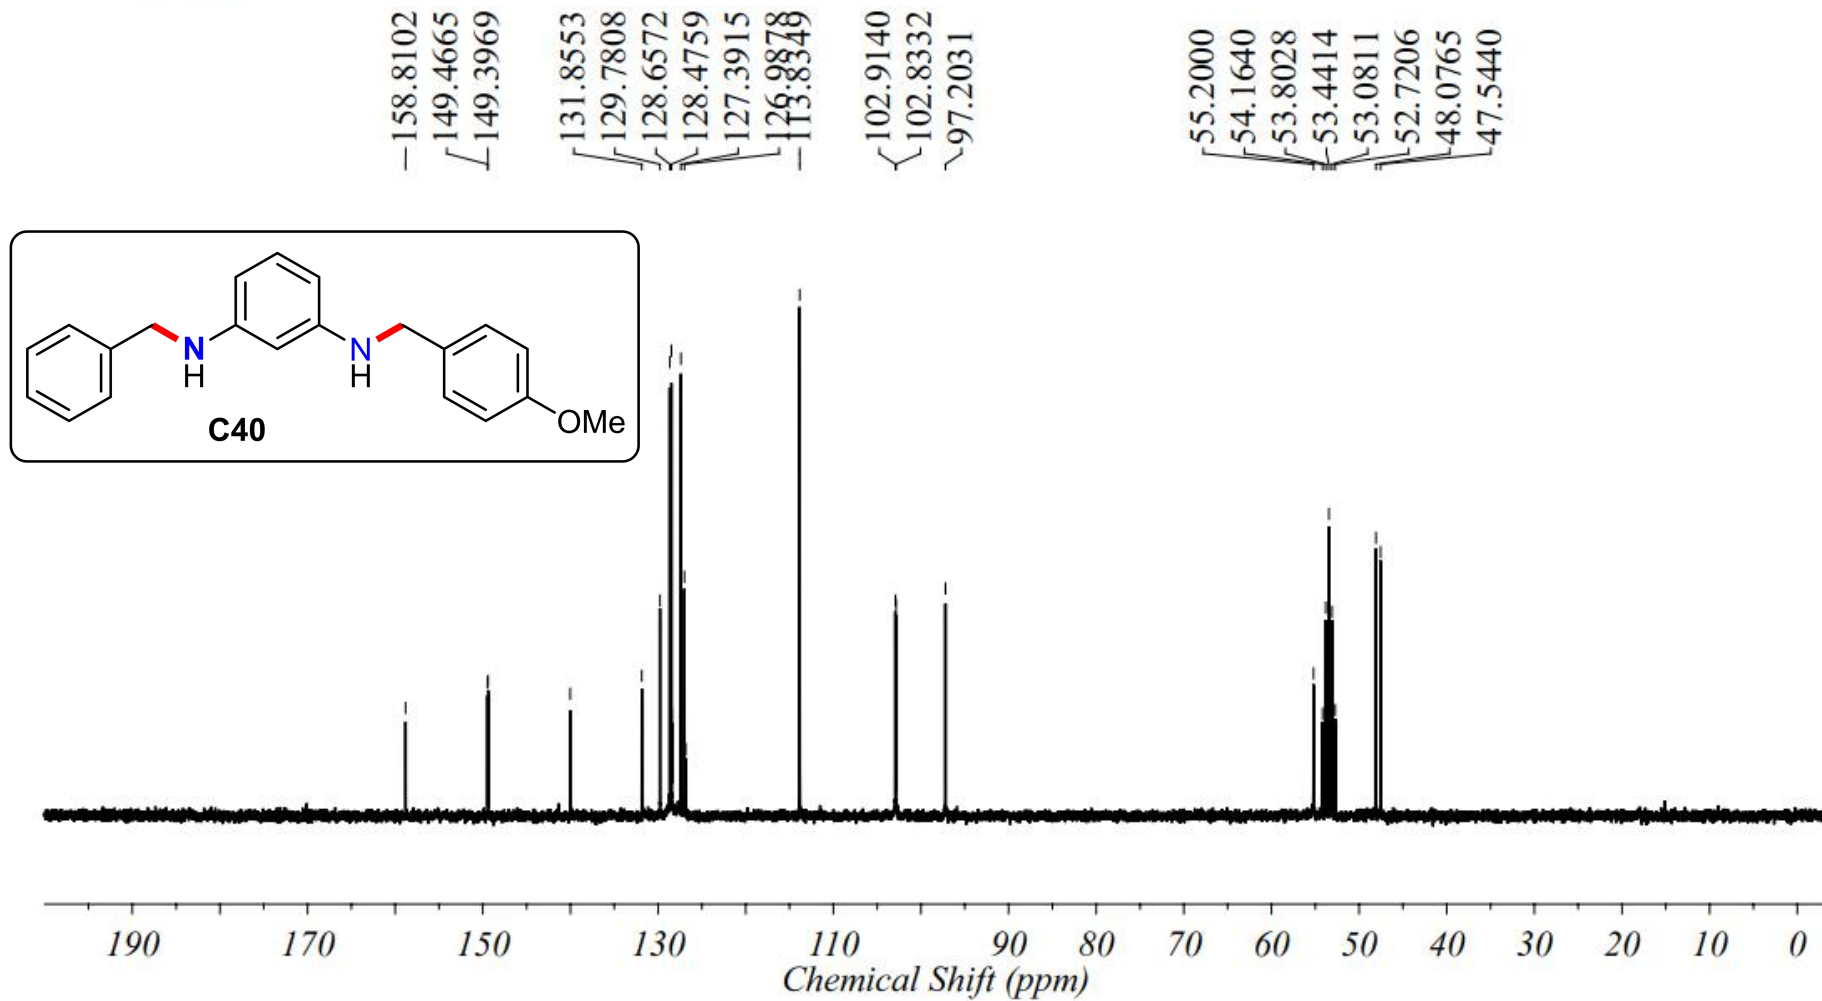

Supplement: d0cc04831c1.pdf [file d0cc04831c1.pdf]
